# Supplementary material
Source: publisher site journal article supplement (https://www.dovepress.com/get_supplementary_file.php?f=282319.xlsx)
Supplement: Supplementary file 1 [file get_supplementary_file.php]

## Sheet: Supplementary table legends
Supplementary materials
Supplementary Table S1	According to the previous miRNA chip results of our group, 1,881 differentially expressed KPC-exosomal miRNAs were uncovered relative to the MPDC-exosomes
Supplementary Table S2	In order to identify prospective target of the differentially miRNA, We performed the gene prediction studies with three online analysis tools, including TargetScan, PITA and microRNA.org. As a result, a total number of 12301 potential target were found
Supplementary Table S3	According to KEGG functional annotations of 12301 potential target gene, there were 281 relevant signalling pathways classified.
Supplementary Table S4	Based on the screening criteria, 799 differentially expressed miRNAs were picked out, of which 339 were up-regulated, while 460 were down-regulated
Supplementary Table S5	There were 59 differentially expressed miRNAs related to signal pathways of osteoclast differentiation: 25 highly expressed and 34 lowly expressed.

## Sheet: Supplementary Table S1
systematic_name	FC ([KPC] vs [MPDC])	Log FC ([KPC] vs [MPDC])	FC (abs) ([KPC] vs [MPDC])	Regulation ([KPC] vs [MPDC])	KPC.txt:gTotalProbeSignal(raw)	MPDC.txt:gTotalProbeSignal(raw)	KPC.txt:gTotalProbeSignal(normalized)	MPDC.txt:gTotalProbeSignal(normalized)	KPC.txt:gFEFlags	MPDC.txt:gFEFlags	active_sequence	mirbase accession No	chr	start	stop	strand	control_type
mmu-let-7a-1-3p	1.63844	0.712327	1.63844	up	0.1	0.1	-2.60961	-3.32194	Not Detected	Not Detected	GGAAAGACAGTAGATTGTATAG	MIMAT0004620	chr13	48633632	48633611	+	0
mmu-let-7a-2-3p	1.63844	0.712327	1.63844	up	0.1	0.1	-2.60961	-3.32194	Not Detected	Not Detected	GAAAGCTAGGAGGCTG	MIMAT0017015	chr9	41344866	41344880	-	0
mmu-let-7a-5p	6.17757	2.62704	6.17757	up	2099.91	1032.47	11.8978	9.27078	Detected	Detected	AACTATACAACCTACTACCT	MIMAT0000521	chr9	41344817	41344836	-	0
mmu-let-7b-3p	1.73784	0.797296	1.73784	up	11.8881	23.4825	4.44741	3.65011	Detected	Detected	GGGAAGGCAGTAGGTT	MIMAT0004621	chr15	85537816	85537830	-	0
mmu-let-7b-5p	390.888	8.61061	390.888	up	5388.35	75.6068	13.9415	5.33092	Detected	Detected	AACCACACAACCTACTACC	MIMAT0000522	chr15	85537759	85537776	-	0
mmu-let-7c-1-3p	1.63844	0.712327	1.63844	up	0.1	0.1	-2.60961	-3.32194	Not Detected	Not Detected	GGAAAGCTAGAAGGTTGTACA	MIMAT0004622	chr16	77599964	77599983	-	0
mmu-let-7c-5p	23.2535	4.53938	23.2535	up	4091.28	637.502	12.9737	8.43434	Detected	Detected	AACCATACAACCTACTACC	MIMAT0000523	chr15	85537049	85537067	-	0
mmu-let-7d-3p	1.63844	0.712327	1.63844	up	0.1	0.1	-2.60961	-3.32194	Not Detected	Not Detected	AGAAAGGCAGCAGGTCGT	MIMAT0000384	chr13	48631471	48631455	+	0
mmu-let-7d-5p	16.8742	4.07675	16.8742	up	1258.56	256.989	11.1877	7.1109	Detected	Detected	AACTATGCAACCTACTACC	MIMAT0000383	chr13	48631417	48631400	+	0
mmu-let-7e-3p	48.0686	5.58702	48.0686	up	1.54269	0.1	2.26508	-3.32194	Detected	Not Detected	GGAAAGCTAGGAGGCCG	MIMAT0017016	chr17	17967381	17967396	-	0
mmu-let-7e-5p	5.42441	2.43947	5.42441	up	1195.7	693.577	11.0439	8.60438	Detected	Detected	AACTATACAACCTCCTACC	MIMAT0000524	chr17	17967334	17967351	-	0
mmu-let-7f-1-3p	1.88701	0.916106	1.88701	up	11.6794	21.8207	4.40528	3.48917	Detected	Detected	GGGAAGGCAATAGATTGTAT	MIMAT0004623	chr13	48633282	48633263	+	0
mmu-let-7f-2-3p	1.63844	0.712327	1.63844	up	0.1	0.1	-2.60961	-3.32194	Not Detected	Not Detected	GAAAGACAGTAGACTGTATA	MIMAT0017017	chrX	148346948	148346966	-	0
mmu-let-7f-5p	5.64417	2.49676	5.64417	up	1078.96	646.23	10.9564	8.45962	Detected	Detected	AACTATACAATCTACTACCTC	MIMAT0000525	chr13	48633226	48633206	+	0
mmu-let-7g-3p	1.63844	0.712327	1.63844	up	0.1	0.1	-2.60961	-3.32194	Not Detected	Not Detected	GCAAGGCAGTGGCCT	MIMAT0004519	chr9	106081241	106081254	-	0
mmu-let-7g-5p	2.6752	1.41965	2.6752	up	810.1	874.733	10.3645	8.94484	Detected	Detected	AACTGTACAAACTACTACCTC	MIMAT0000121	chr9	106081179	106081198	-	0
mmu-let-7i-3p	1.63844	0.712327	1.63844	up	0.1	0.1	-2.60961	-3.32194	Not Detected	Not Detected	AGCAAGGCAGTAGCTT	MIMAT0004520	chr10	122422778	122422764	+	0
mmu-let-7i-5p	11.0017	3.45965	11.0017	up	791.343	198.812	10.2744	6.81473	Detected	Detected	AACAGCACAAACTACTACCTC	MIMAT0000122	chr10	122422722	122422703	+	0
mmu-let-7j	1.63844	0.712327	1.63844	up	0.1	0.1	-2.60961	-3.32194	Not Detected	Not Detected	ATAACAGCACAAACTAATACC	MIMAT0025123					0
mmu-let-7k	9.32524	3.22114	9.32524	up	5.47256	13.4684	3.43593	0.21479	Detected	Detected	CACACAACCTCCTACC	MIMAT0025580					0
mmu-miR-100-3p	1.63844	0.712327	1.63844	up	0.1	0.1	-2.60961	-3.32194	Not Detected	Not Detected	ATACCTATAGACACAAGCTT	MIMAT0017051	chr9	41339557	41339575	-	0
mmu-miR-100-5p	58.9904	5.88241	58.9904	up	321.068	19.3596	9.10374	3.22133	Detected	Detected	CACAAGTTCGGATCTACGG	MIMAT0000655	chr9	41339524	41339541	-	0
mmu-miR-101a-3p	-5.9698	-2.57768	5.9698	down	28.7697	578.826	5.76122	8.3389	Detected	Detected	TTCAGTTATCACAGTACTGTA	MIMAT0000133	chr4	101019620	101019601	+	0
mmu-miR-101a-5p	1.63844	0.712327	1.63844	up	0.1	0.1	-2.60961	-3.32194	Not Detected	Not Detected	GCATCAGCACTGTGAT	MIMAT0004526	chr4	101019584	101019570	+	0
mmu-miR-101b-3p	-140.773	-7.13722	140.773	down	0.1	42.4204	-2.60961	4.52761	Not Detected	Detected	AGCTATCACAGTACTGTAC	MIMAT0000616					0
mmu-miR-101b-5p	1.63844	0.712327	1.63844	up	0.1	0.1	-2.60961	-3.32194	Not Detected	Not Detected	AGCATCGGTACCATGA	MIMAT0017046	chr19	29209800	29209814	-	0
mmu-miR-101c	-10.8947	-3.44555	10.8947	down	5.34175	207.216	3.41419	6.85973	Detected	Detected	TCAGTTATCACAGTACTGT	MIMAT0019349					0
mmu-miR-103-1-5p	1.63844	0.712327	1.63844	up	0.1	0.1	-2.60961	-3.32194	Not Detected	Not Detected	CAAGGCAGCACTGTAA	MIMAT0017024	chr2	131113809	131113824	-	0
mmu-miR-103-3p	-2.56046	-1.35641	2.56046	down	714.726	5249.11	10.1358	11.4922	Detected	Detected	TCATAGCCCTGTACAATG	MIMAT0000546	chr2	131113844	131113861	-	0
mmu-miR-105	1.63844	0.712327	1.63844	up	0.1	0.1	-2.60961	-3.32194	Not Detected	Not Detected	ACCACAAGCATCTGAGCAC	MIMAT0004856					0
mmu-miR-106a-3p	1.63844	0.712327	1.63844	up	0.1	0.1	-2.60961	-3.32194	Not Detected	Not Detected	GTAAGAAGTGCTGGCA	MIMAT0017009	chrX	50095742	50095728	+	0
mmu-miR-106b-3p	-1.19445	-0.256343	1.19445	down	10.156	40.1726	4.1961	4.45244	Detected	Detected	GCAGCAAGTACCCAC	MIMAT0004582	chr5	138607037	138607024	+	0
mmu-miR-106b-5p	-1.11514	-0.157228	1.11514	down	2971.08	13404	12.5067	12.6639	Detected	Detected	ATCTGCACTGTCAGCAC	MIMAT0000386	chr5	138606996	138606981	+	0
mmu-miR-107-3p	-2.76463	-1.46709	2.76463	down	328.319	2569.94	9.12097	10.5881	Detected	Detected	TGATAGCCCTGTACAATGCT	MIMAT0000647	chr19	34895250	34895232	+	0
mmu-miR-107-5p	1.63844	0.712327	1.63844	up	0.1	0.1	-2.60961	-3.32194	Not Detected	Not Detected	CAAGGCAACACTGTAAA	MIMAT0017048	chr19	34895213	34895198	+	0
mmu-miR-10a-3p	-7.11358	-2.83058	7.11358	down	0.1	13.5842	-2.60961	0.220963	Not Detected	Detected	TATTCCCCTAGATACGAA	MIMAT0004659	chr11	96178546	96178562	-	0
mmu-miR-10a-5p	4.34409	2.11905	4.34409	up	29.4415	23.5502	5.79177	3.67272	Detected	Detected	CACAAATTCGGATCTACAGGG	MIMAT0000648	chr11	96178503	96178522	-	0
mmu-miR-10b-3p	-6.78477	-2.7623	6.78477	down	0.1	12.3574	-2.60961	0.152689	Not Detected	Detected	TATTCCCCTAGAATCGAA	MIMAT0004538	chr2	74564176	74564192	-	0
mmu-miR-10b-5p	-2.14096	-1.09826	2.14096	down	57.881	432.457	6.72511	7.82337	Detected	Detected	CACAAATTCGGTTCTACAGGG	MIMAT0000208	chr2	74564134	74564153	-	0
mmu-miR-1187	2.18079	1.12485	2.18079	up	16.0227	25.1528	4.90437	3.77952	Detected	Detected	TTACACACATACACACACA	MIMAT0005837					0
mmu-miR-1188-3p	-4.47767	-2.16275	4.47767	down	0.1	5.38221	-2.60961	-0.446865	Not Detected	Detected	GCAGGGTGTGGTGG	MIMAT0017328	chr12	110850099	110850111	-	0
mmu-miR-1188-5p	18.3205	4.19538	18.3205	up	191.784	34.5621	8.45962	4.26424	Detected	Detected	TCCTGGCCCAACCT	MIMAT0005843	chr12	110850059	110850071	-	0
mmu-miR-1190	-5.48268	-2.45488	5.48268	down	0.1	8.06944	-2.60961	-0.15473	Not Detected	Detected	GACAGAGGGGAACCT	MIMAT0005847					0
mmu-miR-1191a	-6.80282	-2.76613	6.80282	down	0.1	12.4232	-2.60961	0.156521	Not Detected	Detected	TAGGGCTACATAGTAAGACT	MIMAT0005849	chr7	27205617	27205635	-	0
mmu-miR-1191b-3p	1.63844	0.712327	1.63844	up	0.1	0.1	-2.60961	-3.32194	Not Detected	Not Detected	GCTTGGGCTACATAGTG	MIMAT0029867					0
mmu-miR-1191b-5p	61.4027	5.94023	61.4027	up	36.8108	13.5679	6.16033	0.2201	Detected	Detected	AGGTTCTCGCTCTGTAG	MIMAT0029866					0
mmu-miR-1192	1.63844	0.712327	1.63844	up	0.1	0.1	-2.60961	-3.32194	Not Detected	Not Detected	AATTTGGTCTGTTTGTTTG	MIMAT0005850					0
mmu-miR-1193-3p	1.63844	0.712327	1.63844	up	0.1	0.1	-2.60961	-3.32194	Not Detected	Not Detected	GATAGTAAAACGGGTGAC	MIMAT0005851	chr12	110953964	110953980	-	0
mmu-miR-1193-5p	1.63844	0.712327	1.63844	up	0.1	0.1	-2.60961	-3.32194	Not Detected	Not Detected	TGTACGTCACCGGTC	MIMAT0017329					0
mmu-miR-1194	-74.7209	-6.22344	74.7209	down	0.1	22.9518	-2.60961	3.61383	Not Detected	Detected	AGGATCTAGCAGTTACTCA	MIMAT0005852					0
mmu-miR-1195	1.63844	0.712327	1.63844	up	0.1	0.1	-2.60961	-3.32194	Not Detected	Not Detected	TGAGCAGGCTGGCC	MIMAT0005856					0
mmu-miR-1197-3p	1.63844	0.712327	1.63844	up	0.1	0.1	-2.60961	-3.32194	Not Detected	Not Detected	AGAAGTAGACCATGTGTC	MIMAT0005858	chr12	110950610	110950626	-	0
mmu-miR-1197-5p	1.63844	0.712327	1.63844	up	0.1	0.1	-2.60961	-3.32194	Not Detected	Not Detected	CGTACACACCATGGT	MIMAT0017331	chr12	110950578	110950591	-	0
mmu-miR-1198-3p	1.63844	0.712327	1.63844	up	0.1	0.1	-2.60961	-3.32194	Not Detected	Not Detected	GCCATGAGTTAGAGGC	MIMAT0017332					0
mmu-miR-1198-5p	1.25527	0.328001	1.25527	up	44.274	134.272	6.42624	6.09824	Detected	Detected	CCAAGCCAGCCAGG	MIMAT0005859	chrX	7384277	7384289	-	0
mmu-miR-1199-3p	-3.73275	-1.90024	3.73275	down	0.1	3.74038	-2.60961	-0.709372	Not Detected	Detected	GCCGACTGAGCACC	MIMAT0017333	chr8	86535498	86535486	+	0
mmu-miR-1199-5p	15.8029	3.98212	15.8029	up	37.2191	14.8213	6.17295	2.19083	Detected	Detected	CCGCGCGACCG	MIMAT0005860	chr8	86535453	86535444	+	0
mmu-miR-122-3p	1.63844	0.712327	1.63844	up	0.1	0.1	-2.60961	-3.32194	Not Detected	Not Detected	TTAGTGTGATAATGGCGT	MIMAT0017005	chr18	65408558	65408574	-	0
mmu-miR-122-5p	-4.85316	-2.27892	4.85316	down	0.1	6.32274	-2.60961	-0.330689	Not Detected	Detected	CAAACACCATTGTCACACTC	MIMAT0000246	chr18	65408523	65408541	-	0
mmu-miR-1224-3p	1.63844	0.712327	1.63844	up	0.1	0.1	-2.60961	-3.32194	Not Detected	Not Detected	CTGAGGAGAGAAGAGG	MIMAT0017231	chr16	20604595	20604609	-	0
mmu-miR-1224-5p	4.00291	2.00105	4.00291	up	27573	28167	15.5477	13.5466	Detected	Detected	CTCCACCTCCC	MIMAT0005460	chr16	20604536	20604545	-	0
mmu-miR-1231-3p	1.63844	0.712327	1.63844	up	0.1	0.1	-2.60961	-3.32194	Not Detected	Not Detected	CTGTGGGCAGAACAG	MIMAT0022358					0
mmu-miR-1231-5p	-1.02445	-0.0348492	1.02445	down	89.1582	299.453	7.33672	7.37157	Detected	Detected	TCTCTCCTGCAGCTCT	MIMAT0022357					0
mmu-miR-124-3p	-429.627	-8.74694	429.627	down	4.39876	7004.84	3.1987	11.9456	Detected	Detected	GGCATTCACCGCGTG	MIMAT0000134	chr2	180628793	180628807	-	0
mmu-miR-124-5p	-67.4119	-6.07493	67.4119	down	0.1	21.5007	-2.60961	3.46532	Not Detected	Detected	ATCAAGGTCCGCTGTGA	MIMAT0004527	chr2	180628755	180628771	-	0
mmu-miR-1247-3p	1.01753	0.0250697	1.01753	up	27.7079	99.6343	5.72364	5.69857	Detected	Detected	GCTCCAGTCTCGACG	MIMAT0014801	chr12	111516329	111516316	+	0
mmu-miR-1247-5p	-6.72722	-2.75001	6.72722	down	0.1	12.1487	-2.60961	0.140399	Not Detected	Detected	TCCGGGGACGAAC	MIMAT0014800	chr12	111516293	111516282	+	0
mmu-miR-1249-3p	1.77408	0.827067	1.77408	up	175.846	322.501	8.3087	7.48163	Detected	Detected	TGAAGAAGGGGGGGA	MIMAT0010560	chr15	84782034	84782021	+	0
mmu-miR-1249-5p	-43.6439	-5.44771	43.6439	down	0.1	16.315	-2.60961	2.8381	Not Detected	Detected	GAACTTGGCCCATCC	MIMAT0014804	chr15	84782000	84781987	+	0
mmu-miR-1251-3p	1.63844	0.712327	1.63844	up	0.1	0.1	-2.60961	-3.32194	Not Detected	Not Detected	CTACACTGGCTGAGC	MIMAT0014825	chr10	91599956	91599943	+	0
mmu-miR-1251-5p	1.63844	0.712327	1.63844	up	0.1	0.1	-2.60961	-3.32194	Not Detected	Not Detected	AGCGCCTTTGGCAG	MIMAT0014824	chr10	91599918	91599906	+	0
mmu-miR-1258-3p	1.63844	0.712327	1.63844	up	0.1	0.1	-2.60961	-3.32194	Not Detected	Not Detected	TACTGCTGAGCTAATTCC	MIMAT0029905					0
mmu-miR-1258-5p	1.63844	0.712327	1.63844	up	0.1	0.1	-2.60961	-3.32194	Not Detected	Not Detected	CAGTTAGGGAATTAGCTC	MIMAT0029904					0
mmu-miR-125a-3p	3.86392	1.95007	3.86392	up	470.293	371.725	9.57992	7.62985	Detected	Detected	GGCTCCCAAGAACCTC	MIMAT0004528					0
mmu-miR-125a-5p	6.1348	2.61702	6.1348	up	668.245	314.471	10.0608	7.44377	Detected	Detected	TCACAGGTTAAAGGGTCTC	MIMAT0000135					0
mmu-miR-125b-1-3p	1.63844	0.712327	1.63844	up	0.1	0.1	-2.60961	-3.32194	Not Detected	Not Detected	AGCTCCCAAGAGCCT	MIMAT0004669	chr9	41390071	41390084	-	0
mmu-miR-125b-2-3p	16.441	4.03922	16.441	up	5.67385	4.5131	3.46532	-0.573905	Detected	Detected	AGGTCCCAAGAACCTG	MIMAT0004529	chr16	77646570	77646584	-	0
mmu-miR-125b-5p	27.2635	4.7689	27.2635	up	4350.9	645.154	13.2164	8.44747	Detected	Detected	TCACAAGTTAGGGTCTC	MIMAT0000136					0
mmu-miR-1264-3p	1.63844	0.712327	1.63844	up	0.1	0.1	-2.60961	-3.32194	Not Detected	Not Detected	ACAGGTGCTCAAATAAGA	MIMAT0014803					0
mmu-miR-1264-5p	1.63844	0.712327	1.63844	up	0.1	0.1	-2.60961	-3.32194	Not Detected	Not Detected	AACAAATACTTATTGAGGACC	MIMAT0014802					0
mmu-miR-126a-3p	-1.69021	-0.757206	1.69021	down	51.2747	296.109	6.60216	7.35936	Detected	Detected	CGCATTATTACTCACGGTA	MIMAT0000138	chr2	26591406	26591423	-	0
mmu-miR-126a-5p	-4.09159	-2.03266	4.09159	down	0.1	4.49409	-2.60961	-0.57695	Not Detected	Detected	CGCGTACCAAAAGTAATAATG	MIMAT0000137	chr2	26591366	26591385	-	0
mmu-miR-126b-3p	1.63844	0.712327	1.63844	up	0.1	0.1	-2.60961	-3.32194	Not Detected	Not Detected	CACATTATTACTTTTGGTACG	MIMAT0029895					0
mmu-miR-126b-5p	1.63844	0.712327	1.63844	up	0.1	0.1	-2.60961	-3.32194	Not Detected	Not Detected	AACTCGTACCGTGAGT	MIMAT0029894					0
mmu-miR-127-3p	1.63844	0.712327	1.63844	up	0.1	0.1	-2.60961	-3.32194	Not Detected	Not Detected	AGCCAAGCTCAGACGGAT	MIMAT0000139	chr12	110831103	110831119	-	0
mmu-miR-127-5p	-4.42514	-2.14572	4.42514	down	0.1	5.25667	-2.60961	-0.463889	Not Detected	Detected	ATCAGAGCCCTCTGA	MIMAT0004530	chr12	110831072	110831085	-	0
mmu-miR-128-1-5p	1.63844	0.712327	1.63844	up	0.1	0.1	-2.60961	-3.32194	Not Detected	Not Detected	TCAGACAGTGCTACGG	MIMAT0016982	chr1	130098952	130098966	-	0
mmu-miR-128-2-5p	-44.3413	-5.47058	44.3413	down	0.1	16.5298	-2.60961	2.86097	Not Detected	Detected	TCTCTTACAGTGCATCG	MIMAT0017069	chr9	112021172	112021157	+	0
mmu-miR-128-3p	-3.1549	-1.65759	3.1549	down	94.108	931.23	7.41911	9.07671	Detected	Detected	AAAGAGACCGGTTCACTGTG	MIMAT0000140	chr1	130098982	130099001	-	0
mmu-miR-129-1-3p	-5.0539	-2.3374	5.0539	down	4.02133	83.3137	3.10864	5.44604	Detected	Detected	ATACTTTTTGGGGTAAGGG	MIMAT0016994					0
mmu-miR-129-2-3p	-3.84748	-1.94391	3.84748	down	7.17043	98.2762	3.73835	5.68227	Detected	Detected	ATGCTTTTTGGGGTAAGG	MIMAT0000544	chr2	94081598	94081582	+	0
mmu-miR-129-5p	-9.33444	-3.22256	9.33444	down	3.3821	137.156	2.91427	6.13683	Detected	Detected	GCAAGCCCAGACCGC	MIMAT0000209					0
mmu-miR-1291	-7.06643	-2.82098	7.06643	down	0.1	13.4047	-2.60961	0.21137	Not Detected	Detected	AACTGCTAGTCTTCAGTAA	MIMAT0031397					0
mmu-miR-1298-3p	1.63844	0.712327	1.63844	up	0.1	0.1	-2.60961	-3.32194	Not Detected	Not Detected	AGTTCAATCAGTTGCCC	MIMAT0014810	chrX	143499519	143499534	-	0
mmu-miR-1298-5p	1.63844	0.712327	1.63844	up	0.1	0.1	-2.60961	-3.32194	Not Detected	Not Detected	TACATCTGGACAGCCG	MIMAT0014809	chrX	143499468	143499482	-	0
mmu-miR-129b-3p	1.63844	0.712327	1.63844	up	0.1	0.1	-2.60961	-3.32194	Not Detected	Not Detected	AATCTTTTTGCGGTCTG	MIMAT0029863					0
mmu-miR-129b-5p	1.45648	0.54249	1.45648	up	11.3606	26.1169	4.37987	3.83738	Detected	Detected	GGAAGCCCTTACCCC	MIMAT0029862					0
mmu-miR-1306-3p	-2.98764	-1.579	2.98764	down	48.0214	502.916	6.52924	8.10825	Detected	Detected	CATCACCACCAGAGC	MIMAT0009411	chr16	18284331	18284318	+	0
mmu-miR-1306-5p	-3.79229	-1.92307	3.79229	down	0.1	3.86064	-2.60961	-0.686544	Not Detected	Detected	GGACGTTTGCAGGG	MIMAT0019136					0
mmu-miR-130a-3p	-2.4494	-1.29243	2.4494	down	2169.52	20819.5	11.9239	13.2164	Detected	Detected	ATGCCCTTTTAACATTGCA	MIMAT0000141	chr2	84581334	84581317	+	0
mmu-miR-130a-5p	1.63844	0.712327	1.63844	up	0.1	0.1	-2.60961	-3.32194	Not Detected	Not Detected	AGTAGCACAATGTGAAAAG	MIMAT0016983	chr2	84581295	84581278	+	0
mmu-miR-130b-3p	-1.71516	-0.778345	1.71516	down	1690.83	10062.5	11.6039	12.3822	Detected	Detected	ATGCCCTTTCATCATTGC	MIMAT0000387	chr16	17124225	17124209	+	0
mmu-miR-130b-5p	7.81041	2.9654	7.81041	up	4.42734	13.9154	3.20374	0.238343	Detected	Detected	AGTAGTGCAACAGGGAAAGA	MIMAT0004583	chr16	17124187	17124169	+	0
mmu-miR-130c	1.63844	0.712327	1.63844	up	0.1	0.1	-2.60961	-3.32194	Not Detected	Not Detected	CACACCTTGGAACATTG	MIMAT0025132					0
mmu-miR-132-3p	4.82001	2.26904	4.82001	up	87.4663	61.4035	7.29781	5.02878	Detected	Detected	CGACCATGGCTGTAGA	MIMAT0000144	chr11	74987232	74987246	-	0
mmu-miR-132-5p	1.63844	0.712327	1.63844	up	0.1	0.1	-2.60961	-3.32194	Not Detected	Not Detected	GTAACAATCGAAAGCCA	MIMAT0016984	chr11	74987194	74987209	-	0
mmu-miR-133a-3p	1.10081	0.138569	1.10081	up	6.90558	22.1083	3.67272	3.53415	Detected	Detected	CAGCTGGTTGAAGGGGAC	MIMAT0000145	chr2	180133146	180133163	-	0
mmu-miR-133a-5p	1.63844	0.712327	1.63844	up	0.1	0.1	-2.60961	-3.32194	Not Detected	Not Detected	ATTTGGTTCCATTTTACCAG	MIMAT0003473	chr2	180133107	180133126	-	0
mmu-miR-133b-3p	1.15236	0.204592	1.15236	up	6.568	21.2746	3.61878	3.41419	Detected	Detected	TAGCTGGTTGAAGGGGACC	MIMAT0000769	chr1	20672919	20672936	-	0
mmu-miR-133b-5p	1.63844	0.712327	1.63844	up	0.1	0.1	-2.60961	-3.32194	Not Detected	Not Detected	GACTTGGTTCCGTTTG	MIMAT0017083	chr1	20672885	20672899	-	0
mmu-miR-133c	1.63844	0.712327	1.63844	up	0.1	0.1	-2.60961	-3.32194	Not Detected	Not Detected	CTGACTCCTTGAAGGG	MIMAT0025078					0
mmu-miR-134-3p	1.63844	0.712327	1.63844	up	0.1	0.1	-2.60961	-3.32194	Not Detected	Not Detected	GGTGACTAGGTGGCC	MIMAT0016985	chr12	110972400	110972413	-	0
mmu-miR-134-5p	2.78088	1.47554	2.78088	up	171.359	196.449	8.24931	6.77376	Detected	Detected	CCCCTCTGGTCAA	MIMAT0000146	chr12	110972365	110972376	-	0
mmu-miR-135a-1-3p	-3.3525	-1.74524	3.3525	down	101.586	1033.77	7.53515	9.28038	Detected	Detected	CGCCACGGCTCCA	MIMAT0004531	chr9	106056519	106056531	-	0
mmu-miR-135a-2-3p	-195.79	-7.61316	195.79	down	0.1	61.0096	-2.60961	5.00355	Not Detected	Detected	TTCATGGCTTCCATCC	MIMAT0017064	chr10	91534912	91534898	+	0
mmu-miR-135a-5p	-273.851	-8.09725	273.851	down	0.1	86.7694	-2.60961	5.48764	Not Detected	Detected	TCACATAGGAATAAAAAGCCATA	MIMAT0000147	chr9	106056471	106056493	-	0
mmu-miR-135b-3p	-7.13594	-2.8351	7.13594	down	0.1	13.6697	-2.60961	0.225491	Not Detected	Detected	CCCATGGCTTTTAGCC	MIMAT0017044	chr1	134094726	134094740	-	0
mmu-miR-135b-5p	-10406.1	-13.3451	10406.1	down	0.1	2879.28	-2.60961	10.7355	Not Detected	Detected	TCACATAGGAATGAAAAGCCATA	MIMAT0000612	chr1	134094681	134094702	-	0
mmu-miR-136-3p	1.63844	0.712327	1.63844	up	0.1	0.1	-2.60961	-3.32194	Not Detected	Not Detected	AAGACTCATTTGAGACGATGAT	MIMAT0004532	chr12	110833577	110833597	-	0
mmu-miR-136-5p	1.63844	0.712327	1.63844	up	0.1	0.1	-2.60961	-3.32194	Not Detected	Not Detected	CCATCATCAAAACAAATGGAGT	MIMAT0000148	chr12	110833542	110833562	-	0
mmu-miR-137-3p	-3.57271	-1.83702	3.57271	down	0.1	3.42652	-2.60961	-0.772592	Not Detected	Detected	CTACGCGTATTCTTAAGCAA	MIMAT0000149	chr3	118136823	118136841	-	0
mmu-miR-137-5p	1.63844	0.712327	1.63844	up	0.1	0.1	-2.60961	-3.32194	Not Detected	Not Detected	ATTATCCACCCAAGAATACC	MIMAT0016986	chr3	118136787	118136805	-	0
mmu-miR-138-1-3p	2.17362	1.1201	2.17362	up	25.0245	40.6693	5.59789	4.47779	Detected	Detected	CCCTGGTGTTGTG	MIMAT0004668	chr9	122592063	122592075	-	0
mmu-miR-138-2-3p	-5.58399	-2.4813	5.58399	down	3.00986	72.619	2.79918	5.28047	Detected	Detected	ACCCTGGTGTCGTG	MIMAT0016987	chr8	96848267	96848279	-	0
mmu-miR-138-5p	-193.072	-7.59299	193.072	down	0.1	59.4106	-2.60961	4.98338	Not Detected	Detected	CGGCCTGATTCACAA	MIMAT0000150	chr8	96848220	96848234	-	0
mmu-miR-139-3p	-1.07161	-0.0997791	1.07161	down	21.4276	82.4729	5.33092	5.4307	Detected	Detected	CTCCAACAGGGCCG	MIMAT0004662					0
mmu-miR-139-5p	-1.21552	-0.281572	1.21552	down	2.89638	17.8184	2.75182	3.03339	Detected	Detected	CTGGAGACACGTGCACT	MIMAT0000656					0
mmu-miR-140-3p	1.1006	0.138289	1.1006	up	226.654	670.95	8.68298	8.54468	Detected	Detected	CCGTGGTTCTACCCT	MIMAT0000152	chr8	110075195	110075208	-	0
mmu-miR-140-5p	-2.25365	-1.17226	2.25365	down	169.343	1148.34	8.21735	9.38962	Detected	Detected	CTACCATAGGGTAAAACCACT	MIMAT0000151	chr8	110075151	110075170	-	0
mmu-miR-141-3p	-1.31078	-0.390421	1.31078	down	23.5991	114.323	5.51472	5.90514	Detected	Detected	CCATCTTTACCAGACAG	MIMAT0000153	chr6	124668000	124667985	+	0
mmu-miR-141-5p	-2.42811	-1.27983	2.42811	down	0.1	1.58268	-2.60961	-1.32978	Not Detected	Detected	TCCAACACTGCACTGGA	MIMAT0004533	chr6	124667958	124667943	+	0
mmu-miR-142a-3p	21.3432	4.41571	21.3432	up	187.713	29.1315	8.43434	4.01863	Detected	Detected	TCCATAAAGTAGGAAACACTACA	MIMAT0000155	chr11	87756904	87756925	-	0
mmu-miR-142a-5p	537.555	9.07027	537.555	up	28.3855	0.1	5.74833	-3.32194	Detected	Not Detected	AGTAGTGCTTTCTACTTTA	MIMAT0000154	chr11	87756870	87756887	-	0
mmu-miR-142b	1.63844	0.712327	1.63844	up	0.1	0.1	-2.60961	-3.32194	Not Detected	Not Detected	AGTGTTTCCTACTTTATGGA	MIMAT0031402					0
mmu-miR-143-3p	-42.0769	-5.39496	42.0769	down	0.1	16.0364	-2.60961	2.78534	Not Detected	Detected	GAGCTACAGTGCTTCA	MIMAT0000247	chr18	61808909	61808895	+	0
mmu-miR-143-5p	1.63844	0.712327	1.63844	up	0.1	0.1	-2.60961	-3.32194	Not Detected	Not Detected	CCAGAGATGCAGCAC	MIMAT0017006	chr18	61808875	61808862	+	0
mmu-miR-144-3p	1.63844	0.712327	1.63844	up	0.1	0.1	-2.60961	-3.32194	Not Detected	Not Detected	AGTACATCATCTATACTGTA	MIMAT0000156	chr11	77886550	77886568	-	0
mmu-miR-144-5p	1.63844	0.712327	1.63844	up	0.1	0.1	-2.60961	-3.32194	Not Detected	Not Detected	ACTTACAGTATATGATGATATCC	MIMAT0016988	chr11	77886513	77886534	-	0
mmu-miR-145a-3p	1.63844	0.712327	1.63844	up	0.1	0.1	-2.60961	-3.32194	Not Detected	Not Detected	CAAGAACAGTATTTCCAGGAA	MIMAT0004534	chr18	61807546	61807526	+	0
mmu-miR-145a-5p	-5.38764	-2.42965	5.38764	down	0.1	7.79208	-2.60961	-0.17996	Not Detected	Detected	AGGGATTCCTGGGA	MIMAT0000157	chr18	61807507	61807494	+	0
mmu-miR-145b	1.63844	0.712327	1.63844	up	0.1	0.1	-2.60961	-3.32194	Not Detected	Not Detected	AGTCTCCTGGGAAAACT	MIMAT0025105					0
mmu-miR-146a-3p	1.63844	0.712327	1.63844	up	0.1	0.1	-2.60961	-3.32194	Not Detected	Not Detected	CTGAAGAACTGAATTTCAC	MIMAT0016989	chr11	43187961	43187944	+	0
mmu-miR-146a-5p	540.535	9.07825	540.535	up	231.835	6.21229	8.73484	-0.343401	Detected	Detected	AACCCATGGAATTCAGTTC	MIMAT0000158	chr11	43187925	43187908	+	0
mmu-miR-146b-3p	1.63844	0.712327	1.63844	up	0.1	0.1	-2.60961	-3.32194	Not Detected	Not Detected	ACCAGAACTGAGTCCCT	MIMAT0004826	chr19	46417324	46417339	-	0
mmu-miR-146b-5p	-212.246	-7.72959	212.246	down	0.1	65.5157	-2.60961	5.11998	Not Detected	Detected	AGCCTATGGAATTCAGTTC	MIMAT0003475	chr19	46417284	46417301	-	0
mmu-miR-147-3p	1.63844	0.712327	1.63844	up	0.1	0.1	-2.60961	-3.32194	Not Detected	Not Detected	TAGCAGAAGCATTTCCGC	MIMAT0004857	chr2	122466591	122466607	-	0
mmu-miR-147-5p	1.63844	0.712327	1.63844	up	0.1	0.1	-2.60961	-3.32194	Not Detected	Not Detected	CTAGTTTGTGCAGAAATGT	MIMAT0017269	chr2	122466556	122466573	-	0
mmu-miR-148a-3p	-4321.95	-12.0775	4321.95	down	0.1	1189.69	-2.60961	9.46785	Not Detected	Detected	ACAAAGTTCTGTAGTGCACT	MIMAT0000516	chr6	51219892	51219874	+	0
mmu-miR-148a-5p	1.63844	0.712327	1.63844	up	0.1	0.1	-2.60961	-3.32194	Not Detected	Not Detected	AGTCGGAGTGTCTCAG	MIMAT0004617	chr6	51219854	51219840	+	0
mmu-miR-148b-3p	-2.40991	-1.26898	2.40991	down	32.8339	279.375	5.97775	7.24673	Detected	Detected	ACAAAGTTCTGTGATGCAC	MIMAT0000580	chr15	103115620	103115637	-	0
mmu-miR-148b-5p	-4.23242	-2.08148	4.23242	down	0.1	4.80878	-2.60961	-0.528129	Not Detected	Detected	AGCCTGAGTGTATAACAGA	MIMAT0017036	chr15	103115585	103115602	-	0
mmu-miR-149-3p	1.61522	0.691731	1.61522	up	274.725	532.648	8.92808	8.23635	Detected	Detected	GCACCGCCCCC	MIMAT0016990	chr1	94747010	94747019	-	0
mmu-miR-149-5p	1.2345	0.303931	1.2345	up	16.8671	48.1006	5.00355	4.69962	Detected	Detected	GGGAGTGAAGACACGGAG	MIMAT0000159	chr1	94746964	94746980	-	0
mmu-miR-150-3p	3.08839	1.62686	3.08839	up	22.5577	25.7078	5.4307	3.80384	Detected	Detected	CTATCCCCCAGGC	MIMAT0004535	chr7	52377178	52377189	-	0
mmu-miR-150-5p	-350.111	-8.45167	350.111	down	0.1	109.214	-2.60961	5.84206	Not Detected	Detected	CACTGGTACAAGGGTT	MIMAT0000160	chr7	52377139	52377153	-	0
mmu-miR-151-3p	12.5014	3.64401	12.5014	up	2.30334	2.29765	2.58313	-1.06088	Detected	Detected	CCTCAAGGAGCCTC	MIMAT0000161					0
mmu-miR-151-5p	-2.76059	-1.46497	2.76059	down	518.902	4325.61	9.79867	11.2636	Detected	Detected	ACTAGACTGTGAGCTCCT	MIMAT0004536					0
mmu-miR-152-3p	2.3444	1.22922	2.3444	up	117.9	179.105	7.7938	6.56458	Detected	Detected	CCAAGTTCTGTCATGCA	MIMAT0000162	chr11	96711758	96711773	-	0
mmu-miR-152-5p	1.63844	0.712327	1.63844	up	0.1	0.1	-2.60961	-3.32194	Not Detected	Not Detected	AGTCGGAGTGTATCACA	MIMAT0016991	chr11	96711722	96711737	-	0
mmu-miR-153-3p	-86.3949	-6.43288	86.3949	down	0.1	25.918	-2.60961	3.82326	Not Detected	Detected	GATCACTTTTGTGACTATGC	MIMAT0000163	chr12	118489336	118489354	-	0
mmu-miR-153-5p	1.63844	0.712327	1.63844	up	0.1	0.1	-2.60961	-3.32194	Not Detected	Not Detected	AGCTGCAACGTCACA	MIMAT0016992	chr12	118489303	118489316	-	0
mmu-miR-154-3p	1.63844	0.712327	1.63844	up	0.1	0.1	-2.60961	-3.32194	Not Detected	Not Detected	AATAGGTCAACCGTGTATGA	MIMAT0004537	chr12	110976687	110976705	-	0
mmu-miR-154-5p	1.63844	0.712327	1.63844	up	0.1	0.1	-2.60961	-3.32194	Not Detected	Not Detected	CGAAGGCAACACGGATAACC	MIMAT0000164	chr12	110976651	110976669	-	0
mmu-miR-155-3p	1.63844	0.712327	1.63844	up	0.1	0.1	-2.60961	-3.32194	Not Detected	Not Detected	GTTAATGCTAACAGGTAGG	MIMAT0016993	chr16	84714430	84714447	-	0
mmu-miR-155-5p	7.97523	2.99553	7.97523	up	456.104	178.684	9.55493	6.5594	Detected	Detected	ACCCCTATCACAATTAGC	MIMAT0000165	chr16	84714394	84714410	-	0
mmu-miR-15a-3p	1.63844	0.712327	1.63844	up	0.1	0.1	-2.60961	-3.32194	Not Detected	Not Detected	TGAGGCAGCACAGTAT	MIMAT0004624	chr14	62250936	62250922	+	0
mmu-miR-15a-5p	-2.84343	-1.50763	2.84343	down	695.654	5729.83	10.0963	11.6039	Detected	Detected	CACAAACCATTATGTGCTGCTA	MIMAT0000526	chr14	62250899	62250879	+	0
mmu-miR-15b-3p	6.65119	2.73361	6.65119	up	1.54943	5.28701	2.27387	-0.459738	Detected	Detected	TAGAGCAGCAAATAATGATTCG	MIMAT0004521	chr3	68813736	68813756	-	0
mmu-miR-15b-5p	-1.93483	-0.952208	1.93483	down	2667.66	20474.9	12.2492	13.2014	Detected	Detected	TGTAAACCATGATGTGCTGC	MIMAT0000124	chr3	68813700	68813718	-	0
mmu-miR-16-1-3p	1.63844	0.712327	1.63844	up	0.1	0.1	-2.60961	-3.32194	Not Detected	Not Detected	TCAGCAGCACAGTCA	MIMAT0004625	chr14	62250795	62250781	+	0
mmu-miR-16-2-3p	1.63844	0.712327	1.63844	up	0.1	0.1	-2.60961	-3.32194	Not Detected	Not Detected	AAAGCAGCACAATAATATTGG	MIMAT0017018	chr3	68813884	68813903	-	0
mmu-miR-16-5p	-2.54798	-1.34935	2.54798	down	1057.89	8572.26	10.8473	12.1967	Detected	Detected	CGCCAATATTTACGTGCT	MIMAT0000527	chr3	68813844	68813861	-	0
mmu-miR-1668	1.63844	0.712327	1.63844	up	0.1	0.1	-2.60961	-3.32194	Not Detected	Not Detected	CTGCAGAGAAGGAGG	MIMAT0031414					0
mmu-miR-17-3p	-6.5291	-2.70688	6.5291	down	106.466	2140.75	7.64167	10.3485	Detected	Detected	CTACAAGTGCCCTCA	MIMAT0000650	chr14	115442951	115442964	-	0
mmu-miR-17-5p	-3.90496	-1.96531	3.90496	down	74.8064	940.854	7.12383	9.08914	Detected	Detected	CTACCTGCACTGT	MIMAT0000649	chr14	115442916	115442928	-	0
mmu-miR-181a-1-3p	1.63844	0.712327	1.63844	up	0.1	0.1	-2.60961	-3.32194	Not Detected	Not Detected	GGTACAATCAACGGTCGA	MIMAT0000660	chr1	139863090	139863106	-	0
mmu-miR-181a-2-3p	1.63844	0.712327	1.63844	up	0.1	0.1	-2.60961	-3.32194	Not Detected	Not Detected	CAAGGTACAGTCAACGGTC	MIMAT0005443	chr2	38708312	38708329	-	0
mmu-miR-181a-5p	1.87114	0.903914	1.87114	up	9.89266	19.714	4.1537	3.24978	Detected	Detected	ACTCACCGACAGCG	MIMAT0000210	chr1	139863054	139863067	-	0
mmu-miR-181b-1-3p	1.63844	0.712327	1.63844	up	0.1	0.1	-2.60961	-3.32194	Not Detected	Not Detected	GCATTCATTGTTCAGTGA	MIMAT0017067	chr1	139863269	139863285	-	0
mmu-miR-181b-2-3p	1.63844	0.712327	1.63844	up	0.1	0.1	-2.60961	-3.32194	Not Detected	Not Detected	TTTGCATTCATTGATCAGT	MIMAT0017084	chr2	38709407	38709424	-	0
mmu-miR-181b-5p	1.93014	0.948702	1.93014	up	39.4365	75.2754	6.27183	5.32313	Detected	Detected	ACCCACCGACAGCA	MIMAT0000673	chr1	139863236	139863249	-	0
mmu-miR-181c-3p	18.3879	4.20069	18.3879	up	8.89554	7.59881	4.00261	-0.198077	Detected	Detected	GGTCCACTCAACGG	MIMAT0017068	chr8	86702848	86702836	+	0
mmu-miR-181c-5p	-6.56423	-2.71463	6.56423	down	30.1294	676.906	5.84206	8.55668	Detected	Detected	ACTCACCGACAGGTTGAAT	MIMAT0000674	chr8	86702809	86702792	+	0
mmu-miR-181d-3p	12.5522	3.64987	12.5522	up	8.21113	14.2993	3.90784	0.257974	Detected	Detected	TGACATTCATCCCCCG	MIMAT0017264	chr8	86702682	86702668	+	0
mmu-miR-181d-5p	-3.4929	-1.80443	3.4929	down	73.4738	835.555	7.08548	8.8899	Detected	Detected	ACCCACCGACAACAATG	MIMAT0004324	chr8	86702643	86702628	+	0
mmu-miR-182-3p	1.63844	0.712327	1.63844	up	0.1	0.1	-2.60961	-3.32194	Not Detected	Not Detected	AGTTGGCAAGTCTAGAAC	MIMAT0016995	chr6	30115987	30115971	+	0
mmu-miR-182-5p	-4.47973	-2.16341	4.47973	down	298.344	4312.82	9.02131	11.1847	Detected	Detected	CGGTGTGAGTTCTACC	MIMAT0000211	chr6	30115948	30115934	+	0
mmu-miR-183-3p	-3.65406	-1.8695	3.65406	down	21.7958	278.529	5.37346	7.24296	Detected	Detected	TTATGGCCCTTCGGT	MIMAT0004539	chr6	30119733	30119720	+	0
mmu-miR-183-5p	-3.97187	-1.98982	3.97187	down	478.046	5639.3	9.59536	11.5852	Detected	Detected	AGTGAATTCTACCAGTGCC	MIMAT0000212	chr6	30119694	30119677	+	0
mmu-miR-1839-3p	-32.3572	-5.01602	32.3572	down	3.69323	494.59	3.01278	8.02879	Detected	Detected	GCTGTTGGTAGATAAGTAG	MIMAT0009457					0
mmu-miR-1839-5p	-2.88463	-1.52838	2.88463	down	31.081	311.26	5.89073	7.41911	Detected	Detected	CAAGACCTGTTCTATCTAC	MIMAT0009456					0
mmu-miR-184-3p	1.50754	0.592195	1.50754	up	51.1002	122.552	6.59678	6.00459	Detected	Detected	ACCCTTATCAGTTCTCCGTCCA	MIMAT0000213	chr9	89697163	89697143	+	0
mmu-miR-184-5p	1.63844	0.712327	1.63844	up	0.1	0.1	-2.60961	-3.32194	Not Detected	Not Detected	GCTGGCTGGAAAAGT	MIMAT0022690					0
mmu-miR-1843a-3p	1.63844	0.712327	1.63844	up	0.1	0.1	-2.60961	-3.32194	Not Detected	Not Detected	TGTATGGAGGTGAACGA	MIMAT0014806	chr12	81492662	81492647	+	0
mmu-miR-1843a-5p	-4.97904	-2.31587	4.97904	down	0.1	6.655	-2.60961	-0.293745	Not Detected	Detected	AGTCAGACAGAGACCTC	MIMAT0014805	chr12	81492623	81492608	+	0
mmu-miR-1843b-3p	1.87227	0.904787	1.87227	up	8.15448	17.443	3.89109	2.9863	Detected	Detected	GTATGGAGGGGAACG	MIMAT0019346					0
mmu-miR-1843b-5p	1.63844	0.712327	1.63844	up	0.1	0.1	-2.60961	-3.32194	Not Detected	Not Detected	AAGTCAGACAGAGACCT	MIMAT0019345					0
mmu-miR-185-3p	1.63844	0.712327	1.63844	up	0.1	0.1	-2.60961	-3.32194	Not Detected	Not Detected	ACCAGAGGAAAGCCAG	MIMAT0016996	chr16	18327554	18327540	+	0
mmu-miR-185-5p	1.11863	0.161736	1.11863	up	198.04	573.502	8.4897	8.32797	Detected	Detected	TCAGGAACTGCCTTTCT	MIMAT0000214	chr16	18327521	18327506	+	0
mmu-miR-186-3p	1.11945	0.162787	1.11945	up	4.04061	17.0164	3.11228	2.94949	Detected	Detected	CCCAAAAAATTCACCTTAGGGC	MIMAT0004540	chr3	157207289	157207309	-	0
mmu-miR-186-5p	4.40067	2.13772	4.40067	up	39.8942	32.0991	6.29471	4.15699	Detected	Detected	AGCCCAAAAGGAGAATTCTTT	MIMAT0000215	chr3	157207251	157207270	-	0
mmu-miR-187-3p	1.63844	0.712327	1.63844	up	0.1	0.1	-2.60961	-3.32194	Not Detected	Not Detected	CCGGCTGCAACACA	MIMAT0000216	chr18	24587671	24587659	+	0
mmu-miR-187-5p	-1.08306	-0.115109	1.08306	down	14.2759	53.3293	4.72962	4.84473	Detected	Detected	CCCGGGTCCTGTG	MIMAT0016997	chr18	24587634	24587623	+	0
mmu-miR-188-3p	-3.08189	-1.62382	3.08189	down	0.1	2.54972	-2.60961	-0.985795	Not Detected	Detected	TGCAAACCCTGCATGTG	MIMAT0004541					0
mmu-miR-188-5p	7.57726	2.92168	7.57726	up	2788.16	1165.05	12.3343	9.4126	Detected	Detected	CCCTCCACCATGC	MIMAT0000217					0
mmu-miR-1892	2.03165	1.02265	2.03165	up	1236.22	1707.12	11.0834	10.0608	Detected	Detected	ATCCTCCCTCCCGT	MIMAT0007871					0
mmu-miR-1893	78.5946	6.29636	78.5946	up	3.55657	0.1	2.97442	-3.32194	Detected	Not Detected	CGAGGCGTCCAGC	MIMAT0007879					0
mmu-miR-1894-3p	6.77993	2.76127	6.77993	up	579.839	266.18	9.93761	7.17634	Detected	Detected	CTCCCTTCACCCTCT	MIMAT0007878					0
mmu-miR-1894-5p	1.63844	0.712327	1.63844	up	0.1	0.1	-2.60961	-3.32194	Not Detected	Not Detected	AGAGGCAGGTGGTAGG	MIMAT0007877					0
mmu-miR-1895	5.46383	2.44991	5.46383	up	1975.28	1108.06	11.8091	9.35918	Detected	Detected	TCCTCCTCGTCCTCC	MIMAT0007867					0
mmu-miR-1896	-3.45733	-1.78966	3.45733	down	82.5619	911.063	7.24673	9.03639	Detected	Detected	CTCCTCACCCACCA	MIMAT0007873					0
mmu-miR-1897-3p	1.44373	0.529802	1.44373	up	95.0101	212.197	7.42783	6.89803	Detected	Detected	CTCACCGGACAGAAC	MIMAT0007865					0
mmu-miR-1897-5p	1.82909	0.871124	1.82909	up	755.74	1102.38	10.2152	9.34404	Detected	Detected	CCCCCTCTTTCTCCA	MIMAT0007864					0
mmu-miR-1898	1.63844	0.712327	1.63844	up	0.1	0.1	-2.60961	-3.32194	Not Detected	Not Detected	GATCCCCTGTGAACC	MIMAT0007875					0
mmu-miR-1899	1.63844	0.712327	1.63844	up	0.1	0.1	-2.60961	-3.32194	Not Detected	Not Detected	GGAAGCAGATTCGGC	MIMAT0007869					0
mmu-miR-18a-3p	-107.468	-6.74776	107.468	down	0.1	31.4832	-2.60961	4.13815	Not Detected	Detected	CAGAAGGAGCACTTAGGGC	MIMAT0004626	chr14	115443134	115443151	-	0
mmu-miR-18a-5p	-2.52431	-1.33589	2.52431	down	921.984	6959.3	10.5881	11.9239	Detected	Detected	CTATCTGCACTAGATGCAC	MIMAT0000528	chr14	115443094	115443111	-	0
mmu-miR-18b-3p	-1.70607	-0.77068	1.70607	down	10.8935	63.7563	4.30658	5.07726	Detected	Detected	AGAAGGGGCATTTAGGG	MIMAT0017270	chrX	50095579	50095564	+	0
mmu-miR-18b-5p	-2926.13	-11.5148	2926.13	down	0.1	849.203	-2.60961	8.90516	Not Detected	Detected	CTAACAGCACTAGATGCAC	MIMAT0004858	chrX	50095540	50095523	+	0
mmu-miR-1900	1.63844	0.712327	1.63844	up	0.1	0.1	-2.60961	-3.32194	Not Detected	Not Detected	TGAAGGACCAGAGAGG	MIMAT0007870					0
mmu-miR-1901	3.30208	1.72338	3.30208	up	45.0858	49.3071	6.453	4.72962	Detected	Detected	GGACCCCCGGGA	MIMAT0007880					0
mmu-miR-1902	1.63844	0.712327	1.63844	up	0.1	0.1	-2.60961	-3.32194	Not Detected	Not Detected	AAGTCATGCCTACTGCA	MIMAT0007863					0
mmu-miR-1903	1.63844	0.712327	1.63844	up	0.1	0.1	-2.60961	-3.32194	Not Detected	Not Detected	TGTCTCAGGAAGAAGAAG	MIMAT0007868					0
mmu-miR-1904	1.12197	0.166031	1.12197	up	302.622	822.891	9.03639	8.87036	Detected	Detected	CCTCCCTCCAGAGG	MIMAT0007874					0
mmu-miR-1905	97.0355	6.60044	97.0355	up	4.73065	0.1	3.2785	-3.32194	Detected	Not Detected	CTACCGCGTGGTGG	MIMAT0007866					0
mmu-miR-1906	-1.93613	-0.953173	1.93613	down	87.7708	547.469	7.31092	8.26409	Detected	Detected	AGCCCTGCCTCAGG	MIMAT0007872					0
mmu-miR-1907	-2.0157	-1.01128	2.0157	down	27.4013	193.368	5.71383	6.72511	Detected	Detected	ACCTCCAGATCCTCTG	MIMAT0007876					0
mmu-miR-190a-3p	1.63844	0.712327	1.63844	up	0.1	0.1	-2.60961	-3.32194	Not Detected	Not Detected	AGGAATATGCTTGATATATAGT	MIMAT0016998	chr9	67084529	67084508	+	0
mmu-miR-190a-5p	1.63844	0.712327	1.63844	up	0.1	0.1	-2.60961	-3.32194	Not Detected	Not Detected	ACCTAATATATCAAACATATCA	MIMAT0000220	chr9	67084493	67084472	+	0
mmu-miR-190b-3p	1.63844	0.712327	1.63844	up	0.1	0.1	-2.60961	-3.32194	Not Detected	Not Detected	TGAGAGTATGCTTGACATT	MIMAT0017267	chr3	89873994	89874011	-	0
mmu-miR-190b-5p	1.63844	0.712327	1.63844	up	0.1	0.1	-2.60961	-3.32194	Not Detected	Not Detected	AACCCAATATCAAACATATCA	MIMAT0004852	chr3	89873953	89873972	-	0
mmu-miR-191-3p	1.05754	0.0807142	1.05754	up	14.0694	45.2813	4.70801	4.62729	Detected	Detected	GGGAACGAAATCCAAGTGCAG	MIMAT0004542	chr9	108470700	108470719	-	0
mmu-miR-191-5p	-4.51736	-2.17548	4.51736	down	0.1	5.47806	-2.60961	-0.434132	Not Detected	Detected	CAGCTGCTTTTGGGA	MIMAT0000221	chr9	108470665	108470678	-	0
mmu-miR-1912-3p	1.63844	0.712327	1.63844	up	0.1	0.1	-2.60961	-3.32194	Not Detected	Not Detected	AGTTCTCACTGCATGTTC	MIMAT0014958	chrX	143444041	143444057	-	0
mmu-miR-1912-5p	1.63844	0.712327	1.63844	up	0.1	0.1	-2.60961	-3.32194	Not Detected	Not Detected	TACACAGCCCATGCAA	MIMAT0014957	chrX	143444006	143444020	-	0
mmu-miR-192-3p	176.08	7.46009	176.08	up	9.84772	0.1	4.13815	-3.32194	Detected	Not Detected	CTGTGACCTATGGAATTG	MIMAT0017012	chr19	6264905	6264921	-	0
mmu-miR-192-5p	18.2284	4.18811	18.2284	up	5366.67	1240.44	13.743	9.55493	Detected	Detected	GGCTGTCAATTCATAGGTC	MIMAT0000517	chr19	6264860	6264877	-	0
mmu-miR-1927	-31.8017	-4.99103	31.8017	down	0.1	15.18	-2.60961	2.38142	Not Detected	Detected	TCAGTCCCTAACATCCA	MIMAT0009390					0
mmu-miR-1928	1.63844	0.712327	1.63844	up	0.1	0.1	-2.60961	-3.32194	Not Detected	Not Detected	GAGCTGGCAATGTAGC	MIMAT0009391					0
mmu-miR-1929-3p	-55.1483	-5.78524	55.1483	down	0.1	19.004	-2.60961	3.17563	Not Detected	Detected	CCACCTAGGTCTCCA	MIMAT0022729					0
mmu-miR-1929-5p	1.22811	0.296434	1.22811	up	7.5871	21.836	3.80384	3.50741	Detected	Detected	CTCTGCTCTATAAAGTCCT	MIMAT0009392	chr10	44079503	44079520	-	0
mmu-miR-1930-3p	-351.131	-8.45587	351.131	down	0.1	109.296	-2.60961	5.84625	Not Detected	Detected	CCACAGCCACAGTAA	MIMAT0017340	chr10	77104027	77104040	-	0
mmu-miR-1930-5p	1.63844	0.712327	1.63844	up	0.1	0.1	-2.60961	-3.32194	Not Detected	Not Detected	ACGCTGCAGGTACTATG	MIMAT0009393	chr10	77103987	77104002	-	0
mmu-miR-1931	-2.30029	-1.20182	2.30029	down	10.5574	82.5698	4.23623	5.43805	Detected	Detected	GCCATCGCACCAGC	MIMAT0009394					0
mmu-miR-1932	19.1101	4.25626	19.1101	up	11.7928	12.7252	4.4301	0.173842	Detected	Detected	CCGACCTAGCGCT	MIMAT0009395					0
mmu-miR-1933-3p	1.63844	0.712327	1.63844	up	0.1	0.1	-2.60961	-3.32194	Not Detected	Not Detected	ATAGTCACACTGATGGTC	MIMAT0009397					0
mmu-miR-1933-5p	1.63844	0.712327	1.63844	up	0.1	0.1	-2.60961	-3.32194	Not Detected	Not Detected	AAACTAAGACCGAACACC	MIMAT0009396					0
mmu-miR-1934-3p	-1.92203	-0.94263	1.92203	down	103.867	679.103	7.61661	8.55924	Detected	Detected	TCACCAGCCCCACC	MIMAT0017341	chr11	69476603	69476615	-	0
mmu-miR-1934-5p	1.63844	0.712327	1.63844	up	0.1	0.1	-2.60961	-3.32194	Not Detected	Not Detected	AGAGGACGAAGCAGG	MIMAT0009398	chr11	69476566	69476579	-	0
mmu-miR-1936	1.63844	0.712327	1.63844	up	0.1	0.1	-2.60961	-3.32194	Not Detected	Not Detected	GCCAGTTCACAGCAG	MIMAT0009400					0
mmu-miR-1938	1.63844	0.712327	1.63844	up	0.1	0.1	-2.60961	-3.32194	Not Detected	Not Detected	GACCGAACTACAAGTCC	MIMAT0009402					0
mmu-miR-193a-3p	-1.03459	-0.0490651	1.03459	down	99.443	338.669	7.48608	7.53515	Detected	Detected	ACTGGGACTTTGTAGGC	MIMAT0000223	chr11	79525516	79525532	-	0
mmu-miR-193a-5p	4.21551	2.07571	4.21551	up	1.4407	12.0262	2.2088	0.133092	Detected	Detected	TCATCTTGCCCGCA	MIMAT0004544	chr11	79525485	79525498	-	0
mmu-miR-193b-3p	3.77131	1.91507	3.77131	up	247.101	212.098	8.80721	6.89215	Detected	Detected	AGCGGGACTTTGTGGGC	MIMAT0004859	chr16	13449669	13449684	-	0
mmu-miR-193b-5p	-2.03116	-1.0223	2.03116	down	11.9318	86.0314	4.45244	5.47474	Detected	Detected	TCATCTCGCCCTCAA	MIMAT0017271	chr16	13449634	13449647	-	0
mmu-miR-194-1-3p	2265.02	11.1453	2265.02	up	118.63	0.1	7.82337	-3.32194	Detected	Not Detected	GAAGTAACAGCAGCTCC	MIMAT0016999	chr1	187137245	187137260	-	0
mmu-miR-194-2-3p	-4.46537	-2.15878	4.46537	down	0.1	5.35269	-2.60961	-0.450832	Not Detected	Detected	CAGATAACAGCAGCCC	MIMAT0017073	chr19	6264701	6264715	-	0
mmu-miR-194-5p	12.9438	3.69419	12.9438	up	1250.8	315.027	11.1406	7.44639	Detected	Detected	TCCACATGGAGTTGCT	MIMAT0000224	chr1	187137210	187137225	-	0
mmu-miR-1941-3p	1.63844	0.712327	1.63844	up	0.1	0.1	-2.60961	-3.32194	Not Detected	Not Detected	ATGGGAGATACTGCTAAGA	MIMAT0009406					0
mmu-miR-1941-5p	40.5423	5.34136	40.5423	up	14.5678	4.45881	4.75872	-0.582635	Detected	Detected	AAGCCTCTGTACCAGC	MIMAT0009405					0
mmu-miR-1942	1.63844	0.712327	1.63844	up	0.1	0.1	-2.60961	-3.32194	Not Detected	Not Detected	CAACCAGATGAAGACATC	MIMAT0009407					0
mmu-miR-1943-3p	1.63844	0.712327	1.63844	up	0.1	0.1	-2.60961	-3.32194	Not Detected	Not Detected	GAAGGGAGGAGCTGG	MIMAT0017342	chr15	79205722	79205709	+	0
mmu-miR-1943-5p	62.6299	5.96878	62.6299	up	29.2425	7.73109	5.78315	-0.185628	Detected	Detected	TCCAGGTGCCCAGA	MIMAT0009408	chr15	79205687	79205675	+	0
mmu-miR-1945	-1.27773	-0.353587	1.27773	down	21.4603	98.9338	5.33376	5.68735	Detected	Detected	GTCCCGACAGTACCC	MIMAT0009410					0
mmu-miR-1946a	135.781	7.08513	135.781	up	7.35209	0.1	3.7632	-3.32194	Detected	Not Detected	AAAAGTGTGTGCCACC	MIMAT0009412					0
mmu-miR-1946b	1.63844	0.712327	1.63844	up	0.1	0.1	-2.60961	-3.32194	Not Detected	Not Detected	AAAAGCATGTGCCACC	MIMAT0009443					0
mmu-miR-1947-3p	15.7622	3.97839	15.7622	up	9.98501	13.2492	4.18135	0.202955	Detected	Detected	GGAGGGAGAGCTAGC	MIMAT0017343	chr16	33105505	33105518	-	0
mmu-miR-1947-5p	1.63844	0.712327	1.63844	up	0.1	0.1	-2.60961	-3.32194	Not Detected	Not Detected	CAGCACTCAGCTAGC	MIMAT0009413	chr16	33105469	33105482	-	0
mmu-miR-1948-3p	1.63844	0.712327	1.63844	up	0.1	0.1	-2.60961	-3.32194	Not Detected	Not Detected	CTGTACGAGTGCTCTG	MIMAT0009415	chr18	12873378	12873392	-	0
mmu-miR-1948-5p	1.63844	0.712327	1.63844	up	0.1	0.1	-2.60961	-3.32194	Not Detected	Not Detected	ATTTAGGCAGAATACTCATAT	MIMAT0017344	chr18	12873335	12873354	-	0
mmu-miR-1949	-26.4388	-4.72459	26.4388	down	18.2267	1563.56	5.10286	9.82745	Detected	Detected	AACTATGCTGACATCCTG	MIMAT0009416					0
mmu-miR-1950	1.63844	0.712327	1.63844	up	0.1	0.1	-2.60961	-3.32194	Not Detected	Not Detected	TGACCATATCCTTAGATGC	MIMAT0009417					0
mmu-miR-1951	1.63844	0.712327	1.63844	up	0.1	0.1	-2.60961	-3.32194	Not Detected	Not Detected	TAGCCACACCAGTCTC	MIMAT0009422					0
mmu-miR-1952	1.63844	0.712327	1.63844	up	0.1	0.1	-2.60961	-3.32194	Not Detected	Not Detected	CAGAAGGAGGGTGGA	MIMAT0009423					0
mmu-miR-1953	1.63844	0.712327	1.63844	up	0.1	0.1	-2.60961	-3.32194	Not Detected	Not Detected	CAGAAGCCTGAGAACT	MIMAT0009424					0
mmu-miR-1954	1.63844	0.712327	1.63844	up	0.1	0.1	-2.60961	-3.32194	Not Detected	Not Detected	AACAGGGTCTCACTCTG	MIMAT0009425					0
mmu-miR-1955-3p	1.63844	0.712327	1.63844	up	0.1	0.1	-2.60961	-3.32194	Not Detected	Not Detected	ATGTCCCAGCATGCA	MIMAT0017348					0
mmu-miR-1955-5p	1.63844	0.712327	1.63844	up	0.1	0.1	-2.60961	-3.32194	Not Detected	Not Detected	AAAAGCTGCAGTGCATC	MIMAT0009426	chr2	92032160	92032175	-	0
mmu-miR-1956	-30.4174	-4.92682	30.4174	down	0.1	15.1154	-2.60961	2.31721	Not Detected	Detected	TCCGCTGACTCAGC	MIMAT0009428					0
mmu-miR-1957a	30.9465	4.95171	30.9465	up	9.91438	3.32303	4.15699	-0.794714	Detected	Detected	GTCATATGCTCTACCACT	MIMAT0009430	chr4	118802399	118802415	-	0
mmu-miR-1957b	1.63844	0.712327	1.63844	up	0.1	0.1	-2.60961	-3.32194	Not Detected	Not Detected	ATACCACTGAGTTACATTCC	MIMAT0025145					0
mmu-miR-1958	1.63844	0.712327	1.63844	up	0.1	0.1	-2.60961	-3.32194	Not Detected	Not Detected	ACTTACTGCTTCCACTTT	MIMAT0009431					0
mmu-miR-195a-3p	-81.8916	-6.35564	81.8916	down	0.1	24.9465	-2.60961	3.74603	Not Detected	Detected	GGAGCAGCACAGCC	MIMAT0017000	chr11	70048610	70048623	-	0
mmu-miR-195a-5p	-10.7599	-3.42759	10.7599	down	61.6354	1869.69	6.78757	10.2152	Detected	Detected	GCCAATATTTCTGTGCTGC	MIMAT0000225	chr11	70048566	70048584	-	0
mmu-miR-195b	1.63844	0.712327	1.63844	up	0.1	0.1	-2.60961	-3.32194	Not Detected	Not Detected	TTCTACTATTTCTGTGCTGC	MIMAT0025076					0
mmu-miR-1960	3.33119	1.73604	3.33119	up	25.4854	26.9079	5.62409	3.88805	Detected	Detected	AGCCCTCTTCTAACAGC	MIMAT0009433					0
mmu-miR-1961	1.63844	0.712327	1.63844	up	0.1	0.1	-2.60961	-3.32194	Not Detected	Not Detected	TTCTAACTACTACCTCA	MIMAT0009434					0
mmu-miR-1962	-4.66597	-2.22218	4.66597	down	0.1	5.84441	-2.60961	-0.387435	Not Detected	Detected	ATGTGTCCCAGTGCC	MIMAT0009435					0
mmu-miR-1963	1.63844	0.712327	1.63844	up	0.1	0.1	-2.60961	-3.32194	Not Detected	Not Detected	GAAGGCCTCATGATCTC	MIMAT0009436					0
mmu-miR-1964-3p	7.92994	2.98731	7.92994	up	3.7664	10.7025	3.03628	0.0489719	Detected	Detected	AAAGCCGGAGCCCA	MIMAT0009437	chr7	30558372	30558384	-	0
mmu-miR-1964-5p	-6.24064	-2.64169	6.24064	down	0.1	10.4548	-2.60961	0.0320827	Not Detected	Detected	CACCGGCTTTTGTGC	MIMAT0017349					0
mmu-miR-1966-3p	1.63844	0.712327	1.63844	up	0.1	0.1	-2.60961	-3.32194	Not Detected	Not Detected	CTAAGGGAGAGTTGAGT	MIMAT0022952					0
mmu-miR-1966-5p	1.90318	0.928414	1.90318	up	79.2092	148.966	7.18824	6.25982	Detected	Detected	GACTCTCTCCTGAGCC	MIMAT0009439	chr8	108139391	108139405	-	0
mmu-miR-1967	-1.50402	-0.588824	1.50402	down	19.9299	105.732	5.21741	5.80623	Detected	Detected	GCATCTTCTCCCCAG	MIMAT0009440					0
mmu-miR-1968-3p	1.63844	0.712327	1.63844	up	0.1	0.1	-2.60961	-3.32194	Not Detected	Not Detected	CTTAACAGCTGCAGAGG	MIMAT0017350	chr8	13189094	13189079	+	0
mmu-miR-1968-5p	-116.023	-6.85826	116.023	down	0.1	34.1008	-2.60961	4.24865	Not Detected	Detected	AGTCCACCATCCTTAAC	MIMAT0009441	chr8	13189061	13189046	+	0
mmu-miR-1969	-188.276	-7.55671	188.276	down	0.1	58.3636	-2.60961	4.9471	Not Detected	Detected	ACCCATGTTAAAGTCTCC	MIMAT0009442					0
mmu-miR-196a-1-3p	-4.36305	-2.12534	4.36305	down	0.1	5.11019	-2.60961	-0.484276	Not Detected	Detected	ATCAGGTGGTTTGATGTC	MIMAT0017013	chr11	96126544	96126560	-	0
mmu-miR-196a-2-3p	1.63844	0.712327	1.63844	up	0.1	0.1	-2.60961	-3.32194	Not Detected	Not Detected	TCAGGCAGTTTCTTGT	MIMAT0004618	chr15	102803838	102803853	-	0
mmu-miR-196a-5p	-61.7351	-5.94802	61.7351	down	4.92109	1036.14	3.33995	9.28797	Detected	Detected	CCCAACAACATGAAACTACCTA	MIMAT0000518	chr11	96126501	96126522	-	0
mmu-miR-196b-3p	1.63844	0.712327	1.63844	up	0.1	0.1	-2.60961	-3.32194	Not Detected	Not Detected	GAAGGCAGTGTCGTG	MIMAT0017170	chr6	52180151	52180138	+	0
mmu-miR-196b-5p	1.13351	0.180796	1.13351	up	42.6109	139.868	6.35374	6.17295	Detected	Detected	CCCAACAACAGGAAACTACC	MIMAT0001081	chr6	52180116	52180098	+	0
mmu-miR-1970	-37.8605	-5.24262	37.8605	down	0.1	15.6417	-2.60961	2.63301	Not Detected	Detected	CAAAGCCTATCCCCAG	MIMAT0009444					0
mmu-miR-1971	-13.14	-3.71589	13.14	down	10.5929	474.956	4.24467	7.96056	Detected	Detected	TCTCAGCCCAGCCT	MIMAT0009446					0
mmu-miR-1981-3p	1.63844	0.712327	1.63844	up	0.1	0.1	-2.60961	-3.32194	Not Detected	Not Detected	GTCAAAGGCCAGGG	MIMAT0017351	chr1	186646365	186646353	+	0
mmu-miR-1981-5p	1.18268	0.242065	1.18268	up	5.70701	19.3813	3.47025	3.22818	Detected	Detected	GCCACGTCTAAGCC	MIMAT0009458	chr1	186646309	186646297	+	0
mmu-miR-1982-3p	1.63844	0.712327	1.63844	up	0.1	0.1	-2.60961	-3.32194	Not Detected	Not Detected	CTGTGGGAGAACATAGG	MIMAT0009460	chr10	80291599	80291615	-	0
mmu-miR-1982-5p	-1.325	-0.405995	1.325	down	182.739	805.429	8.39174	8.79774	Detected	Detected	CCTCCCCAGGACC	MIMAT0009459	chr10	80291561	80291572	-	0
mmu-miR-1983	-165.23	-7.36833	165.23	down	0.1	50.3085	-2.60961	4.75872	Not Detected	Detected	AGAAAACATGCTCCAGG	MIMAT0009455					0
mmu-miR-199a-3p	-484.894	-8.92152	484.894	down	0.1	155.592	-2.60961	6.31191	Not Detected	Detected	TAACCAATGTGCAGACTACT	MIMAT0000230	chr2	32174047	32174065	-	0
mmu-miR-199a-5p	-60.1741	-5.91107	60.1741	down	0.1	19.9906	-2.60961	3.30146	Not Detected	Detected	GAACAGGTAGTCTGAACAC	MIMAT0000229					0
mmu-miR-199b-5p	-215.846	-7.75386	215.846	down	0.1	66.624	-2.60961	5.14424	Not Detected	Detected	GAACAGGTAGTCTAAACACTGG	MIMAT0000672	chr2	32174007	32174027	-	0
mmu-miR-19a-3p	-4.41646	-2.14289	4.41646	down	421.485	5768.97	9.46785	11.6107	Detected	Detected	TCAGTTTTGCATAGATTTGCA	MIMAT0000651	chr14	115443273	115443292	-	0
mmu-miR-19a-5p	-3.34395	-1.74155	3.34395	down	0.1	3.00176	-2.60961	-0.86806	Not Detected	Detected	GTAGTGCAACTATGCAAAAC	MIMAT0004660	chr14	115443237	115443255	-	0
mmu-miR-19b-1-5p	1.63844	0.712327	1.63844	up	0.1	0.1	-2.60961	-3.32194	Not Detected	Not Detected	GCTGGATGCAAACCT	MIMAT0017065	chr14	115443551	115443564	-	0
mmu-miR-19b-2-5p	1.63844	0.712327	1.63844	up	0.1	0.1	-2.60961	-3.32194	Not Detected	Not Detected	GCTGAACTGCAAATCTG	MIMAT0017010	chrX	50095193	50095178	+	0
mmu-miR-19b-3p	-2.3089	-1.20721	2.3089	down	2993.06	35029.2	12.5358	13.743	Detected	Detected	TCAGTTTTGCATGGATTTGC	MIMAT0000513	chr14	115443583	115443602	-	0
mmu-miR-1a-1-5p	1.63844	0.712327	1.63844	up	0.1	0.1	-2.60961	-3.32194	Not Detected	Not Detected	TATGGGCATATAAAGAAGTATG	MIMAT0016979	chr2	180123763	180123784	-	0
mmu-miR-1a-2-5p	1.63844	0.712327	1.63844	up	0.1	0.1	-2.60961	-3.32194	Not Detected	Not Detected	TATGGGTACATAAAGAAGTATG	MIMAT0017047	chr18	10785508	10785487	+	0
mmu-miR-1a-3p	-4.58371	-2.19651	4.58371	down	0.1	5.64015	-2.60961	-0.413097	Not Detected	Detected	ATACATACTTCTTTACATTCC	MIMAT0000123	chr2	180123802	180123822	-	0
mmu-miR-1b-3p	1.63844	0.712327	1.63844	up	0.1	0.1	-2.60961	-3.32194	Not Detected	Not Detected	GCACATACTTCTTTATGTAC	MIMAT0017326	chr18	10785527	10785545	-	0
mmu-miR-1b-5p	1.63844	0.712327	1.63844	up	0.1	0.1	-2.60961	-3.32194	Not Detected	Not Detected	TGGAATGTAAAGAAGTATGTA	MIMAT0005835	chr18	10785484	10785504	-	0
mmu-miR-200a-3p	-2.77522	-1.4726	2.77522	down	3.38295	38.3346	2.91522	4.38782	Detected	Detected	ACATCGTTACCAGACAGT	MIMAT0000519	chr4	155429079	155429063	+	0
mmu-miR-200a-5p	149.669	7.22563	149.669	up	99.8405	14.7503	7.506	0.280374	Detected	Detected	TCCAGCACTGTCCGGT	MIMAT0004619	chr4	155429041	155429027	+	0
mmu-miR-200b-3p	-3.298	-1.72159	3.298	down	24.3614	280.815	5.5574	7.27899	Detected	Detected	TCATCATTACCAGGCAG	MIMAT0000233	chr4	155429855	155429840	+	0
mmu-miR-200b-5p	1.66023	0.731385	1.66023	up	12.2729	25.076	4.49458	3.7632	Detected	Detected	TCCAATGCTGCCCAG	MIMAT0004545	chr4	155429819	155429806	+	0
mmu-miR-200c-3p	-63.4458	-5.98745	63.4458	down	4.58372	991.339	3.24411	9.23156	Detected	Detected	TCCATCATTACCCGGC	MIMAT0000657	chr6	124668406	124668392	+	0
mmu-miR-200c-5p	1.63844	0.712327	1.63844	up	0.1	0.1	-2.60961	-3.32194	Not Detected	Not Detected	CCAAACACTGCTGGGTA	MIMAT0004663	chr6	124668365	124668350	+	0
mmu-miR-201-3p	1.63844	0.712327	1.63844	up	0.1	0.1	-2.60961	-3.32194	Not Detected	Not Detected	CCTACACAGAAAGGCA	MIMAT0017001	chrX	65241333	65241319	+	0
mmu-miR-201-5p	1.63844	0.712327	1.63844	up	0.1	0.1	-2.60961	-3.32194	Not Detected	Not Detected	AAGAACAATGCCTTACTGAGTA	MIMAT0000234	chrX	65241297	65241277	+	0
mmu-miR-202-3p	-1.24427	-0.315304	1.24427	down	153.687	638.857	8.12475	8.44005	Detected	Detected	TCTTCCCATGCGCTA	MIMAT0000235					0
mmu-miR-202-5p	1.63844	0.712327	1.63844	up	0.1	0.1	-2.60961	-3.32194	Not Detected	Not Detected	AAAGAAGTATATGCATAGGAA	MIMAT0004546					0
mmu-miR-203-3p	-50.7413	-5.66509	50.7413	down	0.1	18.0797	-2.60961	3.05548	Not Detected	Detected	CTAGTGGTCCTAAACATT	MIMAT0000236	chr12	113369143	113369159	-	0
mmu-miR-203-5p	1.63844	0.712327	1.63844	up	0.1	0.1	-2.60961	-3.32194	Not Detected	Not Detected	TGTTGAACTGTCAAGAACCAC	MIMAT0004547	chr12	113369102	113369121	-	0
mmu-miR-204-3p	-1.04108	-0.058075	1.04108	down	3.10808	16.5681	2.82898	2.88705	Detected	Detected	ACGTCCCTTTGCCTT	MIMAT0017002	chr19	22825146	22825159	-	0
mmu-miR-204-5p	-6.22097	-2.63714	6.22097	down	0.1	10.389	-2.60961	0.0275284	Not Detected	Detected	AGGCATAGGATGACAAAGGG	MIMAT0000237	chr19	22825103	22825121	-	0
mmu-miR-205-3p	1.63844	0.712327	1.63844	up	0.1	0.1	-2.60961	-3.32194	Not Detected	Not Detected	TGAGCTTCACTCCACT	MIMAT0017003	chr1	195333720	195333706	+	0
mmu-miR-205-5p	-298.267	-8.22046	298.267	down	0.1	94.007	-2.60961	5.61085	Not Detected	Detected	CAGACTCCGGTGGAAT	MIMAT0000238	chr1	195333684	195333670	+	0
mmu-miR-206-3p	16.2524	4.02259	16.2524	up	10.809	14.2031	4.27569	0.2531	Detected	Detected	CCACACACTTCCTTAC	MIMAT0000239	chr1	20669143	20669157	-	0
mmu-miR-206-5p	1.63844	0.712327	1.63844	up	0.1	0.1	-2.60961	-3.32194	Not Detected	Not Detected	TATGAGGATATAAAGAAGCATG	MIMAT0017004	chr1	20669100	20669120	-	0
mmu-miR-207	-5.06571	-2.34077	5.06571	down	0.1	6.88871	-2.60961	-0.268847	Not Detected	Detected	GAGGGAGGAGAGCCAG	MIMAT0000240					0
mmu-miR-208a-3p	1.63844	0.712327	1.63844	up	0.1	0.1	-2.60961	-3.32194	Not Detected	Not Detected	ACAAGCTTTTTGCTCGTCT	MIMAT0000520	chr14	55567967	55567950	+	0
mmu-miR-208a-5p	1.19185	0.253206	1.19185	up	21.2185	62.7102	5.31466	5.06145	Detected	Detected	GTATAACCCGGGCCA	MIMAT0017014					0
mmu-miR-208b-3p	1.63844	0.712327	1.63844	up	0.1	0.1	-2.60961	-3.32194	Not Detected	Not Detected	ACAAACCTTTTGTTCGTCTTA	MIMAT0004939	chr14	55594603	55594584	+	0
mmu-miR-208b-5p	1.63844	0.712327	1.63844	up	0.1	0.1	-2.60961	-3.32194	Not Detected	Not Detected	ACATAACGCGAGCAAA	MIMAT0017280	chr14	55594568	55594554	+	0
mmu-miR-20a-3p	-3.44854	-1.78598	3.44854	down	5.09131	67.7287	3.37351	5.15949	Detected	Detected	CTTTAAGTGCTCGTAATGCA	MIMAT0004627	chr14	115443444	115443462	-	0
mmu-miR-20a-5p	-1.52519	-0.60899	1.52519	down	5083.12	47349.1	13.5466	14.1556	Detected	Detected	CTACCTGCACTATAAGCAC	MIMAT0000529	chr14	115443410	115443427	-	0
mmu-miR-20b-3p	-346.26	-8.43571	346.26	down	0.1	107.47	-2.60961	5.8261	Not Detected	Detected	CTAGAAGTGCTCACACTG	MIMAT0004788	chrX	50095360	50095344	+	0
mmu-miR-20b-5p	-9.51709	-3.25052	9.51709	down	1238.89	60138	11.0927	14.3432	Detected	Detected	CTACCTGCACTATGAGCACT	MIMAT0003187	chrX	50095323	50095305	+	0
mmu-miR-210-3p	1.30542	0.38451	1.30542	up	2499.42	6393.57	12.1746	11.7901	Detected	Detected	TCAGCCGCTGTCACAC	MIMAT0000658	chr7	148407369	148407355	+	0
mmu-miR-210-5p	-3.63218	-1.86084	3.63218	down	0.1	3.54154	-2.60961	-0.748776	Not Detected	Detected	CAGTGTGCGGTGG	MIMAT0017052	chr7	148407331	148407320	+	0
mmu-miR-211-3p	-1.71429	-0.777607	1.71429	down	1570.4	8884.48	11.4716	12.2492	Detected	Detected	GCCCCCCTTTGCT	MIMAT0017059	chr7	71350763	71350774	-	0
mmu-miR-211-5p	-46.3887	-5.5357	46.3887	down	0.1	16.9262	-2.60961	2.92609	Not Detected	Detected	AGGCAAAGGATGACAAAGGGAA	MIMAT0000668	chr7	71350718	71350738	-	0
mmu-miR-212-3p	2.23476	1.16012	2.23476	up	152.328	221.649	8.11762	6.9575	Detected	Detected	TGGCCGTGACTGGA	MIMAT0000659	chr11	74986954	74986966	-	0
mmu-miR-212-5p	1.63844	0.712327	1.63844	up	0.1	0.1	-2.60961	-3.32194	Not Detected	Not Detected	AGTAAGCAGTCTAGAGCC	MIMAT0017053					0
mmu-miR-2136	1.63844	0.712327	1.63844	up	0.1	0.1	-2.60961	-3.32194	Not Detected	Not Detected	CACATCTCAGTCAACAC	MIMAT0011212					0
mmu-miR-2137	9.27687	3.21364	9.27687	up	11576.5	5155.55	14.6913	11.4776	Detected	Detected	CTCCCTGGGGCTC	MIMAT0011213					0
mmu-miR-2139	1.63844	0.712327	1.63844	up	0.1	0.1	-2.60961	-3.32194	Not Detected	Not Detected	GCAGTTACCAGGAGC	MIMAT0011215					0
mmu-miR-214-3p	-90.652	-6.50227	90.652	down	0.1	27.0381	-2.60961	3.89266	Not Detected	Detected	ACTGCCTGTCTGT	MIMAT0000661	chr1	164153579	164153590	-	0
mmu-miR-214-5p	1.63844	0.712327	1.63844	up	0.1	0.1	-2.60961	-3.32194	Not Detected	Not Detected	GCACAGCAAGTGTAGAC	MIMAT0004664	chr1	164153534	164153549	-	0
mmu-miR-215-3p	1.63844	0.712327	1.63844	up	0.1	0.1	-2.60961	-3.32194	Not Detected	Not Detected	ATTGGCCTACAGAATGAC	MIMAT0017169	chr1	187137530	187137546	-	0
mmu-miR-215-5p	1.63844	0.712327	1.63844	up	0.1	0.1	-2.60961	-3.32194	Not Detected	Not Detected	GTCTGTCAAATCATAGGT	MIMAT0000904	chr1	187137493	187137509	-	0
mmu-miR-216a-3p	1.63844	0.712327	1.63844	up	0.1	0.1	-2.60961	-3.32194	Not Detected	Not Detected	CATAATCCCAGAGACCA	MIMAT0017054	chr11	28657064	28657079	-	0
mmu-miR-216a-5p	1.63844	0.712327	1.63844	up	0.1	0.1	-2.60961	-3.32194	Not Detected	Not Detected	TCACAGTTGCCAGCTG	MIMAT0000662	chr11	28657025	28657039	-	0
mmu-miR-216b-3p	1.63844	0.712327	1.63844	up	0.1	0.1	-2.60961	-3.32194	Not Detected	Not Detected	AAGAATCTCTACAGGTAAGT	MIMAT0017233	chr11	28646247	28646265	-	0
mmu-miR-216b-5p	1.63844	0.712327	1.63844	up	0.1	0.1	-2.60961	-3.32194	Not Detected	Not Detected	TCACATTTGCCTGCAG	MIMAT0003729	chr11	28646211	28646225	-	0
mmu-miR-216c-3p	1.63844	0.712327	1.63844	up	0.1	0.1	-2.60961	-3.32194	Not Detected	Not Detected	ACTGGGAAATCTCTGCA	MIMAT0029889					0
mmu-miR-216c-5p	1.63844	0.712327	1.63844	up	0.1	0.1	-2.60961	-3.32194	Not Detected	Not Detected	ACACTTACCTGTAGAGATTC	MIMAT0029888					0
mmu-miR-217-3p	1.63844	0.712327	1.63844	up	0.1	0.1	-2.60961	-3.32194	Not Detected	Not Detected	AGGCAATGCATTAGGAAC	MIMAT0017072	chr11	28663804	28663820	-	0
mmu-miR-217-5p	1094.23	10.0957	1094.23	up	60.9484	0.1	6.77376	-3.32194	Detected	Not Detected	TCCAGTCAGTTCCTG	MIMAT0000679	chr11	28663770	28663783	-	0
mmu-miR-218-1-3p	1.63844	0.712327	1.63844	up	0.1	0.1	-2.60961	-3.32194	Not Detected	Not Detected	GGTGCTTGACGGAACC	MIMAT0004665	chr5	48615251	48615265	-	0
mmu-miR-218-2-3p	1.63844	0.712327	1.63844	up	0.1	0.1	-2.60961	-3.32194	Not Detected	Not Detected	CGCGGTGCTTGACA	MIMAT0005444	chr11	35430393	35430405	-	0
mmu-miR-218-5p	-4.73805	-2.24429	4.73805	down	10.9627	178.643	4.31486	6.55915	Detected	Detected	ACATGGTTAGATCAAGCACA	MIMAT0000663	chr5	48615206	48615225	-	0
mmu-miR-2183	1.2816	0.357944	1.2816	up	8.33514	22.2225	3.92782	3.56988	Detected	Detected	AGGAGGTCAGGGGT	MIMAT0011287					0
mmu-miR-219a-1-3p	1.63844	0.712327	1.63844	up	0.1	0.1	-2.60961	-3.32194	Not Detected	Not Detected	CGGGACGTCCAGAC	MIMAT0017055	chr17	34162010	34161997	+	0
mmu-miR-219a-2-3p	-133.16	-7.05702	133.16	down	0.1	40.0399	-2.60961	4.44741	Not Detected	Detected	ACAGATGTCCAGCCACA	MIMAT0022841	chr2	29701233	29701217	+	0
mmu-miR-219a-5p	-1.52852	-0.612137	1.52852	down	39.9247	212.479	6.2989	6.91103	Detected	Detected	AGAATTGCGTTTGGACAATCA	MIMAT0000664	chr2	29701189	29701169	+	0
mmu-miR-219b-3p	1.63844	0.712327	1.63844	up	0.1	0.1	-2.60961	-3.32194	Not Detected	Not Detected	ACTGATTGTCCAAACGC	MIMAT0029807					0
mmu-miR-219b-5p	1.63844	0.712327	1.63844	up	0.1	0.1	-2.60961	-3.32194	Not Detected	Not Detected	CGAGAATTGTGGCTGG	MIMAT0029806					0
mmu-miR-219c-3p	1.63844	0.712327	1.63844	up	0.1	0.1	-2.60961	-3.32194	Not Detected	Not Detected	GATTGTCCAAACGCAA	MIMAT0029893					0
mmu-miR-219c-5p	1.63844	0.712327	1.63844	up	0.1	0.1	-2.60961	-3.32194	Not Detected	Not Detected	CGAGAGTTGCGTCTG	MIMAT0029892					0
mmu-miR-21a-3p	388.222	8.60074	388.222	up	20.7584	0.1	5.2788	-3.32194	Detected	Not Detected	GACAGCCCATCGACT	MIMAT0004628	chr11	86397645	86397631	+	0
mmu-miR-21a-5p	21.8083	4.4468	21.8083	up	51684.5	6934.26	16.3446	11.8978	Detected	Detected	TCAACATCAGTCTGATAAGC	MIMAT0000530	chr11	86397607	86397588	+	0
mmu-miR-21b	1.63844	0.712327	1.63844	up	0.1	0.1	-2.60961	-3.32194	Not Detected	Not Detected	GGAAATATCAGTCTGATAAAC	MIMAT0025121					0
mmu-miR-21c	1.63844	0.712327	1.63844	up	0.1	0.1	-2.60961	-3.32194	Not Detected	Not Detected	TTGTACCAGTCTGATAAGC	MIMAT0025148					0
mmu-miR-22-3p	2.00711	1.00512	2.00711	up	1015.99	1528.63	10.8038	9.79867	Detected	Detected	ACAGTTCTTCAACTGGCAG	MIMAT0000531	chr11	75277278	75277295	-	0
mmu-miR-22-5p	-1.74952	-0.806963	1.74952	down	3.50675	25.0414	2.94949	3.75646	Detected	Detected	TAAAGCTTGCCACTGAAGA	MIMAT0004629	chr11	75277240	75277257	-	0
mmu-miR-221-3p	15.8936	3.99037	15.8936	up	501.115	99.3867	9.68105	5.69068	Detected	Detected	GAAACCCAGCAGACAATGTA	MIMAT0000669	chrX	18723501	18723483	+	0
mmu-miR-221-5p	1.63844	0.712327	1.63844	up	0.1	0.1	-2.60961	-3.32194	Not Detected	Not Detected	ACAGAAATCTACATTGTATGC	MIMAT0017060	chrX	18723464	18723445	+	0
mmu-miR-222-3p	31.4607	4.97548	31.4607	up	134.413	17.6689	7.99692	3.02144	Detected	Detected	ACCCAGTAGCCAGA	MIMAT0000670	chrX	18724087	18724075	+	0
mmu-miR-222-5p	72.6508	6.18291	72.6508	up	3.19306	0.1	2.86097	-3.32194	Detected	Not Detected	AGGATCTACACTGGCTAC	MIMAT0017061	chrX	18724050	18724034	+	0
mmu-miR-223-3p	-1.57887	-0.658895	1.57887	down	32.0165	183.703	5.94161	6.6005	Detected	Detected	TGGGGTATTTGACAAACTGAC	MIMAT0000665	chrX	93438225	93438244	-	0
mmu-miR-223-5p	1.63844	0.712327	1.63844	up	0.1	0.1	-2.60961	-3.32194	Not Detected	Not Detected	CAACTCAGCTTGTCAAA	MIMAT0017056	chrX	93438188	93438203	-	0
mmu-miR-224-3p	1.63844	0.712327	1.63844	up	0.1	0.1	-2.60961	-3.32194	Not Detected	Not Detected	TGTAGTCACTAGGGCAC	MIMAT0017062	chrX	69506445	69506430	+	0
mmu-miR-224-5p	2.04318	1.03082	2.04318	up	17.8902	29.8856	5.07952	4.0487	Detected	Detected	AACGGAACCACTAGTGACTTA	MIMAT0000671	chrX	69506397	69506378	+	0
mmu-miR-23a-3p	3.35351	1.74567	3.35351	up	4333.37	5112.39	13.2014	11.4558	Detected	Detected	GGAAATCCCTGGCAATGT	MIMAT0000532	chr8	86732466	86732482	-	0
mmu-miR-23a-5p	-1.14668	-0.197461	1.14668	down	29.6377	122.608	5.80845	6.00591	Detected	Detected	AAATCCCATCCCCAG	MIMAT0017019	chr8	86732434	86732447	-	0
mmu-miR-23b-3p	-1.04905	-0.0690899	1.04905	down	374.044	1105.69	9.28038	9.34947	Detected	Detected	GGTAATCCCTGGCAATG	MIMAT0000125	chr13	63401842	63401857	-	0
mmu-miR-23b-5p	1.63844	0.712327	1.63844	up	0.1	0.1	-2.60961	-3.32194	Not Detected	Not Detected	AAATCAGCATGCCAGG	MIMAT0016980	chr13	63401806	63401820	-	0
mmu-miR-24-1-5p	-6.69704	-2.74352	6.69704	down	0.1	12.0399	-2.60961	0.133912	Not Detected	Detected	ACTGATATCAGCTCAGTAGGC	MIMAT0000218	chr13	63402524	63402543	-	0
mmu-miR-24-2-5p	1.52278	0.606708	1.52278	up	12.9649	28.4492	4.57722	3.97051	Detected	Detected	ACTGTTTCAGCTCAGTA	MIMAT0005440	chr8	86732744	86732759	-	0
mmu-miR-24-3p	4.53301	2.18047	4.53301	up	4582.38	3808.93	13.2639	11.0834	Detected	Detected	CTGTTCCTGCTGAACTGA	MIMAT0000219	chr8	86732778	86732795	-	0
mmu-miR-25-3p	-1.80344	-0.85075	1.80344	down	1673.97	10574.9	11.5852	12.4359	Detected	Detected	TCAGACCGAGACAAGTGC	MIMAT0000652	chr5	138606621	138606605	+	0
mmu-miR-25-5p	1.63844	0.712327	1.63844	up	0.1	0.1	-2.60961	-3.32194	Not Detected	Not Detected	GCAATTGCCCAAGTC	MIMAT0017049	chr5	138606583	138606570	+	0
mmu-miR-26a-1-3p	1.63844	0.712327	1.63844	up	0.1	0.1	-2.60961	-3.32194	Not Detected	Not Detected	CGTGCAAGTAACCAAG	MIMAT0017020	chr9	118940975	118940989	-	0
mmu-miR-26a-2-3p	1.63844	0.712327	1.63844	up	0.1	0.1	-2.60961	-3.32194	Not Detected	Not Detected	GAAACAAGTAATCAAGAACA	MIMAT0017058	chr10	126432640	126432658	-	0
mmu-miR-26a-5p	-1.77094	-0.824511	1.77094	down	619.514	3153.23	9.99298	10.8175	Detected	Detected	AGCCTATCCTGGATTA	MIMAT0000533	chr9	118940935	118940950	-	0
mmu-miR-26b-3p	1.63844	0.712327	1.63844	up	0.1	0.1	-2.60961	-3.32194	Not Detected	Not Detected	GAGCCAAGTAATGGAGAACA	MIMAT0004630	chr1	74440937	74440955	-	0
mmu-miR-26b-5p	-2.36289	-1.24055	2.36289	down	214.137	1552.53	8.58173	9.82228	Detected	Detected	ACCTATCCTGAATTACTTGA	MIMAT0000534	chr1	74440900	74440918	-	0
mmu-miR-27a-3p	2.01256	1.00903	2.01256	up	2570.64	4322.8	12.1967	11.1877	Detected	Detected	GCGGAACTTAGCCACTG	MIMAT0000537	chr8	86732631	86732646	-	0
mmu-miR-27a-5p	1.63844	0.712327	1.63844	up	0.1	0.1	-2.60961	-3.32194	Not Detected	Not Detected	TGCTCACAAGCAGCTA	MIMAT0004633	chr8	86732591	86732605	-	0
mmu-miR-27b-3p	-1.47866	-0.564289	1.47866	down	209.463	944.225	8.55668	9.12097	Detected	Detected	GCAGAACTTAGCCACTG	MIMAT0000126	chr13	63402073	63402088	-	0
mmu-miR-27b-5p	1.63844	0.712327	1.63844	up	0.1	0.1	-2.60961	-3.32194	Not Detected	Not Detected	GTTCACCAATCAGCTAA	MIMAT0004522	chr13	63402032	63402047	-	0
mmu-miR-2861	1.64172	0.715212	1.64172	up	1397.47	2458.39	11.2636	10.5484	Detected	Detected	CCGCCCGCCG	MIMAT0013803					0
mmu-miR-28a-3p	130.123	7.02373	130.123	up	52.5535	5.74972	6.62451	-0.399218	Detected	Detected	TCCAGCAGCTCACA	MIMAT0004661	chr16	24828002	24828015	-	0
mmu-miR-28a-5p	1.92588	0.945517	1.92588	up	170.74	281.274	8.23635	7.29083	Detected	Detected	CTCAATAGACTGTGAGCTCC	MIMAT0000653	chr16	24827956	24827975	-	0
mmu-miR-28b	1.63844	0.712327	1.63844	up	0.1	0.1	-2.60961	-3.32194	Not Detected	Not Detected	CTAAATAGATTGTGAGCTCC	MIMAT0019354					0
mmu-miR-28c	2.10504	1.07385	2.10504	up	18.8278	30.4302	5.15557	4.08172	Detected	Detected	TCAATAGACTGTGAGCTC	MIMAT0019339					0
mmu-miR-290a-3p	-3.52137	-1.81613	3.52137	down	11.7648	143.808	4.41172	6.22785	Detected	Detected	GGGCTTAAAACTAGGCGGC	MIMAT0004572	chr7	3218680	3218697	-	0
mmu-miR-290a-5p	-11.4458	-3.51675	11.4458	down	88.4516	3208.52	7.33058	10.8473	Detected	Detected	AAAGTGCCCCCATAG	MIMAT0000366	chr7	3218647	3218660	-	0
mmu-miR-290b-3p	1.36976	0.453924	1.36976	up	29.9735	78.8451	5.82739	5.37346	Detected	Detected	TACTCAAACTATGGGGGC	MIMAT0029901					0
mmu-miR-290b-5p	50882.5	15.6349	50882.5	up	2760.12	0.1	12.3129	-3.32194	Detected	Not Detected	AAAGTGCCGCCTAGT	MIMAT0029900					0
mmu-miR-291a-3p	-182.342	-7.5105	182.342	down	87.5076	65544.2	7.3031	14.8136	Detected	Detected	GCACACAAAGTGGAAGCACT	MIMAT0000368					0
mmu-miR-291a-5p	-265.179	-8.05082	265.179	down	1.78848	2197.67	2.38142	10.4322	Detected	Detected	AGAGAGGGCCTCCAC	MIMAT0000367					0
mmu-miR-291b-3p	-6.27222	-2.64898	6.27222	down	0.1	10.5609	-2.60961	0.0393636	Not Detected	Detected	ACAAACAAAATGGATGCACTTT	MIMAT0003190					0
mmu-miR-291b-5p	1.27011	0.344955	1.27011	up	13.6937	35.946	4.65153	4.30658	Detected	Detected	GGAGAGGGCCTCC	MIMAT0003189					0
mmu-miR-292a-3p	-272.149	-8.08825	272.149	down	180.053	135570	8.32797	16.4162	Detected	Detected	ACACTCAAAACCTGGCGGC	MIMAT0000370	chr7	3219244	3219261	-	0
mmu-miR-292a-5p	-10.3284	-3.36854	10.3284	down	36.4849	1234.19	6.14818	9.51672	Detected	Detected	CAAAAGAGCCCCCAG	MIMAT0000369	chr7	3219208	3219221	-	0
mmu-miR-292b-3p	1.34232	0.424727	1.34232	up	30.0118	82.0966	5.83784	5.41312	Detected	Detected	ATACTCAAACTGGGGGC	MIMAT0029865					0
mmu-miR-292b-5p	1787.31	10.8036	1787.31	up	99.0517	0.1	7.48163	-3.32194	Detected	Not Detected	AAAAGTGCCGCCAGG	MIMAT0029864					0
mmu-miR-293-3p	-220.614	-7.78538	220.614	down	209.526	133993	8.55924	16.3446	Detected	Detected	ACACTACAAACTCTGCGGC	MIMAT0000371	chr7	3220395	3220412	-	0
mmu-miR-293-5p	-505.292	-8.98097	505.292	down	0.1	159.754	-2.60961	6.37136	Not Detected	Detected	CAAAATGTCACACAGTTTGAGT	MIMAT0004573	chr7	3220358	3220378	-	0
mmu-miR-294-3p	-237.384	-7.89108	237.384	down	82.381	73780.3	7.24296	15.134	Detected	Detected	ACACACAAAAGGGAAGCACTT	MIMAT0000372	chr7	3220694	3220713	-	0
mmu-miR-294-5p	-2480.41	-11.2764	2480.41	down	0.1	731.896	-2.60961	8.66675	Not Detected	Detected	AGATAGGGCCTCCAT	MIMAT0004574	chr7	3220664	3220677	-	0
mmu-miR-295-3p	-203.204	-7.66678	203.204	down	85.8951	73449.5	7.27899	14.9458	Detected	Detected	AGACTCAAAAGTAGTAGCACTT	MIMAT0000373	chr7	3220818	3220838	-	0
mmu-miR-295-5p	-6.38475	-2.67463	6.38475	down	30.3887	662.375	5.85848	8.53311	Detected	Detected	GAAGTGTGCCCCAC	MIMAT0004575	chr7	3220789	3220801	-	0
mmu-miR-296-3p	-5.82931	-2.54332	5.82931	down	0.1	9.12201	-2.60961	-0.0662881	Not Detected	Detected	GGAGAGCCTCCAC	MIMAT0004576					0
mmu-miR-296-5p	2.00307	1.00221	2.00307	up	221.613	376.605	8.65189	7.64968	Detected	Detected	ACAGGATTGAGGGGGGGC	MIMAT0000374					0
mmu-miR-297a-3p	-358.966	-8.48771	358.966	down	0.1	111.577	-2.60961	5.87809	Not Detected	Detected	TATGGGTATGTGTGTATGT	MIMAT0004864	chr2	10430695	10430713	-	0
mmu-miR-297b-5p	-114.529	-6.83958	114.529	down	0.1	33.4655	-2.60961	4.22996	Not Detected	Detected	ACATGTTCATGCACACATA	MIMAT0003480					0
mmu-miR-297c-5p	-2984.65	-11.5433	2984.65	down	0.1	864.872	-2.60961	8.93374	Not Detected	Detected	ACATGTACATGCACACATACA	MIMAT0004865	chr2	10430655	10430674	-	0
mmu-miR-298-3p	1.63844	0.712327	1.63844	up	0.1	0.1	-2.60961	-3.32194	Not Detected	Not Detected	GCTGAGAGAAGGCTAG	MIMAT0017007	chr2	174093076	174093062	+	0
mmu-miR-298-5p	1.7888	0.838995	1.7888	up	19.6236	37.9106	5.20124	4.36225	Detected	Detected	GGGAAGAACAGCCCTC	MIMAT0000376	chr2	174093037	174093023	+	0
mmu-miR-299a-3p	-2.61785	-1.38838	2.61785	down	0.1	1.8397	-2.60961	-1.22123	Not Detected	Detected	AAGCGGTTTACCGTCCC	MIMAT0004577	chr12	110948891	110948907	-	0
mmu-miR-299b-3p	-86.7584	-6.43893	86.7584	down	0.1	26.0908	-2.60961	3.82932	Not Detected	Detected	GGTTTACCGTCCCAC	MIMAT0022837					0
mmu-miR-299b-5p	1.63844	0.712327	1.63844	up	0.1	0.1	-2.60961	-3.32194	Not Detected	Not Detected	ATGTATGTGGGACGGTAAAC	MIMAT0022836	chr12	110948856	110948875	-	0
mmu-miR-29a-3p	3.30434	1.72436	3.30434	up	2832.33	2754.83	12.3822	10.6579	Detected	Detected	TAACCGATTTCAGATGGTGC	MIMAT0000535	chr6	31012734	31012716	+	0
mmu-miR-29a-5p	46.2071	5.53004	46.2071	up	1.44043	0.1	2.2081	-3.32194	Detected	Not Detected	CTGAACACCAAAAGAAATCAGT	MIMAT0004631	chr6	31012696	31012676	+	0
mmu-miR-29b-1-5p	11.6964	3.54799	11.6964	up	5.95242	9.51174	3.51188	-0.0361094	Detected	Detected	TAAACCACCATATGAAACCAGC	MIMAT0004523	chr6	31013049	31013028	+	0
mmu-miR-29b-2-5p	1.63844	0.712327	1.63844	up	0.1	0.1	-2.60961	-3.32194	Not Detected	Not Detected	AATCTAAGCCACCATGTG	MIMAT0017063	chr1	196863252	196863268	-	0
mmu-miR-29b-3p	2.11721	1.08216	2.11721	up	794.112	1031.3	10.3485	9.26638	Detected	Detected	AACACTGATTTCAAATGGTGC	MIMAT0000127	chr1	196863287	196863307	-	0
mmu-miR-29c-3p	-4.73133	-2.24225	4.73133	down	246.188	3727.67	8.80161	11.0439	Detected	Detected	TAACCGATTTCAAATGGTGCTA	MIMAT0000536	chr1	196863795	196863815	-	0
mmu-miR-29c-5p	-7.78643	-2.96096	7.78643	down	3.75306	121.675	3.0288	5.98976	Detected	Detected	GAACACCAGGAGAAATCGGTC	MIMAT0004632	chr1	196863758	196863777	-	0
mmu-miR-300-3p	1.02612	0.0372026	1.02612	up	4.87323	19.8955	3.3118	3.2746	Detected	Detected	GAAGAGAGCTTGCCCTTG	MIMAT0000378	chr12	110962578	110962594	-	0
mmu-miR-300-5p	8.37258	3.06567	8.37258	up	4.90242	14.5383	3.3356	0.269929	Detected	Detected	ACAAAGGATAACCTCTCTTCAA	MIMAT0004578	chr12	110962529	110962549	-	0
mmu-miR-301a-3p	-2.4118	-1.27011	2.4118	down	557.601	4074.82	9.87047	11.1406	Detected	Detected	GCTTTGACAATACTATTGCAC	MIMAT0000379	chr11	86926559	86926578	-	0
mmu-miR-301a-5p	1.63844	0.712327	1.63844	up	0.1	0.1	-2.60961	-3.32194	Not Detected	Not Detected	AGTAGTGCAATAAAGTCAGA	MIMAT0017008	chr11	86926522	86926540	-	0
mmu-miR-301b-3p	-4.67821	-2.22596	4.67821	down	46.443	762.519	6.47834	8.70429	Detected	Detected	GCTTTGACAATACCATTGCA	MIMAT0004186	chr16	17124569	17124551	+	0
mmu-miR-301b-5p	1.63844	0.712327	1.63844	up	0.1	0.1	-2.60961	-3.32194	Not Detected	Not Detected	AGTAGTGCAACCTAGTCA	MIMAT0017232	chr16	17124533	17124517	+	0
mmu-miR-302a-3p	-1449.86	-10.5017	1449.86	down	0.1	462.975	-2.60961	7.89209	Not Detected	Detected	TCACCAAAACATGGAAGCAC	MIMAT0000380	chr3	127248461	127248479	-	0
mmu-miR-302a-5p	-4.72784	-2.24118	4.72784	down	0.1	6.00043	-2.60961	-0.368431	Not Detected	Detected	GCAAGTACAACCACGTTT	MIMAT0004579	chr3	127248424	127248440	-	0
mmu-miR-302b-3p	-373.25	-8.544	373.25	down	0.1	117.012	-2.60961	5.93438	Not Detected	Detected	CTACTAAAACATGGAAGCACT	MIMAT0003374	chr3	127248196	127248215	-	0
mmu-miR-302b-5p	1.63844	0.712327	1.63844	up	0.1	0.1	-2.60961	-3.32194	Not Detected	Not Detected	AGAAAGCATTCCCATGTTA	MIMAT0003373	chr3	127248161	127248178	-	0
mmu-miR-302c-3p	-547.294	-9.09617	547.294	down	0.1	172.833	-2.60961	6.48656	Not Detected	Detected	CCACTGAAACATGGAAGCAC	MIMAT0003376	chr3	127248327	127248345	-	0
mmu-miR-302c-5p	1.63844	0.712327	1.63844	up	0.1	0.1	-2.60961	-3.32194	Not Detected	Not Detected	GCAGGTAACCCCAT	MIMAT0003375	chr3	127248295	127248307	-	0
mmu-miR-302d-3p	-333.824	-8.38294	333.824	down	0.1	103.222	-2.60961	5.77333	Not Detected	Detected	ACACTCAAACATGGAAGCA	MIMAT0003377	chr3	127248588	127248605	-	0
mmu-miR-302d-5p	-3.41005	-1.76979	3.41005	down	0.1	3.1216	-2.60961	-0.839821	Not Detected	Detected	AGCAAGTGCCTCCATG	MIMAT0017225	chr3	127248555	127248569	-	0
mmu-miR-3057-3p	1.63844	0.712327	1.63844	up	0.1	0.1	-2.60961	-3.32194	Not Detected	Not Detected	GCTATGAGCTGGGCC	MIMAT0014823					0
mmu-miR-3057-5p	2.8079	1.48949	2.8079	up	73.1153	91.9759	7.06343	5.57394	Detected	Detected	ATCCCGCAGAATCTCA	MIMAT0014822					0
mmu-miR-3058-3p	-1.04395	-0.062048	1.04395	down	14.0074	50.3485	4.69786	4.75991	Detected	Detected	GGCACCCACGGC	MIMAT0014814	chr10	95021942	95021932	+	0
mmu-miR-3058-5p	-1.36566	-0.4496	1.36566	down	15.9655	75.789	4.88416	5.33376	Detected	Detected	TCTTCCAGGTAAGCCG	MIMAT0014813	chr10	95021900	95021886	+	0
mmu-miR-3059-3p	5.38574	2.42914	5.38574	up	234.458	156.78	8.75218	6.32304	Detected	Detected	CCAACCTTCTCTTCCC	MIMAT0014812	chr10	101235381	101235395	-	0
mmu-miR-3059-5p	-3.55737	-1.83081	3.55737	down	0.1	3.39716	-2.60961	-0.778799	Not Detected	Detected	ACCCTATGGGGCAGA	MIMAT0014811	chr10	101235346	101235359	-	0
mmu-miR-3060-3p	-66.8967	-6.06386	66.8967	down	0.1	21.4421	-2.60961	3.45425	Not Detected	Detected	TGGGAGTGCTTCTGTG	MIMAT0014827	chr11	4039423	4039437	-	0
mmu-miR-3060-5p	1.63844	0.712327	1.63844	up	0.1	0.1	-2.60961	-3.32194	Not Detected	Not Detected	CAGAAGCACGAAGCA	MIMAT0014826	chr11	4039386	4039399	-	0
mmu-miR-3061-3p	227.459	7.82946	227.459	up	12.442	0.1	4.50752	-3.32194	Detected	Not Detected	GGCAGTGGACTATCAA	MIMAT0014829					0
mmu-miR-3061-5p	-6.8568	-2.77753	6.8568	down	0.1	12.6212	-2.60961	0.167922	Not Detected	Detected	GGCTACCTTTCACGG	MIMAT0014828					0
mmu-miR-3062-3p	1.63844	0.712327	1.63844	up	0.1	0.1	-2.60961	-3.32194	Not Detected	Not Detected	AGGAGAAAGTGTGTCCC	MIMAT0014831	chr11	68804157	68804142	+	0
mmu-miR-3062-5p	1.63844	0.712327	1.63844	up	0.1	0.1	-2.60961	-3.32194	Not Detected	Not Detected	TCACGGTAACACTACATT	MIMAT0014830	chr11	68804116	68804100	+	0
mmu-miR-3063-3p	1.63844	0.712327	1.63844	up	0.1	0.1	-2.60961	-3.32194	Not Detected	Not Detected	GGCGAGAGATCAGGA	MIMAT0014833	chr11	95824685	95824672	+	0
mmu-miR-3063-5p	1.63844	0.712327	1.63844	up	0.1	0.1	-2.60961	-3.32194	Not Detected	Not Detected	AGTGTGCAAACCTGATC	MIMAT0014832	chr11	95824642	95824627	+	0
mmu-miR-3064-3p	1.63844	0.712327	1.63844	up	0.1	0.1	-2.60961	-3.32194	Not Detected	Not Detected	TGTAAGGTGTTGCAGTG	MIMAT0014835					0
mmu-miR-3064-5p	1.63844	0.712327	1.63844	up	0.1	0.1	-2.60961	-3.32194	Not Detected	Not Detected	TTTGCACACCACAACA	MIMAT0014834					0
mmu-miR-3065-3p	3.01391	1.59164	3.01391	up	21.8068	25.6834	5.39075	3.79911	Detected	Detected	CCCCAACAATATCCTGG	MIMAT0014837	chr11	119876140	119876155	-	0
mmu-miR-3065-5p	1.63844	0.712327	1.63844	up	0.1	0.1	-2.60961	-3.32194	Not Detected	Not Detected	CCAGCATCAGTGATTTT	MIMAT0014836	chr11	119876100	119876115	-	0
mmu-miR-3066-3p	-3.76243	-1.91166	3.76243	down	0.1	3.80009	-2.60961	-0.697947	Not Detected	Detected	GCAGGTTGCGGTC	MIMAT0014839	chr12	17362257	17362268	-	0
mmu-miR-3066-5p	-3.82789	-1.93655	3.82789	down	0.1	3.93348	-2.60961	-0.673061	Not Detected	Detected	CTACTTAATCTACAGCAACC	MIMAT0014838	chr12	17362213	17362231	-	0
mmu-miR-3067-3p	3.37656	1.75555	3.37656	up	164.321	167.045	8.18179	6.42624	Detected	Detected	CCTCTCCCAGGGC	MIMAT0014841	chr12	82267199	82267210	-	0
mmu-miR-3067-5p	-3.46895	-1.7945	3.46895	down	0.1	3.23037	-2.60961	-0.815114	Not Detected	Detected	ACACCACAGCGGGC	MIMAT0014840	chr12	82267162	82267174	-	0
mmu-miR-3068-3p	-121.471	-6.92447	121.471	down	0.1	36.1315	-2.60961	4.31486	Not Detected	Detected	TGTTGGAGTACTGCAATT	MIMAT0014843	chr12	88778701	88778685	+	0
mmu-miR-3068-5p	1.63844	0.712327	1.63844	up	0.1	0.1	-2.60961	-3.32194	Not Detected	Not Detected	GGTTAGAACTTGCATGAA	MIMAT0014842	chr12	88778662	88778646	+	0
mmu-miR-3069-3p	-332.663	-8.37792	332.663	down	0.1	102.962	-2.60961	5.76831	Not Detected	Detected	TGTGGCAGTACTTAGTGT	MIMAT0014845					0
mmu-miR-3069-5p	1.63844	0.712327	1.63844	up	0.1	0.1	-2.60961	-3.32194	Not Detected	Not Detected	GCTAAACAATATCTTGACTG	MIMAT0014844					0
mmu-miR-3070-2-3p	-1.02161	-0.030838	1.02161	down	20.261	72.5273	5.24429	5.27513	Detected	Detected	TCTACCCCTGACCATAG	MIMAT0014849	chr12	109588654	109588669	-	0
mmu-miR-3070-3p	-1.11989	-0.163363	1.11989	down	12.5391	47.6762	4.5213	4.68467	Detected	Detected	TCTACCCCTGACGGT	MIMAT0014847	chr12	110826216	110826230	-	0
mmu-miR-3070-5p	-3.71476	-1.89327	3.71476	down	0.1	3.7044	-2.60961	-0.716344	Not Detected	Detected	TCCCAGGTTCAAGGT	MIMAT0014846	chr12	110826177	110826191	-	0
mmu-miR-3071-3p	-3.44822	-1.78585	3.44822	down	0.1	3.19189	-2.60961	-0.823759	Not Detected	Detected	GGACTCCATTTGTTTTGA	MIMAT0014851	chr12	110833596	110833580	+	0
mmu-miR-3071-5p	1.63844	0.712327	1.63844	up	0.1	0.1	-2.60961	-3.32194	Not Detected	Not Detected	TCCATCATCGTCTCAAAT	MIMAT0014850	chr12	110833562	110833546	+	0
mmu-miR-3072-3p	-3.53821	-1.82302	3.53821	down	0.1	3.36066	-2.60961	-0.786592	Not Detected	Detected	AGAAGGCTTCCTGGAG	MIMAT0014853	chr12	110986145	110986159	-	0
mmu-miR-3072-5p	2.51971	1.33326	2.51971	up	527.958	654.944	9.82745	8.49419	Detected	Detected	CCTGCCCTCCCTC	MIMAT0014852	chr12	110986113	110986124	-	0
mmu-miR-3073a-3p	1.63844	0.712327	1.63844	up	0.1	0.1	-2.60961	-3.32194	Not Detected	Not Detected	CTATGGTCACAGTGGA	MIMAT0014855	chr12	113347508	113347522	-	0
mmu-miR-3073a-5p	1.63844	0.712327	1.63844	up	0.1	0.1	-2.60961	-3.32194	Not Detected	Not Detected	GGCTGGCGCCAA	MIMAT0014854	chr12	113347474	113347484	-	0
mmu-miR-3073b-3p	1.63844	0.712327	1.63844	up	0.1	0.1	-2.60961	-3.32194	Not Detected	Not Detected	CAGTGGTCACAGTTGG	MIMAT0022376					0
mmu-miR-3073b-5p	1.63844	0.712327	1.63844	up	0.1	0.1	-2.60961	-3.32194	Not Detected	Not Detected	GGTTGATGTCCACTGT	MIMAT0022375					0
mmu-miR-3074-1-3p	1.63844	0.712327	1.63844	up	0.1	0.1	-2.60961	-3.32194	Not Detected	Not Detected	CGGTGCCTACTGAGC	MIMAT0014857					0
mmu-miR-3074-2-3p	21.2364	4.40847	21.2364	up	7.00918	3.70075	3.69141	-0.717055	Detected	Detected	GTGCCTACTGAGCTGA	MIMAT0014946					0
mmu-miR-3074-5p	1.63844	0.712327	1.63844	up	0.1	0.1	-2.60961	-3.32194	Not Detected	Not Detected	ACTGGCTCAGTTCAGC	MIMAT0014856					0
mmu-miR-3075-3p	1.63844	0.712327	1.63844	up	0.1	0.1	-2.60961	-3.32194	Not Detected	Not Detected	ACACCTAGGAAGGCC	MIMAT0014859	chr14	26353984	26353997	-	0
mmu-miR-3075-5p	-1.36625	-0.450221	1.36625	down	18.1479	90.6557	5.09621	5.54643	Detected	Detected	GTCCTTGGCTGCTC	MIMAT0014858	chr14	26353945	26353957	-	0
mmu-miR-3076-3p	1.63844	0.712327	1.63844	up	0.1	0.1	-2.60961	-3.32194	Not Detected	Not Detected	CTGCAAGGGAAGACC	MIMAT0014861					0
mmu-miR-3076-5p	1.86531	0.899413	1.86531	up	7.94294	17.1111	3.85767	2.95825	Detected	Detected	GGCTGGCACTGAGC	MIMAT0014860					0
mmu-miR-3077-3p	1.63844	0.712327	1.63844	up	0.1	0.1	-2.60961	-3.32194	Not Detected	Not Detected	CTGCGGAGAAGCAG	MIMAT0014863	chr14	58417312	58417324	-	0
mmu-miR-3077-5p	1.60128	0.679222	1.60128	up	109.3	244.588	7.71184	7.03261	Detected	Detected	GGCCTGCCCGC	MIMAT0014862	chr14	58417276	58417285	-	0
mmu-miR-3078-3p	50.8094	5.66702	50.8094	up	25.4044	9.25083	5.61085	-0.0561726	Detected	Detected	CCTAAAGACTACCCCAG	MIMAT0014865	chr14	65210080	65210095	-	0
mmu-miR-3078-5p	-6.22463	-2.63799	6.22463	down	0.1	10.4012	-2.60961	0.0283771	Not Detected	Detected	AGGTAGCTGCAGTCTAG	MIMAT0014864	chr14	65210044	65210059	-	0
mmu-miR-3079-3p	1.63844	0.712327	1.63844	up	0.1	0.1	-2.60961	-3.32194	Not Detected	Not Detected	GACTTTCATCTGATGAGC	MIMAT0014867					0
mmu-miR-3079-5p	1.63844	0.712327	1.63844	up	0.1	0.1	-2.60961	-3.32194	Not Detected	Not Detected	CCAGCTTAGCTCATCA	MIMAT0014866					0
mmu-miR-3080-3p	1.63844	0.712327	1.63844	up	0.1	0.1	-2.60961	-3.32194	Not Detected	Not Detected	TGTCAAGCGCTTTGC	MIMAT0014869					0
mmu-miR-3080-5p	1.63844	0.712327	1.63844	up	0.1	0.1	-2.60961	-3.32194	Not Detected	Not Detected	ATCCAAGAACAGGCGC	MIMAT0014868					0
mmu-miR-3081-3p	1.63844	0.712327	1.63844	up	0.1	0.1	-2.60961	-3.32194	Not Detected	Not Detected	CCAGCTCAGAGATCG	MIMAT0014871	chr16	44558230	44558217	+	0
mmu-miR-3081-5p	-2.90669	-1.53938	2.90669	down	91.5794	855.387	7.37157	8.91095	Detected	Detected	GCTCACCGCTCCA	MIMAT0014870	chr16	44558196	44558185	+	0
mmu-miR-3082-3p	1.63844	0.712327	1.63844	up	0.1	0.1	-2.60961	-3.32194	Not Detected	Not Detected	CTGCAGAGTTGAGTGC	MIMAT0014873					0
mmu-miR-3082-5p	-1.14036	-0.189484	1.14036	down	18.6881	75.4184	5.13947	5.32896	Detected	Detected	ACACAGACACACACAC	MIMAT0014872					0
mmu-miR-3083-3p	1.63844	0.712327	1.63844	up	0.1	0.1	-2.60961	-3.32194	Not Detected	Not Detected	TAAAGGCTGGGAATGTTT	MIMAT0014875	chr17	27085062	27085046	+	0
mmu-miR-3083-5p	1.63844	0.712327	1.63844	up	0.1	0.1	-2.60961	-3.32194	Not Detected	Not Detected	ATCTCTGAAATATTCCCAGC	MIMAT0014874	chr17	27085027	27085009	+	0
mmu-miR-3084-3p	-3.62777	-1.85908	3.62777	down	0.1	3.53294	-2.60961	-0.750529	Not Detected	Detected	GTCTGAAGGAGACTGG	MIMAT0014877	chr19	25016788	25016773	+	0
mmu-miR-3084-5p	-88.714	-6.47109	88.714	down	0.1	26.543	-2.60961	3.86148	Not Detected	Detected	ACTCTGCTAATTAACCTTCA	MIMAT0014876	chr19	25016752	25016733	+	0
mmu-miR-3085-3p	1.55886	0.640492	1.55886	up	28.853	65.9931	5.76831	5.12781	Detected	Detected	GAGGGGGCCATAGC	MIMAT0014879					0
mmu-miR-3085-5p	2.7959	1.48331	2.7959	up	34.8788	44.576	6.08517	4.60186	Detected	Detected	ACTCTTGGCCCTCGG	MIMAT0014878					0
mmu-miR-3086-3p	1.63844	0.712327	1.63844	up	0.1	0.1	-2.60961	-3.32194	Not Detected	Not Detected	CTTAGACTGTAGGCTCA	MIMAT0014881					0
mmu-miR-3086-5p	1.63844	0.712327	1.63844	up	0.1	0.1	-2.60961	-3.32194	Not Detected	Not Detected	TCCAATGGGCCTACAA	MIMAT0014880					0
mmu-miR-3087-3p	1.63844	0.712327	1.63844	up	0.1	0.1	-2.60961	-3.32194	Not Detected	Not Detected	TGAGGACATGACAGTGA	MIMAT0014896	chr2	25298338	25298353	-	0
mmu-miR-3087-5p	-5.22264	-2.38478	5.22264	down	0.1	7.32214	-2.60961	-0.224831	Not Detected	Detected	CTCAACTCTTGCCCTG	MIMAT0014895	chr2	25298306	25298320	-	0
mmu-miR-3088-3p	1.63844	0.712327	1.63844	up	0.1	0.1	-2.60961	-3.32194	Not Detected	Not Detected	ACACCTTTGCAGCTGC	MIMAT0014898	chr2	28588849	28588863	-	0
mmu-miR-3088-5p	1.63844	0.712327	1.63844	up	0.1	0.1	-2.60961	-3.32194	Not Detected	Not Detected	AGCTCATGAACAACTGC	MIMAT0014897	chr2	28588812	28588827	-	0
mmu-miR-3089-3p	1.63844	0.712327	1.63844	up	0.1	0.1	-2.60961	-3.32194	Not Detected	Not Detected	ACAGCTCAGGATCAGC	MIMAT0014900					0
mmu-miR-3089-5p	1.63844	0.712327	1.63844	up	0.1	0.1	-2.60961	-3.32194	Not Detected	Not Detected	AGACACGCTGTCCC	MIMAT0014899					0
mmu-miR-3090-3p	1.63844	0.712327	1.63844	up	0.1	0.1	-2.60961	-3.32194	Not Detected	Not Detected	TGAGTCAGGGTGTCAC	MIMAT0014902	chr2	133390503	133390517	-	0
mmu-miR-3090-5p	1.15387	0.206476	1.15387	up	11.4326	32.9666	4.38782	4.18135	Detected	Detected	GATCTCAGGCCCCA	MIMAT0014901	chr2	133390466	133390478	-	0
mmu-miR-3091-3p	1.63844	0.712327	1.63844	up	0.1	0.1	-2.60961	-3.32194	Not Detected	Not Detected	GTCTTGAGACTGGTCA	MIMAT0014904					0
mmu-miR-3091-5p	2.25069	1.17037	2.25069	up	17.7812	26.9942	5.06145	3.89109	Detected	Detected	GCGGGCCCAACC	MIMAT0014903					0
mmu-miR-3092-3p	2.09548	1.06728	2.09548	up	17.2721	28.3249	5.02448	3.9572	Detected	Detected	GGAGGGGAAACAGC	MIMAT0014906	chr3	27483902	27483890	+	0
mmu-miR-3092-5p	1.63844	0.712327	1.63844	up	0.1	0.1	-2.60961	-3.32194	Not Detected	Not Detected	TGGGAGAAAGGCATTTT	MIMAT0014905	chr3	27483859	27483844	+	0
mmu-miR-3093-3p	-1.19579	-0.257959	1.19579	down	26.5922	116.7	5.66898	5.92694	Detected	Detected	CCAACCTCCCACGG	MIMAT0014908					0
mmu-miR-3093-5p	89.9177	6.49053	89.9177	up	31.7176	4.57805	5.92694	-0.563597	Detected	Detected	AGTGTGAGCTCCGC	MIMAT0014907					0
mmu-miR-3094-3p	1.63844	0.712327	1.63844	up	0.1	0.1	-2.60961	-3.32194	Not Detected	Not Detected	CTTGAGGACACAATTTAAA	MIMAT0014910	chr4	40940774	40940791	-	0
mmu-miR-3094-5p	1.63844	0.712327	1.63844	up	0.1	0.1	-2.60961	-3.32194	Not Detected	Not Detected	GCTTTAAAAATGTCCCCA	MIMAT0014909	chr4	40940733	40940749	-	0
mmu-miR-3095-3p	9.87798	3.30422	9.87798	up	318.093	104.24	9.09599	5.79177	Detected	Detected	AAAAGCTCTCTCTCCAGT	MIMAT0014912					0
mmu-miR-3095-5p	1.63844	0.712327	1.63844	up	0.1	0.1	-2.60961	-3.32194	Not Detected	Not Detected	AGTGTCACAGATGAGAAA	MIMAT0014911					0
mmu-miR-3097-3p	1.63844	0.712327	1.63844	up	0.1	0.1	-2.60961	-3.32194	Not Detected	Not Detected	CTGACAGGTAGAAAGGT	MIMAT0014916					0
mmu-miR-3097-5p	1.63844	0.712327	1.63844	up	0.1	0.1	-2.60961	-3.32194	Not Detected	Not Detected	TGGACACACACTTCCC	MIMAT0014915					0
mmu-miR-3098-3p	1.63844	0.712327	1.63844	up	0.1	0.1	-2.60961	-3.32194	Not Detected	Not Detected	TCCTAAAGGCAGGCAG	MIMAT0014918					0
mmu-miR-3098-5p	-1.83329	-0.874435	1.83329	down	205.484	1157.69	8.52303	9.39747	Detected	Detected	GCTCCTACTCCTGCT	MIMAT0014917					0
mmu-miR-3099-3p	6.74688	2.75422	6.74688	up	245.889	128.948	8.79774	6.04352	Detected	Detected	TCCCCAACCTCTCTC	MIMAT0014816	chr7	6756357	6756370	-	0
mmu-miR-3099-5p	1.63844	0.712327	1.63844	up	0.1	0.1	-2.60961	-3.32194	Not Detected	Not Detected	CAAGGGCTGGAAGG	MIMAT0014815	chr7	6756319	6756331	-	0
mmu-miR-30a-3p	1.07398	0.102962	1.07398	up	78.5978	247.72	7.17634	7.07338	Detected	Detected	GCTGCAAACATCCGACT	MIMAT0000129	chr1	23279160	23279175	-	0
mmu-miR-30a-5p	-1.12396	-0.168593	1.12396	down	912.301	2844.67	10.5484	10.717	Detected	Detected	CTTCCAGTCGAGGATGT	MIMAT0000128	chr1	23279119	23279134	-	0
mmu-miR-30b-3p	-1.69448	-0.760839	1.69448	down	3.7588	25.4881	3.03232	3.79316	Detected	Detected	GACGTAAACATCCACATCCCA	MIMAT0004524	chr15	68169056	68169037	+	0
mmu-miR-30b-5p	-1.19818	-0.26084	1.19818	down	208.251	812.077	8.54637	8.80721	Detected	Detected	AGCTGAGTGTAGGATGT	MIMAT0000130	chr15	68169018	68169003	+	0
mmu-miR-30c-1-3p	-1.65441	-0.726315	1.65441	down	9.37084	51.6985	4.06755	4.79387	Detected	Detected	GGAGTAAACAACCCTCTCC	MIMAT0004616	chr4	120442215	120442198	+	0
mmu-miR-30c-2-3p	4.25627	2.08959	4.25627	up	87.1744	68.9736	7.29083	5.20124	Detected	Detected	AGAGTAAACAGCCTTCTCC	MIMAT0005438	chr1	23298597	23298614	-	0
mmu-miR-30c-5p	-3.06114	-1.61407	3.06114	down	326.48	2862.49	9.11629	10.7304	Detected	Detected	GCTGAGAGTGTAGGATGT	MIMAT0000514	chr1	23298558	23298575	-	0
mmu-miR-30d-3p	-2.41405	-1.27145	2.41405	down	0.1	1.5644	-2.60961	-1.33816	Not Detected	Detected	GCAGCAAACATCTGACTGA	MIMAT0017011	chr15	68172842	68172825	+	0
mmu-miR-30d-5p	2.79968	1.48526	2.79968	up	219.463	262.263	8.62923	7.14397	Detected	Detected	CTTCCAGTCGGGGA	MIMAT0000515	chr15	68172802	68172790	+	0
mmu-miR-30e-3p	-3.94984	-1.98179	3.94984	down	22.8099	312.054	5.44604	7.42783	Detected	Detected	GCTGTAAACATCCGACTG	MIMAT0000249	chr4	120445290	120445274	+	0
mmu-miR-30e-5p	-3.51594	-1.81391	3.51594	down	142.719	1571.41	8.05656	9.87047	Detected	Detected	CTTCCAGTCAAGGATGT	MIMAT0000248	chr4	120445248	120445233	+	0
mmu-miR-30f	1.63844	0.712327	1.63844	up	0.1	0.1	-2.60961	-3.32194	Not Detected	Not Detected	GAGCTTTCAGTCGGA	MIMAT0025179					0
mmu-miR-31-3p	344.553	8.42858	344.553	up	218.404	12.7598	8.60438	0.175801	Detected	Detected	GATGGCAATATGTTGGCAT	MIMAT0004634	chr4	88556546	88556529	+	0
mmu-miR-31-5p	53.4498	5.74011	53.4498	up	1132.47	71.6661	11.0014	5.26128	Detected	Detected	CAGCTATGCCAGCATCT	MIMAT0000538	chr4	88556509	88556494	+	0
mmu-miR-3100-3p	14.9289	3.90004	14.9289	up	9.05936	12.0365	4.03375	0.133706	Detected	Detected	CTGGGAGCGGGTG	MIMAT0014920					0
mmu-miR-3100-5p	-4.07893	-2.02819	4.07893	down	0.1	4.46632	-2.60961	-0.581421	Not Detected	Detected	TCCCAAAGACACCCC	MIMAT0014919					0
mmu-miR-3101-3p	-218.116	-7.76895	218.116	down	0.1	67.7237	-2.60961	5.15934	Not Detected	Detected	AAAGACCATCCACCAAA	MIMAT0014922	chr7	27961098	27961083	+	0
mmu-miR-3101-5p	1.63844	0.712327	1.63844	up	0.1	0.1	-2.60961	-3.32194	Not Detected	Not Detected	CTAGCTTTAGTCAATGGTA	MIMAT0014921	chr7	27961060	27961043	+	0
mmu-miR-3102-3p	-239.361	-7.90304	239.361	down	0.1	73.4088	-2.60961	5.29343	Not Detected	Detected	TGTGGGTAGCCAATGG	MIMAT0014936					0
mmu-miR-3102-3p.2-3p	5.54522	2.47124	5.54522	up	46.2965	28.8827	6.47385	4.00261	Detected	Detected	TGGCTGGGGCAGG	MIMAT0014935					0
mmu-miR-3102-5p	1.39894	0.484332	1.39894	up	629.472	1236.05	10.0072	9.52286	Detected	Detected	CAGCCCCACCCTG	MIMAT0014933	chr7	108030841	108030830	+	0
mmu-miR-3102-5p.2-5p	2.20661	1.14183	2.20661	up	389.249	523.083	9.35918	8.21735	Detected	Detected	GGCTCTCCTGCCTG	MIMAT0014934	chr7	108030862	108030850	+	0
mmu-miR-3103-3p	1.63844	0.712327	1.63844	up	0.1	0.1	-2.60961	-3.32194	Not Detected	Not Detected	CTGTGGGAAGGATCAG	MIMAT0014938	chr7	135431948	135431934	+	0
mmu-miR-3103-5p	1.63844	0.712327	1.63844	up	0.1	0.1	-2.60961	-3.32194	Not Detected	Not Detected	CTAACAGCAGATCCTCC	MIMAT0014937	chr7	135431904	135431889	+	0
mmu-miR-3104-3p	1.34092	0.423218	1.34092	up	15.528	39.2739	4.84941	4.42619	Detected	Detected	TCTGGGGGAGCAAAG	MIMAT0014940					0
mmu-miR-3104-5p	4880.76	12.2529	4880.76	up	1896.65	4.92019	11.7413	-0.511607	Detected	Detected	AGAGGGCTCCGGC	MIMAT0014939					0
mmu-miR-3105-3p	1.63844	0.712327	1.63844	up	0.1	0.1	-2.60961	-3.32194	Not Detected	Not Detected	GGAGTGCAAGCTCATA	MIMAT0014942					0
mmu-miR-3105-5p	1.63844	0.712327	1.63844	up	0.1	0.1	-2.60961	-3.32194	Not Detected	Not Detected	ACGCTGCTTACGGG	MIMAT0014941					0
mmu-miR-3106-3p	1.63844	0.712327	1.63844	up	0.1	0.1	-2.60961	-3.32194	Not Detected	Not Detected	GGAAAGCCCATGTATAGG	MIMAT0014818	chr8	16168827	16168811	+	0
mmu-miR-3106-5p	2165.53	11.0805	2165.53	up	1428.48	13.336	11.2882	0.20766	Detected	Detected	TGGCTGCTTCTAAATGAG	MIMAT0014817	chr8	16168790	16168774	+	0
mmu-miR-3108-3p	1.63844	0.712327	1.63844	up	0.1	0.1	-2.60961	-3.32194	Not Detected	Not Detected	TTGAGACTCTAGACCTAGA	MIMAT0014948	chr8	111460814	111460831	-	0
mmu-miR-3108-5p	1.63844	0.712327	1.63844	up	0.1	0.1	-2.60961	-3.32194	Not Detected	Not Detected	CCGGAACGTCTAGC	MIMAT0014947	chr8	111460780	111460792	-	0
mmu-miR-3109-3p	1.63844	0.712327	1.63844	up	0.1	0.1	-2.60961	-3.32194	Not Detected	Not Detected	TATCTGGATGAGATGGCC	MIMAT0014950	chr9	69304808	69304824	-	0
mmu-miR-3109-5p	1.63844	0.712327	1.63844	up	0.1	0.1	-2.60961	-3.32194	Not Detected	Not Detected	AGCATGGGAACCATCG	MIMAT0014949	chr9	69304774	69304788	-	0
mmu-miR-3110-3p	4.90884	2.29538	4.90884	up	195.346	141.009	8.47521	6.17983	Detected	Detected	GTGTCTGCCTCCGA	MIMAT0014952	chrX	35563674	35563686	-	0
mmu-miR-3110-5p	-6.70436	-2.7451	6.70436	down	0.1	12.0663	-2.60961	0.135489	Not Detected	Detected	GAGCCTTCAGGGGA	MIMAT0014951	chrX	35563638	35563650	-	0
mmu-miR-3112-3p	1.63844	0.712327	1.63844	up	0.1	0.1	-2.60961	-3.32194	Not Detected	Not Detected	AGACAAAGAAGAGACAAAC	MIMAT0014956	chrX	130609908	130609925	-	0
mmu-miR-3112-5p	1.63844	0.712327	1.63844	up	0.1	0.1	-2.60961	-3.32194	Not Detected	Not Detected	TGCAGACTGCCTTTTC	MIMAT0014955	chrX	130609875	130609889	-	0
mmu-miR-3113-3p	1.63844	0.712327	1.63844	up	0.1	0.1	-2.60961	-3.32194	Not Detected	Not Detected	GACCAGGACCAGGG	MIMAT0014960	chrX	148294156	148294168	-	0
mmu-miR-3113-5p	-1.79083	-0.840625	1.79083	down	8.97906	53.7888	4.01347	4.8541	Detected	Detected	GGACCCGGACCAG	MIMAT0014959	chrX	148294128	148294139	-	0
mmu-miR-3154	7.38797	2.88518	7.38797	up	527.913	217.211	9.82228	6.9371	Detected	Detected	TCCGCTCCCGACT	MIMAT0035714					0
mmu-miR-32-3p	1.63844	0.712327	1.63844	up	0.1	0.1	-2.60961	-3.32194	Not Detected	Not Detected	AATATCACACACACTAAATTG	MIMAT0017050	chr4	56908167	56908148	+	0
mmu-miR-32-5p	-8.21267	-3.03785	8.21267	down	1.48548	72.4738	2.23286	5.27071	Detected	Detected	TGCAACTTAGTAATGTGCAA	MIMAT0000654	chr4	56908127	56908109	+	0
mmu-miR-320-3p	2.1835	1.12665	2.1835	up	188.896	290.343	8.44747	7.32083	Detected	Detected	TCGCCCTCTCAAC	MIMAT0000666	chr14	70843374	70843385	-	0
mmu-miR-320-5p	1.63844	0.712327	1.63844	up	0.1	0.1	-2.60961	-3.32194	Not Detected	Not Detected	GGAAGAACCGGGAAG	MIMAT0017057	chr14	70843340	70843353	-	0
mmu-miR-322-3p	68.7215	6.10269	68.7215	up	2.9527	0.1	2.78075	-3.32194	Detected	Not Detected	GTGTTGCAGCGCTT	MIMAT0000549	chrX	50407512	50407500	+	0
mmu-miR-322-5p	2.99164	1.58094	2.99164	up	596.179	615.151	9.96477	8.38383	Detected	Detected	TCCAAAACATGAATTGCTGCTG	MIMAT0000548	chrX	50407475	50407455	+	0
mmu-miR-323-3p	1.63844	0.712327	1.63844	up	0.1	0.1	-2.60961	-3.32194	Not Detected	Not Detected	AGAGGTCGACCGTGTAATGT	MIMAT0000551					0
mmu-miR-323-5p	1.63844	0.712327	1.63844	up	0.1	0.1	-2.60961	-3.32194	Not Detected	Not Detected	GCGAACGCGCCACG	MIMAT0004638					0
mmu-miR-324-3p	1.121	0.164786	1.121	up	50.0222	161.988	6.56458	6.39979	Detected	Detected	AGCAGCACCTGGGGC	MIMAT0000556					0
mmu-miR-324-5p	-3.43283	-1.7794	3.43283	down	68.4891	757.828	6.91687	8.69627	Detected	Detected	ACACCAATGCCCTAGGG	MIMAT0000555					0
mmu-miR-325-3p	1.63844	0.712327	1.63844	up	0.1	0.1	-2.60961	-3.32194	Not Detected	Not Detected	TTGATAGGAGGTGCTCA	MIMAT0004640	chrX	102574495	102574480	+	0
mmu-miR-325-5p	1.63844	0.712327	1.63844	up	0.1	0.1	-2.60961	-3.32194	Not Detected	Not Detected	ACACTTACTGAGCACCTA	MIMAT0000558	chrX	102574458	102574442	+	0
mmu-miR-326-3p	142.946	7.15932	142.946	up	7.82373	0.1	3.83738	-3.32194	Detected	Not Detected	ACTGGAGGAAGGGCCCA	MIMAT0000559	chr7	106700843	106700858	-	0
mmu-miR-326-5p	-1.92733	-0.946607	1.92733	down	8.63802	56.5521	3.97051	4.91711	Detected	Detected	CGCCTTCACAAAGGC	MIMAT0017027	chr7	106700808	106700821	-	0
mmu-miR-327	-1.678	-0.746743	1.678	down	6.83828	38.5067	3.66498	4.41172	Detected	Detected	ATCCTCATGCCCCT	MIMAT0004867					0
mmu-miR-328-3p	79.2444	6.30824	79.2444	up	3.60006	0.1	2.9863	-3.32194	Detected	Not Detected	ACGGAAGGGCAGAGAGGG	MIMAT0000565	chr8	107832345	107832329	+	0
mmu-miR-328-5p	1.40114	0.486604	1.40114	up	282.263	648.308	8.96182	8.47521	Detected	Detected	CCCTGAGCCCCTC	MIMAT0017030	chr8	107832305	107832294	+	0
mmu-miR-329-3p	1.63844	0.712327	1.63844	up	0.1	0.1	-2.60961	-3.32194	Not Detected	Not Detected	AAAAAGGTTAGCTGGGTGTG	MIMAT0000567	chr12	110951754	110951772	-	0
mmu-miR-329-5p	1.63844	0.712327	1.63844	up	0.1	0.1	-2.60961	-3.32194	Not Detected	Not Detected	AACAGAGACCCAGAAAAC	MIMAT0017032	chr12	110951718	110951734	-	0
mmu-miR-33-3p	357.409	8.48143	357.409	up	18.8604	0.1	5.15949	-3.32194	Detected	Not Detected	GTGATGCACTGTGGAA	MIMAT0004666	chr15	82028604	82028618	-	0
mmu-miR-33-5p	1.10434	0.143191	1.10434	up	29.5278	96.905	5.80194	5.65875	Detected	Detected	TGCAATGCAACTACAATGCAC	MIMAT0000667	chr15	82028558	82028577	-	0
mmu-miR-330-3p	2.96546	1.56825	2.96546	up	33.4538	39.407	5.99836	4.4301	Detected	Detected	TCTCTGCAGGCCCT	MIMAT0000569	chr7	19766884	19766896	-	0
mmu-miR-330-5p	1.63844	0.712327	1.63844	up	0.1	0.1	-2.60961	-3.32194	Not Detected	Not Detected	GCCTAAGACACAGGCCC	MIMAT0004642	chr7	19766841	19766856	-	0
mmu-miR-331-3p	-1.01415	-0.0202732	1.01415	down	172.632	556.19	8.26409	8.28437	Detected	Detected	TTCTAGGATAGGCCCAGGG	MIMAT0000571					0
mmu-miR-331-5p	-3.41383	-1.77139	3.41383	down	0.1	3.12854	-2.60961	-0.838219	Not Detected	Detected	GGATCCCTGGGAC	MIMAT0004643					0
mmu-miR-335-3p	-99.5283	-6.63704	99.5283	down	0.1	29.3922	-2.60961	4.02742	Not Detected	Detected	GGTCAGGAGCAATAATGAAAAA	MIMAT0004704					0
mmu-miR-335-5p	-462.887	-8.85452	462.887	down	0.1	147.17	-2.60961	6.2449	Not Detected	Detected	ACATTTTTCGTTATTGCTC	MIMAT0000766					0
mmu-miR-337-3p	1.63844	0.712327	1.63844	up	0.1	0.1	-2.60961	-3.32194	Not Detected	Not Detected	AAAGGCATCATATAGGAGCTG	MIMAT0000578					0
mmu-miR-337-5p	1.63844	0.712327	1.63844	up	0.1	0.1	-2.60961	-3.32194	Not Detected	Not Detected	AATCAACTCCTGCATGAC	MIMAT0004644					0
mmu-miR-338-3p	-6.71182	-2.7467	6.71182	down	0.1	12.0931	-2.60961	0.137092	Not Detected	Detected	CAACAAAATCACTGATGCTGG	MIMAT0000582					0
mmu-miR-338-5p	-4.19556	-2.06886	4.19556	down	1.52008	36.2449	2.25155	4.32041	Detected	Detected	CACTCAGCACCAGGA	MIMAT0004647					0
mmu-miR-339-3p	1.59245	0.671251	1.59245	up	10.8475	23.11	4.29831	3.62706	Detected	Detected	CGGCTCTGTCGCCG	MIMAT0004649					0
mmu-miR-339-5p	8.82401	3.14143	8.82401	up	1.54591	2.97654	2.26729	-0.874146	Detected	Detected	CGTGAGCTCCTGGA	MIMAT0000584					0
mmu-miR-340-3p	-213.931	-7.741	213.931	down	0.1	66.0886	-2.60961	5.13139	Not Detected	Detected	GCTATAAAGTAACTGAGACGGA	MIMAT0000586					0
mmu-miR-340-5p	-414.102	-8.69384	414.102	down	0.1	132.099	-2.60961	6.08423	Not Detected	Detected	AATCAGTCTCATTGCTTTA	MIMAT0004651					0
mmu-miR-341-3p	-11.2553	-3.49253	11.2553	down	30.2824	1094.77	5.84625	9.33878	Detected	Detected	ACCGACCGACCGATC	MIMAT0000588	chr12	110849773	110849786	-	0
mmu-miR-341-5p	1.63844	0.712327	1.63844	up	0.1	0.1	-2.60961	-3.32194	Not Detected	Not Detected	GACCGAGCGATCGG	MIMAT0017037	chr12	110849739	110849751	-	0
mmu-miR-342-3p	-1.04192	-0.0592403	1.04192	down	1032.82	3305.16	10.8175	10.8767	Detected	Detected	ACGGGTGCGATTTCTGT	MIMAT0000590					0
mmu-miR-342-5p	-4.7596	-2.25084	4.7596	down	2.97972	62.2634	2.79008	5.04092	Detected	Detected	CTCAATCACAGATAGCACC	MIMAT0004653					0
mmu-miR-343	1.63844	0.712327	1.63844	up	0.1	0.1	-2.60961	-3.32194	Not Detected	Not Detected	TCTGGGCACATGAAGGGA	MIMAT0004868					0
mmu-miR-344-5p	1.63844	0.712327	1.63844	up	0.1	0.1	-2.60961	-3.32194	Not Detected	Not Detected	CCTGGAATCTAGCCAG	MIMAT0017038	chr7	69022701	69022686	+	0
mmu-miR-344b-3p	-222.494	-7.79762	222.494	down	0.1	68.4012	-2.60961	5.18801	Not Detected	Detected	ACAGTCAGGCTTTGGCT	MIMAT0014926	chr7	68935464	68935448	+	0
mmu-miR-344b-5p	1.63844	0.712327	1.63844	up	0.1	0.1	-2.60961	-3.32194	Not Detected	Not Detected	GAACTTTAGCCAGGAGC	MIMAT0014925	chr7	68935430	68935415	+	0
mmu-miR-344c-3p	1.63844	0.712327	1.63844	up	0.1	0.1	-2.60961	-3.32194	Not Detected	Not Detected	ACTGTCAGGCTTTGACT	MIMAT0014928	chr7	68982276	68982261	+	0
mmu-miR-344c-5p	1.63844	0.712327	1.63844	up	0.1	0.1	-2.60961	-3.32194	Not Detected	Not Detected	GTACTCTAGCCAGCAGC	MIMAT0014927	chr7	68982236	68982221	+	0
mmu-miR-344d-1-5p	1.63844	0.712327	1.63844	up	0.1	0.1	-2.60961	-3.32194	Not Detected	Not Detected	TGGTGTATAGCCAGCAG	MIMAT0014819	chr7	68828036	68828021	+	0
mmu-miR-344d-2-5p	1.63844	0.712327	1.63844	up	0.1	0.1	-2.60961	-3.32194	Not Detected	Not Detected	TGGAATATAGCCAGCAAC	MIMAT0014961	chr7	68830191	68830175	+	0
mmu-miR-344d-3-5p	1.63844	0.712327	1.63844	up	0.1	0.1	-2.60961	-3.32194	Not Detected	Not Detected	GGAGTATAACCACTAGCC	MIMAT0014807	chr7	68871167	68871151	+	0
mmu-miR-344d-3p	1.63844	0.712327	1.63844	up	0.1	0.1	-2.60961	-3.32194	Not Detected	Not Detected	TCAGTCTGGCAGTGG	MIMAT0014808	chr7	68828075	68828061	+	0
mmu-miR-344e-3p	1.63844	0.712327	1.63844	up	0.1	0.1	-2.60961	-3.32194	Not Detected	Not Detected	ATAGTCAGGCTTTGGTTAT	MIMAT0014924	chr7	68880486	68880469	+	0
mmu-miR-344e-5p	1.63844	0.712327	1.63844	up	0.1	0.1	-2.60961	-3.32194	Not Detected	Not Detected	GGAATATAGCCAGAAGCC	MIMAT0014923	chr7	68880446	68880430	+	0
mmu-miR-344f-3p	1.63844	0.712327	1.63844	up	0.1	0.1	-2.60961	-3.32194	Not Detected	Not Detected	GTAGTCAGGTCCTGGC	MIMAT0014932					0
mmu-miR-344f-5p	8.10487	3.01879	8.10487	up	3.41289	8.79406	2.92609	-0.0926993	Detected	Detected	GACTCCAGCCAGGA	MIMAT0014931					0
mmu-miR-344g-3p	1.15295	0.205332	1.15295	up	11.2508	32.2739	4.36884	4.16351	Detected	Detected	TCAAGCCCCTGGCT	MIMAT0014930					0
mmu-miR-344g-5p	-337.081	-8.39695	337.081	down	0.1	103.834	-2.60961	5.78734	Not Detected	Detected	ACTCCTGCCAGGAGC	MIMAT0014929					0
mmu-miR-344h-3p	1.63844	0.712327	1.63844	up	0.1	0.1	-2.60961	-3.32194	Not Detected	Not Detected	ACAGTCGGGCTTTGG	MIMAT0022384					0
mmu-miR-344i	1.22423	0.291872	1.22423	up	38.748	116.91	6.2209	5.92903	Detected	Detected	TCCAGCCAGGAGCC	MIMAT0022503					0
mmu-miR-345-3p	4.8556	2.27965	4.8556	up	1.40645	8.84149	2.19083	-0.0888194	Detected	Detected	GTCTCCAGACCCCT	MIMAT0004656					0
mmu-miR-345-5p	1.12535	0.170376	1.12535	up	66.1431	192.15	6.88367	6.71329	Detected	Detected	AAGCACTGGACTAGGGGT	MIMAT0000595					0
mmu-miR-346-3p	797.588	9.6395	797.588	up	40.6898	0.1	6.31756	-3.32194	Detected	Not Detected	GCTGCAGGCCCAG	MIMAT0017039	chr14	35707858	35707869	-	0
mmu-miR-346-5p	-2.54295	-1.3465	2.54295	down	0.1	1.73593	-2.60961	-1.26311	Not Detected	Detected	AGAGGCAGGCACTCG	MIMAT0000597	chr14	35707819	35707832	-	0
mmu-miR-3470a	-1.73422	-0.794288	1.73422	down	41.614	260.99	6.33629	7.13058	Detected	Detected	CCAGCCTGGTCTACA	MIMAT0015640					0
mmu-miR-3471	1.63844	0.712327	1.63844	up	0.1	0.1	-2.60961	-3.32194	Not Detected	Not Detected	AATGCCTTACAGTTGGAT	MIMAT0015642					0
mmu-miR-3472	-2.7769	-1.47347	2.7769	down	398.66	3321.08	9.4126	10.8861	Detected	Detected	GGTTCCTTCCAGCTT	MIMAT0015643					0
mmu-miR-3473a	-30.1054	-4.91195	30.1054	down	74.4474	7239.86	7.11634	12.0283	Detected	Detected	TGCTGAGCCATCTCTC	MIMAT0015645	chrX	159312925	159312911	+	0
mmu-miR-3473b	-15.3154	-3.93691	15.3154	down	1695.38	83202.7	11.6107	15.5477	Detected	Detected	CTGAGCCATCTCTCCA	MIMAT0020367					0
mmu-miR-3473c	1.37255	0.456854	1.37255	up	26.6683	69.4522	5.67426	5.21741	Detected	Detected	CTTATTATGGGGGCTGG	MIMAT0020614					0
mmu-miR-3473d	1.63844	0.712327	1.63844	up	0.1	0.1	-2.60961	-3.32194	Not Detected	Not Detected	AAGGGCTGGAAAGTGG	MIMAT0020632					0
mmu-miR-3473e	-8.18388	-3.03279	8.18388	down	31.7526	880.841	5.92903	8.96182	Detected	Detected	TACGAGCCATCTCTCC	MIMAT0025587					0
mmu-miR-3473f	-10.7125	-3.42123	10.7125	down	39.4187	1344.73	6.25982	9.68105	Detected	Detected	CATCTCTCCAGTCCTATT	MIMAT0031390					0
mmu-miR-3473g	-1.05221	-0.0734272	1.05221	down	1008.27	3145.12	10.7304	10.8038	Detected	Detected	TCTCCCCAGCCTCA	MIMAT0031427					0
mmu-miR-3474	-3.52038	-1.81573	3.52038	down	15.1303	187.068	4.82236	6.63809	Detected	Detected	GAATCCACGTCTCCTC	MIMAT0015646					0
mmu-miR-3475-3p	1.63844	0.712327	1.63844	up	0.1	0.1	-2.60961	-3.32194	Not Detected	Not Detected	TTCAAACCATGTGCCTC	MIMAT0015219	chrX	140310997	140311012	-	0
mmu-miR-3475-5p	1.63296	0.707488	1.63296	up	34.956	80.7168	6.09824	5.39075	Detected	Detected	CCTCTGTGGGGGTA	MIMAT0026642					0
mmu-miR-34a-3p	1.63844	0.712327	1.63844	up	0.1	0.1	-2.60961	-3.32194	Not Detected	Not Detected	AGGGCAGTATACTTGCT	MIMAT0017022	chr4	149442631	149442646	-	0
mmu-miR-34a-5p	-3.36918	-1.7524	3.36918	down	37.7283	472.065	6.19535	7.94774	Detected	Detected	ACAACCAGCTAAGACACTGC	MIMAT0000542	chr4	149442585	149442603	-	0
mmu-miR-34b-3p	1.63844	0.712327	1.63844	up	0.1	0.1	-2.60961	-3.32194	Not Detected	Not Detected	GATGGCAGTGGAGTTA	MIMAT0004581					0
mmu-miR-34b-5p	-231.346	-7.85391	231.346	down	0.1	70.912	-2.60961	5.24429	Not Detected	Detected	ACAATCAGCTAATTACACTGCC	MIMAT0000382					0
mmu-miR-34c-3p	-3.88984	-1.95971	3.88984	down	0.1	4.06182	-2.60961	-0.649901	Not Detected	Detected	CCTGGCTGTGTGGT	MIMAT0004580	chr9	50911205	50911193	+	0
mmu-miR-34c-5p	-182.783	-7.51399	182.783	down	0.1	55.9748	-2.60961	4.90437	Not Detected	Detected	GCAATCAGCTAACTACACTG	MIMAT0000381	chr9	50911173	50911155	+	0
mmu-miR-350-3p	-2.63452	-1.39754	2.63452	down	230.159	1753.63	8.72093	10.1185	Detected	Detected	GAAAGTGTATGGGCTTTGTG	MIMAT0000605	chr1	178702537	178702519	+	0
mmu-miR-350-5p	1.63844	0.712327	1.63844	up	0.1	0.1	-2.60961	-3.32194	Not Detected	Not Detected	CCCAAAGCGCATGC	MIMAT0017040	chr1	178702497	178702485	+	0
mmu-miR-351-3p	1.5284	0.612023	1.5284	up	21.1577	48.0277	5.30739	4.69537	Detected	Detected	GTTCCCAGGCGCC	MIMAT0017042	chrX	50406509	50406498	+	0
mmu-miR-351-5p	111.76	6.80426	111.76	up	5.75599	0.1	3.48232	-3.32194	Detected	Not Detected	CAGGCTCAAAGGGCTC	MIMAT0000609	chrX	50406470	50406456	+	0
mmu-miR-3535	4.9619	2.31089	4.9619	up	121.886	92.0376	7.89209	5.5812	Detected	Detected	TCTCAGGTAATCAGTCATC	MIMAT0031410					0
mmu-miR-3544-3p	1.74271	0.801333	1.74271	up	13.7004	26.6236	4.67323	3.8719	Detected	Detected	GGGAACGGCGTCA	MIMAT0022354					0
mmu-miR-3544-5p	429.362	8.74605	429.362	up	22.4376	0.1	5.42411	-3.32194	Detected	Not Detected	CAGCTCCTATATGATGCC	MIMAT0022353					0
mmu-miR-3547-3p	1.40791	0.493556	1.40791	up	8.69399	21.6992	3.97587	3.48232	Detected	Detected	CTGAGAGAGGGGTGG	MIMAT0027833					0
mmu-miR-3547-5p	1.09336	0.128775	1.09336	up	181.121	521.566	8.3389	8.21012	Detected	Detected	TCCCGGGCCCC	MIMAT0027832					0
mmu-miR-3552	1.63844	0.712327	1.63844	up	0.1	0.1	-2.60961	-3.32194	Not Detected	Not Detected	AGGGAAGTGGGCCT	MIMAT0035715					0
mmu-miR-3569-3p	1.63844	0.712327	1.63844	up	0.1	0.1	-2.60961	-3.32194	Not Detected	Not Detected	GCTGGAGAGGAGCG	MIMAT0029855					0
mmu-miR-3569-5p	-5.38845	-2.42987	5.38845	down	0.1	7.79444	-2.60961	-0.179741	Not Detected	Detected	CACCGGTCTGCTCT	MIMAT0029854					0
mmu-miR-3572-3p	11.158	3.48001	11.158	up	6.51388	11.9297	3.60729	0.127279	Detected	Detected	CTGGGGAAAGAAGGA	MIMAT0020636	chr7	3607621	3607634	-	0
mmu-miR-3572-5p	1.00836	0.0120077	1.00836	up	33.1888	120.96	5.98976	5.97775	Detected	Detected	GTCCACCTTGCCCT	MIMAT0022986					0
mmu-miR-361-3p	-3.45412	-1.78832	3.45412	down	0.1	3.20281	-2.60961	-0.821295	Not Detected	Detected	ACAAATCAGAATCACACCT	MIMAT0017075	chrX	110188499	110188482	+	0
mmu-miR-361-5p	-8.58	-3.10098	8.58	down	396.995	11399.1	9.40573	12.5067	Detected	Detected	GTACCCCTGGAGATTCT	MIMAT0000704	chrX	110188459	110188444	+	0
mmu-miR-3618-3p	1.63844	0.712327	1.63844	up	0.1	0.1	-2.60961	-3.32194	Not Detected	Not Detected	ATTGCTCTTTTCATTAATGTAG	MIMAT0035717					0
mmu-miR-3618-5p	1.63844	0.712327	1.63844	up	0.1	0.1	-2.60961	-3.32194	Not Detected	Not Detected	GCCTCAATTATTGGAAATC	MIMAT0035716					0
mmu-miR-362-3p	-2.50023	-1.32206	2.50023	down	65.0952	513.143	6.85973	8.18179	Detected	Detected	TGAATCCTTGAACAGGTGTG	MIMAT0004684					0
mmu-miR-362-5p	-2.14883	-1.10355	2.14883	down	13.3022	100.53	4.61028	5.71383	Detected	Detected	ATTCACACCTAGGTTCCA	MIMAT0000706					0
mmu-miR-3620-3p	2.32025	1.21428	2.32025	up	37.2719	59.33	6.17983	4.96555	Detected	Detected	TGGGGTGGGCGG	MIMAT0029879					0
mmu-miR-3620-5p	2.31553	1.21134	2.31553	up	314.244	456.921	9.08555	7.87421	Detected	Detected	TGCTTCCCAGCCCA	MIMAT0029878					0
mmu-miR-363-3p	-12127.5	-13.566	12127.5	down	0.1	3659.27	-2.60961	10.9564	Not Detected	Detected	TACAGATGGATACCGTGCA	MIMAT0000708	chrX	50094940	50094923	+	0
mmu-miR-363-5p	-28.2018	-4.81772	28.2018	down	0.1	14.8224	-2.60961	2.2081	Not Detected	Detected	AAATTGCATCGTGTTCC	MIMAT0017076					0
mmu-miR-365-1-5p	-2.1964	-1.13514	2.1964	down	32.3672	251.044	5.95034	7.08548	Detected	Detected	CACATCTGCCCCCA	MIMAT0017077	chr16	13453958	13453970	-	0
mmu-miR-365-2-5p	144.577	7.17569	144.577	up	1961.57	45.0849	11.7901	4.61441	Detected	Detected	CACAGCTGCCCCT	MIMAT0017179	chr11	79539941	79539952	-	0
mmu-miR-365-3p	1.71337	0.776837	1.71337	up	75.2338	156.969	7.13058	6.35374	Detected	Detected	ATAAGGATTTTTAGGGGCATTA	MIMAT0000711	chr11	79539969	79539990	-	0
mmu-miR-367-3p	-3434.11	-11.7457	3434.11	down	0.1	952.832	-2.60961	9.13611	Not Detected	Detected	TCACCATTGCTAAAGTGCAAT	MIMAT0003181	chr3	127248699	127248718	-	0
mmu-miR-367-5p	1.63844	0.712327	1.63844	up	0.1	0.1	-2.60961	-3.32194	Not Detected	Not Detected	GAGTTGCATGTTAGCAA	MIMAT0017214	chr3	127248664	127248679	-	0
mmu-miR-369-3p	1.63844	0.712327	1.63844	up	0.1	0.1	-2.60961	-3.32194	Not Detected	Not Detected	AAAGATCAACCATGTATTATT	MIMAT0003186					0
mmu-miR-369-5p	1980.69	10.9518	1980.69	up	105.537	0.1	7.62985	-3.32194	Detected	Not Detected	GCGAATATAACACGGTCGAT	MIMAT0003185					0
mmu-miR-370-3p	-6.11054	-2.6113	6.11054	down	34.2943	732.84	6.0574	8.6687	Detected	Detected	ACCAGGTTCCACCCC	MIMAT0001095	chr12	110856523	110856536	-	0
mmu-miR-370-5p	1.63844	0.712327	1.63844	up	0.1	0.1	-2.60961	-3.32194	Not Detected	Not Detected	AACTGCAGAGACGTGA	MIMAT0017174	chr12	110856485	110856499	-	0
mmu-miR-374b-3p	1.63844	0.712327	1.63844	up	0.1	0.1	-2.60961	-3.32194	Not Detected	Not Detected	CTCGGACAATGATAATACAACC	MIMAT0003728	chrX	100768478	100768457	+	0
mmu-miR-374c-3p	1.63844	0.712327	1.63844	up	0.1	0.1	-2.60961	-3.32194	Not Detected	Not Detected	ATAATACAACCTGCTAAGT	MIMAT0014954	chrX	100768453	100768470	-	0
mmu-miR-374c-5p	-1.47139	-0.557182	1.47139	down	49.7757	258.59	6.55915	7.11634	Detected	Detected	CACTTAGCAGGTTGTATT	MIMAT0014953	chrX	100768427	100768444	-	0
mmu-miR-375-3p	1.63844	0.712327	1.63844	up	0.1	0.1	-2.60961	-3.32194	Not Detected	Not Detected	TCACGCGAGCCGAACG	MIMAT0000739	chr1	74947292	74947278	+	0
mmu-miR-375-5p	-5.5629	-2.47584	5.5629	down	0.1	8.30729	-2.60961	-0.133775	Not Detected	Detected	GTTTGTGCGAGGGG	MIMAT0017078	chr1	74947257	74947245	+	0
mmu-miR-376a-3p	441.595	8.78658	441.595	up	22.8129	0.1	5.46464	-3.32194	Detected	Not Detected	ACGTGGATTTTCCTCTA	MIMAT0000740	chr12	110962039	110962054	-	0
mmu-miR-376a-5p	1.63844	0.712327	1.63844	up	0.1	0.1	-2.60961	-3.32194	Not Detected	Not Detected	ACTCATAGAAGGAGAATCTACC	MIMAT0003387	chr12	110961997	110962017	-	0
mmu-miR-376b-3p	1.63844	0.712327	1.63844	up	0.1	0.1	-2.60961	-3.32194	Not Detected	Not Detected	AAGTGGATGTTCCTCTAT	MIMAT0001092	chr12	110961722	110961738	-	0
mmu-miR-376b-5p	1.63844	0.712327	1.63844	up	0.1	0.1	-2.60961	-3.32194	Not Detected	Not Detected	TAACCATAGAAGGAATATCCAC	MIMAT0003388	chr12	110961682	110961702	-	0
mmu-miR-376c-3p	1.63844	0.712327	1.63844	up	0.1	0.1	-2.60961	-3.32194	Not Detected	Not Detected	ACGTGAAATTTCCTCTATGTT	MIMAT0003183	chr12	110960981	110961000	-	0
mmu-miR-376c-5p	1.63844	0.712327	1.63844	up	0.1	0.1	-2.60961	-3.32194	Not Detected	Not Detected	TAAACATAGAAGGAATATCCAC	MIMAT0005295	chr12	110960944	110960964	-	0
mmu-miR-377-3p	1.63844	0.712327	1.63844	up	0.1	0.1	-2.60961	-3.32194	Not Detected	Not Detected	ACAAAAGTTGCCTTTGTGTG	MIMAT0000741	chr12	110978766	110978784	-	0
mmu-miR-377-5p	1.63844	0.712327	1.63844	up	0.1	0.1	-2.60961	-3.32194	Not Detected	Not Detected	GAATTCACCAAGGGCA	MIMAT0017079	chr12	110978732	110978746	-	0
mmu-miR-378a-3p	-2.61145	-1.38485	2.61145	down	111.812	951.576	7.74298	9.12783	Detected	Detected	CCTTCTGACTCCAA	MIMAT0003151	chr18	61557551	61557538	+	0
mmu-miR-378a-5p	-79.745	-6.31732	79.745	down	0.1	24.1472	-2.60961	3.70771	Not Detected	Detected	ACACAGGACCTGGAGTCA	MIMAT0000742	chr18	61557514	61557497	+	0
mmu-miR-378b	-5.63685	-2.49489	5.63685	down	63.7428	1053.09	6.81473	9.30962	Detected	Detected	TCTTCTGACTCCAAGTC	MIMAT0019348					0
mmu-miR-378c	-2.27031	-1.18289	2.27031	down	9.82608	74.6498	4.13177	5.31466	Detected	Detected	GCTTCTGACTCCAAGT	MIMAT0025138					0
mmu-miR-378d	-4.63111	-2.21136	4.63111	down	69.6892	975.811	6.9575	9.16886	Detected	Detected	ACCTTCTGACTCCAAGG	MIMAT0025167					0
mmu-miR-379-3p	1.63844	0.712327	1.63844	up	0.1	0.1	-2.60961	-3.32194	Not Detected	Not Detected	AGTTAGTGGACCATGTTAC	MIMAT0017080	chr12	110947316	110947333	-	0
mmu-miR-379-5p	1.63844	0.712327	1.63844	up	0.1	0.1	-2.60961	-3.32194	Not Detected	Not Detected	CCTACGTTCCATAGTC	MIMAT0000743	chr12	110947281	110947295	-	0
mmu-miR-380-3p	1.63844	0.712327	1.63844	up	0.1	0.1	-2.60961	-3.32194	Not Detected	Not Detected	AAGATGTGGACCATACTACATA	MIMAT0000745					0
mmu-miR-380-5p	-5.57207	-2.47821	5.57207	down	0.1	8.33469	-2.60961	-0.1314	Not Detected	Detected	CGCATGTTCTATGGTCA	MIMAT0000744					0
mmu-miR-381-3p	1.63844	0.712327	1.63844	up	0.1	0.1	-2.60961	-3.32194	Not Detected	Not Detected	ACAGAGAGCTTGCCC	MIMAT0000746	chr12	110965088	110965101	-	0
mmu-miR-381-5p	1.63844	0.712327	1.63844	up	0.1	0.1	-2.60961	-3.32194	Not Detected	Not Detected	AATATACAAAGGGCAACCT	MIMAT0017081	chr12	110965044	110965061	-	0
mmu-miR-382-3p	1.63844	0.712327	1.63844	up	0.1	0.1	-2.60961	-3.32194	Not Detected	Not Detected	AAAAAGTGTTGTCCGTGAATGA	MIMAT0004691	chr12	110972030	110972050	-	0
mmu-miR-382-5p	-1.62645	-0.701728	1.62645	down	10.6151	59.0116	4.25918	4.96091	Detected	Detected	CGAATCCACCACGAACA	MIMAT0000747	chr12	110971997	110972012	-	0
mmu-miR-383-3p	1.63844	0.712327	1.63844	up	0.1	0.1	-2.60961	-3.32194	Not Detected	Not Detected	TCTGACCAGGCAGTG	MIMAT0017082	chr8	39315251	39315238	+	0
mmu-miR-383-5p	19.388	4.27709	19.388	up	6.56947	4.02548	3.62071	-0.656384	Detected	Detected	AGCCACAGTCACCTT	MIMAT0000748	chr8	39315211	39315198	+	0
mmu-miR-384-3p	1.63844	0.712327	1.63844	up	0.1	0.1	-2.60961	-3.32194	Not Detected	Not Detected	ATTGTGAACAATTTCTAGGAAT	MIMAT0001076					0
mmu-miR-384-5p	1.63844	0.712327	1.63844	up	0.1	0.1	-2.60961	-3.32194	Not Detected	Not Detected	ACATTGCCTAGGAATTGTT	MIMAT0004745					0
mmu-miR-3960	3.25234	1.70148	3.25234	up	5166.04	6699.99	13.5668	11.8653	Detected	Detected	CCCCCGCCTCCG	MIMAT0019336					0
mmu-miR-3961	1.63844	0.712327	1.63844	up	0.1	0.1	-2.60961	-3.32194	Not Detected	Not Detected	TCCAACTGAGCTGAGG	MIMAT0019338					0
mmu-miR-3962	1.63844	0.712327	1.63844	up	0.1	0.1	-2.60961	-3.32194	Not Detected	Not Detected	AAATGTACAAACTACTACCT	MIMAT0019340					0
mmu-miR-3963	8.04841	3.0087	8.04841	up	37180.8	15499	15.9437	12.935	Detected	Detected	GTGTCAGAAGTGGGAT	MIMAT0019341					0
mmu-miR-3964	1.63844	0.712327	1.63844	up	0.1	0.1	-2.60961	-3.32194	Not Detected	Not Detected	TTTAGTGCTTTCTACCTTAT	MIMAT0019344					0
mmu-miR-3965	90.0286	6.49231	90.0286	up	4.27173	0.1	3.17037	-3.32194	Detected	Not Detected	AACATCAGGCTGATAAGC	MIMAT0019347					0
mmu-miR-3966	1.63844	0.712327	1.63844	up	0.1	0.1	-2.60961	-3.32194	Not Detected	Not Detected	ACAGTTCTACAGCTGGC	MIMAT0019350					0
mmu-miR-3967	1.63844	0.712327	1.63844	up	0.1	0.1	-2.60961	-3.32194	Not Detected	Not Detected	CAACATCAGTCAGACAA	MIMAT0019351					0
mmu-miR-3968	13.1475	3.71671	13.1475	up	1738.27	470.12	11.6403	7.9236	Detected	Detected	TGGTGTCTGGAGTGG	MIMAT0019352					0
mmu-miR-3969	1.63844	0.712327	1.63844	up	0.1	0.1	-2.60961	-3.32194	Not Detected	Not Detected	TAGTGATTTCTACTTTAGGG	MIMAT0019353					0
mmu-miR-3970	1.63844	0.712327	1.63844	up	0.1	0.1	-2.60961	-3.32194	Not Detected	Not Detected	AAAGCACAAACTACAACC	MIMAT0019355					0
mmu-miR-3971	-7.25376	-2.85873	7.25376	down	0.1	14.1248	-2.60961	0.249117	Not Detected	Detected	TCACTGGTACAGGGGT	MIMAT0019356					0
mmu-miR-409-3p	-6.6264	-2.72823	6.6264	down	0.1	11.7873	-2.60961	0.118614	Not Detected	Detected	AGGGGTTCACCGAGCA	MIMAT0001090					0
mmu-miR-409-5p	1.63844	0.712327	1.63844	up	0.1	0.1	-2.60961	-3.32194	Not Detected	Not Detected	ATGCAAAGTTGCTCGGGTA	MIMAT0004746					0
mmu-miR-410-3p	1.63844	0.712327	1.63844	up	0.1	0.1	-2.60961	-3.32194	Not Detected	Not Detected	ACAGGCCATCTGTGTTATA	MIMAT0001091	chr12	110981977	110981994	-	0
mmu-miR-410-5p	1.63844	0.712327	1.63844	up	0.1	0.1	-2.60961	-3.32194	Not Detected	Not Detected	CGAACTCATCACAGAC	MIMAT0017172	chr12	110981945	110981959	-	0
mmu-miR-411-3p	1.63844	0.712327	1.63844	up	0.1	0.1	-2.60961	-3.32194	Not Detected	Not Detected	GGTTAGTGGACCGTGTT	MIMAT0001093	chr12	110948441	110948456	-	0
mmu-miR-411-5p	1.63844	0.712327	1.63844	up	0.1	0.1	-2.60961	-3.32194	Not Detected	Not Detected	CGTACGCTATACGGTCTA	MIMAT0004747	chr12	110948404	110948420	-	0
mmu-miR-412-3p	1.63844	0.712327	1.63844	up	0.1	0.1	-2.60961	-3.32194	Not Detected	Not Detected	CGGCTAGTGGACCAG	MIMAT0001094	chr12	110981556	110981569	-	0
mmu-miR-412-5p	1.63844	0.712327	1.63844	up	0.1	0.1	-2.60961	-3.32194	Not Detected	Not Detected	ATTACTTTCCAGCTGGTC	MIMAT0017173					0
mmu-miR-421-3p	1.97258	0.980082	1.97258	up	21.2143	36.51	5.30963	4.32954	Detected	Detected	GCGCCCAATTAATGTCTG	MIMAT0004869	chrX	100768326	100768310	+	0
mmu-miR-421-5p	1.63844	0.712327	1.63844	up	0.1	0.1	-2.60961	-3.32194	Not Detected	Not Detected	ATTCAACAAACATTTAATGAG	MIMAT0017273	chrX	100768290	100768271	+	0
mmu-miR-423-3p	-3.83518	-1.93929	3.83518	down	12.4079	168.45	4.5048	6.4441	Detected	Detected	ACTGAGGGGCCTCA	MIMAT0003454					0
mmu-miR-423-5p	4.2587	2.09041	4.2587	up	513.965	391.055	9.78023	7.68982	Detected	Detected	AAAGTCTCGCTCTCTGC	MIMAT0004825					0
mmu-miR-425-3p	-4.35364	-2.12222	4.35364	down	0.1	5.08817	-2.60961	-0.487391	Not Detected	Detected	GGCGGACACGACATT	MIMAT0001342	chr9	108471168	108471181	-	0
mmu-miR-425-5p	-1.58412	-0.663684	1.58412	down	188.806	942.758	8.44005	9.10374	Detected	Detected	TCAACGGGAGTGATCGTG	MIMAT0004750	chr9	108471126	108471142	-	0
mmu-miR-429-3p	-1.57918	-0.659178	1.57918	down	42.8275	244.023	6.36874	7.02792	Detected	Detected	ACGGCATTACCAGACAGTA	MIMAT0001537	chr4	155428085	155428068	+	0
mmu-miR-429-5p	1.63844	0.712327	1.63844	up	0.1	0.1	-2.60961	-3.32194	Not Detected	Not Detected	TCTAACCATGTCTGGTAAG	MIMAT0017178	chr4	155428047	155428030	+	0
mmu-miR-431-3p	-104.132	-6.70227	104.132	down	0.1	30.6953	-2.60961	4.09266	Not Detected	Detected	AGAAGCCCTGCAAGACG	MIMAT0004753	chr12	110828718	110828733	-	0
mmu-miR-431-5p	1.63844	0.712327	1.63844	up	0.1	0.1	-2.60961	-3.32194	Not Detected	Not Detected	TGCATGACGGCCTGC	MIMAT0001418	chr12	110828676	110828689	-	0
mmu-miR-432	24.0368	4.58718	24.0368	up	698.939	89.0527	10.1088	5.52166	Detected	Detected	CTGCCCACTGATCTAC	MIMAT0012771					0
mmu-miR-433-3p	1.63844	0.712327	1.63844	up	0.1	0.1	-2.60961	-3.32194	Not Detected	Not Detected	ACACCGAGGAGCCC	MIMAT0001420	chr12	110830000	110830012	-	0
mmu-miR-433-5p	-1.31235	-0.392158	1.31235	down	6.66805	29.6114	3.64159	4.03375	Detected	Detected	GAATAATGACAGGCTCACCGT	MIMAT0001419	chr12	110829941	110829960	-	0
mmu-miR-434-3p	1.63844	0.712327	1.63844	up	0.1	0.1	-2.60961	-3.32194	Not Detected	Not Detected	AGGAGTCGAGTGATGGTT	MIMAT0001422					0
mmu-miR-434-5p	1.63844	0.712327	1.63844	up	0.1	0.1	-2.60961	-3.32194	Not Detected	Not Detected	TGGTTCAAACCATGAGTCG	MIMAT0001421					0
mmu-miR-448-3p	1.63844	0.712327	1.63844	up	0.1	0.1	-2.60961	-3.32194	Not Detected	Not Detected	ATGGGACATCCTACATATGCA	MIMAT0001533	chrX	143592826	143592845	-	0
mmu-miR-448-5p	1.63844	0.712327	1.63844	up	0.1	0.1	-2.60961	-3.32194	Not Detected	Not Detected	GGCAGCACTATGCAG	MIMAT0017176					0
mmu-miR-449a-3p	-106.994	-6.74138	106.994	down	0.1	31.2747	-2.60961	4.13177	Not Detected	Detected	GAGAGCAGTCGCATG	MIMAT0017180	chr13	113827805	113827818	-	0
mmu-miR-449a-5p	-5.78921	-2.53337	5.78921	down	0.1	8.99697	-2.60961	-0.0762444	Not Detected	Detected	ACCAGCTAACAATACACTGC	MIMAT0001542	chr13	113827760	113827778	-	0
mmu-miR-449b	1.63844	0.712327	1.63844	up	0.1	0.1	-2.60961	-3.32194	Not Detected	Not Detected	GCCAGCTAACAACACTGC	MIMAT0005447					0
mmu-miR-449c-3p	1.63844	0.712327	1.63844	up	0.1	0.1	-2.60961	-3.32194	Not Detected	Not Detected	AGGGTAGTGCAGCTAGC	MIMAT0022715					0
mmu-miR-449c-5p	1.63844	0.712327	1.63844	up	0.1	0.1	-2.60961	-3.32194	Not Detected	Not Detected	CCAGCTAGCAATGCAC	MIMAT0003460	chr13	113826222	113826236	-	0
mmu-miR-450a-1-3p	1.63844	0.712327	1.63844	up	0.1	0.1	-2.60961	-3.32194	Not Detected	Not Detected	ATTTATGCAAAATGTTCCCA	MIMAT0017182	chrX	50401404	50401386	+	0
mmu-miR-450a-2-3p	-1.28545	-0.362276	1.28545	down	4.53083	22.4376	3.22818	3.59046	Detected	Detected	ATGAATGCAAAGCATCCCCA	MIMAT0004789	chrX	50401539	50401520	+	0
mmu-miR-450a-5p	22.8808	4.51607	22.8808	up	13.4004	11.5642	4.6209	0.104834	Detected	Detected	ATATTAGGAACACATCGCAA	MIMAT0001546	chrX	50401369	50401350	+	0
mmu-miR-450b-3p	27.1182	4.76119	27.1182	up	17.4061	14.7372	5.04092	0.279729	Detected	Detected	ATGCATGCAAAATGTTCCCAA	MIMAT0003512					0
mmu-miR-450b-5p	12.8605	3.68488	12.8605	up	3.52996	3.65199	2.95825	-0.726623	Detected	Detected	TATTCAGGAACATACTGCAAAA	MIMAT0003511					0
mmu-miR-451a	-1.76815	-0.82224	1.76815	down	16.4372	103.703	4.96091	5.78315	Detected	Detected	AACTCAGTAATGGTAACGGTTT	MIMAT0001632	chr11	77886689	77886709	-	0
mmu-miR-451b	-29.064	-4.86116	29.064	down	0.1	14.9177	-2.60961	2.25155	Not Detected	Detected	ACGGTTCTCTTGCTGC	MIMAT0025178					0
mmu-miR-452-3p	1.63844	0.712327	1.63844	up	0.1	0.1	-2.60961	-3.32194	Not Detected	Not Detected	ACCTCTTTGCAGATGAG	MIMAT0017194					0
mmu-miR-452-5p	-1.77283	-0.826056	1.77283	down	24.0165	159.456	5.54268	6.36874	Detected	Detected	GTCTCAGTTTCCTCTGCA	MIMAT0001637	chrX	69507600	69507584	+	0
mmu-miR-453	1.63844	0.712327	1.63844	up	0.1	0.1	-2.60961	-3.32194	Not Detected	Not Detected	TGCAAGCTCACTATGAGGC	MIMAT0004870					0
mmu-miR-455-3p	63.0803	5.97912	63.0803	up	31.4135	9.02529	5.90514	-0.0739775	Detected	Detected	GTGTATATGCCCGTGG	MIMAT0003742	chr4	62917944	62917958	-	0
mmu-miR-455-5p	12.2248	3.61174	12.2248	up	5.31963	7.5397	3.40803	-0.20371	Detected	Detected	CGATGTAGTCCAAAGGCA	MIMAT0003485	chr4	62917906	62917922	-	0
mmu-miR-463-3p	1.63844	0.712327	1.63844	up	0.1	0.1	-2.60961	-3.32194	Not Detected	Not Detected	CTACCTTATATGGTGTCTA	MIMAT0004758	chrX	64052459	64052442	+	0
mmu-miR-463-5p	1.63844	0.712327	1.63844	up	0.1	0.1	-2.60961	-3.32194	Not Detected	Not Detected	ATGATGGACAACAAATTAGGTA	MIMAT0002104	chrX	64052422	64052402	+	0
mmu-miR-465a-3p	-164.748	-7.36412	164.748	down	0.1	50.2064	-2.60961	4.7545	Not Detected	Detected	TCTACTTAGAAAGGCCCTG	MIMAT0004217					0
mmu-miR-465a-5p	1.63844	0.712327	1.63844	up	0.1	0.1	-2.60961	-3.32194	Not Detected	Not Detected	TCACATCAGTGCCAT	MIMAT0002106					0
mmu-miR-465b-5p	-2.71174	-1.43922	2.71174	down	0.1	1.97403	-2.60961	-1.17039	Not Detected	Detected	CAGATCAGCACCATTC	MIMAT0004871					0
mmu-miR-465c-5p	1.63844	0.712327	1.63844	up	0.1	0.1	-2.60961	-3.32194	Not Detected	Not Detected	CAGATCAGCGCCAT	MIMAT0004873					0
mmu-miR-465d-3p	1.63844	0.712327	1.63844	up	0.1	0.1	-2.60961	-3.32194	Not Detected	Not Detected	TTACTCAGAAAGGCCCT	MIMAT0029881					0
mmu-miR-465d-5p	1.63844	0.712327	1.63844	up	0.1	0.1	-2.60961	-3.32194	Not Detected	Not Detected	TCACATCAGTACCATTCTAA	MIMAT0029880					0
mmu-miR-466a-5p	-3.33592	-1.73809	3.33592	down	0.1	2.98737	-2.60961	-0.871526	Not Detected	Detected	TATGTACATGTACACACACAT	MIMAT0004759					0
mmu-miR-466b-3p	-12511.8	-13.611	12511.8	down	0.1	3710.85	-2.60961	11.0014	Not Detected	Detected	TCTTATGTGTGCGTGTA	MIMAT0004876	chr2	10395901	10395917	-	0
mmu-miR-466c-5p	-425.183	-8.73194	425.183	down	0.1	135.402	-2.60961	6.12233	Not Detected	Detected	ATATGTACATGCACACACA	MIMAT0004877					0
mmu-miR-466d-3p	-284.502	-8.1523	284.502	down	0.1	90.473	-2.60961	5.54268	Not Detected	Detected	CTATGTGTGCGTGTAT	MIMAT0004931					0
mmu-miR-466d-5p	1.63844	0.712327	1.63844	up	0.1	0.1	-2.60961	-3.32194	Not Detected	Not Detected	CATGTACATGTACGCACA	MIMAT0004930					0
mmu-miR-466f-3p	-5.46601	-2.45049	5.46601	down	24.0928	485.492	5.54643	7.99692	Detected	Detected	GTGTGTATGTGTGTGTG	MIMAT0004882					0
mmu-miR-466f-5p	-48.7027	-5.60593	48.7027	down	0.1	17.4632	-2.60961	2.99632	Not Detected	Detected	CATGCACATGCACACAC	MIMAT0004881					0
mmu-miR-466g	-11.3205	-3.50087	11.3205	down	4.78086	198.014	3.2867	6.78757	Detected	Detected	TGTGTGTGCATGTGTC	MIMAT0004883					0
mmu-miR-466h-3p	-4.70246	-2.23342	4.70246	down	113.648	1676.19	7.75956	9.99298	Detected	Detected	GTGTGTGTGTGCGT	MIMAT0017274					0
mmu-miR-466h-5p	-162.609	-7.34527	162.609	down	0.1	49.3166	-2.60961	4.73566	Not Detected	Detected	TACACACAAGCACATGCAC	MIMAT0004884	chr2	10436532	10436549	-	0
mmu-miR-466i-3p	-7.5886	-2.92383	7.5886	down	29.4815	773.559	5.7971	8.72093	Detected	Detected	TAGTGTGTATGTGTGTGTG	MIMAT0005834	chr13	17839390	17839407	-	0
mmu-miR-466i-5p	1.35177	0.434852	1.35177	up	134.002	345.845	7.99074	7.55588	Detected	Detected	CACACACACACACACA	MIMAT0017325					0
mmu-miR-466j	-5.60548	-2.48684	5.60548	down	0.1	8.43496	-2.60961	-0.122773	Not Detected	Detected	TTACACACATGCACATGC	MIMAT0005848					0
mmu-miR-466k	1.63844	0.712327	1.63844	up	0.1	0.1	-2.60961	-3.32194	Not Detected	Not Detected	TCACATGTACATGTACACA	MIMAT0005845					0
mmu-miR-466l-3p	1.63844	0.712327	1.63844	up	0.1	0.1	-2.60961	-3.32194	Not Detected	Not Detected	AATATGTGTGCATGTATTTATA	MIMAT0005830	chr2	10437784	10437804	-	0
mmu-miR-466l-5p	1.63844	0.712327	1.63844	up	0.1	0.1	-2.60961	-3.32194	Not Detected	Not Detected	ATACATGTACATGTACACACA	MIMAT0017322					0
mmu-miR-466m-3p	-542.494	-9.08346	542.494	down	0.1	170.647	-2.60961	6.47385	Not Detected	Detected	TGCGTGTGTATGTGTG	MIMAT0014883					0
mmu-miR-466m-5p	-217.707	-7.76625	217.707	down	0.1	67.4863	-2.60961	5.15664	Not Detected	Detected	ATACACACATGCACATGC	MIMAT0014882					0
mmu-miR-466n-3p	-2281.85	-11.156	2281.85	down	0.1	671.185	-2.60961	8.54637	Not Detected	Detected	TCTATGTATGCTCTCATGTAT	MIMAT0014894					0
mmu-miR-466n-5p	1.63844	0.712327	1.63844	up	0.1	0.1	-2.60961	-3.32194	Not Detected	Not Detected	ACATGTACATGTACGCAC	MIMAT0014893					0
mmu-miR-466o-3p	-65.1902	-6.02658	65.1902	down	0.1	21.3074	-2.60961	3.41697	Not Detected	Detected	GTCTTATGTGTGCATGTAT	MIMAT0014886					0
mmu-miR-466p-5p	-7.22199	-2.8524	7.22199	down	0.1	14.0014	-2.60961	0.242784	Not Detected	Detected	ATGTACATGTACACACACA	MIMAT0014891					0
mmu-miR-466q	-5.59854	-2.48505	5.59854	down	51.2602	939.246	6.6005	9.08555	Detected	Detected	ACGTATGTGTGTGTGTG	MIMAT0020631					0
mmu-miR-467a-3p	-21901	-14.4187	21901	down	0.1	6518.64	-2.60961	11.8091	Not Detected	Detected	TGTAGGTGTGTGTATGTATA	MIMAT0002108	chr2	10398019	10398038	-	0
mmu-miR-467a-5p	-1857.21	-10.8589	1857.21	down	0.1	540.343	-2.60961	8.24931	Not Detected	Detected	CGCATATACATGCAGGCA	MIMAT0003409	chr2	10397986	10398003	-	0
mmu-miR-467b-3p	-91.2046	-6.51103	91.2046	down	0.1	27.2849	-2.60961	3.90142	Not Detected	Detected	GTGTTGGTGTGTGTAT	MIMAT0003478	chr2	10402927	10402941	-	0
mmu-miR-467b-5p	-8046.25	-12.9741	8046.25	down	0.1	2145.38	-2.60961	10.3645	Not Detected	Detected	CATATACATGCAGGCACT	MIMAT0005448	chr2	10402887	10402903	-	0
mmu-miR-467c-3p	-354.119	-8.46809	354.119	down	0.1	110.775	-2.60961	5.85848	Not Detected	Detected	GTATAGGTGTGTGTATGTATA	MIMAT0017275	chr2	10395606	10395625	-	0
mmu-miR-467c-5p	-3171.44	-11.6309	3171.44	down	0.1	905.01	-2.60961	9.02131	Not Detected	Detected	CACATATACATGCACGCAC	MIMAT0004885	chr2	10395572	10395589	-	0
mmu-miR-467d-3p	-4671.04	-12.1895	4671.04	down	0.1	1245.42	-2.60961	9.57992	Not Detected	Detected	GTGTAGGTGTGTGTATG	MIMAT0004887	chr2	10398023	10398039	-	0
mmu-miR-467d-5p	1.63844	0.712327	1.63844	up	0.1	0.1	-2.60961	-3.32194	Not Detected	Not Detected	CGCATATACATGCGCGC	MIMAT0004886	chr2	10429273	10429288	-	0
mmu-miR-467e-3p	-168.77	-7.39891	168.77	down	0.1	51.5207	-2.60961	4.7893	Not Detected	Detected	ATATAGGTGTGTGTATGTATA	MIMAT0005294	chr2	10427397	10427416	-	0
mmu-miR-467e-5p	-4817.35	-12.234	4817.35	down	0.1	1284.95	-2.60961	9.62441	Not Detected	Detected	ACATATACATGCTCACACT	MIMAT0005293	chr2	10427362	10427379	-	0
mmu-miR-467f	-6.20095	-2.63249	6.20095	down	99.5514	1770.91	7.50327	10.1358	Detected	Detected	TGTAGGTGTGTGTGTGT	MIMAT0005846					0
mmu-miR-467g	-42.5209	-5.4101	42.5209	down	0.1	16.1141	-2.60961	2.80049	Not Detected	Detected	ATATATGTGTGTGTATGTATA	MIMAT0005854					0
mmu-miR-468-3p	-6.02971	-2.59209	6.02971	down	0.1	9.76	-2.60961	-0.0175234	Not Detected	Detected	CAGACACACGCACATCA	MIMAT0002109	chr6	81846667	81846652	+	0
mmu-miR-468-5p	1.63844	0.712327	1.63844	up	0.1	0.1	-2.60961	-3.32194	Not Detected	Not Detected	ACTGAGTTTCTTATCAGTACA	MIMAT0022699					0
mmu-miR-470-3p	-61.6152	-5.94521	61.6152	down	0.1	20.7884	-2.60961	3.3356	Not Detected	Detected	TCTTCTCAGAAAGGTACTGG	MIMAT0004760	chrX	64067190	64067172	+	0
mmu-miR-470-5p	-102.336	-6.67716	102.336	down	0.1	30.0007	-2.60961	4.06755	Not Detected	Detected	ACTCACCAGTGCCAG	MIMAT0002111	chrX	64067156	64067143	+	0
mmu-miR-471-3p	1.63844	0.712327	1.63844	up	0.1	0.1	-2.60961	-3.32194	Not Detected	Not Detected	ATACATAGTATGGCACCTTT	MIMAT0017195					0
mmu-miR-471-5p	1.63844	0.712327	1.63844	up	0.1	0.1	-2.60961	-3.32194	Not Detected	Not Detected	GTGAAAAGCACTATACTACGTA	MIMAT0002112	chrX	64045797	64045777	+	0
mmu-miR-483-3p	1.39202	0.477177	1.39202	up	11.7687	28.1261	4.42619	3.94901	Detected	Detected	AAGACGGGAGGGGAGGAG	MIMAT0003120	chr7	149840893	149840877	+	0
mmu-miR-483-5p	13.0658	3.70772	13.0658	up	1069.68	265.18	10.8767	7.16901	Detected	Detected	CTCCCTTCTCTTC	MIMAT0004782	chr7	149840857	149840846	+	0
mmu-miR-484	3.22882	1.69101	3.22882	up	40.5659	45.1795	6.31191	4.6209	Detected	Detected	ATCGGGAGGGGACTGA	MIMAT0003127					0
mmu-miR-485-3p	1.63844	0.712327	1.63844	up	0.1	0.1	-2.60961	-3.32194	Not Detected	Not Detected	GAGAGGAGAGCCGTGT	MIMAT0003129	chr12	110973163	110973177	-	0
mmu-miR-485-5p	1.63844	0.712327	1.63844	up	0.1	0.1	-2.60961	-3.32194	Not Detected	Not Detected	GAATTCATCACGGCCAGC	MIMAT0003128	chr12	110973125	110973141	-	0
mmu-miR-486a-3p	130.658	7.02965	130.658	up	7.06965	0.1	3.70771	-3.32194	Detected	Not Detected	ATCCTGTACTGAGCTGC	MIMAT0017206	chr8	24253105	24253121	-	0
mmu-miR-486a-5p	-1.00187	-0.00269842	1.00187	down	14.2043	49.2927	4.72386	4.72656	Detected	Detected	CTCGGGGCAGCTCA	MIMAT0003130	chr8	24253067	24253080	-	0
mmu-miR-486b-3p	6.70113	2.7444	6.70113	up	3.53387	13.5872	2.96553	0.221123	Detected	Detected	TCCTGTACTGAGCTGC	MIMAT0014944	chr8	24253120	24253105	+	0
mmu-miR-487b-3p	31.9276	4.99673	31.9276	up	14.8427	7.51689	4.79084	-0.205896	Detected	Detected	AAGTGGATGACCCTGTAC	MIMAT0003184	chr12	110965597	110965613	-	0
mmu-miR-487b-5p	1.63844	0.712327	1.63844	up	0.1	0.1	-2.60961	-3.32194	Not Detected	Not Detected	CGAAGAGGACAGGGA	MIMAT0017216	chr12	110965564	110965577	-	0
mmu-miR-488-3p	1.63844	0.712327	1.63844	up	0.1	0.1	-2.60961	-3.32194	Not Detected	Not Detected	GACCAAGAAACAGCCTTTCA	MIMAT0003450	chr1	160435822	160435840	-	0
mmu-miR-488-5p	1.63844	0.712327	1.63844	up	0.1	0.1	-2.60961	-3.32194	Not Detected	Not Detected	TTGAGAGTGCTATTATCTGG	MIMAT0003449	chr1	160435784	160435802	-	0
mmu-miR-489-3p	-5.96349	-2.57616	5.96349	down	0.1	9.54679	-2.60961	-0.0334561	Not Detected	Detected	GCTGCCATATATGTGGT	MIMAT0003112	chr6	3671978	3671963	+	0
mmu-miR-489-5p	1.63844	0.712327	1.63844	up	0.1	0.1	-2.60961	-3.32194	Not Detected	Not Detected	AGAAAGTGTCATCACACA	MIMAT0022704					0
mmu-miR-490-3p	-4.56458	-2.19048	4.56458	down	0.1	5.59318	-2.60961	-0.41913	Not Detected	Detected	CAGCATGGAGTCCTCCA	MIMAT0003780	chr6	36371806	36371821	-	0
mmu-miR-490-5p	-2.10554	-1.07419	2.10554	down	15.1141	113.26	4.81654	5.89073	Detected	Detected	ACCCACCTGGAGATC	MIMAT0017261					0
mmu-miR-491-3p	1.63844	0.712327	1.63844	up	0.1	0.1	-2.60961	-3.32194	Not Detected	Not Detected	GTAGAAGGGAATCTTGC	MIMAT0017255	chr4	87768001	87768016	-	0
mmu-miR-491-5p	1.63844	0.712327	1.63844	up	0.1	0.1	-2.60961	-3.32194	Not Detected	Not Detected	CCTCATGGAAGGGTTC	MIMAT0003486	chr4	87767968	87767982	-	0
mmu-miR-493-3p	-46.0101	-5.52388	46.0101	down	0.1	16.8026	-2.60961	2.91427	Not Detected	Detected	CCTGGCACACAGTA	MIMAT0004888	chr12	110818503	110818515	-	0
mmu-miR-493-5p	1.63844	0.712327	1.63844	up	0.1	0.1	-2.60961	-3.32194	Not Detected	Not Detected	GAAAGCCTACCATGTACA	MIMAT0017276	chr12	110818455	110818471	-	0
mmu-miR-494-3p	-2.76449	-1.46701	2.76449	down	1477.71	15292.2	11.3452	12.8123	Detected	Detected	GAGGTTTCCCGTGTA	MIMAT0003182	chr12	110953585	110953598	-	0
mmu-miR-494-5p	1.63844	0.712327	1.63844	up	0.1	0.1	-2.60961	-3.32194	Not Detected	Not Detected	GAGAAGACAACACGGA	MIMAT0017215	chr12	110953551	110953565	-	0
mmu-miR-495-3p	1.63844	0.712327	1.63844	up	0.1	0.1	-2.60961	-3.32194	Not Detected	Not Detected	AAGAAGTGCACCATGTTTGT	MIMAT0003456	chr12	110957008	110957026	-	0
mmu-miR-495-5p	1.63844	0.712327	1.63844	up	0.1	0.1	-2.60961	-3.32194	Not Detected	Not Detected	CGAAAAATAACATGGGC	MIMAT0017249	chr12	110956974	110956989	-	0
mmu-miR-496a-3p	1.63844	0.712327	1.63844	up	0.1	0.1	-2.60961	-3.32194	Not Detected	Not Detected	GAGATTGGCCATGTAATA	MIMAT0003738	chr12	110977379	110977396	-	0
mmu-miR-496a-5p	1.63844	0.712327	1.63844	up	0.1	0.1	-2.60961	-3.32194	Not Detected	Not Detected	TGAACACACCATGGGC	MIMAT0017244	chr12	110977347	110977362	-	0
mmu-miR-496b	1.63844	0.712327	1.63844	up	0.1	0.1	-2.60961	-3.32194	Not Detected	Not Detected	ATGAAAGGAATTGGCCA	MIMAT0025158					0
mmu-miR-497a-3p	1.63844	0.712327	1.63844	up	0.1	0.1	-2.60961	-3.32194	Not Detected	Not Detected	CTAACACCACAGTGTGG	MIMAT0017247	chr11	70048276	70048292	-	0
mmu-miR-497a-5p	-7.9666	-2.99396	7.9666	down	35.8413	943.407	6.12233	9.11629	Detected	Detected	TACAAACCACAGTGTGCTGC	MIMAT0003453	chr11	70048234	70048253	-	0
mmu-miR-497b	1.63844	0.712327	1.63844	up	0.1	0.1	-2.60961	-3.32194	Not Detected	Not Detected	CCACGTCCAAACCA	MIMAT0031404					0
mmu-miR-499-3p	1.63844	0.712327	1.63844	up	0.1	0.1	-2.60961	-3.32194	Not Detected	Not Detected	AGCACAGACTTGCTGT	MIMAT0017254	chr2	155448673	155448687	-	0
mmu-miR-499-5p	-349.09	-8.44745	349.09	down	0.1	109.003	-2.60961	5.83784	Not Detected	Detected	AAACATCACTGCAAGTCTTAA	MIMAT0003482	chr2	155448630	155448649	-	0
mmu-miR-500-3p	1.85262	0.889569	1.85262	up	484.828	782.927	9.62441	8.73484	Detected	Detected	TGAACCCTTGCCCAGG	MIMAT0003507	chrX	6814888	6814874	+	0
mmu-miR-500-5p	-3.57259	-1.83697	3.57259	down	0.1	3.42629	-2.60961	-0.77264	Not Detected	Detected	ACTAAGCACCCAGATAGC	MIMAT0017258	chrX	6814853	6814837	+	0
mmu-miR-501-3p	-3.52937	-1.81941	3.52937	down	0.1	3.34388	-2.60961	-0.790203	Not Detected	Detected	CAAATCCTTGCCCGG	MIMAT0003509					0
mmu-miR-501-5p	1.63844	0.712327	1.63844	up	0.1	0.1	-2.60961	-3.32194	Not Detected	Not Detected	TTTCACCCAGGGACA	MIMAT0003508					0
mmu-miR-503-3p	1.63844	0.712327	1.63844	up	0.1	0.1	-2.60961	-3.32194	Not Detected	Not Detected	CCAGGCAGTGGAA	MIMAT0004790	chrX	50407228	50407217	+	0
mmu-miR-503-5p	3.43791	1.78153	3.43791	up	69.1305	67.4783	6.9371	5.15557	Detected	Detected	CTGCAGTACTGTTCCC	MIMAT0003188	chrX	50407188	50407174	+	0
mmu-miR-504-3p	-3.14207	-1.65172	3.14207	down	20.5255	212.699	5.26128	6.913	Detected	Detected	GAAACCCTGCCCTG	MIMAT0017277	chrX	56350902	56350890	+	0
mmu-miR-504-5p	1.63844	0.712327	1.63844	up	0.1	0.1	-2.60961	-3.32194	Not Detected	Not Detected	GATAGAGTGCAGACCAG	MIMAT0004889	chrX	56350866	56350851	+	0
mmu-miR-5046	1.20479	0.268779	1.20479	up	14.6646	41.5825	4.7763	4.50752	Detected	Detected	AAGGGGGTCACAGTG	MIMAT0020540					0
mmu-miR-505-3p	1.08772	0.121304	1.08772	up	1.79972	14.992	2.38859	2.26729	Detected	Detected	AGAAAACCAGCAAGTGTTGACG	MIMAT0003513	chrX	57647654	57647634	+	0
mmu-miR-505-5p	-56.2333	-5.81335	56.2333	down	0.1	19.1735	-2.60961	3.20374	Not Detected	Detected	AACATCAATACTTCCTGGC	MIMAT0017259					0
mmu-miR-509-3p	1.63844	0.712327	1.63844	up	0.1	0.1	-2.60961	-3.32194	Not Detected	Not Detected	CCATTACAGAAATGTCAATCA	MIMAT0004891					0
mmu-miR-509-5p	1.63844	0.712327	1.63844	up	0.1	0.1	-2.60961	-3.32194	Not Detected	Not Detected	ATGATTGCCACATTCTGGA	MIMAT0004890					0
mmu-miR-5098	31.5698	4.98047	31.5698	up	14.5209	7.32122	4.75555	-0.224922	Detected	Detected	AACTGGGCTTCACCA	MIMAT0020605					0
mmu-miR-5099	-1.80195	-0.849562	1.80195	down	69.6585	420.632	6.9504	7.79996	Detected	Detected	GGAGCACCACATCG	MIMAT0020606					0
mmu-miR-5100	2.01307	1.0094	2.01307	up	2903.34	5002.84	12.4359	11.4265	Detected	Detected	AGAGGCACCGCTGG	MIMAT0020607					0
mmu-miR-5101	1.63844	0.712327	1.63844	up	0.1	0.1	-2.60961	-3.32194	Not Detected	Not Detected	CTGCATCAGCAAAACA	MIMAT0020608					0
mmu-miR-5103	4.12762	2.04531	4.12762	up	207.176	173.126	8.53311	6.4878	Detected	Detected	CCTCAGGGGATCCC	MIMAT0020610					0
mmu-miR-5104	-78.3885	-6.29257	78.3885	down	0.1	23.7177	-2.60961	3.68296	Not Detected	Detected	TGCTGAGCCACCTCA	MIMAT0020611					0
mmu-miR-5106	200.947	7.65067	200.947	up	120.477	13.6328	7.87421	0.22354	Detected	Detected	TCTGCCAACTGAGCTA	MIMAT0020613					0
mmu-miR-5107-3p	1.63844	0.712327	1.63844	up	0.1	0.1	-2.60961	-3.32194	Not Detected	Not Detected	CTGGGAAGAGAAGCAC	MIMAT0022985					0
mmu-miR-5107-5p	1.3617	0.445414	1.3617	up	228.169	545.948	8.70429	8.25888	Detected	Detected	TGTCCCTGCCTCCT	MIMAT0020615	chr18	60971748	60971760	-	0
mmu-miR-5108	1.63844	0.712327	1.63844	up	0.1	0.1	-2.60961	-3.32194	Not Detected	Not Detected	AAACCATCCAGTGCTC	MIMAT0020616					0
mmu-miR-511-3p	1.63844	0.712327	1.63844	up	0.1	0.1	-2.60961	-3.32194	Not Detected	Not Detected	ATCCTGTCTTTTGCTACA	MIMAT0017281					0
mmu-miR-511-5p	1.63844	0.712327	1.63844	up	0.1	0.1	-2.60961	-3.32194	Not Detected	Not Detected	TGAGTGCAGAGCAAAAGGCA	MIMAT0004940	chr2	14182642	14182660	-	0
mmu-miR-5110	-2.19432	-1.13378	2.19432	down	16.4546	134.276	4.96555	6.09933	Detected	Detected	AATTCCACCACCCTCT	MIMAT0020618					0
mmu-miR-5112	1.13821	0.186766	1.13821	up	558.741	1362.8	9.8837	9.69693	Detected	Detected	GTGCTCTCCCGCT	MIMAT0020620					0
mmu-miR-5113	4.33865	2.11725	4.33865	up	185.378	154.485	8.41196	6.29471	Detected	Detected	ACAGGATCTCTCTCCTC	MIMAT0020621					0
mmu-miR-5114	40.3008	5.33274	40.3008	up	21.4007	9.93737	5.32821	-0.00453198	Detected	Detected	TCTTGCAGCTTCCGT	MIMAT0020622					0
mmu-miR-5116	1.133	0.180147	1.133	up	8.15899	24.2505	3.89266	3.71251	Detected	Detected	TCAGGCGGGGTTCC	MIMAT0020624					0
mmu-miR-5118	-242.063	-7.91924	242.063	down	0.1	74.1454	-2.60961	5.30963	Not Detected	Detected	ACCAGGCTGGCCTA	MIMAT0020626					0
mmu-miR-5119	1.92003	0.941129	1.92003	up	437.821	685.525	9.52286	8.58173	Detected	Detected	CCAGCCCCAGGATG	MIMAT0020627					0
mmu-miR-5120	2.85881	1.51542	2.85881	up	40.8844	52.4363	6.32304	4.80762	Detected	Detected	GCTGGTGGCACCA	MIMAT0020628					0
mmu-miR-5121	-14.0388	-3.81135	14.0388	down	36.6393	1674.99	6.15342	9.96477	Detected	Detected	GGAGATGTCTCATCACA	MIMAT0020629					0
mmu-miR-5122	-1.05292	-0.0744019	1.05292	down	24.6703	96.1363	5.57394	5.64835	Detected	Detected	CACAGCCCCGGG	MIMAT0020630					0
mmu-miR-5123	1.63844	0.712327	1.63844	up	0.1	0.1	-2.60961	-3.32194	Not Detected	Not Detected	CACACCATGGCATATGG	MIMAT0020633					0
mmu-miR-5124a	1.63844	0.712327	1.63844	up	0.1	0.1	-2.60961	-3.32194	Not Detected	Not Detected	ATGCTCTTAGTCACTGGA	MIMAT0020634	chr13	40961173	40961189	-	0
mmu-miR-5124b	1.63844	0.712327	1.63844	up	0.1	0.1	-2.60961	-3.32194	Not Detected	Not Detected	TGCTTCTTAGTCACTGAG	MIMAT0025136					0
mmu-miR-5125	1.63844	0.712327	1.63844	up	0.1	0.1	-2.60961	-3.32194	Not Detected	Not Detected	ACAAGGAAATCCCAGGC	MIMAT0020635					0
mmu-miR-5126	10.7865	3.43116	10.7865	up	30349.5	9564.33	15.7654	12.3343	Detected	Detected	CCCCGCCCCCG	MIMAT0020637					0
mmu-miR-5127	1.63844	0.712327	1.63844	up	0.1	0.1	-2.60961	-3.32194	Not Detected	Not Detected	TGGGAAAAGGGTTGGG	MIMAT0020638					0
mmu-miR-5128	-2.90106	-1.53658	2.90106	down	181.379	1645.25	8.38383	9.92041	Detected	Detected	AGCCATCTCGCCAGC	MIMAT0020639					0
mmu-miR-5129-3p	1.63844	0.712327	1.63844	up	0.1	0.1	-2.60961	-3.32194	Not Detected	Not Detected	GGAAGAGATGCACAGG	MIMAT0022987					0
mmu-miR-5129-5p	1.63844	0.712327	1.63844	up	0.1	0.1	-2.60961	-3.32194	Not Detected	Not Detected	GAAAATACCAATGCCCC	MIMAT0020640	chr2	44878651	44878636	+	0
mmu-miR-5130	1.19681	0.259191	1.19681	up	74.2825	204.422	7.10545	6.84626	Detected	Detected	GCCTGCCTCGCC	MIMAT0020641					0
mmu-miR-5131	4.79437	2.26134	4.79437	up	174.768	125.45	8.28437	6.02302	Detected	Detected	GCTCGGGGCTCC	MIMAT0020642					0
mmu-miR-5132-3p	-2.94851	-1.55998	2.94851	down	13.9069	147.691	4.68788	6.24786	Detected	Detected	CTGCGGGATGGGG	MIMAT0022988					0
mmu-miR-5132-5p	-1.5045	-0.589286	1.5045	down	47.4944	253.079	6.50452	7.09381	Detected	Detected	CCTGAGTCCACCACC	MIMAT0020643	chrX	71268894	71268881	+	0
mmu-miR-5133	12.9076	3.69015	12.9076	up	5.60272	7.21064	3.45425	-0.2359	Detected	Detected	CTGCGCTGCCGC	MIMAT0020644					0
mmu-miR-5134-3p	1.63844	0.712327	1.63844	up	0.1	0.1	-2.60961	-3.32194	Not Detected	Not Detected	CTGCAGAAAGAGGGC	MIMAT0022989					0
mmu-miR-5134-5p	22.4746	4.49022	22.4746	up	9.20836	5.45979	4.05368	-0.436541	Detected	Detected	CACAGCTGCCCTTTC	MIMAT0020645	chr17	24371501	24371488	+	0
mmu-miR-5135	-1.31365	-0.393578	1.31365	down	11.8898	53.2389	4.44805	4.84163	Detected	Detected	AGGACGCCCTTGCC	MIMAT0020646					0
mmu-miR-5136	-1.24725	-0.318746	1.24725	down	4.61199	22.232	3.25343	3.57217	Detected	Detected	CCAGTAGTTCCCTCG	MIMAT0020647					0
mmu-miR-532-3p	-3.39856	-1.76492	3.39856	down	1.99687	33.814	2.4766	4.24153	Detected	Detected	TGCAAGCCTTGGGTG	MIMAT0004781					0
mmu-miR-532-5p	-1.31011	-0.389684	1.31011	down	270.664	1037.49	8.90516	9.29485	Detected	Detected	ACGGTCCTACACTCAAG	MIMAT0002889					0
mmu-miR-539-3p	1.63844	0.712327	1.63844	up	0.1	0.1	-2.60961	-3.32194	Not Detected	Not Detected	AAAAAGAAATTATCCTTGTATG	MIMAT0017208					0
mmu-miR-539-5p	1.63844	0.712327	1.63844	up	0.1	0.1	-2.60961	-3.32194	Not Detected	Not Detected	ACACACCAAGGATAATTTCT	MIMAT0003169	chr12	110966349	110966367	-	0
mmu-miR-540-3p	68.0815	6.08919	68.0815	up	2.93811	0.1	2.76725	-3.32194	Detected	Not Detected	CCAGGATCGACCTCT	MIMAT0003167					0
mmu-miR-540-5p	1.63844	0.712327	1.63844	up	0.1	0.1	-2.60961	-3.32194	Not Detected	Not Detected	ACAGAGTCAGAGGGTGA	MIMAT0004786					0
mmu-miR-541-3p	1.63844	0.712327	1.63844	up	0.1	0.1	-2.60961	-3.32194	Not Detected	Not Detected	AGTATGGATTCTGTGTTCG	MIMAT0017209	chr12	110980680	110980697	-	0
mmu-miR-541-5p	1.63844	0.712327	1.63844	up	0.1	0.1	-2.60961	-3.32194	Not Detected	Not Detected	AGTGTGACCAACATCAGA	MIMAT0003170	chr12	110980640	110980656	-	0
mmu-miR-542-3p	3.27432	1.7112	3.27432	up	29.9174	30.8715	5.82475	4.11355	Detected	Detected	TTTCAGTTATCAATCTGTCACA	MIMAT0003172					0
mmu-miR-542-5p	7.05786	2.81923	7.05786	up	43.9747	22.3444	6.39823	3.579	Detected	Detected	TCGTGACATGATGATCCCC	MIMAT0003171					0
mmu-miR-543-3p	1.63844	0.712327	1.63844	up	0.1	0.1	-2.60961	-3.32194	Not Detected	Not Detected	AAGAAGTGCACCGCGAATG	MIMAT0003168	chr12	110955518	110955535	-	0
mmu-miR-543-5p	1.63844	0.712327	1.63844	up	0.1	0.1	-2.60961	-3.32194	Not Detected	Not Detected	CGAAAAACACGCGG	MIMAT0017207	chr12	110955487	110955499	-	0
mmu-miR-544-3p	1.63844	0.712327	1.63844	up	0.1	0.1	-2.60961	-3.32194	Not Detected	Not Detected	GAGCTTGCTAAAAATGCAGAAT	MIMAT0004941	chr12	110967582	110967602	-	0
mmu-miR-544-5p	1.63844	0.712327	1.63844	up	0.1	0.1	-2.60961	-3.32194	Not Detected	Not Detected	AGACTCTGCTTTTTAACAAG	MIMAT0017282					0
mmu-miR-546	1.66517	0.735666	1.66517	up	20.9516	43.4199	5.29343	4.55777	Detected	Detected	GACTCCGTGCCAC	MIMAT0003166					0
mmu-miR-547-3p	1.63844	0.712327	1.63844	up	0.1	0.1	-2.60961	-3.32194	Not Detected	Not Detected	CTCACTCAAAGATGTACCA	MIMAT0003173	chrX	65241617	65241600	+	0
mmu-miR-547-5p	1.63844	0.712327	1.63844	up	0.1	0.1	-2.60961	-3.32194	Not Detected	Not Detected	TGGGTGGTACATCCTC	MIMAT0017210	chrX	65241580	65241566	+	0
mmu-miR-551b-3p	-4.26698	-2.09322	4.26698	down	0.1	4.88764	-2.60961	-0.516395	Not Detected	Detected	CTGAAACCAAGTATGGGTCG	MIMAT0003890	chr3	29315803	29315821	-	0
mmu-miR-551b-5p	2.69347	1.42947	2.69347	up	38.5379	51.336	6.21309	4.78362	Detected	Detected	AGGTCTCACCCAAGC	MIMAT0017236	chr3	29315771	29315784	-	0
mmu-miR-5615-3p	-3.73832	-1.90239	3.73832	down	0.1	3.75154	-2.60961	-0.707222	Not Detected	Detected	TCCTTGGTTGTTTTCTGA	MIMAT0022356					0
mmu-miR-5615-5p	-6.87334	-2.78101	6.87334	down	0.1	12.6822	-2.60961	0.1714	Not Detected	Detected	TCTGTCTCAGAAAACAAC	MIMAT0022355					0
mmu-miR-5616-3p	1.61394	0.690588	1.61394	up	6.53018	16.9008	3.61383	2.92324	Detected	Detected	CTGTCTCACCTCATCA	MIMAT0022360					0
mmu-miR-5616-5p	1.63844	0.712327	1.63844	up	0.1	0.1	-2.60961	-3.32194	Not Detected	Not Detected	TCAACTTGTGATGAGAGG	MIMAT0022359					0
mmu-miR-5617-3p	1.63844	0.712327	1.63844	up	0.1	0.1	-2.60961	-3.32194	Not Detected	Not Detected	AGTGAGAGCTGAGGCC	MIMAT0022362					0
mmu-miR-5617-5p	1.63844	0.712327	1.63844	up	0.1	0.1	-2.60961	-3.32194	Not Detected	Not Detected	CCAGAAGGCTTGCC	MIMAT0022361					0
mmu-miR-5618-3p	1.63844	0.712327	1.63844	up	0.1	0.1	-2.60961	-3.32194	Not Detected	Not Detected	ACCCTTTACATGGTATAG	MIMAT0022364					0
mmu-miR-5618-5p	1.63844	0.712327	1.63844	up	0.1	0.1	-2.60961	-3.32194	Not Detected	Not Detected	ACTACACGGTGTAAAGG	MIMAT0022363					0
mmu-miR-5619-3p	1.63844	0.712327	1.63844	up	0.1	0.1	-2.60961	-3.32194	Not Detected	Not Detected	GAAATCACCAATGAGCTT	MIMAT0022366					0
mmu-miR-5619-5p	1.63844	0.712327	1.63844	up	0.1	0.1	-2.60961	-3.32194	Not Detected	Not Detected	ACAAAAATGCCATTAGTGA	MIMAT0022365					0
mmu-miR-5620-3p	1.48895	0.574291	1.48895	up	26.8412	65.3639	5.69068	5.11639	Detected	Detected	GTGAGGCAGGGGG	MIMAT0022368					0
mmu-miR-5620-5p	-5.52617	-2.46628	5.52617	down	0.1	8.19796	-2.60961	-0.143332	Not Detected	Detected	CACAGTCAAAGCCCC	MIMAT0022367					0
mmu-miR-5621-3p	1.63844	0.712327	1.63844	up	0.1	0.1	-2.60961	-3.32194	Not Detected	Not Detected	GCATGAGGTCTGGAG	MIMAT0022370					0
mmu-miR-5621-5p	3.36095	1.74887	3.36095	up	12.4713	15.7755	4.51612	2.76725	Detected	Detected	TCAGGGCGGCCC	MIMAT0022369					0
mmu-miR-5622-3p	-2.17771	-1.12281	2.17771	down	377.132	2170.37	9.28797	10.4108	Detected	Detected	GCACCACCACTACCC	MIMAT0022372					0
mmu-miR-5622-5p	1.63844	0.712327	1.63844	up	0.1	0.1	-2.60961	-3.32194	Not Detected	Not Detected	TCTTTAAGCTGGGTGTG	MIMAT0022371					0
mmu-miR-5623-3p	1.63844	0.712327	1.63844	up	0.1	0.1	-2.60961	-3.32194	Not Detected	Not Detected	GGTGACAGCTGAAAGC	MIMAT0022374					0
mmu-miR-5623-5p	1.63844	0.712327	1.63844	up	0.1	0.1	-2.60961	-3.32194	Not Detected	Not Detected	TGCATTCTGACTTGCC	MIMAT0022373					0
mmu-miR-5624-3p	1.63844	0.712327	1.63844	up	0.1	0.1	-2.60961	-3.32194	Not Detected	Not Detected	CCTATTGTAAACTCTGCC	MIMAT0022378					0
mmu-miR-5624-5p	1.63844	0.712327	1.63844	up	0.1	0.1	-2.60961	-3.32194	Not Detected	Not Detected	AAGGCAGAGTTTACAATA	MIMAT0022377					0
mmu-miR-5625-3p	1.63844	0.712327	1.63844	up	0.1	0.1	-2.60961	-3.32194	Not Detected	Not Detected	GGACACGAGAGACCA	MIMAT0022380					0
mmu-miR-5625-5p	159.502	7.31743	159.502	up	8.84937	0.1	3.99549	-3.32194	Detected	Not Detected	TCCTACTCAAGAACTTCC	MIMAT0022379					0
mmu-miR-5626-3p	1.63844	0.712327	1.63844	up	0.1	0.1	-2.60961	-3.32194	Not Detected	Not Detected	GTGTCACATCACTCAAC	MIMAT0022382					0
mmu-miR-5626-5p	1.63844	0.712327	1.63844	up	0.1	0.1	-2.60961	-3.32194	Not Detected	Not Detected	GGAAGCAGTTAATCGATG	MIMAT0022381					0
mmu-miR-5627-3p	-3.59196	-1.84477	3.59196	down	3.02766	46.1298	2.80676	4.65153	Detected	Detected	ACGAGGGGCGCC	MIMAT0022386					0
mmu-miR-5627-5p	-6.05179	-2.59736	6.05179	down	0.1	9.8316	-2.60961	-0.0122509	Not Detected	Detected	CGCAGGGCCCG	MIMAT0022385					0
mmu-miR-568	1.63844	0.712327	1.63844	up	0.1	0.1	-2.60961	-3.32194	Not Detected	Not Detected	GTGTGTATACATTTATACAT	MIMAT0004892					0
mmu-miR-5709-3p	1.63844	0.712327	1.63844	up	0.1	0.1	-2.60961	-3.32194	Not Detected	Not Detected	CAATACACACCCTTAAGA	MIMAT0027104					0
mmu-miR-5709-5p	1.63844	0.712327	1.63844	up	0.1	0.1	-2.60961	-3.32194	Not Detected	Not Detected	CTAAAGTCTTAAGTGTGCG	MIMAT0022504	chr17	67026185	67026168	+	0
mmu-miR-5710	-29.3379	-4.8747	29.3379	down	0.1	14.9774	-2.60961	2.26508	Not Detected	Detected	TGCCTTACACTATGTCCC	MIMAT0022505					0
mmu-miR-574-3p	-1.7244	-0.786095	1.7244	down	23.1517	151.397	5.48573	6.27183	Detected	Detected	TGTGGGTGTGTGCAT	MIMAT0004894					0
mmu-miR-574-5p	1.19126	0.252487	1.19126	up	79.3335	219.574	7.20288	6.9504	Detected	Detected	ACACACTCACACACACAC	MIMAT0004893					0
mmu-miR-582-3p	-1.22518	-0.292988	1.22518	down	33.6821	155.264	6.00591	6.2989	Detected	Detected	GTTCAGTTGTTCAACAGG	MIMAT0005292					0
mmu-miR-582-5p	-7.01591	-2.81063	7.01591	down	0.1	13.2137	-2.60961	0.201017	Not Detected	Detected	GTAACTGGTTGAACAACT	MIMAT0005291					0
mmu-miR-590-3p	1.63844	0.712327	1.63844	up	0.1	0.1	-2.60961	-3.32194	Not Detected	Not Detected	ACTAGCTTATACATAAAATTA	MIMAT0004896					0
mmu-miR-590-5p	1.63844	0.712327	1.63844	up	0.1	0.1	-2.60961	-3.32194	Not Detected	Not Detected	CTGCACTTTTATGAATAAGCTC	MIMAT0004895					0
mmu-miR-592-3p	1.63844	0.712327	1.63844	up	0.1	0.1	-2.60961	-3.32194	Not Detected	Not Detected	ATGTTGCGTCACCAC	MIMAT0017234	chr6	27886733	27886720	+	0
mmu-miR-592-5p	1.63844	0.712327	1.63844	up	0.1	0.1	-2.60961	-3.32194	Not Detected	Not Detected	ACATCATCGCATATTGACAC	MIMAT0003730	chr6	27886694	27886676	+	0
mmu-miR-598-3p	-178.036	-7.47602	178.036	down	0.1	54.2537	-2.60961	4.86641	Not Detected	Detected	TAACGATGACGACGATGACGTA	MIMAT0004942	chr14	64346074	64346094	-	0
mmu-miR-598-5p	1.37437	0.458774	1.37437	up	18.8533	48.0882	5.15664	4.69786	Detected	Detected	GCTCGCACCATCGG	MIMAT0017283	chr14	64346046	64346058	-	0
mmu-miR-599	1.63844	0.712327	1.63844	up	0.1	0.1	-2.60961	-3.32194	Not Detected	Not Detected	GTTTGATAAACTGACACAA	MIMAT0012772					0
mmu-miR-615-3p	-2.48042	-1.31058	2.48042	down	0.1	1.65161	-2.60961	-1.29903	Not Detected	Detected	AAGAGGGAGACCCAGGC	MIMAT0003783					0
mmu-miR-615-5p	1.63844	0.712327	1.63844	up	0.1	0.1	-2.60961	-3.32194	Not Detected	Not Detected	GATCCGAGCACCGGG	MIMAT0004837					0
mmu-miR-6236	1.10992	0.150457	1.10992	up	40.6896	139.628	6.3153	6.16484	Detected	Detected	CCTGACTGCCGGC	MIMAT0024857					0
mmu-miR-6237	1.63844	0.712327	1.63844	up	0.1	0.1	-2.60961	-3.32194	Not Detected	Not Detected	GAATTCCAAGACCCAAT	MIMAT0024858					0
mmu-miR-6238	-3.54388	-1.82533	3.54388	down	64.116	730.068	6.82657	8.65189	Detected	Detected	CATTTCCTCCACTGAC	MIMAT0024859					0
mmu-miR-6239	6.44699	2.68862	6.44699	up	2.96372	11.4349	2.78534	0.0967193	Detected	Detected	CACCGAGTGATCCAA	MIMAT0024860					0
mmu-miR-6240	1.7747	0.827573	1.7747	up	52.5828	105.41	6.62951	5.80194	Detected	Detected	CGCCGTGGGCC	MIMAT0024861					0
mmu-miR-6241	-4.35076	-2.12127	4.35076	down	0.1	5.08145	-2.60961	-0.488344	Not Detected	Detected	GGGAATTCCAGCCG	MIMAT0024862					0
mmu-miR-6244	1.63844	0.712327	1.63844	up	0.1	0.1	-2.60961	-3.32194	Not Detected	Not Detected	ACCCGATAATTCCACG	MIMAT0024864					0
mmu-miR-6335	1.63844	0.712327	1.63844	up	0.1	0.1	-2.60961	-3.32194	Not Detected	Not Detected	CAGAATATCACTGTGTATGC	MIMAT0025077					0
mmu-miR-6336	1.63844	0.712327	1.63844	up	0.1	0.1	-2.60961	-3.32194	Not Detected	Not Detected	GATCTCTTACTAAATCCGA	MIMAT0025079					0
mmu-miR-6337	-3.56422	-1.83358	3.56422	down	0.1	3.41024	-2.60961	-0.776027	Not Detected	Detected	ACCTAGCAACCCAGC	MIMAT0025080					0
mmu-miR-6338	1.63844	0.712327	1.63844	up	0.1	0.1	-2.60961	-3.32194	Not Detected	Not Detected	AGCACAAATGAGAGAAAC	MIMAT0025081					0
mmu-miR-6339	1.63844	0.712327	1.63844	up	0.1	0.1	-2.60961	-3.32194	Not Detected	Not Detected	CTAACACTGAGGACAAAG	MIMAT0025082					0
mmu-miR-6340	1.63844	0.712327	1.63844	up	0.1	0.1	-2.60961	-3.32194	Not Detected	Not Detected	GCCAAAGCGAAGCT	MIMAT0025083					0
mmu-miR-6341	1.63844	0.712327	1.63844	up	0.1	0.1	-2.60961	-3.32194	Not Detected	Not Detected	ATAGTGACAATATCATTGCAC	MIMAT0025084					0
mmu-miR-6342	1.63844	0.712327	1.63844	up	0.1	0.1	-2.60961	-3.32194	Not Detected	Not Detected	CTCAAAGACCAGATTGC	MIMAT0025085					0
mmu-miR-6343	79.7967	6.31826	79.7967	up	3.64618	0.1	2.99632	-3.32194	Detected	Not Detected	GTCAGTCAGCTCCTAC	MIMAT0025086					0
mmu-miR-6344	1.63844	0.712327	1.63844	up	0.1	0.1	-2.60961	-3.32194	Not Detected	Not Detected	AAAAGGGAAACAGTAGGA	MIMAT0025087					0
mmu-miR-6345	-1.86361	-0.898099	1.86361	down	8.07963	51.2094	3.8782	4.7763	Detected	Detected	AGTTCACCCTGAGCAG	MIMAT0025088					0
mmu-miR-6346	1.63844	0.712327	1.63844	up	0.1	0.1	-2.60961	-3.32194	Not Detected	Not Detected	TTGGCATTGCAGACAC	MIMAT0025089					0
mmu-miR-6347	-47.2324	-5.5617	47.2324	down	0.1	17.0179	-2.60961	2.95209	Not Detected	Detected	GCATCTCCAGCCAGC	MIMAT0025090					0
mmu-miR-6348	1.63844	0.712327	1.63844	up	0.1	0.1	-2.60961	-3.32194	Not Detected	Not Detected	ACACACACCTTATAAAGGC	MIMAT0025091					0
mmu-miR-6349	3.29088	1.71847	3.29088	up	101.872	107.38	7.54322	5.82475	Detected	Detected	CGCATGCCCCTCC	MIMAT0025092					0
mmu-miR-6350	21.7778	4.44479	21.7778	up	9.48317	6.13758	4.09266	-0.352129	Detected	Detected	ATATTTATAATGCACCTGCTA	MIMAT0025093					0
mmu-miR-6351	1.42923	0.515235	1.42923	up	34.8477	91.4951	6.08423	5.569	Detected	Detected	CATGTGCTCCCTGAG	MIMAT0025094					0
mmu-miR-6352	1.80963	0.855692	1.80963	up	9.72932	19.7899	4.1246	3.26891	Detected	Detected	GAGCTGGGGTCCTT	MIMAT0025095					0
mmu-miR-6353	1.63844	0.712327	1.63844	up	0.1	0.1	-2.60961	-3.32194	Not Detected	Not Detected	AATAGGATAAATACGTGCTG	MIMAT0025096					0
mmu-miR-6354	1.3157	0.395832	1.3157	up	102.38	265.108	7.55588	7.16005	Detected	Detected	AGAGACCTGATCCCCA	MIMAT0025097					0
mmu-miR-6355	1.63844	0.712327	1.63844	up	0.1	0.1	-2.60961	-3.32194	Not Detected	Not Detected	ATATCACATTGGAGCATTGT	MIMAT0025098					0
mmu-miR-6356	1.63844	0.712327	1.63844	up	0.1	0.1	-2.60961	-3.32194	Not Detected	Not Detected	TCATTGTTAGGACTCTGG	MIMAT0025099					0
mmu-miR-6357	1.63844	0.712327	1.63844	up	0.1	0.1	-2.60961	-3.32194	Not Detected	Not Detected	CCTGAAAGCCCTGAG	MIMAT0025100					0
mmu-miR-6358	1.63844	0.712327	1.63844	up	0.1	0.1	-2.60961	-3.32194	Not Detected	Not Detected	TATAGCTGTATACTGCCACA	MIMAT0025101					0
mmu-miR-6359	8.12476	3.02232	8.12476	up	3.82287	10.4703	3.05548	0.0331514	Detected	Detected	TTCTGACCCTGGGC	MIMAT0025102					0
mmu-miR-6360	-2.91969	-1.54581	2.91969	down	307.94	2617.13	9.06085	10.6067	Detected	Detected	TCCTGCTGCCTGAGC	MIMAT0025103					0
mmu-miR-6361	1.63844	0.712327	1.63844	up	0.1	0.1	-2.60961	-3.32194	Not Detected	Not Detected	GTCACAGGGTGACTG	MIMAT0025104					0
mmu-miR-6362	1.63844	0.712327	1.63844	up	0.1	0.1	-2.60961	-3.32194	Not Detected	Not Detected	CAGAACTAGCCTAGATGC	MIMAT0025106					0
mmu-miR-6363	1.63844	0.712327	1.63844	up	0.1	0.1	-2.60961	-3.32194	Not Detected	Not Detected	TTTGAGGACAGTCCAGT	MIMAT0025107					0
mmu-miR-6364	1.63844	0.712327	1.63844	up	0.1	0.1	-2.60961	-3.32194	Not Detected	Not Detected	TCACAGGAGTGCTGG	MIMAT0025108					0
mmu-miR-6365	1.63844	0.712327	1.63844	up	0.1	0.1	-2.60961	-3.32194	Not Detected	Not Detected	CAACAAATATATTAAAGGCTAA	MIMAT0025109					0
mmu-miR-6366	10.8717	3.44251	10.8717	up	56413.9	15815.9	16.4162	12.9737	Detected	Detected	TGGCTCCCCGGG	MIMAT0025110					0
mmu-miR-6367	231.958	7.85772	231.958	up	12.6514	0.1	4.53578	-3.32194	Detected	Not Detected	TCCTGAACCAGGGTC	MIMAT0025111					0
mmu-miR-6368	6.06842	2.60132	6.06842	up	947.514	496.647	10.6579	8.05656	Detected	Detected	CTCCCCTCCACTGC	MIMAT0025112					0
mmu-miR-6369	-5.66612	-2.50236	5.66612	down	0.1	8.61845	-2.60961	-0.10725	Not Detected	Detected	CTCACCAACACTGAAC	MIMAT0025113					0
mmu-miR-6370	11.2771	3.49532	11.2771	up	339.151	97.4228	9.16588	5.67056	Detected	Detected	CTTCCCCTTTGCTGT	MIMAT0025114					0
mmu-miR-6371	1.63844	0.712327	1.63844	up	0.1	0.1	-2.60961	-3.32194	Not Detected	Not Detected	AGAAGAGCTTCAAGCCA	MIMAT0025115					0
mmu-miR-6372	827.892	9.6933	827.892	up	42.9033	0.1	6.37136	-3.32194	Detected	Not Detected	AGGCTGGAAGTTTCCC	MIMAT0025116					0
mmu-miR-6373	6.42932	2.68467	6.42932	up	22.9862	16.0553	5.47474	2.79008	Detected	Detected	TCACCTCCTAGATATTCCC	MIMAT0025117					0
mmu-miR-6374	400.335	8.64507	400.335	up	21.2906	0.1	5.32313	-3.32194	Detected	Not Detected	AGCACCAACTAGCTTATAA	MIMAT0025118					0
mmu-miR-6375	1.63844	0.712327	1.63844	up	0.1	0.1	-2.60961	-3.32194	Not Detected	Not Detected	TTTGGAATACAGTCAGCC	MIMAT0025119					0
mmu-miR-6376	1.63844	0.712327	1.63844	up	0.1	0.1	-2.60961	-3.32194	Not Detected	Not Detected	TAATCTCCAATTGGCCAC	MIMAT0025120					0
mmu-miR-6377	1.63844	0.712327	1.63844	up	0.1	0.1	-2.60961	-3.32194	Not Detected	Not Detected	GATGCAGACACGAAGA	MIMAT0025122					0
mmu-miR-6378	-6.27611	-2.64987	6.27611	down	96.5664	1722.51	7.44639	10.0963	Detected	Detected	GCGTGTGTCCTCCC	MIMAT0025124					0
mmu-miR-6379	1.63844	0.712327	1.63844	up	0.1	0.1	-2.60961	-3.32194	Not Detected	Not Detected	TCTAGCTGTAAAACTCCAG	MIMAT0025125					0
mmu-miR-6380	1.63844	0.712327	1.63844	up	0.1	0.1	-2.60961	-3.32194	Not Detected	Not Detected	GCTCAGCAGTTAAAAGC	MIMAT0025126					0
mmu-miR-6381	169.113	7.40185	169.113	up	9.39929	0.1	4.07991	-3.32194	Detected	Not Detected	ACTCATGTCACCAGCA	MIMAT0025127					0
mmu-miR-6382	-4.37887	-2.13056	4.37887	down	0.1	5.14732	-2.60961	-0.479053	Not Detected	Detected	CTTGTGTGCTCTCTTTAC	MIMAT0025128					0
mmu-miR-6383	1.63844	0.712327	1.63844	up	0.1	0.1	-2.60961	-3.32194	Not Detected	Not Detected	TGTCCGTGACACAGC	MIMAT0025129					0
mmu-miR-6384	1.63844	0.712327	1.63844	up	0.1	0.1	-2.60961	-3.32194	Not Detected	Not Detected	CAGGGAAACAGTAGGA	MIMAT0025130					0
mmu-miR-6385	1.08536	0.118178	1.08536	up	266.162	793	8.87036	8.75218	Detected	Detected	CTTCCTCTCTGTCATCC	MIMAT0025131					0
mmu-miR-6386	-2.00933	-1.00671	2.00933	down	14.5124	102.25	4.7545	5.76122	Detected	Detected	ACTTGCATCCCACCC	MIMAT0025133					0
mmu-miR-6387	1.63844	0.712327	1.63844	up	0.1	0.1	-2.60961	-3.32194	Not Detected	Not Detected	ATACACAAGGGAAGCCA	MIMAT0025134					0
mmu-miR-6388	-1.61626	-0.692658	1.61626	down	6.2169	33.9258	3.55201	4.24467	Detected	Detected	GGCCTCACTGTGCC	MIMAT0025135					0
mmu-miR-6389	1.63844	0.712327	1.63844	up	0.1	0.1	-2.60961	-3.32194	Not Detected	Not Detected	GCAAAGTTTAACATTGCA	MIMAT0025137					0
mmu-miR-6390	1.63844	0.712327	1.63844	up	0.1	0.1	-2.60961	-3.32194	Not Detected	Not Detected	TGGTTACATCCTGATCAA	MIMAT0025139					0
mmu-miR-6391	2.86859	1.52034	2.86859	up	260.505	292.918	8.85093	7.33058	Detected	Detected	ACATTGTCCTCCCGT	MIMAT0025140					0
mmu-miR-6392-3p	-1.86425	-0.898594	1.86425	down	36.8663	244.682	6.16484	7.06343	Detected	Detected	AGAGGACCCGGCA	MIMAT0025142					0
mmu-miR-6392-5p	1.63844	0.712327	1.63844	up	0.1	0.1	-2.60961	-3.32194	Not Detected	Not Detected	GCTGACAGGACCAGG	MIMAT0025141					0
mmu-miR-6393	1.63844	0.712327	1.63844	up	0.1	0.1	-2.60961	-3.32194	Not Detected	Not Detected	ACTCAGTGTGCTTCGT	MIMAT0025143					0
mmu-miR-6394	-1.99436	-0.995928	1.99436	down	78.0968	510.354	7.16901	8.16494	Detected	Detected	AGACCTGGCCCCAC	MIMAT0025144					0
mmu-miR-6395	1.63844	0.712327	1.63844	up	0.1	0.1	-2.60961	-3.32194	Not Detected	Not Detected	TAAACAGGGCAGAGAGG	MIMAT0025146					0
mmu-miR-6396	519.33	9.02051	519.33	up	27.0689	0.1	5.69857	-3.32194	Detected	Not Detected	TCCAGGACTAGGAGCT	MIMAT0025147					0
mmu-miR-6397	-6.89848	-2.78628	6.89848	down	0.1	12.7751	-2.60961	0.176666	Not Detected	Detected	TCACTCCACTGAAAGTC	MIMAT0025149					0
mmu-miR-6398	1.63844	0.712327	1.63844	up	0.1	0.1	-2.60961	-3.32194	Not Detected	Not Detected	CCTTACCTGAGGTTCA	MIMAT0025150					0
mmu-miR-6399	1.63844	0.712327	1.63844	up	0.1	0.1	-2.60961	-3.32194	Not Detected	Not Detected	CCTCAGAATACCATCATTG	MIMAT0025151					0
mmu-miR-6400	1.63844	0.712327	1.63844	up	0.1	0.1	-2.60961	-3.32194	Not Detected	Not Detected	GCGAGCACCAAGC	MIMAT0025152					0
mmu-miR-6401	1.22722	0.29539	1.22722	up	47.633	143.584	6.51629	6.2209	Detected	Detected	ACCCGACACCACTG	MIMAT0025153					0
mmu-miR-6402	2.42405	1.27742	2.42405	up	49.7816	72.6573	6.5594	5.28198	Detected	Detected	GCGGGTTCCTGGG	MIMAT0025154					0
mmu-miR-6403	1.63844	0.712327	1.63844	up	0.1	0.1	-2.60961	-3.32194	Not Detected	Not Detected	CACTGGGAAACAGCG	MIMAT0025155					0
mmu-miR-6404	100.807	6.65545	100.807	up	68.1617	14.252	6.91103	0.255581	Detected	Detected	CTACCCCTTGTCACTT	MIMAT0025156					0
mmu-miR-6405	2.40596	1.26661	2.40596	up	55.6687	82.2174	6.69151	5.4249	Detected	Detected	CACTGCTTCCCACTG	MIMAT0025157					0
mmu-miR-6406	1.63844	0.712327	1.63844	up	0.1	0.1	-2.60961	-3.32194	Not Detected	Not Detected	CATGAGTCAGCCTGAG	MIMAT0025159					0
mmu-miR-6407	1.60142	0.679351	1.60142	up	46.5245	105.972	6.4878	5.80845	Detected	Detected	ACTTGCCCTGTCAGG	MIMAT0025160					0
mmu-miR-6408	-47.6743	-5.57514	47.6743	down	0.1	17.2653	-2.60961	2.96553	Not Detected	Detected	GACCATCCCATGCAA	MIMAT0025161					0
mmu-miR-6409	1.63844	0.712327	1.63844	up	0.1	0.1	-2.60961	-3.32194	Not Detected	Not Detected	AGGAGCACACATCCTC	MIMAT0025162					0
mmu-miR-6410	1.63844	0.712327	1.63844	up	0.1	0.1	-2.60961	-3.32194	Not Detected	Not Detected	GCACAGAGTAGTCCCT	MIMAT0025163					0
mmu-miR-6411	1.63844	0.712327	1.63844	up	0.1	0.1	-2.60961	-3.32194	Not Detected	Not Detected	CATTATGTACTACACATGCT	MIMAT0025164					0
mmu-miR-6412	2.16011	1.1111	2.16011	up	23.2017	38.0563	5.48764	4.37653	Detected	Detected	TAGTAGCTGAGGATGGTT	MIMAT0025165					0
mmu-miR-6413	-50.0706	-5.64589	50.0706	down	0.1	17.8689	-2.60961	3.03628	Not Detected	Detected	ACTACCTGCTCTTCTGA	MIMAT0025166					0
mmu-miR-6414	1.63844	0.712327	1.63844	up	0.1	0.1	-2.60961	-3.32194	Not Detected	Not Detected	CAAGACTCAGCTCAGA	MIMAT0025168					0
mmu-miR-6415	6.34077	2.66466	6.34077	up	3.40454	14.3114	2.92324	0.258583	Detected	Detected	TGCATGGGGCCCT	MIMAT0025169					0
mmu-miR-6416-3p	1.48447	0.56995	1.48447	up	12.2077	27.438	4.47779	3.90784	Detected	Detected	CTTCCTTTTGCTGCTC	MIMAT0025171					0
mmu-miR-6416-5p	1.63844	0.712327	1.63844	up	0.1	0.1	-2.60961	-3.32194	Not Detected	Not Detected	AGAAGAGCAGATGATACG	MIMAT0025170					0
mmu-miR-6417	1.63844	0.712327	1.63844	up	0.1	0.1	-2.60961	-3.32194	Not Detected	Not Detected	TGTGGCTAGCTGTCG	MIMAT0025172					0
mmu-miR-6418-3p	1.63844	0.712327	1.63844	up	0.1	0.1	-2.60961	-3.32194	Not Detected	Not Detected	CCTGGAGAAAGGAGG	MIMAT0025174					0
mmu-miR-6418-5p	4.15114	2.05351	4.15114	up	506.69	386.462	9.72459	7.67108	Detected	Detected	GCATCTCTTCCCTTCC	MIMAT0025173					0
mmu-miR-6419	1.63844	0.712327	1.63844	up	0.1	0.1	-2.60961	-3.32194	Not Detected	Not Detected	TCCATGTGTCAGATTGC	MIMAT0025175					0
mmu-miR-6420	1.63844	0.712327	1.63844	up	0.1	0.1	-2.60961	-3.32194	Not Detected	Not Detected	GTTTGATTTTATAGGATTAGT	MIMAT0025176					0
mmu-miR-6481	-4.48559	-2.1653	4.48559	down	0.1	5.40127	-2.60961	-0.444315	Not Detected	Detected	CATCTAAGCATTTTCAGTG	MIMAT0027339					0
mmu-miR-6516-3p	-301.016	-8.2337	301.016	down	0.1	95.4433	-2.60961	5.62409	Not Detected	Detected	CTGTTTGCAGTATCATACA	MIMAT0027344					0
mmu-miR-6516-5p	-423.066	-8.72474	423.066	down	0.1	135.081	-2.60961	6.11513	Not Detected	Detected	TGTCCACACCTGTTACT	MIMAT0027343					0
mmu-miR-652-3p	1.25373	0.326228	1.25373	up	328.897	808.775	9.12783	8.80161	Detected	Detected	CACAACCCTAGTGGCG	MIMAT0003711	chrX	139173609	139173623	-	0
mmu-miR-652-5p	-1.13617	-0.184175	1.13617	down	225.66	818.413	8.66675	8.85093	Detected	Detected	GAATGGCACCCCCT	MIMAT0017260	chrX	139173574	139173586	-	0
mmu-miR-653-3p	1.63844	0.712327	1.63844	up	0.1	0.1	-2.60961	-3.32194	Not Detected	Not Detected	ACTGAAACAAACTCCAGT	MIMAT0017284	chr6	3671371	3671355	+	0
mmu-miR-653-5p	1.63844	0.712327	1.63844	up	0.1	0.1	-2.60961	-3.32194	Not Detected	Not Detected	CAGTAGAGATTGTTTCAACA	MIMAT0004943	chr6	3671331	3671313	+	0
mmu-miR-6537-3p	-1.47807	-0.563714	1.47807	down	8.18405	40.5263	3.90142	4.46514	Detected	Detected	AGCTGAGTTCTTCCACC	MIMAT0025582					0
mmu-miR-6537-5p	1.63844	0.712327	1.63844	up	0.1	0.1	-2.60961	-3.32194	Not Detected	Not Detected	GTCACCAGTGGGAGA	MIMAT0025581					0
mmu-miR-6538	6.33328	2.66295	6.33328	up	3038.06	1658.55	12.6006	9.93761	Detected	Detected	CGCCGCCCCG	MIMAT0025583					0
mmu-miR-6539	-2.95271	-1.56204	2.95271	down	0.1	2.34044	-2.60961	-1.04757	Not Detected	Detected	AGCCCTCAGAGTTCATC	MIMAT0025584					0
mmu-miR-654-3p	1.63844	0.712327	1.63844	up	0.1	0.1	-2.60961	-3.32194	Not Detected	Not Detected	AAGGTGATGGTCAGCAG	MIMAT0004898					0
mmu-miR-654-5p	1.63844	0.712327	1.63844	up	0.1	0.1	-2.60961	-3.32194	Not Detected	Not Detected	ACACATGTTCTGCAGCTT	MIMAT0004897					0
mmu-miR-6540-3p	1.63844	0.712327	1.63844	up	0.1	0.1	-2.60961	-3.32194	Not Detected	Not Detected	TGGAGGTAAGCAAGCT	MIMAT0025586					0
mmu-miR-6540-5p	-59.5617	-5.89631	59.5617	down	0.1	19.9198	-2.60961	3.2867	Not Detected	Detected	CACTGAAGTCTGCCTG	MIMAT0025585					0
mmu-miR-6541	1.63844	0.712327	1.63844	up	0.1	0.1	-2.60961	-3.32194	Not Detected	Not Detected	CTTGAGAAGTCCTTGC	MIMAT0025588					0
mmu-miR-6546-3p	-4.57848	-2.19487	4.57848	down	0.1	5.6273	-2.60961	-0.414743	Not Detected	Detected	TCTGGCGCTTGGGC	MIMAT0029793					0
mmu-miR-6546-5p	1.63844	0.712327	1.63844	up	0.1	0.1	-2.60961	-3.32194	Not Detected	Not Detected	ACAAGCACAAGCTCAGA	MIMAT0029792					0
mmu-miR-664-3p	2.66615	1.41476	2.66615	up	14.2197	20.2343	4.72656	3.3118	Detected	Detected	TAGGCTGGGGAGTAA	MIMAT0012774	chr1	187066899	187066912	-	0
mmu-miR-664-5p	-2.12586	-1.08804	2.12586	down	3.18099	27.9064	2.85065	3.93869	Detected	Detected	CCAGTCATTTTCCCCA	MIMAT0017353	chr1	187066860	187066874	-	0
mmu-miR-665-3p	-2.58541	-1.37039	2.58541	down	0.1	1.79438	-2.60961	-1.23922	Not Detected	Detected	AGGGACCTCAGCCTC	MIMAT0003733	chr12	110824584	110824597	-	0
mmu-miR-665-5p	1.63844	0.712327	1.63844	up	0.1	0.1	-2.60961	-3.32194	Not Detected	Not Detected	AATCCTGGATAGAGGCA	MIMAT0017238	chr12	110824551	110824566	-	0
mmu-miR-666-3p	153.987	7.26667	153.987	up	8.45451	0.1	3.94473	-3.32194	Detected	Not Detected	AGCAGGCGATCACGCT	MIMAT0004823					0
mmu-miR-666-5p	20.3837	4.34934	20.3837	up	13.0686	14.0173	4.59295	0.243606	Detected	Detected	GGCTCTCACAGCTG	MIMAT0003737					0
mmu-miR-667-3p	6.37323	2.67203	6.37323	up	1.84319	6.92173	2.40663	-0.265398	Detected	Detected	CTTGGGCTGGGTG	MIMAT0003734	chr12	110958282	110958293	-	0
mmu-miR-667-5p	46.3122	5.53332	46.3122	up	18.7721	5.83112	5.14424	-0.389078	Detected	Detected	CGTGCTCACTGCTC	MIMAT0017239	chr12	110958242	110958254	-	0
mmu-miR-668-3p	16.003	4.00027	16.003	up	9.6479	11.5762	4.10585	0.10558	Detected	Detected	GGTAGTGGGCCGA	MIMAT0003732	chr12	110972996	110973007	-	0
mmu-miR-668-5p	1.63844	0.712327	1.63844	up	0.1	0.1	-2.60961	-3.32194	Not Detected	Not Detected	CATGCTCACCCGAG	MIMAT0017237	chr12	110972954	110972966	-	0
mmu-miR-669a-3-3p	-302.766	-8.24206	302.766	down	0.1	95.8818	-2.60961	5.63245	Not Detected	Detected	ATACATGTGTGTGTATGTTATG	MIMAT0017251					0
mmu-miR-669a-5p	-241.688	-7.917	241.688	down	0.1	74.1138	-2.60961	5.30739	Not Detected	Detected	AGACATGAACATGCACAC	MIMAT0003477	chr2	10410763	10410780	-	0
mmu-miR-669b-3p	-100.522	-6.65136	100.522	down	0.1	29.6769	-2.60961	4.04175	Not Detected	Detected	ATATGTTTGTGTGTATGTATATG	MIMAT0017250	chr2	10389479	10389500	-	0
mmu-miR-669b-5p	-1218.83	-10.2513	1218.83	down	0.1	374.569	-2.60961	7.64167	Not Detected	Detected	ACATGCACATGCACACA	MIMAT0003476	chr2	10389446	10389462	-	0
mmu-miR-669c-3p	-5.49708	-2.45867	5.49708	down	26.8298	507.229	5.68227	8.14093	Detected	Detected	TTTACTTGTGTGTGTGTG	MIMAT0017253	chr2	10430991	10431007	-	0
mmu-miR-669d-3p	-106.463	-6.73421	106.463	down	0.1	31.2734	-2.60961	4.1246	Not Detected	Detected	GTATATGGGTGTGTATGTATA	MIMAT0017324	chr2	10390050	10390070	-	0
mmu-miR-669e-3p	-52.8631	-5.72419	52.8631	down	0.1	18.549	-2.60961	3.11458	Not Detected	Detected	GTGTAAGTGTGTGTATATTC	MIMAT0017330	chr2	10389203	10389221	-	0
mmu-miR-669e-5p	-129.328	-7.01489	129.328	down	0.1	38.4434	-2.60961	4.40528	Not Detected	Detected	ATGAACATGCACACACA	MIMAT0005853	chr2	10389170	10389185	-	0
mmu-miR-669f-3p	-52.5862	-5.71661	52.5862	down	12.775	1938.33	4.55777	10.2744	Detected	Detected	ATACGTGTGTGTGTATGT	MIMAT0005839	chr2	10388918	10388934	-	0
mmu-miR-669f-5p	-49.8116	-5.63841	49.8116	down	0.1	17.7473	-2.60961	3.0288	Not Detected	Detected	ACACATGCACATGCAC	MIMAT0017327					0
mmu-miR-669g	1.63844	0.712327	1.63844	up	0.1	0.1	-2.60961	-3.32194	Not Detected	Not Detected	ATCATGTCAACACATACAATG	MIMAT0005832					0
mmu-miR-669h-3p	-692.744	-9.43618	692.744	down	0.1	200.926	-2.60961	6.82657	Not Detected	Detected	TGTGCATGTGTGTATATGC	MIMAT0005842					0
mmu-miR-669h-5p	-737.49	-9.52648	737.49	down	0.1	213.18	-2.60961	6.91687	Not Detected	Detected	GCACTCAACTATACACCC	MIMAT0005841					0
mmu-miR-669i	-43.2771	-5.43553	43.2771	down	0.1	16.1818	-2.60961	2.82592	Not Detected	Detected	GTATGCATGTGTGTATATGC	MIMAT0005840					0
mmu-miR-669j	1.63844	0.712327	1.63844	up	0.1	0.1	-2.60961	-3.32194	Not Detected	Not Detected	TGTTTGCATGTGAGTATATG	MIMAT0005838					0
mmu-miR-669k-3p	1.63844	0.712327	1.63844	up	0.1	0.1	-2.60961	-3.32194	Not Detected	Not Detected	TTGCATGCGTGTATATGC	MIMAT0005831	chr2	10396995	10397011	-	0
mmu-miR-669k-5p	-7.27721	-2.86339	7.27721	down	0.1	14.2163	-2.60961	0.253773	Not Detected	Detected	GCACACAACTATACACAC	MIMAT0017323	chr2	10396953	10396969	-	0
mmu-miR-669l-3p	-62.7872	-5.9724	62.7872	down	0.1	21.0008	-2.60961	3.36279	Not Detected	Detected	ATATATGGGTGTGTATGTATAT	MIMAT0017345	chr2	10390655	10390675	-	0
mmu-miR-669l-5p	-916.929	-9.84067	916.929	down	0.1	277.139	-2.60961	7.23105	Not Detected	Detected	ACATATACATGCACACAC	MIMAT0009418	chr2	10390015	10390032	-	0
mmu-miR-669m-3p	-111.872	-6.80571	111.872	down	0.1	33.0811	-2.60961	4.1961	Not Detected	Detected	ATATGTTTGTGTGGATGTATAT	MIMAT0009419	chr2	10434474	10434495	-	0
mmu-miR-669n	-158.5	-7.30834	158.5	down	3.01201	1744.55	2.80049	10.1088	Detected	Detected	ACACACATCCACACACAA	MIMAT0009427	chr2	10430951	10430967	-	0
mmu-miR-669o-5p	-6.88694	-2.78386	6.88694	down	0.1	12.7324	-2.60961	0.174252	Not Detected	Detected	ACATAAACATGCACACAC	MIMAT0009421	chr2	10435951	10435967	-	0
mmu-miR-669p-3p	-6.28196	-2.65122	6.28196	down	73.2211	1412.68	7.07338	9.72459	Detected	Detected	ATACGTGTGTGTGTGTATG	MIMAT0014890	chr2	10410799	10410817	-	0
mmu-miR-670-3p	1.63844	0.712327	1.63844	up	0.1	0.1	-2.60961	-3.32194	Not Detected	Not Detected	ACACTCCTGAATGGATATG	MIMAT0017242	chr2	94101540	94101523	+	0
mmu-miR-670-5p	-2.8517	-1.51182	2.8517	down	0.1	2.18306	-2.60961	-1.09779	Not Detected	Detected	TTCACCACATACACTCAG	MIMAT0003736	chr2	94101498	94101482	+	0
mmu-miR-671-3p	4.89764	2.29209	4.89764	up	1.64317	10.3544	2.31721	0.0251255	Detected	Detected	GGTGGAGCCCTGA	MIMAT0004821					0
mmu-miR-671-5p	-1.06285	-0.0879326	1.06285	down	225.978	793.387	8.6687	8.75663	Detected	Detected	CTCCAGCCCCTCC	MIMAT0003731					0
mmu-miR-6715-3p	1.63844	0.712327	1.63844	up	0.1	0.1	-2.60961	-3.32194	Not Detected	Not Detected	CCACAGGCACGCC	MIMAT0029877					0
mmu-miR-6715-5p	1.63844	0.712327	1.63844	up	0.1	0.1	-2.60961	-3.32194	Not Detected	Not Detected	ATGCTCAAACCTGTGG	MIMAT0029876					0
mmu-miR-672-3p	1.63844	0.712327	1.63844	up	0.1	0.1	-2.60961	-3.32194	Not Detected	Not Detected	TCGAAGATAGTGACTGTG	MIMAT0017241	chrX	101311596	101311580	+	0
mmu-miR-672-5p	-8.44307	-3.07777	8.44307	down	17.4337	506.932	5.04698	8.12475	Detected	Detected	TCACACACAGTACACCA	MIMAT0003735	chrX	101311560	101311545	+	0
mmu-miR-673-3p	1.63844	0.712327	1.63844	up	0.1	0.1	-2.60961	-3.32194	Not Detected	Not Detected	GGTGCACAGAACTCAGC	MIMAT0004824					0
mmu-miR-673-5p	1.63844	0.712327	1.63844	up	0.1	0.1	-2.60961	-3.32194	Not Detected	Not Detected	CTCCAAGGACCAGAG	MIMAT0003739					0
mmu-miR-674-3p	-2.09619	-1.06777	2.09619	down	120.08	863.658	7.86031	8.92808	Detected	Detected	TTGTTCTGAGATGGGAGCT	MIMAT0003741	chr2	117010926	117010943	-	0
mmu-miR-674-5p	1.40691	0.492527	1.40691	up	14.3931	33.8562	4.73566	4.24313	Detected	Detected	TACACCACTCCCAT	MIMAT0003740	chr2	117010896	117010908	-	0
mmu-miR-675-3p	1.63844	0.712327	1.63844	up	0.1	0.1	-2.60961	-3.32194	Not Detected	Not Detected	ACTGAGCGGTTAGGGCA	MIMAT0003726					0
mmu-miR-675-5p	-1.83894	-0.878872	1.83894	down	2.46007	21.861	2.63301	3.51188	Detected	Detected	ACTGTGGGCCCTT	MIMAT0003725					0
mmu-miR-676-3p	-8.13829	-3.02473	8.13829	down	9.95022	268.519	4.16351	7.18824	Detected	Detected	AGCTCAACAACCTCAGGA	MIMAT0003782	chrX	97576494	97576510	-	0
mmu-miR-676-5p	-3.86174	-1.94925	3.86174	down	0.1	4.00334	-2.60961	-0.660362	Not Detected	Detected	GCAAGTCCTAAGGTTGT	MIMAT0003781	chrX	97576459	97576474	-	0
mmu-miR-6769b-3p	2.90507	1.53857	2.90507	up	14.038	18.8802	4.69962	3.16105	Detected	Detected	CTGGGTGGGACAGG	MIMAT0028041					0
mmu-miR-6769b-5p	1.71285	0.776401	1.71285	up	7183.49	28502.7	14.3432	13.5668	Detected	Detected	GCTCTTCCCCACCC	MIMAT0028040					0
mmu-miR-677-3p	-8.78836	-3.13559	8.78836	down	13.3082	411.007	4.61441	7.75	Detected	Detected	CCTTCTCAGGAACGG	MIMAT0017246	chr10	127522403	127522416	-	0
mmu-miR-677-5p	-67.6427	-6.07986	67.6427	down	0.1	21.5223	-2.60961	3.47025	Not Detected	Detected	TCAGAAGCTAATCATCACTGA	MIMAT0003451	chr10	127522349	127522368	-	0
mmu-miR-678	1.15342	0.20592	1.15342	up	26.6291	85.4795	5.67056	5.46464	Detected	Detected	CCTCCAGTCCTTG	MIMAT0003452					0
mmu-miR-679-3p	1.63844	0.712327	1.63844	up	0.1	0.1	-2.60961	-3.32194	Not Detected	Not Detected	CTACTGTGAGGAGGAC	MIMAT0017248					0
mmu-miR-679-5p	-2.59737	-1.37705	2.59737	down	0.1	1.81102	-2.60961	-1.23256	Not Detected	Detected	ACCAAGAGTCACCTCAC	MIMAT0003455	chr12	110953803	110953818	-	0
mmu-miR-680	2.57553	1.36487	2.57553	up	313.086	402.132	9.07671	7.71184	Detected	Detected	CCCCCATGTCAGC	MIMAT0003457					0
mmu-miR-681	-1.14271	-0.192456	1.14271	down	68.277	255.284	6.913	7.10545	Detected	Detected	AGCTGCCTGCCAG	MIMAT0003458					0
mmu-miR-682	-7.18233	-2.84445	7.18233	down	1.48846	63.9088	2.23507	5.07952	Detected	Detected	CAGACTTCACTGTGACTG	MIMAT0003459					0
mmu-miR-683	1.63844	0.712327	1.63844	up	0.1	0.1	-2.60961	-3.32194	Not Detected	Not Detected	GAGGACACAGCTTACAGC	MIMAT0003461					0
mmu-miR-684	1.63844	0.712327	1.63844	up	0.1	0.1	-2.60961	-3.32194	Not Detected	Not Detected	TTGACTTGAAGGGAAAACT	MIMAT0003462					0
mmu-miR-686	-7.35005	-2.87775	7.35005	down	0.1	14.5023	-2.60961	0.268141	Not Detected	Detected	TCTTCACCGTCTGGG	MIMAT0003464					0
mmu-miR-687	-5.37387	-2.42596	5.37387	down	0.1	7.75232	-2.60961	-0.18365	Not Detected	Detected	TCATTGCTGCATTCCAG	MIMAT0003466					0
mmu-miR-688	-3.35728	-1.74729	3.35728	down	0.1	3.02574	-2.60961	-0.86232	Not Detected	Detected	GAATAAGTAGTCGCCTGCG	MIMAT0003467					0
mmu-miR-6896-3p	1.63844	0.712327	1.63844	up	0.1	0.1	-2.60961	-3.32194	Not Detected	Not Detected	GTTTGTAGGTGAGAGAGA	MIMAT0027693					0
mmu-miR-6896-5p	1.63844	0.712327	1.63844	up	0.1	0.1	-2.60961	-3.32194	Not Detected	Not Detected	ACGGGTTCTCGTCG	MIMAT0027692					0
mmu-miR-6897-3p	1.81734	0.86183	1.81734	up	21.806	41.982	5.37795	4.51612	Detected	Detected	CTGGGGGAAGAACAC	MIMAT0027695					0
mmu-miR-6897-5p	1.63844	0.712327	1.63844	up	0.1	0.1	-2.60961	-3.32194	Not Detected	Not Detected	AACAGCGTGTGACACT	MIMAT0027694					0
mmu-miR-6898-3p	1.63844	0.712327	1.63844	up	0.1	0.1	-2.60961	-3.32194	Not Detected	Not Detected	AGAGAAGGTACAAAGAGAC	MIMAT0027697					0
mmu-miR-6898-5p	2.47116	1.30519	2.47116	up	505.48	617.306	9.69693	8.39174	Detected	Detected	GCTCCCTGCATCTCC	MIMAT0027696					0
mmu-miR-6899-3p	1.63844	0.712327	1.63844	up	0.1	0.1	-2.60961	-3.32194	Not Detected	Not Detected	CTGCAGAAGACACAGA	MIMAT0027699					0
mmu-miR-6899-5p	1.23686	0.306688	1.23686	up	8.42607	23.1137	3.93869	3.632	Detected	Detected	TCATGCCCGCTGC	MIMAT0027698					0
mmu-miR-690	-10.3128	-3.36636	10.3128	down	44.0968	1504.37	6.41387	9.78023	Detected	Detected	TTTGGTTGTGAGCCTA	MIMAT0003469					0
mmu-miR-6900-3p	1.63844	0.712327	1.63844	up	0.1	0.1	-2.60961	-3.32194	Not Detected	Not Detected	CTACAAGAGAGCCCATC	MIMAT0027701					0
mmu-miR-6900-5p	1.63844	0.712327	1.63844	up	0.1	0.1	-2.60961	-3.32194	Not Detected	Not Detected	GACGGCTCTAGGCT	MIMAT0027700					0
mmu-miR-6901-3p	1.63844	0.712327	1.63844	up	0.1	0.1	-2.60961	-3.32194	Not Detected	Not Detected	CTGCAAGAACACAGAAG	MIMAT0027703					0
mmu-miR-6901-5p	-43.3689	-5.43859	43.3689	down	0.1	16.245	-2.60961	2.82898	Not Detected	Detected	AGGTCCTCTGCATTCC	MIMAT0027702					0
mmu-miR-6902-3p	-6.15507	-2.62178	6.15507	down	0.1	10.17	-2.60961	0.0121634	Not Detected	Detected	CTGAACCCACACATCA	MIMAT0027705					0
mmu-miR-6902-5p	1.63844	0.712327	1.63844	up	0.1	0.1	-2.60961	-3.32194	Not Detected	Not Detected	CTTCATGTGACAATGTGA	MIMAT0027704					0
mmu-miR-6903-3p	1.63844	0.712327	1.63844	up	0.1	0.1	-2.60961	-3.32194	Not Detected	Not Detected	CTGGGAAAAACAGACAC	MIMAT0027707					0
mmu-miR-6903-5p	1.63844	0.712327	1.63844	up	0.1	0.1	-2.60961	-3.32194	Not Detected	Not Detected	TGGTAAGTACTGCTTTTCC	MIMAT0027706					0
mmu-miR-6904-3p	2.12883	1.09006	2.12883	up	7.86897	15.6641	3.84188	2.75182	Detected	Detected	CTGGGGTAAGAGATCAG	MIMAT0027709					0
mmu-miR-6904-5p	-1.41103	-0.496749	1.41103	down	7.74449	36.3824	3.82932	4.32607	Detected	Detected	CCACTCAACTCTAACCC	MIMAT0027708					0
mmu-miR-6905-3p	1.63844	0.712327	1.63844	up	0.1	0.1	-2.60961	-3.32194	Not Detected	Not Detected	ATCGGGCAGATAAGGT	MIMAT0027711					0
mmu-miR-6905-5p	-273.49	-8.09535	273.49	down	0.1	86.7277	-2.60961	5.48573	Not Detected	Detected	TCATTCAACCCAACCTG	MIMAT0027710					0
mmu-miR-6906-3p	1.63844	0.712327	1.63844	up	0.1	0.1	-2.60961	-3.32194	Not Detected	Not Detected	CTGGAGAGGAGACCG	MIMAT0027713					0
mmu-miR-6906-5p	4.33345	2.11552	4.33345	up	125.128	104.869	7.91261	5.7971	Detected	Detected	CTGTCTGTCCGTCTG	MIMAT0027712					0
mmu-miR-6907-3p	1.63844	0.712327	1.63844	up	0.1	0.1	-2.60961	-3.32194	Not Detected	Not Detected	AGGACACAAAAGAAACG	MIMAT0027715					0
mmu-miR-6907-5p	-1.01011	-0.014514	1.01011	down	20.9172	73.96	5.29006	5.30457	Detected	Detected	CGAGCCTCCCTGT	MIMAT0027714					0
mmu-miR-6908-3p	1.63844	0.712327	1.63844	up	0.1	0.1	-2.60961	-3.32194	Not Detected	Not Detected	CTGCCAGCACAAGG	MIMAT0027717					0
mmu-miR-6908-5p	1.3236	0.404464	1.3236	up	746.958	1488.01	10.1707	9.76623	Detected	Detected	TGGGGCTCTCCCTG	MIMAT0027716					0
mmu-miR-6909-3p	1.63844	0.712327	1.63844	up	0.1	0.1	-2.60961	-3.32194	Not Detected	Not Detected	CTGTGGGAGGCCG	MIMAT0027719					0
mmu-miR-6909-5p	1.1974	0.259908	1.1974	up	13.228	37.0673	4.60186	4.34195	Detected	Detected	AGTGCCCATTCCAGC	MIMAT0027718					0
mmu-miR-691	-1.95471	-0.966956	1.95471	down	16.8434	118.128	4.98338	5.95034	Detected	Detected	TTTTCTGCCTCTCTT	MIMAT0003470					0
mmu-miR-6910-3p	-5.02329	-2.32863	5.02329	down	0.1	6.77383	-2.60961	-0.280978	Not Detected	Detected	GGACAAAGGGTGGAA	MIMAT0027721					0
mmu-miR-6910-5p	-1.71392	-0.777297	1.71392	down	3.76198	25.8505	3.03339	3.81069	Detected	Detected	TGCCCACTGGTGCC	MIMAT0027720					0
mmu-miR-6911-3p	1.63844	0.712327	1.63844	up	0.1	0.1	-2.60961	-3.32194	Not Detected	Not Detected	CTGTGGACAGAGTGTG	MIMAT0027723					0
mmu-miR-6911-5p	-1.17629	-0.234247	1.17629	down	20.8023	88.5721	5.28047	5.51472	Detected	Detected	ATGCCACAGACCCAC	MIMAT0027722					0
mmu-miR-6912-3p	1.63844	0.712327	1.63844	up	0.1	0.1	-2.60961	-3.32194	Not Detected	Not Detected	CTGCAGGAAGGAGAC	MIMAT0027725					0
mmu-miR-6912-5p	2.62871	1.39436	2.62871	up	125.394	177.649	7.9236	6.52924	Detected	Detected	CTGCCTGAGCACCC	MIMAT0027724					0
mmu-miR-6913-3p	1.63844	0.712327	1.63844	up	0.1	0.1	-2.60961	-3.32194	Not Detected	Not Detected	CTGAGGAGACAAATCAG	MIMAT0027727					0
mmu-miR-6913-5p	-3.54273	-1.82486	3.54273	down	0.1	3.36924	-2.60961	-0.784752	Not Detected	Detected	CCAACACCTGACTGG	MIMAT0027726					0
mmu-miR-6914-3p	1.63844	0.712327	1.63844	up	0.1	0.1	-2.60961	-3.32194	Not Detected	Not Detected	CTGGGAAGAGGTGGA	MIMAT0027729					0
mmu-miR-6914-5p	1.63844	0.712327	1.63844	up	0.1	0.1	-2.60961	-3.32194	Not Detected	Not Detected	TCTGTGGCCACCAC	MIMAT0027728					0
mmu-miR-6915-3p	1.63844	0.712327	1.63844	up	0.1	0.1	-2.60961	-3.32194	Not Detected	Not Detected	CTGGGCACGAGGA	MIMAT0027731					0
mmu-miR-6915-5p	-10.7975	-3.43263	10.7975	down	9.37168	330.947	4.07338	7.506	Detected	Detected	ACGAACCTCCATCTGC	MIMAT0027730					0
mmu-miR-6916-3p	1.63844	0.712327	1.63844	up	0.1	0.1	-2.60961	-3.32194	Not Detected	Not Detected	CTGTAGGAAGAGGGAG	MIMAT0027733					0
mmu-miR-6916-5p	-6.71488	-2.74736	6.71488	down	0.1	12.1041	-2.60961	0.137749	Not Detected	Detected	TGACTCATCTCCATCCT	MIMAT0027732					0
mmu-miR-6917-3p	-5.53268	-2.46798	5.53268	down	0.1	8.21727	-2.60961	-0.141634	Not Detected	Detected	CTGTGGTGGGAAGAG	MIMAT0027735					0
mmu-miR-6917-5p	309.272	8.27273	309.272	up	16.3283	0.1	4.95079	-3.32194	Detected	Not Detected	CGGCACAACTCCC	MIMAT0027734					0
mmu-miR-6918-3p	1.63844	0.712327	1.63844	up	0.1	0.1	-2.60961	-3.32194	Not Detected	Not Detected	CTGTGAGAAGGGCAC	MIMAT0027737					0
mmu-miR-6918-5p	-4.54775	-2.18515	4.54775	down	3.35267	63.9397	2.90371	5.08886	Detected	Detected	AGAACCTAATCCCGTCC	MIMAT0027736					0
mmu-miR-6919-3p	1.63844	0.712327	1.63844	up	0.1	0.1	-2.60961	-3.32194	Not Detected	Not Detected	CTGTGGGCCAGGA	MIMAT0027739					0
mmu-miR-6919-5p	-108.632	-6.76331	108.632	down	0.1	32.023	-2.60961	4.1537	Not Detected	Detected	ACAATTCCACCTCCAGT	MIMAT0027738					0
mmu-miR-692	1.63844	0.712327	1.63844	up	0.1	0.1	-2.60961	-3.32194	Not Detected	Not Detected	GAGTGAGGCGCTCA	MIMAT0003471					0
mmu-miR-6920-3p	1.63844	0.712327	1.63844	up	0.1	0.1	-2.60961	-3.32194	Not Detected	Not Detected	AGGCAATGGAAAAGGG	MIMAT0027741					0
mmu-miR-6920-5p	1.63844	0.712327	1.63844	up	0.1	0.1	-2.60961	-3.32194	Not Detected	Not Detected	ACAAGCAGTCTTTCCATT	MIMAT0027740					0
mmu-miR-6921-3p	1.63844	0.712327	1.63844	up	0.1	0.1	-2.60961	-3.32194	Not Detected	Not Detected	CTGAGAGGCAAGGAG	MIMAT0027743					0
mmu-miR-6921-5p	1.89795	0.924439	1.89795	up	25.6646	48.5543	5.63245	4.70801	Detected	Detected	GCTTCCTACCTCATGC	MIMAT0027742					0
mmu-miR-6922-3p	1.63844	0.712327	1.63844	up	0.1	0.1	-2.60961	-3.32194	Not Detected	Not Detected	CTGTGAGAAGGGTGAG	MIMAT0027745					0
mmu-miR-6922-5p	1.42294	0.508873	1.42294	up	26.1671	66.4821	5.64835	5.13947	Detected	Detected	CCTCTCTACAGTCCCC	MIMAT0027744					0
mmu-miR-6923-3p	2.0506	1.03605	2.0506	up	13.0317	22.1284	4.58806	3.55201	Detected	Detected	CTGGGGAGGAGGAG	MIMAT0027747					0
mmu-miR-6923-5p	-140.159	-7.13092	140.159	down	0.1	42.0563	-2.60961	4.5213	Not Detected	Detected	ACACCCCAATCCTCC	MIMAT0027746					0
mmu-miR-6924-3p	1.44228	0.528349	1.44228	up	12.15	28.0463	4.47308	3.94473	Detected	Detected	CTGAAGGGTGGGGA	MIMAT0027749					0
mmu-miR-6924-5p	1.63844	0.712327	1.63844	up	0.1	0.1	-2.60961	-3.32194	Not Detected	Not Detected	ACTTCGCCAAATCCCC	MIMAT0027748					0
mmu-miR-6925-3p	7.51046	2.9089	7.51046	up	3.30298	9.70163	2.88705	-0.0218505	Detected	Detected	CTGAGGGATAAAAGGGG	MIMAT0027751					0
mmu-miR-6925-5p	-6.00991	-2.58734	6.00991	down	0.1	9.69602	-2.60961	-0.0222677	Not Detected	Detected	AGTCCAAGCCTTCTCTT	MIMAT0027750					0
mmu-miR-6926-3p	1.63844	0.712327	1.63844	up	0.1	0.1	-2.60961	-3.32194	Not Detected	Not Detected	CTATGGAGACAGGGATG	MIMAT0027753					0
mmu-miR-6926-5p	-1.06663	-0.0930648	1.06663	down	24.9029	97.78	5.5812	5.67426	Detected	Detected	TCACCATCCCTCACC	MIMAT0027752					0
mmu-miR-6927-3p	-5.56587	-2.47661	5.56587	down	0.1	8.31618	-2.60961	-0.133004	Not Detected	Detected	CTGCAGGGGAGCC	MIMAT0027755					0
mmu-miR-6927-5p	-5.0168	-2.32677	5.0168	down	0.1	6.75633	-2.60961	-0.282844	Not Detected	Detected	AGCCTGGGCTGGAT	MIMAT0027754					0
mmu-miR-6928-3p	1.63844	0.712327	1.63844	up	0.1	0.1	-2.60961	-3.32194	Not Detected	Not Detected	CTGGAGAGTACAGGAAC	MIMAT0027757					0
mmu-miR-6928-5p	1.63844	0.712327	1.63844	up	0.1	0.1	-2.60961	-3.32194	Not Detected	Not Detected	AGTGCAGTCCATGCAA	MIMAT0027756					0
mmu-miR-6929-3p	1.63844	0.712327	1.63844	up	0.1	0.1	-2.60961	-3.32194	Not Detected	Not Detected	CTGGAAGAAGAAGACAG	MIMAT0027759					0
mmu-miR-6929-5p	12.9986	3.70029	12.9986	up	4.69501	5.49901	3.26891	-0.431378	Detected	Detected	TCACAGATGCTGCTCC	MIMAT0027758					0
mmu-miR-693-3p	1.63844	0.712327	1.63844	up	0.1	0.1	-2.60961	-3.32194	Not Detected	Not Detected	TTACAGCCACATCTGAA	MIMAT0004189					0
mmu-miR-693-5p	1.63844	0.712327	1.63844	up	0.1	0.1	-2.60961	-3.32194	Not Detected	Not Detected	GAAAACTTTCGGATGTGGCTG	MIMAT0003472					0
mmu-miR-6930-3p	1.63844	0.712327	1.63844	up	0.1	0.1	-2.60961	-3.32194	Not Detected	Not Detected	CTGGGAGTATGGAGAG	MIMAT0027761					0
mmu-miR-6930-5p	1.63844	0.712327	1.63844	up	0.1	0.1	-2.60961	-3.32194	Not Detected	Not Detected	CCAAACCTCTCAAGCA	MIMAT0027760					0
mmu-miR-6931-3p	2.08434	1.05959	2.08434	up	10.5219	18.9736	4.22996	3.17037	Detected	Detected	CTGGGGTATGAAGAGG	MIMAT0027763					0
mmu-miR-6931-5p	2.97156	1.57122	2.97156	up	3142.03	3849.85	12.6639	11.0927	Detected	Detected	AGTCCCCCACTCCC	MIMAT0027762					0
mmu-miR-6932-5p	1.63844	0.712327	1.63844	up	0.1	0.1	-2.60961	-3.32194	Not Detected	Not Detected	GCCAAGTCTACTTCACC	MIMAT0027764					0
mmu-miR-6933-3p	1.63844	0.712327	1.63844	up	0.1	0.1	-2.60961	-3.32194	Not Detected	Not Detected	TGACGGCAGAGGAAA	MIMAT0027767					0
mmu-miR-6933-5p	1.63844	0.712327	1.63844	up	0.1	0.1	-2.60961	-3.32194	Not Detected	Not Detected	ACAGGTATCCTGACTGC	MIMAT0027766					0
mmu-miR-6934-3p	1.89736	0.923995	1.89736	up	21.9527	40.5963	5.39707	4.47308	Detected	Detected	CTGGTGGGGCAGG	MIMAT0027769					0
mmu-miR-6934-5p	-4.31359	-2.10889	4.31359	down	30.3814	476.931	5.85644	7.96533	Detected	Detected	CCACCCTTGCTGTC	MIMAT0027768					0
mmu-miR-6935-3p	1.63844	0.712327	1.63844	up	0.1	0.1	-2.60961	-3.32194	Not Detected	Not Detected	CTGTGGAAAGACAAAGA	MIMAT0027771					0
mmu-miR-6935-5p	-5.51331	-2.46292	5.51331	down	0.1	8.15984	-2.60961	-0.146694	Not Detected	Detected	CAGGGGCCCTGAG	MIMAT0027770					0
mmu-miR-6936-3p	1.63844	0.712327	1.63844	up	0.1	0.1	-2.60961	-3.32194	Not Detected	Not Detected	GGTGAGCGACCGC	MIMAT0027773					0
mmu-miR-6936-5p	12.7381	3.67108	12.7381	up	4.04428	4.6233	3.11458	-0.556503	Detected	Detected	GCGGGCACGGC	MIMAT0027772					0
mmu-miR-6937-3p	1.3616	0.445298	1.3616	up	26.3365	69.2	5.65875	5.21345	Detected	Detected	CTAGTGCAAGGGGGA	MIMAT0027775					0
mmu-miR-6937-5p	2.47413	1.30692	2.47413	up	1577.4	1778.59	11.4776	10.1707	Detected	Detected	ACACAGACCCAGCCC	MIMAT0027774					0
mmu-miR-6938-3p	1.63844	0.712327	1.63844	up	0.1	0.1	-2.60961	-3.32194	Not Detected	Not Detected	CTAAGGAGACAGCCC	MIMAT0027777					0
mmu-miR-6938-5p	4.2354	2.0825	4.2354	up	157.924	130.26	8.14509	6.06259	Detected	Detected	ACTCTCTCTGGAGCTAGC	MIMAT0027776					0
mmu-miR-6939-3p	1.63844	0.712327	1.63844	up	0.1	0.1	-2.60961	-3.32194	Not Detected	Not Detected	CTGCAGCGGGTCA	MIMAT0027779					0
mmu-miR-6939-5p	-4.44906	-2.1535	4.44906	down	11.8556	183.331	4.44328	6.59678	Detected	Detected	CTTCCACCAACCAGC	MIMAT0027778					0
mmu-miR-694	1.63844	0.712327	1.63844	up	0.1	0.1	-2.60961	-3.32194	Not Detected	Not Detected	CTTCAGGCAACATTTTCA	MIMAT0003474					0
mmu-miR-6940-3p	28.2393	4.81963	28.2393	up	9.1643	3.43442	4.0487	-0.770931	Detected	Detected	CTGCGGGCAAGCA	MIMAT0027781					0
mmu-miR-6940-5p	1.63844	0.712327	1.63844	up	0.1	0.1	-2.60961	-3.32194	Not Detected	Not Detected	CGAAAAACCTTCCAGC	MIMAT0027780					0
mmu-miR-6941-3p	1.63844	0.712327	1.63844	up	0.1	0.1	-2.60961	-3.32194	Not Detected	Not Detected	CTTTGGGAGCAGCC	MIMAT0027783					0
mmu-miR-6941-5p	1.63844	0.712327	1.63844	up	0.1	0.1	-2.60961	-3.32194	Not Detected	Not Detected	AGCTACCCGTCAGTC	MIMAT0027782					0
mmu-miR-6942-3p	1.63844	0.712327	1.63844	up	0.1	0.1	-2.60961	-3.32194	Not Detected	Not Detected	TGAGAGGTGGAGAGAAC	MIMAT0027785					0
mmu-miR-6942-5p	-1.54245	-0.625222	1.54245	down	4.04862	24.8572	3.11718	3.7424	Detected	Detected	GCAAATGTTCCCCTCC	MIMAT0027784					0
mmu-miR-6943-3p	2.32427	1.21678	2.32427	up	18.496	27.4158	5.12329	3.90651	Detected	Detected	CTGGGTAGGGGTATGG	MIMAT0027787					0
mmu-miR-6943-5p	1.63844	0.712327	1.63844	up	0.1	0.1	-2.60961	-3.32194	Not Detected	Not Detected	TAGCTTCCAACCTCACC	MIMAT0027786					0
mmu-miR-6944-3p	118.942	6.89411	118.942	up	6.36332	0.1	3.57217	-3.32194	Detected	Not Detected	CTGAGGGCACAAGG	MIMAT0027789					0
mmu-miR-6944-5p	-1.81635	-0.86104	1.81635	down	207.837	1158.85	8.54468	9.40573	Detected	Detected	CTTGCCACTCCCCC	MIMAT0027788					0
mmu-miR-6945-3p	-3.4491	-1.78622	3.4491	down	0.1	3.19351	-2.60961	-0.823392	Not Detected	Detected	ATGGGAAGGGCAGAG	MIMAT0027791					0
mmu-miR-6945-5p	2.07897	1.05587	2.07897	up	8.20267	16.3568	3.90651	2.85065	Detected	Detected	CCAGGGGCTGCC	MIMAT0027790					0
mmu-miR-6946-3p	1.63844	0.712327	1.63844	up	0.1	0.1	-2.60961	-3.32194	Not Detected	Not Detected	CTGAAAGGGAAGAGAAG	MIMAT0027793					0
mmu-miR-6946-5p	1.36603	0.449991	1.36603	up	18.1146	45.8529	5.08886	4.63887	Detected	Detected	GCATTTCTTTCTCTCCC	MIMAT0027792					0
mmu-miR-6947-3p	1.63844	0.712327	1.63844	up	0.1	0.1	-2.60961	-3.32194	Not Detected	Not Detected	TGATGCCAGGGAAAGA	MIMAT0027795					0
mmu-miR-6947-5p	2.0166	1.01192	2.0166	up	14.7776	25.1157	4.78362	3.7717	Detected	Detected	CACGAGCCTCTCCA	MIMAT0027794					0
mmu-miR-6948-3p	1.63844	0.712327	1.63844	up	0.1	0.1	-2.60961	-3.32194	Not Detected	Not Detected	TGTGGTCAGACAGGAA	MIMAT0027797					0
mmu-miR-6948-5p	1.74539	0.803552	1.74539	up	3.77718	14.8904	3.03862	2.23507	Detected	Detected	GTGTCACAGTCCTGTC	MIMAT0027796					0
mmu-miR-6949-3p	1.63844	0.712327	1.63844	up	0.1	0.1	-2.60961	-3.32194	Not Detected	Not Detected	CTGTGGATAGAAAAAGGG	MIMAT0027799					0
mmu-miR-6949-5p	1.63844	0.712327	1.63844	up	0.1	0.1	-2.60961	-3.32194	Not Detected	Not Detected	TCACCTCTTTCTAGACCC	MIMAT0027798					0
mmu-miR-695	1.63844	0.712327	1.63844	up	0.1	0.1	-2.60961	-3.32194	Not Detected	Not Detected	TTCAGTCACCTATGCCC	MIMAT0003481					0
mmu-miR-6950-3p	1.63844	0.712327	1.63844	up	0.1	0.1	-2.60961	-3.32194	Not Detected	Not Detected	CTGGAGAGGATCAAGAC	MIMAT0027801					0
mmu-miR-6950-5p	22.2829	4.47787	22.2829	up	380.253	52.5583	9.29485	4.81698	Detected	Detected	TCTGACTGTCCTCCAC	MIMAT0027800					0
mmu-miR-6951-3p	1.63844	0.712327	1.63844	up	0.1	0.1	-2.60961	-3.32194	Not Detected	Not Detected	CTGTATTTGTGAAGAAAAAAG	MIMAT0027803					0
mmu-miR-6951-5p	1.63844	0.712327	1.63844	up	0.1	0.1	-2.60961	-3.32194	Not Detected	Not Detected	ACTTTAATCACACAAATACAA	MIMAT0027802					0
mmu-miR-6952-3p	-3.95448	-1.98349	3.95448	down	0.1	4.19793	-2.60961	-0.626125	Not Detected	Detected	CTGTGGGAGGCAGA	MIMAT0027805					0
mmu-miR-6952-5p	1.37693	0.461452	1.37693	up	15.5513	38.4288	4.8541	4.39265	Detected	Detected	TCTCTGTTTCACCGCC	MIMAT0027804					0
mmu-miR-6953-3p	11.6362	3.54055	11.6362	up	7.61721	14.5427	3.81069	0.270145	Detected	Detected	CTGGGGACATAGAGGC	MIMAT0027807					0
mmu-miR-6953-5p	-6.80511	-2.76662	6.80511	down	0.1	12.4316	-2.60961	0.157006	Not Detected	Detected	CACTTGAATCCCTGCC	MIMAT0027806					0
mmu-miR-6954-3p	-6.50744	-2.70209	6.50744	down	0.1	11.3678	-2.60961	0.0924785	Not Detected	Detected	CTAGGGGAAGAGCTGG	MIMAT0027809					0
mmu-miR-6954-5p	3.28492	1.71586	3.28492	up	73.7295	79.2998	7.09381	5.37795	Detected	Detected	ATCTGCCCCCAGAAC	MIMAT0027808					0
mmu-miR-6955-3p	1.63844	0.712327	1.63844	up	0.1	0.1	-2.60961	-3.32194	Not Detected	Not Detected	TGTGGGCAAAGGAGA	MIMAT0027811					0
mmu-miR-6955-5p	-2.09722	-1.06848	2.09722	down	20.1322	155.316	5.23378	6.30227	Detected	Detected	TCACCTCCTGAGTCC	MIMAT0027810					0
mmu-miR-6956-3p	1.63844	0.712327	1.63844	up	0.1	0.1	-2.60961	-3.32194	Not Detected	Not Detected	CTGAGAGGATAGGCCG	MIMAT0027813					0
mmu-miR-6956-5p	1.06407	0.0895939	1.06407	up	12.0214	37.9423	4.45844	4.36884	Detected	Detected	AGGCCAGTCCCACC	MIMAT0027812					0
mmu-miR-6957-3p	1.63844	0.712327	1.63844	up	0.1	0.1	-2.60961	-3.32194	Not Detected	Not Detected	GGAAGAGAAAACAAGAGA	MIMAT0027815					0
mmu-miR-6957-5p	-7.77074	-2.95805	7.77074	down	15.9982	447.724	4.89844	7.85649	Detected	Detected	CTAGATCCTGTCTCTCTT	MIMAT0027814					0
mmu-miR-6958-3p	1.63844	0.712327	1.63844	up	0.1	0.1	-2.60961	-3.32194	Not Detected	Not Detected	CTGTGATGGCAAGAGG	MIMAT0027817					0
mmu-miR-6958-5p	-64.1609	-6.00362	64.1609	down	0.1	21.123	-2.60961	3.39401	Not Detected	Detected	CCACAGCAGCCTCT	MIMAT0027816					0
mmu-miR-6959-3p	1.63844	0.712327	1.63844	up	0.1	0.1	-2.60961	-3.32194	Not Detected	Not Detected	CTGGGAGAGCAGGT	MIMAT0027819					0
mmu-miR-6959-5p	-1.99403	-0.995687	1.99403	down	7.54471	51.7215	3.79911	4.7948	Detected	Detected	CACAGCCCGACAC	MIMAT0027818					0
mmu-miR-696	-225.195	-7.81503	225.195	down	0.1	69.1028	-2.60961	5.20542	Not Detected	Detected	CCCACAGCAAGCAC	MIMAT0003483					0
mmu-miR-6960-3p	1.63844	0.712327	1.63844	up	0.1	0.1	-2.60961	-3.32194	Not Detected	Not Detected	CTGAGGAGAGAGGTGG	MIMAT0027821					0
mmu-miR-6960-5p	1.50303	0.58787	1.50303	up	19.2108	44.3899	5.17593	4.58806	Detected	Detected	CAGCCAAACTCTTCTC	MIMAT0027820					0
mmu-miR-6961-3p	1.63844	0.712327	1.63844	up	0.1	0.1	-2.60961	-3.32194	Not Detected	Not Detected	CTAGAGCCAGGAAGAAA	MIMAT0027823					0
mmu-miR-6961-5p	3.49756	1.80635	3.49756	up	382.369	330.652	9.30962	7.50327	Detected	Detected	GGCCATTTCCTTCCC	MIMAT0027822					0
mmu-miR-6962-3p	1.63844	0.712327	1.63844	up	0.1	0.1	-2.60961	-3.32194	Not Detected	Not Detected	ATAGGACAGGGAAGGG	MIMAT0027825					0
mmu-miR-6962-5p	36.238	5.17943	36.238	up	15.6638	6.46154	4.86441	-0.315025	Detected	Detected	AGATCTCCCACCAGGT	MIMAT0027824					0
mmu-miR-6963-3p	2.60568	1.38166	2.60568	up	6.4669	14.8339	3.59046	2.2088	Detected	Detected	CTGTGGGATGGAGGC	MIMAT0027827					0
mmu-miR-6963-5p	-2.84051	-1.50615	2.84051	down	18.8578	189.805	5.15934	6.66549	Detected	Detected	CCAGGTTCTGCCATC	MIMAT0027826					0
mmu-miR-6964-3p	1.63844	0.712327	1.63844	up	0.1	0.1	-2.60961	-3.32194	Not Detected	Not Detected	CTAGAGTGGAAGACAAGA	MIMAT0027829					0
mmu-miR-6964-5p	1.63844	0.712327	1.63844	up	0.1	0.1	-2.60961	-3.32194	Not Detected	Not Detected	GTTTCCAGTCTCACAC	MIMAT0027828					0
mmu-miR-6965-3p	1.63844	0.712327	1.63844	up	0.1	0.1	-2.60961	-3.32194	Not Detected	Not Detected	CTGGAGCGAGACCG	MIMAT0027831					0
mmu-miR-6965-5p	-1.31526	-0.395347	1.31526	down	119.145	526.534	7.83028	8.22563	Detected	Detected	TCTCCTGCCCAATAGC	MIMAT0027830					0
mmu-miR-6966-3p	1.63844	0.712327	1.63844	up	0.1	0.1	-2.60961	-3.32194	Not Detected	Not Detected	CTGCAGAGGAAGCA	MIMAT0027835					0
mmu-miR-6966-5p	66.5184	6.05568	66.5184	up	31.5297	8.19691	5.91226	-0.143424	Detected	Detected	TGTGCTGTCCACATCC	MIMAT0027834					0
mmu-miR-6967-3p	11.3143	3.50007	11.3143	up	7.14869	13.6263	3.72327	0.223198	Detected	Detected	CTGGGGAGAGATAAAGA	MIMAT0027837					0
mmu-miR-6967-5p	-6.5887	-2.71999	6.5887	down	0.1	11.6535	-2.60961	0.110383	Not Detected	Detected	ACTGGTCTTTATCCCTCC	MIMAT0027836					0
mmu-miR-6968-3p	2.52787	1.33792	2.52787	up	21.5845	29.0483	5.35139	4.01347	Detected	Detected	CTGGAGGGGAGACA	MIMAT0027839					0
mmu-miR-6968-5p	10.2759	3.36119	10.2759	up	6.39153	13.5249	3.579	0.217809	Detected	Detected	CCACAGGGCCCC	MIMAT0027838					0
mmu-miR-6969-3p	1.63844	0.712327	1.63844	up	0.1	0.1	-2.60961	-3.32194	Not Detected	Not Detected	CTGCAGAGATGGGAAC	MIMAT0027841					0
mmu-miR-6969-5p	-5.86111	-2.55117	5.86111	down	315.272	5862.05	9.08914	11.6403	Detected	Detected	TCTTTTGCTCCCTACTC	MIMAT0027840					0
mmu-miR-697	-1.09374	-0.129265	1.09374	down	39.7542	164.865	6.2846	6.41387	Detected	Detected	TCTCCACAGGACCAG	MIMAT0003487					0
mmu-miR-6970-3p	-5.4226	-2.43899	5.4226	down	0.1	7.89356	-2.60961	-0.170626	Not Detected	Detected	AGCACAGGGTGGGT	MIMAT0027843					0
mmu-miR-6970-5p	1.03218	0.0456877	1.03218	up	47.8933	171.17	6.52403	6.47834	Detected	Detected	TCTCTGCTCCCAGCC	MIMAT0027842					0
mmu-miR-6971-3p	1.63844	0.712327	1.63844	up	0.1	0.1	-2.60961	-3.32194	Not Detected	Not Detected	CTGAGAAGAAGCAGAGG	MIMAT0027845					0
mmu-miR-6971-5p	-3.84646	-1.94353	3.84646	down	6.71182	93.4866	3.65011	5.59364	Detected	Detected	AGCCTCTACACCCTCC	MIMAT0027844					0
mmu-miR-6972-3p	1.63844	0.712327	1.63844	up	0.1	0.1	-2.60961	-3.32194	Not Detected	Not Detected	CTATGGAGACAGGTACAG	MIMAT0027847					0
mmu-miR-6972-5p	-2.02671	-1.01914	2.02671	down	7.42751	51.6246	3.7717	4.79084	Detected	Detected	CTGTTCTGCCCTGTG	MIMAT0027846					0
mmu-miR-6973a-3p	-4.56751	-2.19141	4.56751	down	0.1	5.60035	-2.60961	-0.418206	Not Detected	Detected	ATGGGTAGGTAGGGTTAG	MIMAT0027849					0
mmu-miR-6973a-5p	-1.25555	-0.328317	1.25555	down	32.5162	152.872	5.95629	6.2846	Detected	Detected	CAACTCCACCCCTC	MIMAT0027848					0
mmu-miR-6973b-3p	1.63844	0.712327	1.63844	up	0.1	0.1	-2.60961	-3.32194	Not Detected	Not Detected	CTAGGAAGGGTAAGAGAG	MIMAT0027909					0
mmu-miR-6973b-5p	2.86692	1.5195	2.86692	up	332.253	370.83	9.13611	7.61661	Detected	Detected	TCCCTGTCCTCTCCC	MIMAT0027908					0
mmu-miR-6974-3p	1.63844	0.712327	1.63844	up	0.1	0.1	-2.60961	-3.32194	Not Detected	Not Detected	CTGGGACAGAAGAGAG	MIMAT0027851					0
mmu-miR-6974-5p	2.16655	1.1154	2.16655	up	57.3014	93.7349	6.71329	5.59789	Detected	Detected	ACCCCCAATCTCTTGC	MIMAT0027850					0
mmu-miR-6975-3p	1.63844	0.712327	1.63844	up	0.1	0.1	-2.60961	-3.32194	Not Detected	Not Detected	CTAGGAGGAGAAAGGAG	MIMAT0027853					0
mmu-miR-6975-5p	-5.89842	-2.56033	5.89842	down	0.1	9.33961	-2.60961	-0.0492828	Not Detected	Detected	TGCCAAACCCCTTTC	MIMAT0027852					0
mmu-miR-6976-3p	4.58044	2.19549	4.58044	up	24.6304	21.0972	5.569	3.37351	Detected	Detected	CTGGGGAGTTGGGA	MIMAT0027855					0
mmu-miR-6976-5p	1.63844	0.712327	1.63844	up	0.1	0.1	-2.60961	-3.32194	Not Detected	Not Detected	CAATTTTCCTCTCAACTTC	MIMAT0027854					0
mmu-miR-6977-3p	-3.45748	-1.78972	3.45748	down	0.1	3.20904	-2.60961	-0.819893	Not Detected	Detected	GGTCAGGGTCAGGC	MIMAT0027857					0
mmu-miR-6977-5p	2.14441	1.10058	2.14441	up	5.77859	15.236	3.48917	2.38859	Detected	Detected	CCAAGCCGTGCCC	MIMAT0027856					0
mmu-miR-6978-3p	1.63844	0.712327	1.63844	up	0.1	0.1	-2.60961	-3.32194	Not Detected	Not Detected	CTGCAGGGTGAGAGT	MIMAT0027859					0
mmu-miR-6978-5p	3.26724	1.70807	3.26724	up	107.073	117.986	7.64968	5.94161	Detected	Detected	CACCAGCTTCTCTCTC	MIMAT0027858					0
mmu-miR-6979-3p	1.63844	0.712327	1.63844	up	0.1	0.1	-2.60961	-3.32194	Not Detected	Not Detected	CTGGGAGCCAGACA	MIMAT0027861					0
mmu-miR-6979-5p	-3.52468	-1.81749	3.52468	down	0.1	3.335	-2.60961	-0.792121	Not Detected	Detected	CTCAGTCTCTGCGC	MIMAT0027860					0
mmu-miR-698-3p	1.63844	0.712327	1.63844	up	0.1	0.1	-2.60961	-3.32194	Not Detected	Not Detected	AGGGAAGGAAACGAGAATG	MIMAT0003488	chr4	124421097	124421114	-	0
mmu-miR-698-5p	1.4625	0.548437	1.4625	up	14.957	34.5429	4.80762	4.25918	Detected	Detected	AACATCCCTGTCCCAC	MIMAT0022930					0
mmu-miR-6980-3p	2.67579	1.41996	2.67579	up	14.5802	20.8347	4.75991	3.33995	Detected	Detected	CTGGGGTGGAAGGC	MIMAT0027863					0
mmu-miR-6980-5p	-1.73612	-0.795871	1.73612	down	18.4092	115.031	5.11639	5.91226	Detected	Detected	CTAACCTAGCCTCCCC	MIMAT0027862					0
mmu-miR-6981-3p	1.63844	0.712327	1.63844	up	0.1	0.1	-2.60961	-3.32194	Not Detected	Not Detected	CTGAGGAGACAGTAGGC	MIMAT0027865					0
mmu-miR-6981-5p	4.85766	2.28026	4.85766	up	81.4386	58.5779	7.23105	4.95079	Detected	Detected	GCCTTCAGCCTCTTC	MIMAT0027864					0
mmu-miR-6982-3p	1.23139	0.300285	1.23139	up	10.3344	27.6269	4.21554	3.91526	Detected	Detected	CTGGAAGGGGCAGA	MIMAT0027867					0
mmu-miR-6982-5p	-1	0	1	down	14.6937	51.2539	4.77836	4.77836	Detected	Detected	CCAGGCCACCCC	MIMAT0027866					0
mmu-miR-6983-3p	1.63844	0.712327	1.63844	up	0.1	0.1	-2.60961	-3.32194	Not Detected	Not Detected	CTGGAACAACAGACTTT	MIMAT0027869					0
mmu-miR-6983-5p	1.63844	0.712327	1.63844	up	0.1	0.1	-2.60961	-3.32194	Not Detected	Not Detected	CCGAATCAGTATGCCC	MIMAT0027868					0
mmu-miR-6984-3p	1.63844	0.712327	1.63844	up	0.1	0.1	-2.60961	-3.32194	Not Detected	Not Detected	AGAAAGACAGGAAAGAAAG	MIMAT0027871					0
mmu-miR-6984-5p	3.37236	1.75376	3.37236	up	570.754	510.935	9.92041	8.16665	Detected	Detected	GCTCCTCCTTCATTGC	MIMAT0027870					0
mmu-miR-6985-3p	1.63844	0.712327	1.63844	up	0.1	0.1	-2.60961	-3.32194	Not Detected	Not Detected	CTGTGAGGAGGTGGC	MIMAT0027873					0
mmu-miR-6985-5p	587.491	9.19842	587.491	up	382.989	12.148	9.33878	0.140359	Detected	Detected	ACATAGCAGCCACCC	MIMAT0027872					0
mmu-miR-6986-3p	1.63844	0.712327	1.63844	up	0.1	0.1	-2.60961	-3.32194	Not Detected	Not Detected	CTGGGAGGAAGGTGA	MIMAT0027875					0
mmu-miR-6986-5p	1.63844	0.712327	1.63844	up	0.1	0.1	-2.60961	-3.32194	Not Detected	Not Detected	TGGCTTTCTACCTAGCT	MIMAT0027874					0
mmu-miR-6987-3p	1.63844	0.712327	1.63844	up	0.1	0.1	-2.60961	-3.32194	Not Detected	Not Detected	CTGGAAGCAGGGAGA	MIMAT0027877					0
mmu-miR-6987-5p	1.04359	0.0615511	1.04359	up	91.0597	283.061	7.35936	7.29781	Detected	Detected	CTCACCCTGTCACCC	MIMAT0027876					0
mmu-miR-6988-3p	1.63844	0.712327	1.63844	up	0.1	0.1	-2.60961	-3.32194	Not Detected	Not Detected	CTGGCAGGAGATACAG	MIMAT0027879					0
mmu-miR-6988-5p	-4.07362	-2.02631	4.07362	down	3.13413	54.1711	2.8381	4.86441	Detected	Detected	TGGGCCTCAGCTCT	MIMAT0027878					0
mmu-miR-6989-3p	1.63844	0.712327	1.63844	up	0.1	0.1	-2.60961	-3.32194	Not Detected	Not Detected	CTGGGACCAGAGACA	MIMAT0027881					0
mmu-miR-6989-5p	-7.31569	-2.87099	7.31569	down	0.1	14.3671	-2.60961	0.261382	Not Detected	Detected	CATCCTGTGCCTCTG	MIMAT0027880					0
mmu-miR-6990-3p	1.63844	0.712327	1.63844	up	0.1	0.1	-2.60961	-3.32194	Not Detected	Not Detected	CTGCCAGGAAGAGGC	MIMAT0027883					0
mmu-miR-6990-5p	2.35159	1.23364	2.35159	up	77.1541	116.689	7.16005	5.92641	Detected	Detected	AGAGCCCTGACTCACC	MIMAT0027882					0
mmu-miR-6991-3p	1.63844	0.712327	1.63844	up	0.1	0.1	-2.60961	-3.32194	Not Detected	Not Detected	CTGGAGAAGAACAAAGG	MIMAT0027885					0
mmu-miR-6991-5p	-1.06459	-0.0902929	1.06459	down	14.8839	54.6229	4.79387	4.88416	Detected	Detected	CAGGCCCAGTCCC	MIMAT0027884					0
mmu-miR-6992-3p	1.63844	0.712327	1.63844	up	0.1	0.1	-2.60961	-3.32194	Not Detected	Not Detected	CTGCAAATGATCATCAGT	MIMAT0027887					0
mmu-miR-6992-5p	1.63844	0.712327	1.63844	up	0.1	0.1	-2.60961	-3.32194	Not Detected	Not Detected	ACTCAGCCAAACCATC	MIMAT0027886					0
mmu-miR-6993-3p	1.63844	0.712327	1.63844	up	0.1	0.1	-2.60961	-3.32194	Not Detected	Not Detected	CTGTGAGGAAACAAACG	MIMAT0027889					0
mmu-miR-6993-5p	12.1038	3.59739	12.1038	up	7.39315	12.6638	3.76775	0.170357	Detected	Detected	GACAGACACCCGTTT	MIMAT0027888					0
mmu-miR-6994-3p	1.63844	0.712327	1.63844	up	0.1	0.1	-2.60961	-3.32194	Not Detected	Not Detected	GCAAAGACGGAGAAGA	MIMAT0027891					0
mmu-miR-6994-5p	2.29613	1.1992	2.29613	up	19.5597	28.8197	5.1986	3.9994	Detected	Detected	TCACCGGCTTCACC	MIMAT0027890					0
mmu-miR-6995-3p	1.63844	0.712327	1.63844	up	0.1	0.1	-2.60961	-3.32194	Not Detected	Not Detected	CTGTGAGAGGAAGGG	MIMAT0027893					0
mmu-miR-6995-5p	1.43834	0.524409	1.43834	up	130.642	313.843	7.96056	7.43615	Detected	Detected	TGGTTTCCCCCTTCT	MIMAT0027892					0
mmu-miR-6996-3p	1.63844	0.712327	1.63844	up	0.1	0.1	-2.60961	-3.32194	Not Detected	Not Detected	CTGCAGAGTGACCAG	MIMAT0027895					0
mmu-miR-6996-5p	-59.2241	-5.88811	59.2241	down	0.1	19.9037	-2.60961	3.2785	Not Detected	Detected	GACTGTGCTCTGTCC	MIMAT0027894					0
mmu-miR-6997-3p	1.63844	0.712327	1.63844	up	0.1	0.1	-2.60961	-3.32194	Not Detected	Not Detected	GGAAACAGGAGGGTAA	MIMAT0027897					0
mmu-miR-6997-5p	-3.8257	-1.93572	3.8257	down	22.0327	293.079	5.401	7.33672	Detected	Detected	TCTGCACCTCTCCAGC	MIMAT0027896					0
mmu-miR-6998-3p	1.63844	0.712327	1.63844	up	0.1	0.1	-2.60961	-3.32194	Not Detected	Not Detected	TGTGTGGGCACAGAG	MIMAT0027899					0
mmu-miR-6998-5p	-1.70133	-0.766664	1.70133	down	11.0722	64.4757	4.32954	5.09621	Detected	Detected	AGTCACTTTGCCCTCT	MIMAT0027898					0
mmu-miR-6999-3p	1.63844	0.712327	1.63844	up	0.1	0.1	-2.60961	-3.32194	Not Detected	Not Detected	ACAGAAAGGAGGACAGC	MIMAT0027901					0
mmu-miR-6999-5p	-1.43728	-0.52334	1.43728	down	11.0576	53.5203	4.32607	4.84941	Detected	Detected	GTGCTTGCTGACTCTC	MIMAT0027900					0
mmu-miR-700-3p	2.37777	1.24961	2.37777	up	18.5248	26.762	5.12781	3.8782	Detected	Detected	GGTGGACTCGGTTCC	MIMAT0003490	chr4	134972542	134972529	+	0
mmu-miR-700-5p	1.63844	0.712327	1.63844	up	0.1	0.1	-2.60961	-3.32194	Not Detected	Not Detected	GCAAGCACAGGAAGG	MIMAT0017256	chr4	134972502	134972489	+	0
mmu-miR-7000-3p	1.63844	0.712327	1.63844	up	0.1	0.1	-2.60961	-3.32194	Not Detected	Not Detected	CTGGAGGACAGGCA	MIMAT0027903					0
mmu-miR-7000-5p	1.63844	0.712327	1.63844	up	0.1	0.1	-2.60961	-3.32194	Not Detected	Not Detected	TCTGTCCAGATACCTGT	MIMAT0027902					0
mmu-miR-7001-3p	1.63844	0.712327	1.63844	up	0.1	0.1	-2.60961	-3.32194	Not Detected	Not Detected	CTGCAGAGGGAGTGT	MIMAT0027905					0
mmu-miR-7001-5p	-52.9585	-5.72679	52.9585	down	0.1	18.5961	-2.60961	3.11718	Not Detected	Detected	ATGCTCACGCTCACA	MIMAT0027904					0
mmu-miR-7002-3p	-6.70857	-2.74601	6.70857	down	0.1	12.0814	-2.60961	0.136394	Not Detected	Detected	CTGGCAAGGGGAAG	MIMAT0027907					0
mmu-miR-7002-5p	8.28078	3.04977	8.28078	up	390.604	156.887	9.38606	6.33629	Detected	Detected	CCACGTACTCCCCG	MIMAT0027906					0
mmu-miR-7003-3p	8.02965	3.00534	8.02965	up	3.8756	11.0379	3.07657	0.0712296	Detected	Detected	CTGTGGGGAAAACCC	MIMAT0027911					0
mmu-miR-7003-5p	1847.64	10.8515	1847.64	up	100.874	0.1	7.52953	-3.32194	Detected	Not Detected	CTGCCGCAGCTTC	MIMAT0027910					0
mmu-miR-7004-3p	1.63844	0.712327	1.63844	up	0.1	0.1	-2.60961	-3.32194	Not Detected	Not Detected	CTGCGTGAAGGAGG	MIMAT0027913					0
mmu-miR-7004-5p	1.63844	0.712327	1.63844	up	0.1	0.1	-2.60961	-3.32194	Not Detected	Not Detected	ACGGCACAGGCCT	MIMAT0027912					0
mmu-miR-7005-3p	12.6494	3.661	12.6494	up	6.6499	9.60603	3.632	-0.0289938	Detected	Detected	TGCAAGGGATGGGTAG	MIMAT0027915					0
mmu-miR-7005-5p	-5.94809	-2.57243	5.94809	down	339.497	6179.74	9.16886	11.7413	Detected	Detected	TGCTGGTCCTCCCA	MIMAT0027914					0
mmu-miR-7006-3p	1.63844	0.712327	1.63844	up	0.1	0.1	-2.60961	-3.32194	Not Detected	Not Detected	CTGGGGATCCAGGT	MIMAT0027917					0
mmu-miR-7006-5p	158.897	7.31195	158.897	up	8.84534	0.1	3.99001	-3.32194	Detected	Not Detected	GGTTCCCAAGTCTTGA	MIMAT0027916					0
mmu-miR-7007-3p	1.63844	0.712327	1.63844	up	0.1	0.1	-2.60961	-3.32194	Not Detected	Not Detected	AGAAGAAACGTGGATGG	MIMAT0027919					0
mmu-miR-7007-5p	7.20193	2.84838	7.20193	up	391.781	178.004	9.38962	6.54123	Detected	Detected	ATCTCCTCCACTGCC	MIMAT0027918					0
mmu-miR-7008-3p	1.63844	0.712327	1.63844	up	0.1	0.1	-2.60961	-3.32194	Not Detected	Not Detected	CTGAGAAGAGGCAAGA	MIMAT0027921					0
mmu-miR-7008-5p	-1.0269	-0.0382972	1.0269	down	35.5696	138.288	6.11513	6.15342	Detected	Detected	GTACGGCTCCTGGC	MIMAT0027920					0
mmu-miR-7009-5p	3.00115	1.58551	3.00115	up	173.71	191.902	8.27703	6.69151	Detected	Detected	AGCTCTGGTCCCCTG	MIMAT0027922					0
mmu-miR-701-3p	1.63844	0.712327	1.63844	up	0.1	0.1	-2.60961	-3.32194	Not Detected	Not Detected	GCTAGCCTCTTTAATAGATA	MIMAT0017257	chr5	111433228	111433246	-	0
mmu-miR-701-5p	-5.41203	-2.43617	5.41203	down	0.1	7.86279	-2.60961	-0.173443	Not Detected	Detected	TCCATCTATTTCAGCGG	MIMAT0003491	chr5	111433194	111433209	-	0
mmu-miR-7010-3p	1.63844	0.712327	1.63844	up	0.1	0.1	-2.60961	-3.32194	Not Detected	Not Detected	CTGCAAAGGAAAGGAG	MIMAT0027925					0
mmu-miR-7010-5p	1.63844	0.712327	1.63844	up	0.1	0.1	-2.60961	-3.32194	Not Detected	Not Detected	TCAAGTTTCCCAATCCT	MIMAT0027924					0
mmu-miR-7011-3p	-5.83779	-2.54542	5.83779	down	0.1	9.14858	-2.60961	-0.06419	Not Detected	Detected	CTAGAGGAGGAGGGAA	MIMAT0027927					0
mmu-miR-7011-5p	2.67386	1.41892	2.67386	up	367.736	444.467	9.26638	7.84746	Detected	Detected	ACACCTCCCTCTCCC	MIMAT0027926					0
mmu-miR-7012-3p	1.63844	0.712327	1.63844	up	0.1	0.1	-2.60961	-3.32194	Not Detected	Not Detected	CTGGGAGAGGAGCC	MIMAT0027929					0
mmu-miR-7012-5p	-1.79865	-0.846917	1.79865	down	7.2165	44.5658	3.74603	4.59295	Detected	Detected	AGTCCCTGCCAACTC	MIMAT0027928					0
mmu-miR-7013-3p	1.63844	0.712327	1.63844	up	0.1	0.1	-2.60961	-3.32194	Not Detected	Not Detected	AGGAAGAGGCAACAGT	MIMAT0027931					0
mmu-miR-7013-5p	1.63844	0.712327	1.63844	up	0.1	0.1	-2.60961	-3.32194	Not Detected	Not Detected	CTACAACACTGGCCTC	MIMAT0027930					0
mmu-miR-7014-3p	-3.78694	-1.92103	3.78694	down	0.1	3.84977	-2.60961	-0.688578	Not Detected	Detected	CTGTGGTTGGTATGAAA	MIMAT0027933					0
mmu-miR-7014-5p	19.1866	4.26203	19.1866	up	704.672	110.489	10.1185	5.85644	Detected	Detected	CTGTCCCTTCCACAG	MIMAT0027932					0
mmu-miR-7015-3p	1.63844	0.712327	1.63844	up	0.1	0.1	-2.60961	-3.32194	Not Detected	Not Detected	CTAGTGCAGAGGACAG	MIMAT0027935					0
mmu-miR-7015-5p	-4.41457	-2.14227	4.41457	down	11.1577	173.568	4.36225	6.50452	Detected	Detected	GAACCCACAGCCTAC	MIMAT0027934					0
mmu-miR-7016-3p	1.75501	0.811481	1.75501	up	8.14625	18.3628	3.88805	3.07657	Detected	Detected	CTGGGGAGAGCAGG	MIMAT0027937					0
mmu-miR-7016-5p	8.13474	3.0241	8.13474	up	421.166	167.93	9.46384	6.43974	Detected	Detected	CTACTCTCGCTCCCC	MIMAT0027936					0
mmu-miR-7017-3p	2.30203	1.20291	2.30203	up	10.5818	17.8757	4.24153	3.03862	Detected	Detected	CTGGAGGGAGAGGAG	MIMAT0027939					0
mmu-miR-7017-5p	-6.56824	-2.71551	6.56824	down	0.1	11.5813	-2.60961	0.105895	Not Detected	Detected	ACAGCCCTAGTCTCAC	MIMAT0027938					0
mmu-miR-7018-3p	1.63844	0.712327	1.63844	up	0.1	0.1	-2.60961	-3.32194	Not Detected	Not Detected	CTGCAAGCCGGCA	MIMAT0027941					0
mmu-miR-7018-5p	1.52395	0.607819	1.52395	up	392.868	805.175	9.39747	8.78965	Detected	Detected	CCCCACCACTCCC	MIMAT0027940					0
mmu-miR-7019-3p	1.63844	0.712327	1.63844	up	0.1	0.1	-2.60961	-3.32194	Not Detected	Not Detected	CTGCAGAGAGGCGG	MIMAT0027943					0
mmu-miR-7019-5p	-3.73556	-1.90133	3.73556	down	4.70709	68.0257	3.2746	5.17593	Detected	Detected	ACTCCTGACAGCCCC	MIMAT0027942					0
mmu-miR-702-3p	2.12731	1.08903	2.12731	up	21.1191	33.3984	5.30457	4.21554	Detected	Detected	GGAGCGGGGTAAAG	MIMAT0003492					0
mmu-miR-702-5p	-4.81766	-2.26833	4.81766	down	0.1	6.23059	-2.60961	-0.34128	Not Detected	Detected	CATGCCAACCACCC	MIMAT0022931					0
mmu-miR-7020-3p	1.63844	0.712327	1.63844	up	0.1	0.1	-2.60961	-3.32194	Not Detected	Not Detected	CTGGGAGAGAAGAGAG	MIMAT0027945					0
mmu-miR-7020-5p	1.12388	0.168482	1.12388	up	137.901	449.682	8.02879	7.86031	Detected	Detected	CTGGTCACCCTCTCC	MIMAT0027944					0
mmu-miR-7021-3p	1.63844	0.712327	1.63844	up	0.1	0.1	-2.60961	-3.32194	Not Detected	Not Detected	CTAAGGAGCAGAAGCA	MIMAT0027947					0
mmu-miR-7021-5p	1.63844	0.712327	1.63844	up	0.1	0.1	-2.60961	-3.32194	Not Detected	Not Detected	TTGCTCTGTAATCAACTCC	MIMAT0027946					0
mmu-miR-7022-3p	2.04097	1.02925	2.04097	up	39.0625	68.9458	6.22785	5.1986	Detected	Detected	TGGGGGCAGAGGTC	MIMAT0027949					0
mmu-miR-7022-5p	3.80968	1.92967	3.80968	up	29.3754	26.4585	5.78734	3.85767	Detected	Detected	AAACAGAGCCCTTCCT	MIMAT0027948					0
mmu-miR-7023-3p	-6.58594	-2.71939	6.58594	down	0.1	11.6437	-2.60961	0.109777	Not Detected	Detected	CTGAGGGGCGCAG	MIMAT0027951					0
mmu-miR-7023-5p	9.21269	3.20362	9.21269	up	5.23169	13.0204	3.39401	0.190389	Detected	Detected	ACGCCCAATCCCAG	MIMAT0027950					0
mmu-miR-7024-3p	1.63844	0.712327	1.63844	up	0.1	0.1	-2.60961	-3.32194	Not Detected	Not Detected	CTGTAGGGAGCAGGG	MIMAT0027953					0
mmu-miR-7024-5p	-6.10346	-2.60963	6.10346	down	0.1	10.0002	-2.60961	1.51e-05	Not Detected	Detected	GCCAAGCAACCCATC	MIMAT0027952					0
mmu-miR-7025-3p	1.63844	0.712327	1.63844	up	0.1	0.1	-2.60961	-3.32194	Not Detected	Not Detected	CTGGTGAGCTGGAGT	MIMAT0027955					0
mmu-miR-7025-5p	1.24905	0.320828	1.24905	up	10.5969	27.789	4.24865	3.92782	Detected	Detected	GGGAGCCACCAGC	MIMAT0027954					0
mmu-miR-7026-3p	1.63844	0.712327	1.63844	up	0.1	0.1	-2.60961	-3.32194	Not Detected	Not Detected	CTAAGCCAAGACCAGA	MIMAT0027957					0
mmu-miR-7026-5p	1.63844	0.712327	1.63844	up	0.1	0.1	-2.60961	-3.32194	Not Detected	Not Detected	ATATACCCCATGGTCTCA	MIMAT0027956					0
mmu-miR-7027-3p	1.63844	0.712327	1.63844	up	0.1	0.1	-2.60961	-3.32194	Not Detected	Not Detected	CTGGAAGAGGAGAGAAA	MIMAT0027959					0
mmu-miR-7027-5p	2.0829	1.05859	2.0829	up	29.8792	50.3045	5.81495	4.75636	Detected	Detected	GCTCTGCTGTTTCTTC	MIMAT0027958					0
mmu-miR-7028-3p	1.30891	0.388367	1.30891	up	5.03922	17.3679	3.36279	2.97442	Detected	Detected	CTGGCCGAGGGG	MIMAT0027961					0
mmu-miR-7028-5p	-1.18727	-0.247647	1.18727	down	36.5638	161.777	6.15059	6.39823	Detected	Detected	CTCCTGACCCAAGC	MIMAT0027960					0
mmu-miR-7029-3p	1.63844	0.712327	1.63844	up	0.1	0.1	-2.60961	-3.32194	Not Detected	Not Detected	GATCTGGACACACAGA	MIMAT0027963					0
mmu-miR-7029-5p	1.63844	0.712327	1.63844	up	0.1	0.1	-2.60961	-3.32194	Not Detected	Not Detected	GCGCTGGCAGCC	MIMAT0027962					0
mmu-miR-703	1.36983	0.453994	1.36983	up	8.94372	22.1375	4.00775	3.55376	Detected	Detected	TTCTTTCCTTCTGAAGGTT	MIMAT0003493					0
mmu-miR-7030-3p	1.63844	0.712327	1.63844	up	0.1	0.1	-2.60961	-3.32194	Not Detected	Not Detected	CTGGAGAGATAACAGAGC	MIMAT0027965					0
mmu-miR-7030-5p	-4.11405	-2.04056	4.11405	down	0.1	4.54356	-2.60961	-0.569052	Not Detected	Detected	GACTAGCACAGCCAC	MIMAT0027964					0
mmu-miR-7031-3p	1.63844	0.712327	1.63844	up	0.1	0.1	-2.60961	-3.32194	Not Detected	Not Detected	CTAGGAGAGGGCAAGA	MIMAT0027967					0
mmu-miR-7031-5p	1.34328	0.425761	1.34328	up	69.7906	184.073	7.02792	6.60216	Detected	Detected	TCCCACCCTTCAGGC	MIMAT0027966					0
mmu-miR-7032-3p	1.63844	0.712327	1.63844	up	0.1	0.1	-2.60961	-3.32194	Not Detected	Not Detected	TGCAGGGCGGTACC	MIMAT0027969					0
mmu-miR-7032-5p	-2.51459	-1.33032	2.51459	down	36.1016	320.772	6.13683	7.46715	Detected	Detected	ACCACCCTCTCGGG	MIMAT0027968					0
mmu-miR-7033-3p	21.9914	4.45887	21.9914	up	459.692	64.7918	9.56173	5.10286	Detected	Detected	CTGCCCAAGAGAATGG	MIMAT0027971					0
mmu-miR-7033-5p	11.2887	3.49681	11.2887	up	996.003	275.956	10.717	7.22022	Detected	Detected	CCTGCCCCTCAGAC	MIMAT0027970					0
mmu-miR-7034-3p	1.63844	0.712327	1.63844	up	0.1	0.1	-2.60961	-3.32194	Not Detected	Not Detected	TGTAGGGTAGGGAAGG	MIMAT0027973					0
mmu-miR-7034-5p	-2.7924	-1.48151	2.7924	down	3.97954	43.953	3.09571	4.57722	Detected	Detected	AGCACATCCATCCCTC	MIMAT0027972					0
mmu-miR-7035-3p	1.63844	0.712327	1.63844	up	0.1	0.1	-2.60961	-3.32194	Not Detected	Not Detected	CTGCAGGGACAGCG	MIMAT0027975					0
mmu-miR-7035-5p	-87.5171	-6.45149	87.5171	down	0.1	26.1291	-2.60961	3.84188	Not Detected	Detected	TTCTGAGCCACTCTCC	MIMAT0027974					0
mmu-miR-7036a-3p	-4.34837	-2.12048	4.34837	down	0.1	5.07587	-2.60961	-0.489136	Not Detected	Detected	CTGGGAGGAGCGG	MIMAT0027977	chr5	137296688	137296677	+	0
mmu-miR-7036a-5p	-3.89251	-1.9607	3.89251	down	1580.84	25093.6	11.4922	13.4529	Detected	Detected	TCTCTTCCCCACCGA	MIMAT0027976	chr5	137296651	137296638	+	0
mmu-miR-7036b-3p	1.15906	0.212954	1.15906	up	9.83083	27.7054	4.13532	3.92237	Detected	Detected	GGACCCCGAGGC	MIMAT0029809					0
mmu-miR-7036b-5p	1.63844	0.712327	1.63844	up	0.1	0.1	-2.60961	-3.32194	Not Detected	Not Detected	GCTTCCACAGAGAACC	MIMAT0029808					0
mmu-miR-7037-3p	1.63844	0.712327	1.63844	up	0.1	0.1	-2.60961	-3.32194	Not Detected	Not Detected	CTGCAGGTGACATTAGG	MIMAT0027979					0
mmu-miR-7037-5p	-127.315	-6.99225	127.315	down	0.1	38.2598	-2.60961	4.38264	Not Detected	Detected	ACCATGATCTCCTGTGG	MIMAT0027978					0
mmu-miR-7038-3p	1.63844	0.712327	1.63844	up	0.1	0.1	-2.60961	-3.32194	Not Detected	Not Detected	CTGTAAGAAGGCAGGA	MIMAT0027981					0
mmu-miR-7038-5p	-49.9335	-5.64194	49.9335	down	0.1	17.807	-2.60961	3.03232	Not Detected	Detected	CACAGCAGCCCTTC	MIMAT0027980					0
mmu-miR-7039-3p	-5.35584	-2.42111	5.35584	down	0.1	7.70037	-2.60961	-0.1885	Not Detected	Detected	CTGGAAGGGAGGGC	MIMAT0027983					0
mmu-miR-7039-5p	873.138	9.77007	873.138	up	509.63	9.94703	9.76623	-0.00383103	Detected	Detected	ACGCGATGCTCTCC	MIMAT0027982					0
mmu-miR-704	1.63844	0.712327	1.63844	up	0.1	0.1	-2.60961	-3.32194	Not Detected	Not Detected	CTAGGAGCAGAGCAC	MIMAT0003494					0
mmu-miR-7040-3p	1.63844	0.712327	1.63844	up	0.1	0.1	-2.60961	-3.32194	Not Detected	Not Detected	CTACGTGAGAGAGAGG	MIMAT0027985					0
mmu-miR-7040-5p	2.85091	1.51142	2.85091	up	157.082	186.431	8.14093	6.62951	Detected	Detected	CGCCTCCATCTCCC	MIMAT0027984					0
mmu-miR-7041-3p	1.63844	0.712327	1.63844	up	0.1	0.1	-2.60961	-3.32194	Not Detected	Not Detected	CTGAGGGAAGAAGAGAA	MIMAT0027987					0
mmu-miR-7041-5p	-3.63375	-1.86146	3.63375	down	0.1	3.5446	-2.60961	-0.748153	Not Detected	Detected	TCAACTGAGTCTCCATTC	MIMAT0027986					0
mmu-miR-7042-3p	1.63844	0.712327	1.63844	up	0.1	0.1	-2.60961	-3.32194	Not Detected	Not Detected	CTGAGAGAAAACAAAGGG	MIMAT0027989					0
mmu-miR-7042-5p	-2.56726	-1.36023	2.56726	down	1252.6	11781.7	11.1756	12.5358	Detected	Detected	GTGGCCCTTCTGCT	MIMAT0027988					0
mmu-miR-7043-3p	1.63844	0.712327	1.63844	up	0.1	0.1	-2.60961	-3.32194	Not Detected	Not Detected	CTGAAAACAGAGAGGC	MIMAT0027991					0
mmu-miR-7043-5p	-1.8956	-0.922652	1.8956	down	24.9435	175.91	5.59364	6.51629	Detected	Detected	AAAAATGCCTCTCTGCTT	MIMAT0027990					0
mmu-miR-7044-3p	1.63844	0.712327	1.63844	up	0.1	0.1	-2.60961	-3.32194	Not Detected	Not Detected	CTGTGAGGGTCGGG	MIMAT0027993					0
mmu-miR-7044-5p	-2.45552	-1.29603	2.45552	down	118.07	941.403	7.79996	9.09599	Detected	Detected	GCCGCCACCACC	MIMAT0027992					0
mmu-miR-7045-3p	1.3243	0.405235	1.3243	up	29.6138	81.0318	5.80623	5.401	Detected	Detected	CTGTGCGGGGGA	MIMAT0027995					0
mmu-miR-7045-5p	2.12354	1.08647	2.12354	up	364.527	507.437	9.23156	8.14509	Detected	Detected	AGTCCCCCTCCCC	MIMAT0027994					0
mmu-miR-7046-3p	1.74306	0.801622	1.74306	up	29.9484	61.3326	5.8261	5.02448	Detected	Detected	CTGTAGGGGGATGGG	MIMAT0027997					0
mmu-miR-7046-5p	1.6418	0.715282	1.6418	up	170.175	332.369	8.22563	7.51035	Detected	Detected	CCTGGCTCCCAGC	MIMAT0027996					0
mmu-miR-7047-3p	14.9709	3.90409	14.9709	up	8.48074	10.6426	3.94901	0.0449281	Detected	Detected	GGAAGGAGGAAGGGT	MIMAT0027999					0
mmu-miR-7047-5p	3.98533	1.9947	3.98533	up	4217.48	4271.41	13.1703	11.1756	Detected	Detected	TCAGACCCAGCCCT	MIMAT0027998					0
mmu-miR-7048-3p	-5.94146	-2.57082	5.94146	down	0.1	9.47639	-2.60961	-0.0387952	Not Detected	Detected	CTGGGGAAAGAGAATGG	MIMAT0028001					0
mmu-miR-7048-5p	2.54818	1.34947	2.54818	up	1009.59	1146.13	10.7355	9.38606	Detected	Detected	GCTTCCTCACCTCTC	MIMAT0028000					0
mmu-miR-7049-3p	1.63844	0.712327	1.63844	up	0.1	0.1	-2.60961	-3.32194	Not Detected	Not Detected	CTGAGGCAGACAGGG	MIMAT0028003					0
mmu-miR-7049-5p	1.86157	0.896524	1.86157	up	14.8966	27.2175	4.7948	3.89828	Detected	Detected	CCGCCTACCTGACT	MIMAT0028002					0
mmu-miR-705	-1.53569	-0.618885	1.53569	down	109.017	571.748	7.68982	8.3087	Detected	Detected	TGCCCACCCCACC	MIMAT0003495					0
mmu-miR-7050-3p	11.8616	3.56822	11.8616	up	7.54004	13.6592	3.79316	0.224939	Detected	Detected	CTGGGGAGATAAAGGC	MIMAT0028005					0
mmu-miR-7050-5p	1.99136	0.993753	1.99136	up	369.56	553.912	9.27078	8.27703	Detected	Detected	TCTCTCACCCCCTTC	MIMAT0028004					0
mmu-miR-7051-3p	1.63844	0.712327	1.63844	up	0.1	0.1	-2.60961	-3.32194	Not Detected	Not Detected	GCACACAGGAATCAGT	MIMAT0028007					0
mmu-miR-7051-5p	58.1947	5.86282	58.1947	up	35.0078	13.8802	6.09933	0.236515	Detected	Detected	TGACCCAACTTCCTCC	MIMAT0028006					0
mmu-miR-7052-3p	2.60187	1.37955	2.60187	up	13.5353	19.7183	4.63298	3.25343	Detected	Detected	CTGGGAAGGAGGGG	MIMAT0028009					0
mmu-miR-7052-5p	-2.14057	-1.098	2.14057	down	13.5366	101.226	4.63887	5.73687	Detected	Detected	AAAGGCCTCCACCTT	MIMAT0028008					0
mmu-miR-7053-3p	11.0343	3.46392	11.0343	up	6.22942	11.3263	3.55376	0.0898371	Detected	Detected	CTGGGGAAGGAGACA	MIMAT0028011					0
mmu-miR-7053-5p	1.05696	0.0799246	1.05696	up	4.29612	18.3641	3.17563	3.09571	Detected	Detected	CCAGTAGCCTGCCT	MIMAT0028010					0
mmu-miR-7054-3p	-29.5173	-4.88349	29.5173	down	0.1	15.0951	-2.60961	2.27387	Not Detected	Detected	CTGGAAGGGGCCA	MIMAT0028013					0
mmu-miR-7054-5p	19.046	4.25141	19.046	up	6.6055	4.20823	3.62706	-0.624357	Detected	Detected	AGTACTCAGCCCAACC	MIMAT0028012					0
mmu-miR-7055-3p	2.06444	1.04575	2.06444	up	20.8348	33.6439	5.28198	4.23623	Detected	Detected	CTGGTGGGGTATCAAA	MIMAT0028015					0
mmu-miR-7055-5p	1.63844	0.712327	1.63844	up	0.1	0.1	-2.60961	-3.32194	Not Detected	Not Detected	CCAACTCAGATAACCCA	MIMAT0028014					0
mmu-miR-7056-3p	-5.8162	-2.54008	5.8162	down	0.1	9.08104	-2.60961	-0.0695353	Not Detected	Detected	CTGTGGTGGGAGACA	MIMAT0028017					0
mmu-miR-7056-5p	-1.57033	-0.651067	1.57033	down	66.5198	341.517	6.89215	7.54322	Detected	Detected	AACCTCTCTGTCCTCC	MIMAT0028016					0
mmu-miR-7057-3p	-5.54645	-2.47157	5.54645	down	0.1	8.25824	-2.60961	-0.138047	Not Detected	Detected	GGTGGAGAAAGACATCA	MIMAT0028019					0
mmu-miR-7057-5p	5.88964	2.55818	5.88964	up	53.0306	30.4267	6.63809	4.07991	Detected	Detected	AACTTGAGTCCTCTCCT	MIMAT0028018					0
mmu-miR-7058-3p	1.63844	0.712327	1.63844	up	0.1	0.1	-2.60961	-3.32194	Not Detected	Not Detected	CTGGAAGAAAGGAAGGA	MIMAT0028021					0
mmu-miR-7058-5p	-2.51631	-1.33131	2.51631	down	39.105	355.8	6.24786	7.57917	Detected	Detected	ACTTCCACGGTCACC	MIMAT0028020					0
mmu-miR-7059-3p	1.63844	0.712327	1.63844	up	0.1	0.1	-2.60961	-3.32194	Not Detected	Not Detected	CTGGGAGGACAAACA	MIMAT0028023					0
mmu-miR-7059-5p	1.63844	0.712327	1.63844	up	0.1	0.1	-2.60961	-3.32194	Not Detected	Not Detected	ACTGAAAGCCGCAGT	MIMAT0028022					0
mmu-miR-706	-1.55054	-0.632771	1.55054	down	5.02655	28.5438	3.35724	3.99001	Detected	Detected	TTTTTTGAGACAGGGTTTC	MIMAT0003496					0
mmu-miR-7060-3p	1.63844	0.712327	1.63844	up	0.1	0.1	-2.60961	-3.32194	Not Detected	Not Detected	CTGAGTAGAAGGTAGAGT	MIMAT0028025					0
mmu-miR-7060-5p	1.02923	0.0415721	1.02923	up	3.10704	16.0273	2.82592	2.78435	Detected	Detected	TCCCATTCTACCCAGC	MIMAT0028024					0
mmu-miR-7061-3p	1.63844	0.712327	1.63844	up	0.1	0.1	-2.60961	-3.32194	Not Detected	Not Detected	CTAAAAGGAAATAAAAGGGA	MIMAT0028027					0
mmu-miR-7061-5p	-6.92798	-2.79244	6.92798	down	0.1	12.8846	-2.60961	0.182824	Not Detected	Detected	AAAATCACCTCCTATTTCC	MIMAT0028026					0
mmu-miR-7062-3p	2.06158	1.04375	2.06158	up	16.3045	27.3416	4.9471	3.90335	Detected	Detected	CTGTGGGGCCAGG	MIMAT0028029					0
mmu-miR-7062-5p	1.63844	0.712327	1.63844	up	0.1	0.1	-2.60961	-3.32194	Not Detected	Not Detected	AGACACTCCACAAGCT	MIMAT0028028					0
mmu-miR-7063-3p	1.59205	0.670885	1.59205	up	7.49747	18.502	3.77952	3.10864	Detected	Detected	CTTAAGAGGGGCAGAG	MIMAT0028031					0
mmu-miR-7063-5p	1.70756	0.771935	1.70756	up	11.481	23.0332	4.39265	3.62071	Detected	Detected	TGTGCTCAGCCTGC	MIMAT0028030					0
mmu-miR-7064-3p	1.63844	0.712327	1.63844	up	0.1	0.1	-2.60961	-3.32194	Not Detected	Not Detected	AGAGAGACATAAAGGGCC	MIMAT0028033					0
mmu-miR-7064-5p	1.63844	0.712327	1.63844	up	0.1	0.1	-2.60961	-3.32194	Not Detected	Not Detected	AGCAAATGACCTTTATGCC	MIMAT0028032					0
mmu-miR-7065-3p	1.63844	0.712327	1.63844	up	0.1	0.1	-2.60961	-3.32194	Not Detected	Not Detected	CTGTGCAAACAGGAAA	MIMAT0028035					0
mmu-miR-7065-5p	202.797	7.66389	202.797	up	11.0949	0.1	4.34195	-3.32194	Detected	Not Detected	TCCTGGTTTACCTGCT	MIMAT0028034					0
mmu-miR-7066-3p	1.63844	0.712327	1.63844	up	0.1	0.1	-2.60961	-3.32194	Not Detected	Not Detected	CTGGGAGGCAGGC	MIMAT0028037					0
mmu-miR-7066-5p	5.3305	2.41427	5.3305	up	19.8931	16.0963	5.21345	2.79918	Detected	Detected	CCTCTACTCATTTCCCA	MIMAT0028036					0
mmu-miR-7067-3p	3.26318	1.70628	3.26318	up	33.6358	35.6869	6.00459	4.29831	Detected	Detected	CTGTGGGGAGGGAA	MIMAT0028039					0
mmu-miR-7067-5p	1.63844	0.712327	1.63844	up	0.1	0.1	-2.60961	-3.32194	Not Detected	Not Detected	TCCGTGTGCAACCA	MIMAT0028038					0
mmu-miR-7068-3p	1.63844	0.712327	1.63844	up	0.1	0.1	-2.60961	-3.32194	Not Detected	Not Detected	CTGAGAGTCAGTCCAG	MIMAT0028043					0
mmu-miR-7068-5p	-1.17221	-0.229235	1.17221	down	26.8398	115.211	5.68735	5.91658	Detected	Detected	CCACCCCATACTGAG	MIMAT0028042					0
mmu-miR-7069-3p	2.15656	1.10873	2.15656	up	8.18891	16.0682	3.90335	2.79462	Detected	Detected	TGTAGGGGTTGGCAG	MIMAT0028045					0
mmu-miR-7069-5p	-1.74561	-0.803727	1.74561	down	9.01764	52.9055	4.01863	4.82236	Detected	Detected	GTGTCACCCTCCCA	MIMAT0028044					0
mmu-miR-707	1.63844	0.712327	1.63844	up	0.1	0.1	-2.60961	-3.32194	Not Detected	Not Detected	CGTAGGCAAGCGGCA	MIMAT0003497					0
mmu-miR-7070-3p	-6.49403	-2.69911	6.49403	down	0.1	11.321	-2.60961	0.0895021	Not Detected	Detected	CTGGAGGGAAGGAGA	MIMAT0028047					0
mmu-miR-7070-5p	1.08442	0.11693	1.08442	up	119.345	406.739	7.84746	7.73053	Detected	Detected	TCCTGCCTCAGCTCC	MIMAT0028046					0
mmu-miR-7071-3p	1.63844	0.712327	1.63844	up	0.1	0.1	-2.60961	-3.32194	Not Detected	Not Detected	CTGCGGGAACCGA	MIMAT0028049					0
mmu-miR-7071-5p	1.63844	0.712327	1.63844	up	0.1	0.1	-2.60961	-3.32194	Not Detected	Not Detected	CGCTGCAGCACCT	MIMAT0028048					0
mmu-miR-7072-3p	10.9004	3.44631	10.9004	up	6.34584	11.8685	3.56988	0.123572	Detected	Detected	CTGGGGAAGAAGAGAA	MIMAT0028051					0
mmu-miR-7072-5p	1.46168	0.547627	1.46168	up	22.4467	54.6217	5.4249	4.87728	Detected	Detected	GCCTTGCCTCTTGTC	MIMAT0028050					0
mmu-miR-7073-3p	1.89153	0.919556	1.89153	up	7.73094	16.7038	3.82326	2.90371	Detected	Detected	CTGTTGGGGAGGAAA	MIMAT0028053					0
mmu-miR-7073-5p	1.63844	0.712327	1.63844	up	0.1	0.1	-2.60961	-3.32194	Not Detected	Not Detected	TCATAGTCTTTCAATTCCC	MIMAT0028052					0
mmu-miR-7074-3p	1.63844	0.712327	1.63844	up	0.1	0.1	-2.60961	-3.32194	Not Detected	Not Detected	CTGCAGGGAGAGG	MIMAT0028055					0
mmu-miR-7074-5p	-7.02849	-2.81321	7.02849	down	0.1	13.2611	-2.60961	0.203602	Not Detected	Detected	ACTGGAGCCCTAGCC	MIMAT0028054					0
mmu-miR-7075-3p	1.63844	0.712327	1.63844	up	0.1	0.1	-2.60961	-3.32194	Not Detected	Not Detected	CTGGGAAAGAAGACATG	MIMAT0028057					0
mmu-miR-7075-5p	4.38585	2.13286	4.38585	up	119.969	100.779	7.85649	5.72364	Detected	Detected	AAAACCATGTCCTCCTC	MIMAT0028056					0
mmu-miR-7076-3p	2.90816	1.54011	2.90816	up	7.62643	15.0818	3.81217	2.27206	Detected	Detected	CTGGGGAGACAGTGG	MIMAT0028059					0
mmu-miR-7076-5p	-5.64353	-2.4966	5.64353	down	0.1	8.54987	-2.60961	-0.113013	Not Detected	Detected	TGAGACCATACCACCTC	MIMAT0028058					0
mmu-miR-7077-3p	1.63844	0.712327	1.63844	up	0.1	0.1	-2.60961	-3.32194	Not Detected	Not Detected	CTGCCAGGAGCCA	MIMAT0028061					0
mmu-miR-7077-5p	-5.58801	-2.48233	5.58801	down	0.1	8.38245	-2.60961	-0.127278	Not Detected	Detected	GCCTGCCATGGGA	MIMAT0028060					0
mmu-miR-7078-3p	1.63844	0.712327	1.63844	up	0.1	0.1	-2.60961	-3.32194	Not Detected	Not Detected	CTGTGGATGATAAAAAAAGT	MIMAT0028063					0
mmu-miR-7078-5p	1.63844	0.712327	1.63844	up	0.1	0.1	-2.60961	-3.32194	Not Detected	Not Detected	AGCGTCTCCTACCAC	MIMAT0028062					0
mmu-miR-7079-3p	1.63844	0.712327	1.63844	up	0.1	0.1	-2.60961	-3.32194	Not Detected	Not Detected	CTGGAAAGAGAACAGAAG	MIMAT0028065					0
mmu-miR-7079-5p	1.63844	0.712327	1.63844	up	0.1	0.1	-2.60961	-3.32194	Not Detected	Not Detected	CAGGACTCACTGCCT	MIMAT0028064					0
mmu-miR-708-3p	-2.74651	-1.4576	2.74651	down	0.1	2.02497	-2.60961	-1.15201	Not Detected	Detected	CTAGAAGCTCACAGTCT	MIMAT0003498	chr7	103398012	103398027	-	0
mmu-miR-708-5p	-1.04291	-0.0606136	1.04291	down	8.23927	28.477	3.91526	3.97587	Detected	Detected	CCCAGCTAGATTGTA	MIMAT0004828	chr7	103397969	103397982	-	0
mmu-miR-7080-3p	1.89596	0.922925	1.89596	up	17.3553	30.7281	5.02878	4.10585	Detected	Detected	AGGGAACGGAGGGG	MIMAT0028067					0
mmu-miR-7080-5p	-1.82896	-0.87102	1.82896	down	9.0473	55.6014	4.02742	4.89844	Detected	Detected	CCAAACCCACCTCC	MIMAT0028066					0
mmu-miR-7081-3p	1.63844	0.712327	1.63844	up	0.1	0.1	-2.60961	-3.32194	Not Detected	Not Detected	TGTGAGGAGGATACCAG	MIMAT0028069					0
mmu-miR-7081-5p	5.35542	2.421	5.35542	up	34.295	23.3591	6.06259	3.64159	Detected	Detected	TAATCCCCGGCCGA	MIMAT0028068					0
mmu-miR-7082-3p	1.63844	0.712327	1.63844	up	0.1	0.1	-2.60961	-3.32194	Not Detected	Not Detected	GGAGACAGACAGCAAG	MIMAT0028071					0
mmu-miR-7082-5p	4.57797	2.19471	4.57797	up	929.022	625.817	10.6067	8.41196	Detected	Detected	CCTCCCCTCCTCC	MIMAT0028070					0
mmu-miR-7083-3p	1.87351	0.905745	1.87351	up	7.0865	16.1708	3.71251	2.80676	Detected	Detected	CTGGGGTCCAGGAG	MIMAT0028073					0
mmu-miR-7083-5p	-3.78884	-1.92176	3.78884	down	3.73144	58.0618	3.02144	4.9432	Detected	Detected	TCTCTGCTTGTCCAGC	MIMAT0028072					0
mmu-miR-7084-3p	8.24205	3.043	8.24205	up	3.65694	9.47882	3.00439	-0.0386102	Detected	Detected	GCAGAGGACAGGGG	MIMAT0028075					0
mmu-miR-7084-5p	1.06148	0.0860796	1.06148	up	15.4427	50.2497	4.84163	4.75555	Detected	Detected	ACTCTCTACCTCTATCCTC	MIMAT0028074					0
mmu-miR-7085-3p	1.62752	0.702679	1.62752	up	14.5213	29.9486	4.75636	4.05368	Detected	Detected	GAAGGTGGGGAGAGG	MIMAT0028077					0
mmu-miR-7085-5p	-1.60177	-0.679663	1.60177	down	28.9815	170.236	5.77333	6.453	Detected	Detected	TCCTGCTGGCCTGC	MIMAT0028076					0
mmu-miR-7086-3p	1.63844	0.712327	1.63844	up	0.1	0.1	-2.60961	-3.32194	Not Detected	Not Detected	CTGAGGAGATATCAGAACG	MIMAT0028079					0
mmu-miR-7086-5p	-5.39042	-2.4304	5.39042	down	0.1	7.80014	-2.60961	-0.179214	Not Detected	Detected	TGCCCAAACCTTTCTC	MIMAT0028078					0
mmu-miR-7087-3p	1.53804	0.621098	1.53804	up	6.08792	16.8207	3.53632	2.91522	Detected	Detected	CTGGCAGGGGAGAG	MIMAT0028081					0
mmu-miR-7087-5p	5.72495	2.51726	5.72495	up	23.6985	17.6079	5.52166	3.00439	Detected	Detected	AGACCAGCTCCACAC	MIMAT0028080					0
mmu-miR-7088-3p	1.63844	0.712327	1.63844	up	0.1	0.1	-2.60961	-3.32194	Not Detected	Not Detected	GGAAGCAATGGAGGAA	MIMAT0028083					0
mmu-miR-7088-5p	1.27324	0.3485	1.27324	up	65.9278	176.84	6.87253	6.52403	Detected	Detected	GTTTCCCCTCCTCAC	MIMAT0028082					0
mmu-miR-7089-3p	1.63844	0.712327	1.63844	up	0.1	0.1	-2.60961	-3.32194	Not Detected	Not Detected	CTGTGGAGACAGCAG	MIMAT0028085					0
mmu-miR-7089-5p	1.63844	0.712327	1.63844	up	0.1	0.1	-2.60961	-3.32194	Not Detected	Not Detected	CCCAGGAGTCTGTAGG	MIMAT0028084					0
mmu-miR-709	-1.28994	-0.367305	1.28994	down	2221.23	9380	11.9456	12.3129	Detected	Detected	TCCTCCTGCCTC	MIMAT0003499					0
mmu-miR-7090-3p	1.63844	0.712327	1.63844	up	0.1	0.1	-2.60961	-3.32194	Not Detected	Not Detected	CTGCAAAGTCAGACATC	MIMAT0028087					0
mmu-miR-7090-5p	-5.94062	-2.57061	5.94062	down	0.1	9.47371	-2.60961	-0.0389992	Not Detected	Detected	CTCATGGTGTCCCAA	MIMAT0028086					0
mmu-miR-7091-3p	1.63844	0.712327	1.63844	up	0.1	0.1	-2.60961	-3.32194	Not Detected	Not Detected	CTAGAGACGACAGAAGC	MIMAT0028089					0
mmu-miR-7091-5p	1.63844	0.712327	1.63844	up	0.1	0.1	-2.60961	-3.32194	Not Detected	Not Detected	GCCATGGAATCTATCACC	MIMAT0028088					0
mmu-miR-7092-3p	1.63844	0.712327	1.63844	up	0.1	0.1	-2.60961	-3.32194	Not Detected	Not Detected	CTAAGGCAAACAAAACAA	MIMAT0028091					0
mmu-miR-7092-5p	1.63844	0.712327	1.63844	up	0.1	0.1	-2.60961	-3.32194	Not Detected	Not Detected	AATGATTCTGTGAGTTTGC	MIMAT0028090					0
mmu-miR-7093-3p	1.63844	0.712327	1.63844	up	0.1	0.1	-2.60961	-3.32194	Not Detected	Not Detected	CTGCAGGATGACAGAT	MIMAT0028093					0
mmu-miR-7093-5p	-36.5739	-5.19274	36.5739	down	0.1	15.5898	-2.60961	2.58313	Not Detected	Detected	AGGTTTTCCTTCTGTCAT	MIMAT0028092					0
mmu-miR-7094-3p	1.63844	0.712327	1.63844	up	0.1	0.1	-2.60961	-3.32194	Not Detected	Not Detected	TGTGGAGAGAACAGCA	MIMAT0028095					0
mmu-miR-7094b-2-5p	1.63844	0.712327	1.63844	up	0.1	0.1	-2.60961	-3.32194	Not Detected	Not Detected	TCAGACCCTGTATCCTC	MIMAT0028096					0
mmu-miR-710	1.96877	0.977291	1.96877	up	269.328	463.993	8.8899	7.91261	Detected	Detected	CTCAACTCTCCCCA	MIMAT0003500					0
mmu-miR-711	2.73877	1.45353	2.73877	up	235.794	285.009	8.75663	7.3031	Detected	Detected	CTTACATCTCTCCCCG	MIMAT0003501					0
mmu-miR-7115-3p	1.667	0.737258	1.667	up	34.9292	77.2179	6.08865	5.35139	Detected	Detected	CTGTGGGGGCAGG	MIMAT0028128					0
mmu-miR-7115-5p	1.63844	0.712327	1.63844	up	0.1	0.1	-2.60961	-3.32194	Not Detected	Not Detected	ACAATTCGGCACCAC	MIMAT0028127					0
mmu-miR-7116-3p	1.63844	0.712327	1.63844	up	0.1	0.1	-2.60961	-3.32194	Not Detected	Not Detected	CTGAGAAGGCAAAGGA	MIMAT0028130					0
mmu-miR-7116-5p	1.63844	0.712327	1.63844	up	0.1	0.1	-2.60961	-3.32194	Not Detected	Not Detected	TTTTTTTTCCTGATGTCTTC	MIMAT0028129					0
mmu-miR-7117-3p	1.7705	0.824153	1.7705	up	21.4227	41.5397	5.32896	4.5048	Detected	Detected	CTGGGGGAAAGAGAA	MIMAT0028132					0
mmu-miR-7117-5p	1.63844	0.712327	1.63844	up	0.1	0.1	-2.60961	-3.32194	Not Detected	Not Detected	TATCCTCAGCTGAGCC	MIMAT0028131					0
mmu-miR-7118-3p	1.63844	0.712327	1.63844	up	0.1	0.1	-2.60961	-3.32194	Not Detected	Not Detected	TGTGGAGGAGGACGT	MIMAT0028134					0
mmu-miR-7118-5p	2.2619	1.17753	2.2619	up	1256.36	1682.49	11.1847	10.0072	Detected	Detected	GTTCCCTCTCCCGC	MIMAT0028133					0
mmu-miR-7119-3p	1.63844	0.712327	1.63844	up	0.1	0.1	-2.60961	-3.32194	Not Detected	Not Detected	CTGGAGGAAACGGTG	MIMAT0028136					0
mmu-miR-7119-5p	1.63844	0.712327	1.63844	up	0.1	0.1	-2.60961	-3.32194	Not Detected	Not Detected	AGAAGGCACCCAATCC	MIMAT0028135					0
mmu-miR-712-3p	-1.41543	-0.501241	1.41543	down	8.51729	40.2061	3.9572	4.45844	Detected	Detected	CAACACCCGGGGGT	MIMAT0003743					0
mmu-miR-712-5p	-1.09267	-0.127858	1.09267	down	59.3248	208.259	6.74467	6.87253	Detected	Detected	GGTACCGCCCGGG	MIMAT0003502					0
mmu-miR-713	-3.57798	-1.83915	3.57798	down	0.1	3.43664	-2.60961	-0.770465	Not Detected	Detected	GCTGTGTGCCTTC	MIMAT0003504					0
mmu-miR-714	-4.3567	-2.12324	4.3567	down	44.0127	658.562	6.39979	8.52303	Detected	Detected	GCGACCGACCGGCC	MIMAT0003505					0
mmu-miR-717	-4.30634	-2.10646	4.30634	down	0.1	4.97821	-2.60961	-0.50315	Not Detected	Detected	AGAGAAGGTATCTCTGTCT	MIMAT0003510					0
mmu-miR-718	-1.37518	-0.459625	1.37518	down	10.6838	49.162	4.26424	4.72386	Detected	Detected	CGACACCCGGCCG	MIMAT0003514					0
mmu-miR-719	1.63844	0.712327	1.63844	up	0.1	0.1	-2.60961	-3.32194	Not Detected	Not Detected	AACATTTTTCTGTAGCCGAG	MIMAT0003465					0
mmu-miR-721	-1.29267	-0.370354	1.29267	down	171.866	714.424	8.25888	8.62923	Detected	Detected	TTCCCCCTTTTAATT	MIMAT0003515					0
mmu-miR-7210-3p	1.63844	0.712327	1.63844	up	0.1	0.1	-2.60961	-3.32194	Not Detected	Not Detected	AGCCACATTGTTACTTACA	MIMAT0028389					0
mmu-miR-7210-5p	-3.46054	-1.791	3.46054	down	0.1	3.21474	-2.60961	-0.818613	Not Detected	Detected	CTTTGTGCCTGTCTACA	MIMAT0028388					0
mmu-miR-7211-3p	-3.2164	-1.68545	3.2164	down	12.0377	138.029	4.46514	6.15059	Detected	Detected	GCATCCTCCCTACAGT	MIMAT0028391					0
mmu-miR-7211-5p	3.40233	1.76652	3.40233	up	10.592	15.5137	4.24313	2.4766	Detected	Detected	GGTGGAGTGGCAGA	MIMAT0028390					0
mmu-miR-7212-3p	1.63844	0.712327	1.63844	up	0.1	0.1	-2.60961	-3.32194	Not Detected	Not Detected	GACCTGGAGACGTGT	MIMAT0028393					0
mmu-miR-7212-5p	-4.94537	-2.30608	4.94537	down	0.1	6.56531	-2.60961	-0.303532	Not Detected	Detected	CCTACCACACAAGCC	MIMAT0028392					0
mmu-miR-7213-3p	-5.01964	-2.32758	5.01964	down	0.1	6.76398	-2.60961	-0.282028	Not Detected	Detected	AGACTGGCTCTCTTGAG	MIMAT0028395					0
mmu-miR-7213-5p	1.63844	0.712327	1.63844	up	0.1	0.1	-2.60961	-3.32194	Not Detected	Not Detected	GCTACCTCAAGAGACC	MIMAT0028394					0
mmu-miR-7214-3p	21.5527	4.4298	21.5527	up	13.9766	14.4508	4.69537	0.265574	Detected	Detected	TGCGCTCAAGGGGT	MIMAT0028397					0
mmu-miR-7214-5p	1.63844	0.712327	1.63844	up	0.1	0.1	-2.60961	-3.32194	Not Detected	Not Detected	TTCTCATTCCAACCCAG	MIMAT0028396					0
mmu-miR-7215-3p	20.1274	4.33109	20.1274	up	6.95487	4.0718	3.68296	-0.648131	Detected	Detected	CCGCTTTTCTGCCT	MIMAT0028399					0
mmu-miR-7215-5p	1.63844	0.712327	1.63844	up	0.1	0.1	-2.60961	-3.32194	Not Detected	Not Detected	GTAGCTCAGCTTGGAC	MIMAT0028398					0
mmu-miR-7216-3p	1.63844	0.712327	1.63844	up	0.1	0.1	-2.60961	-3.32194	Not Detected	Not Detected	GCCGGAAAAGACCA	MIMAT0028401					0
mmu-miR-7216-5p	1.20435	0.268249	1.20435	up	102.78	287.252	7.57917	7.31092	Detected	Detected	TCTGGGTCCTCTGCC	MIMAT0028400					0
mmu-miR-7217-3p	-5.34598	-2.41845	5.34598	down	0.1	7.67204	-2.60961	-0.191159	Not Detected	Detected	TCTTCTTGCTTGTGGG	MIMAT0028403					0
mmu-miR-7217-5p	1.3232	0.404027	1.3232	up	17.8769	47.5154	5.07726	4.67323	Detected	Detected	CCTTCTGTCTCACAAGA	MIMAT0028402					0
mmu-miR-7218-3p	4.84523	2.27656	4.84523	up	100.014	70.3333	7.51035	5.23378	Detected	Detected	CCCCAGGCTAGAATG	MIMAT0028405					0
mmu-miR-7218-5p	9.60843	3.2643	9.60843	up	384.868	132.153	9.34947	6.08517	Detected	Detected	CCCTCTACACTAAACCC	MIMAT0028404					0
mmu-miR-7219-3p	1.63844	0.712327	1.63844	up	0.1	0.1	-2.60961	-3.32194	Not Detected	Not Detected	AGTGTGTTAGAAACCCG	MIMAT0028407					0
mmu-miR-7219-5p	-5.80609	-2.53757	5.80609	down	19.7005	410.442	5.20542	7.74298	Detected	Detected	TCTCAACCCTGAGCTC	MIMAT0028406					0
mmu-miR-7220-3p	1.63844	0.712327	1.63844	up	0.1	0.1	-2.60961	-3.32194	Not Detected	Not Detected	TCGGACTGAGACCTTG	MIMAT0028409					0
mmu-miR-7220-5p	1.63844	0.712327	1.63844	up	0.1	0.1	-2.60961	-3.32194	Not Detected	Not Detected	GCCAAGGTACCAAGAG	MIMAT0028408					0
mmu-miR-7221-3p	1.00885	0.0127134	1.00885	up	161.403	507.745	8.16494	8.15222	Detected	Detected	CCAGTCCCCAGCC	MIMAT0028411					0
mmu-miR-7221-5p	1.83802	0.878155	1.83802	up	40.0983	82.1607	6.30227	5.42411	Detected	Detected	CCCACCTGTGACCA	MIMAT0028410					0
mmu-miR-7222-3p	1.58125	0.661065	1.58125	up	383.124	745.261	9.34404	8.68298	Detected	Detected	CTGCTCCTGCCCA	MIMAT0028413					0
mmu-miR-7222-5p	1.63844	0.712327	1.63844	up	0.1	0.1	-2.60961	-3.32194	Not Detected	Not Detected	AGTCCAGCTCAGAGCC	MIMAT0028412					0
mmu-miR-7223-3p	1.63844	0.712327	1.63844	up	0.1	0.1	-2.60961	-3.32194	Not Detected	Not Detected	CCTAGCTTGTTCGAGA	MIMAT0028415					0
mmu-miR-7223-5p	-137.586	-7.10419	137.586	down	0.1	41.4057	-2.60961	4.49458	Not Detected	Detected	CCGACACCTCAGCA	MIMAT0028414					0
mmu-miR-7224-3p	3.91529	1.96912	3.91529	up	28.0961	25.0946	5.73687	3.76775	Detected	Detected	GTGGGTGGTCCTCT	MIMAT0028417					0
mmu-miR-7224-5p	-1.16038	-0.214599	1.16038	down	4.49301	21.4016	3.22133	3.43593	Detected	Detected	TCTTCACTGAGGGGC	MIMAT0028416					0
mmu-miR-7225-3p	1.63844	0.712327	1.63844	up	0.1	0.1	-2.60961	-3.32194	Not Detected	Not Detected	TGCTGCAGAGGCTGT	MIMAT0028419					0
mmu-miR-7225-5p	1.63844	0.712327	1.63844	up	0.1	0.1	-2.60961	-3.32194	Not Detected	Not Detected	GGCTTCTACACAGTCTA	MIMAT0028418					0
mmu-miR-7226-3p	-6.21297	-2.63528	6.21297	down	0.1	10.3623	-2.60961	0.0256721	Not Detected	Detected	CTGCTCAGAGAATGGC	MIMAT0028421					0
mmu-miR-7226-5p	2.50786	1.32646	2.50786	up	168.143	210.813	8.21012	6.88367	Detected	Detected	CCCTTCACACAATCAAC	MIMAT0028420					0
mmu-miR-7227-3p	7.79316	2.96221	7.79316	up	3.51909	9.86072	2.95209	-0.0101175	Detected	Detected	TCTGCCGATGACCC	MIMAT0028423					0
mmu-miR-7227-5p	1.63844	0.712327	1.63844	up	0.1	0.1	-2.60961	-3.32194	Not Detected	Not Detected	TCAATGAAAAAGTCATCAGA	MIMAT0028422					0
mmu-miR-7228-3p	1.63844	0.712327	1.63844	up	0.1	0.1	-2.60961	-3.32194	Not Detected	Not Detected	ACTGGAGACCGAACAC	MIMAT0028425					0
mmu-miR-7228-5p	1.63844	0.712327	1.63844	up	0.1	0.1	-2.60961	-3.32194	Not Detected	Not Detected	ACATCTGTTCAGGTCGC	MIMAT0028424					0
mmu-miR-7229-3p	1.63844	0.712327	1.63844	up	0.1	0.1	-2.60961	-3.32194	Not Detected	Not Detected	TGCAGAAAGTCACTGGT	MIMAT0028427					0
mmu-miR-7229-5p	1.63844	0.712327	1.63844	up	0.1	0.1	-2.60961	-3.32194	Not Detected	Not Detected	GCTATCCAGGGATGTC	MIMAT0028426					0
mmu-miR-7230-3p	1.63844	0.712327	1.63844	up	0.1	0.1	-2.60961	-3.32194	Not Detected	Not Detected	ACCTACTGACAGTCTCA	MIMAT0028429					0
mmu-miR-7230-5p	1.63844	0.712327	1.63844	up	0.1	0.1	-2.60961	-3.32194	Not Detected	Not Detected	GCCACTCAGAGAAACA	MIMAT0028428					0
mmu-miR-7231-3p	1.63844	0.712327	1.63844	up	0.1	0.1	-2.60961	-3.32194	Not Detected	Not Detected	TTCTGGGGAAACAAAGA	MIMAT0028431					0
mmu-miR-7231-5p	11276.4	13.461	11276.4	up	3382.79	4.06825	12.8123	-0.64876	Detected	Detected	GGTATGCCCCAGTGT	MIMAT0028430					0
mmu-miR-7232-3p	13.6863	3.77466	13.6863	up	7.29379	9.7508	3.75646	-0.0182037	Detected	Detected	GCCCCAAAGTCGAA	MIMAT0028433					0
mmu-miR-7232-5p	1.63844	0.712327	1.63844	up	0.1	0.1	-2.60961	-3.32194	Not Detected	Not Detected	CTTGGAAAAACAATCATCC	MIMAT0028432					0
mmu-miR-7233-3p	1.63844	0.712327	1.63844	up	0.1	0.1	-2.60961	-3.32194	Not Detected	Not Detected	GTAGACCTAAAGGCAGA	MIMAT0028435					0
mmu-miR-7233-5p	1.63844	0.712327	1.63844	up	0.1	0.1	-2.60961	-3.32194	Not Detected	Not Detected	CATCTATCTGTCCCTAACT	MIMAT0028434					0
mmu-miR-7234-3p	16.6933	4.06119	16.6933	up	11.0129	14.324	4.32041	0.259219	Detected	Detected	CCTTCTACCCTAGAAAGA	MIMAT0028437					0
mmu-miR-7234-5p	1.63844	0.712327	1.63844	up	0.1	0.1	-2.60961	-3.32194	Not Detected	Not Detected	AGAAACGTCTTTGGAGA	MIMAT0028436					0
mmu-miR-7235-3p	1.63844	0.712327	1.63844	up	0.1	0.1	-2.60961	-3.32194	Not Detected	Not Detected	GAGGAGAGAAGCAAGAA	MIMAT0028439					0
mmu-miR-7235-5p	1.33908	0.421244	1.33908	up	270.871	652.468	8.91095	8.4897	Detected	Detected	GCCCAGACCCCTC	MIMAT0028438					0
mmu-miR-7236-3p	1.63844	0.712327	1.63844	up	0.1	0.1	-2.60961	-3.32194	Not Detected	Not Detected	GGTCTAAATCTGTGCGG	MIMAT0028441					0
mmu-miR-7236-5p	1.63844	0.712327	1.63844	up	0.1	0.1	-2.60961	-3.32194	Not Detected	Not Detected	GGCATTGGACCACAC	MIMAT0028440					0
mmu-miR-7237-3p	1.63844	0.712327	1.63844	up	0.1	0.1	-2.60961	-3.32194	Not Detected	Not Detected	GCTCGGTAAGCTCAA	MIMAT0028443					0
mmu-miR-7237-5p	209.588	7.71141	209.588	up	129.126	13.8767	7.94774	0.236332	Detected	Detected	GCCAGTCCTGTCACA	MIMAT0028442					0
mmu-miR-7238-3p	1.63844	0.712327	1.63844	up	0.1	0.1	-2.60961	-3.32194	Not Detected	Not Detected	GAACACAAAGGACAG	MIMAT0028445					0
mmu-miR-7238-5p	4.91709	2.2978	4.91709	up	31.6697	22.9767	5.91658	3.61878	Detected	Detected	GCCGCGTCCCAT	MIMAT0028444					0
mmu-miR-7239-3p	-85.7333	-6.42178	85.7333	down	0.1	25.8723	-2.60961	3.81217	Not Detected	Detected	CTACCTGCCTGACAGA	MIMAT0028447					0
mmu-miR-7239-5p	1.63844	0.712327	1.63844	up	0.1	0.1	-2.60961	-3.32194	Not Detected	Not Detected	AAGGGCTTTGTCAGGA	MIMAT0028446					0
mmu-miR-7240-3p	1.63844	0.712327	1.63844	up	0.1	0.1	-2.60961	-3.32194	Not Detected	Not Detected	TGTTGGAGAGGACCAA	MIMAT0028449					0
mmu-miR-7240-5p	1.63844	0.712327	1.63844	up	0.1	0.1	-2.60961	-3.32194	Not Detected	Not Detected	TCCGACGGCGGT	MIMAT0028448					0
mmu-miR-7241-3p	2.39515	1.26012	2.39515	up	243.223	338.414	8.78965	7.52953	Detected	Detected	GCTCTCCCATGAGTATC	MIMAT0028451					0
mmu-miR-7241-5p	2.55885	1.3555	2.55885	up	13.8723	20.664	4.68467	3.32917	Detected	Detected	GGTGGGTATTAACTCATG	MIMAT0028450					0
mmu-miR-7242-3p	1.63844	0.712327	1.63844	up	0.1	0.1	-2.60961	-3.32194	Not Detected	Not Detected	CCAGAGTAGAGCCGA	MIMAT0028453					0
mmu-miR-7242-5p	1.31068	0.390315	1.31068	up	9.4219	23.8113	4.08172	3.69141	Detected	Detected	ACAAGCACCTCCCAA	MIMAT0028452					0
mmu-miR-7243-3p	1.63844	0.712327	1.63844	up	0.1	0.1	-2.60961	-3.32194	Not Detected	Not Detected	ACTGCTGTCAGCTGTT	MIMAT0029911					0
mmu-miR-7243-5p	1.63844	0.712327	1.63844	up	0.1	0.1	-2.60961	-3.32194	Not Detected	Not Detected	ACTCAGAACAGCTGACA	MIMAT0029910					0
mmu-miR-741-3p	-56.037	-5.80831	56.037	down	0.1	19.1636	-2.60961	3.1987	Not Detected	Detected	TCTACATAGAATGGCATCTC	MIMAT0004236	chrX	64050046	64050028	+	0
mmu-miR-741-5p	1.63844	0.712327	1.63844	up	0.1	0.1	-2.60961	-3.32194	Not Detected	Not Detected	CATGATAGGTACCAATCTAC	MIMAT0017262	chrX	64050008	64049990	+	0
mmu-miR-742-3p	1.63844	0.712327	1.63844	up	0.1	0.1	-2.60961	-3.32194	Not Detected	Not Detected	TTTACCCAGCATGGTG	MIMAT0004237	chrX	64033609	64033595	+	0
mmu-miR-742-5p	1.63844	0.712327	1.63844	up	0.1	0.1	-2.60961	-3.32194	Not Detected	Not Detected	TGATTAGCAACCATGTGAGT	MIMAT0004838	chrX	64033573	64033555	+	0
mmu-miR-743a-3p	-6.55452	-2.71249	6.55452	down	0.1	11.5329	-2.60961	0.102878	Not Detected	Detected	TCTACTCAGCTTGGTG	MIMAT0004238	chrX	64029990	64029976	+	0
mmu-miR-743a-5p	1.63844	0.712327	1.63844	up	0.1	0.1	-2.60961	-3.32194	Not Detected	Not Detected	ATGACAGGCACCAATCT	MIMAT0017263	chrX	64029956	64029941	+	0
mmu-miR-743b-3p	-4.41688	-2.14303	4.41688	down	0.1	5.23708	-2.60961	-0.466583	Not Detected	Detected	TCTATTCAGCATGATGTCT	MIMAT0004840					0
mmu-miR-743b-5p	1.63844	0.712327	1.63844	up	0.1	0.1	-2.60961	-3.32194	Not Detected	Not Detected	TGATGGACACCAGTCTG	MIMAT0004839					0
mmu-miR-744-3p	-4.71629	-2.23765	4.71629	down	0.1	5.97116	-2.60961	-0.371958	Not Detected	Detected	AGGTTGAGGTTAGTGGCA	MIMAT0004820	chr11	65548325	65548309	+	0
mmu-miR-744-5p	2.90146	1.53678	2.90146	up	20.675	24.8409	5.27513	3.73835	Detected	Detected	TGCTGTTAGCCCTA	MIMAT0004187	chr11	65548268	65548256	+	0
mmu-miR-7578	1.63844	0.712327	1.63844	up	0.1	0.1	-2.60961	-3.32194	Not Detected	Not Detected	TCTGAGGCAGAAGACA	MIMAT0029578					0
mmu-miR-758-3p	1.63844	0.712327	1.63844	up	0.1	0.1	-2.60961	-3.32194	Not Detected	Not Detected	TAGTGGACCAGGTCA	MIMAT0003889	chr12	110951073	110951086	-	0
mmu-miR-758-5p	37.1467	5.21516	37.1467	up	16.3008	6.85899	4.9432	-0.271966	Detected	Detected	CGTGTGCTCTCTGG	MIMAT0017235	chr12	110951041	110951053	-	0
mmu-miR-759	1.63844	0.712327	1.63844	up	0.1	0.1	-2.60961	-3.32194	Not Detected	Not Detected	GTCAAAATTGTTTGCACTCTG	MIMAT0003897					0
mmu-miR-760-3p	3.36742	1.75165	3.36742	up	112.751	122.159	7.75	5.99836	Detected	Detected	TCCCCACAGACCCA	MIMAT0003898	chr3	121996591	121996579	+	0
mmu-miR-760-5p	12.8518	3.6839	12.8518	up	80.5682	22.111	7.22022	3.53632	Detected	Detected	CCGGGCTCTGGTG	MIMAT0017245					0
mmu-miR-761	1.63844	0.712327	1.63844	up	0.1	0.1	-2.60961	-3.32194	Not Detected	Not Detected	TGTGTCAGTTTCACCCT	MIMAT0003893					0
mmu-miR-762	1.4613	0.54725	1.4613	up	107.484	260.038	7.67108	7.12383	Detected	Detected	GCTCTGTCCCGGC	MIMAT0003892					0
mmu-miR-763	-2.59236	-1.37426	2.59236	down	0.1	1.80404	-2.60961	-1.23535	Not Detected	Detected	GCCACTGGTTCTTC	MIMAT0003896					0
mmu-miR-764-3p	1.63844	0.712327	1.63844	up	0.1	0.1	-2.60961	-3.32194	Not Detected	Not Detected	ACAGTTGCCACTATGGCC	MIMAT0003895					0
mmu-miR-764-5p	1.63844	0.712327	1.63844	up	0.1	0.1	-2.60961	-3.32194	Not Detected	Not Detected	AGGAGGACATGTGAGCAC	MIMAT0003894					0
mmu-miR-7646-3p	1.63844	0.712327	1.63844	up	0.1	0.1	-2.60961	-3.32194	Not Detected	Not Detected	GTGAAAGAGAGCGACC	MIMAT0029795					0
mmu-miR-7646-5p	1.63844	0.712327	1.63844	up	0.1	0.1	-2.60961	-3.32194	Not Detected	Not Detected	CAGCACTGATCAGTTCT	MIMAT0029794					0
mmu-miR-7647-3p	1.31281	0.392659	1.31281	up	159.397	413.201	8.15222	7.75956	Detected	Detected	GTACTACCACCTCCTGG	MIMAT0029797					0
mmu-miR-7647-5p	1.63844	0.712327	1.63844	up	0.1	0.1	-2.60961	-3.32194	Not Detected	Not Detected	AAAAGGCCAGGAGGT	MIMAT0029796					0
mmu-miR-7648-3p	20.2626	4.34075	20.2626	up	853.847	131.156	10.4108	6.07003	Detected	Detected	CCGCGTCCCGG	MIMAT0029799					0
mmu-miR-7648-5p	12.1026	3.59724	12.1026	up	5.35416	7.78874	3.41697	-0.180269	Detected	Detected	GCGCCGAGCCC	MIMAT0029798					0
mmu-miR-7649-3p	1.63844	0.712327	1.63844	up	0.1	0.1	-2.60961	-3.32194	Not Detected	Not Detected	AGAAACAAGCAGTGCTG	MIMAT0029801					0
mmu-miR-7649-5p	-238.802	-7.89967	238.802	down	0.1	73.1863	-2.60961	5.29006	Not Detected	Detected	CATGTCTACAGCACTGC	MIMAT0029800					0
mmu-miR-7650-3p	207.716	7.69847	207.716	up	11.3373	0.1	4.37653	-3.32194	Detected	Not Detected	TCCTTCTTGTATATATCAAAAC	MIMAT0029803					0
mmu-miR-7650-5p	1.63844	0.712327	1.63844	up	0.1	0.1	-2.60961	-3.32194	Not Detected	Not Detected	AGTTCTGGGTTGCAAG	MIMAT0029802					0
mmu-miR-7651-3p	1.63844	0.712327	1.63844	up	0.1	0.1	-2.60961	-3.32194	Not Detected	Not Detected	TCAAGGGGAAAAAAACC	MIMAT0029805					0
mmu-miR-7651-5p	-3.99842	-1.99943	3.99842	down	0.1	4.29175	-2.60961	-0.610181	Not Detected	Detected	ATCTCAGGCTGGCTTT	MIMAT0029804					0
mmu-miR-7652-3p	1.63844	0.712327	1.63844	up	0.1	0.1	-2.60961	-3.32194	Not Detected	Not Detected	AGAAGCCACAGGAAAGC	MIMAT0029811					0
mmu-miR-7652-5p	1.63844	0.712327	1.63844	up	0.1	0.1	-2.60961	-3.32194	Not Detected	Not Detected	GCCTGAAATCCCTGT	MIMAT0029810					0
mmu-miR-7653-3p	1.7863	0.836977	1.7863	up	15.4829	28.9327	4.84473	4.00775	Detected	Detected	AGGCGGGGTGGAA	MIMAT0029813					0
mmu-miR-7653-5p	1.44158	0.527648	1.44158	up	110.899	273.597	7.73053	7.20288	Detected	Detected	CCGTCTGTCTGTCC	MIMAT0029812					0
mmu-miR-7654-3p	276.52	8.11124	276.52	up	14.841	0.1	4.7893	-3.32194	Detected	Not Detected	GGACGAGGCGCG	MIMAT0029815					0
mmu-miR-7654-5p	98.5919	6.6234	98.5919	up	4.86239	0.1	3.30146	-3.32194	Detected	Not Detected	GCGCGAGCGGG	MIMAT0029814					0
mmu-miR-7655-3p	1.63844	0.712327	1.63844	up	0.1	0.1	-2.60961	-3.32194	Not Detected	Not Detected	CAGGCCCACGGA	MIMAT0029817					0
mmu-miR-7655-5p	1.63844	0.712327	1.63844	up	0.1	0.1	-2.60961	-3.32194	Not Detected	Not Detected	TCTTTAGGAGCTCCGT	MIMAT0029816					0
mmu-miR-7656-3p	1.63844	0.712327	1.63844	up	0.1	0.1	-2.60961	-3.32194	Not Detected	Not Detected	ACCGTGGGATCAGAC	MIMAT0029819					0
mmu-miR-7656-5p	1.63844	0.712327	1.63844	up	0.1	0.1	-2.60961	-3.32194	Not Detected	Not Detected	TAACAGGCTATCTGATCCC	MIMAT0029818					0
mmu-miR-7657-3p	1.63844	0.712327	1.63844	up	0.1	0.1	-2.60961	-3.32194	Not Detected	Not Detected	ACCAAGTTGGGAATAGC	MIMAT0029821					0
mmu-miR-7657-5p	1.63844	0.712327	1.63844	up	0.1	0.1	-2.60961	-3.32194	Not Detected	Not Detected	TTACCTAACTATCCAACTATT	MIMAT0029820					0
mmu-miR-7658-3p	-5.70754	-2.51287	5.70754	down	0.1	8.7449	-2.60961	-0.0967431	Not Detected	Detected	AGCGTGGGTGAGGA	MIMAT0029823					0
mmu-miR-7658-5p	-3.513	-1.8127	3.513	down	11.3729	142.332	4.38264	6.19535	Detected	Detected	CCAGCACCGCCA	MIMAT0029822					0
mmu-miR-7659-3p	1.63844	0.712327	1.63844	up	0.1	0.1	-2.60961	-3.32194	Not Detected	Not Detected	CATGAACCGACAAGC	MIMAT0029825					0
mmu-miR-7659-5p	1.63844	0.712327	1.63844	up	0.1	0.1	-2.60961	-3.32194	Not Detected	Not Detected	CAGGAATCTGGAGCC	MIMAT0029824					0
mmu-miR-7660-3p	-2.43025	-1.28111	2.43025	down	4.88817	44.8477	3.32917	4.61028	Detected	Detected	TACTTTGCCCATCACTTA	MIMAT0029827					0
mmu-miR-7660-5p	1.63844	0.712327	1.63844	up	0.1	0.1	-2.60961	-3.32194	Not Detected	Not Detected	CGAGATCTGAAGCCAG	MIMAT0029826					0
mmu-miR-7661-3p	1.63844	0.712327	1.63844	up	0.1	0.1	-2.60961	-3.32194	Not Detected	Not Detected	GCAGAGAGAAACTGGG	MIMAT0029829					0
mmu-miR-7661-5p	1.63844	0.712327	1.63844	up	0.1	0.1	-2.60961	-3.32194	Not Detected	Not Detected	ACTTTAAACTCCAGGTTTC	MIMAT0029828					0
mmu-miR-7662-3p	1.63844	0.712327	1.63844	up	0.1	0.1	-2.60961	-3.32194	Not Detected	Not Detected	GCAAGGCTGATCCG	MIMAT0029831					0
mmu-miR-7662-5p	1.63844	0.712327	1.63844	up	0.1	0.1	-2.60961	-3.32194	Not Detected	Not Detected	GCTGGATCCAGGCC	MIMAT0029830					0
mmu-miR-7663-3p	1.63844	0.712327	1.63844	up	0.1	0.1	-2.60961	-3.32194	Not Detected	Not Detected	GGAGCTCCTTATGATCC	MIMAT0029833					0
mmu-miR-7663-5p	1.63844	0.712327	1.63844	up	0.1	0.1	-2.60961	-3.32194	Not Detected	Not Detected	ACAGTGGATGATCACCA	MIMAT0029832					0
mmu-miR-7664-3p	1.63844	0.712327	1.63844	up	0.1	0.1	-2.60961	-3.32194	Not Detected	Not Detected	ATTAGTTAACCCAGCCTAA	MIMAT0029835					0
mmu-miR-7664-5p	1.63844	0.712327	1.63844	up	0.1	0.1	-2.60961	-3.32194	Not Detected	Not Detected	ATCTCATAGACAGGTAAACT	MIMAT0029834					0
mmu-miR-7665-3p	6.23249	2.63981	6.23249	up	2.96131	12.2186	2.78435	0.144541	Detected	Detected	TGTAGGGGACAGGGA	MIMAT0029837					0
mmu-miR-7665-5p	1.61117	0.688108	1.61117	up	18.5899	39.9208	5.13139	4.44328	Detected	Detected	CAGCCTTTCTCCTGC	MIMAT0029836					0
mmu-miR-7666-3p	2.34921	1.23218	2.34921	up	88.0373	132.6	7.32083	6.08865	Detected	Detected	CTCGCCCGTGCG	MIMAT0029839					0
mmu-miR-7666-5p	1.41434	0.500132	1.41434	up	19.428	47.7696	5.18801	4.68788	Detected	Detected	GGGGAAGCACCGC	MIMAT0029838					0
mmu-miR-7667-3p	-4.85258	-2.27875	4.85258	down	0.1	6.32124	-2.60961	-0.33086	Not Detected	Detected	CAGTGCCATCTCTGC	MIMAT0029841					0
mmu-miR-7667-5p	-32.3622	-5.01624	32.3622	down	0.1	15.2533	-2.60961	2.40663	Not Detected	Detected	TCAGGGGCTAGAGAGA	MIMAT0029840					0
mmu-miR-7668-3p	1.72772	0.788867	1.72772	up	64.764	129.328	6.84626	6.0574	Detected	Detected	CTCCTCTGAATCCCC	MIMAT0029843					0
mmu-miR-7668-5p	1.63844	0.712327	1.63844	up	0.1	0.1	-2.60961	-3.32194	Not Detected	Not Detected	ACAGAGAGCAGGTTATTC	MIMAT0029842					0
mmu-miR-7669-3p	-64.7876	-6.01764	64.7876	down	0.1	21.1816	-2.60961	3.40803	Not Detected	Detected	GCATGTGCCACCAC	MIMAT0029845					0
mmu-miR-7669-5p	1.63844	0.712327	1.63844	up	0.1	0.1	-2.60961	-3.32194	Not Detected	Not Detected	CAAAAGCTGTGTATGGT	MIMAT0029844					0
mmu-miR-767	-6.70119	-2.74442	6.70119	down	0.1	12.0548	-2.60961	0.134806	Not Detected	Detected	TGCTCAGACAACCATGG	MIMAT0012773					0
mmu-miR-7670-3p	1.63844	0.712327	1.63844	up	0.1	0.1	-2.60961	-3.32194	Not Detected	Not Detected	TCTACAGATATTCAGAAAGGG	MIMAT0029847					0
mmu-miR-7670-5p	-3.65884	-1.87139	3.65884	down	0.1	3.59372	-2.60961	-0.738225	Not Detected	Detected	TTCCCAATCTGCCCA	MIMAT0029846					0
mmu-miR-7671-3p	1.68161	0.749846	1.68161	up	67.0329	137.867	6.89803	6.14818	Detected	Detected	GTGGTTCTCCGCCT	MIMAT0029849					0
mmu-miR-7671-5p	1.63844	0.712327	1.63844	up	0.1	0.1	-2.60961	-3.32194	Not Detected	Not Detected	GGAAGCTAGCCAGAGC	MIMAT0029848					0
mmu-miR-7672-3p	1.63844	0.712327	1.63844	up	0.1	0.1	-2.60961	-3.32194	Not Detected	Not Detected	CCACATGAACCTGGC	MIMAT0029851					0
mmu-miR-7672-5p	1.12605	0.171265	1.12605	up	46.5235	155.849	6.48656	6.3153	Detected	Detected	TCGCCCGCTGTCA	MIMAT0029850					0
mmu-miR-7673-3p	159.934	7.32134	159.934	up	8.87537	0.1	3.9994	-3.32194	Detected	Not Detected	TCCTTTGACGGTGAGG	MIMAT0029853					0
mmu-miR-7673-5p	-5.63575	-2.49461	5.63575	down	0.1	8.52631	-2.60961	-0.115003	Not Detected	Detected	CATTCCTTACCTCTCAGT	MIMAT0029852					0
mmu-miR-7674-3p	1.63844	0.712327	1.63844	up	0.1	0.1	-2.60961	-3.32194	Not Detected	Not Detected	CTGGGTGCGGTGA	MIMAT0029857					0
mmu-miR-7674-5p	-1.43962	-0.525683	1.43962	down	8.29733	40.0701	3.92237	4.44805	Detected	Detected	AGTCCTCATGCTGCC	MIMAT0029856					0
mmu-miR-7675-3p	1.63844	0.712327	1.63844	up	0.1	0.1	-2.60961	-3.32194	Not Detected	Not Detected	GAGTCACGAACAAATGA	MIMAT0029859					0
mmu-miR-7675-5p	1.63844	0.712327	1.63844	up	0.1	0.1	-2.60961	-3.32194	Not Detected	Not Detected	TTGCTCTTCATTCTTTCG	MIMAT0029858					0
mmu-miR-7676-3p	-3.54872	-1.8273	3.54872	down	0.1	3.38066	-2.60961	-0.782312	Not Detected	Detected	TGTGGGCAGAGTGAG	MIMAT0029861					0
mmu-miR-7676-5p	1.63844	0.712327	1.63844	up	0.1	0.1	-2.60961	-3.32194	Not Detected	Not Detected	ATCAGAGGCCATCATACT	MIMAT0029860					0
mmu-miR-7677-3p	1.63844	0.712327	1.63844	up	0.1	0.1	-2.60961	-3.32194	Not Detected	Not Detected	CCTAGGTGAGAGGACA	MIMAT0029869					0
mmu-miR-7677-5p	81.6352	6.35112	81.6352	up	45.0051	11.3757	6.4441	0.0929772	Detected	Detected	CCGCGGCTGCTT	MIMAT0029868					0
mmu-miR-7678-3p	1.63844	0.712327	1.63844	up	0.1	0.1	-2.60961	-3.32194	Not Detected	Not Detected	GCTACAAGAGAAAGTAAGG	MIMAT0029871					0
mmu-miR-7678-5p	2.0236	1.01692	2.0236	up	4.58977	14.8748	3.24978	2.23286	Detected	Detected	ATTCCTATCCAGCCCTT	MIMAT0029870					0
mmu-miR-7679-3p	1.63844	0.712327	1.63844	up	0.1	0.1	-2.60961	-3.32194	Not Detected	Not Detected	GCTGGTTGGTACCC	MIMAT0029873					0
mmu-miR-7679-5p	-3.84193	-1.94183	3.84193	down	0.1	3.96237	-2.60961	-0.667782	Not Detected	Detected	AGGGATCCTGGTGCC	MIMAT0029872					0
mmu-miR-7680-3p	1.63844	0.712327	1.63844	up	0.1	0.1	-2.60961	-3.32194	Not Detected	Not Detected	CCTATTCCAGTGAACAAG	MIMAT0029875					0
mmu-miR-7680-5p	-236.945	-7.88841	236.945	down	0.1	72.6038	-2.60961	5.2788	Not Detected	Detected	AACTGCTTGTTCACTGG	MIMAT0029874					0
mmu-miR-7681-3p	-127.071	-6.98949	127.071	down	0.1	38.1545	-2.60961	4.37987	Not Detected	Detected	CTATCCTGTCAGTGCC	MIMAT0029883					0
mmu-miR-7681-5p	1.63844	0.712327	1.63844	up	0.1	0.1	-2.60961	-3.32194	Not Detected	Not Detected	AGAGAGGGCAAGGAC	MIMAT0029882					0
mmu-miR-7682-3p	-1552.47	-10.6003	1552.47	down	0.1	482.828	-2.60961	7.99074	Not Detected	Detected	AAAGCCAACCCAACC	MIMAT0029885					0
mmu-miR-7682-5p	1.63844	0.712327	1.63844	up	0.1	0.1	-2.60961	-3.32194	Not Detected	Not Detected	GTTTCTGTGGCAAGAG	MIMAT0029884					0
mmu-miR-7683-3p	-1.17604	-0.233936	1.17604	down	9.14024	34.7084	4.04175	4.27569	Detected	Detected	GTTCCGTGTTCCACC	MIMAT0029887					0
mmu-miR-7683-5p	1.63844	0.712327	1.63844	up	0.1	0.1	-2.60961	-3.32194	Not Detected	Not Detected	AGTGGTCAGACGAAAC	MIMAT0029886					0
mmu-miR-7684-3p	-697.873	-9.44682	697.873	down	0.1	202.92	-2.60961	6.83721	Not Detected	Detected	CACAGGCCAGCCC	MIMAT0029891					0
mmu-miR-7684-5p	4.44431	2.15196	4.44431	up	151.411	118.561	8.10825	5.95629	Detected	Detected	CTGCTGCCCAGGC	MIMAT0029890					0
mmu-miR-7685-3p	3.59638	1.84654	3.59638	up	13.4893	15.9941	4.62729	2.78075	Detected	Detected	CTCCAGCCGGAAGC	MIMAT0029897					0
mmu-miR-7685-5p	1.63844	0.712327	1.63844	up	0.1	0.1	-2.60961	-3.32194	Not Detected	Not Detected	GGAGACTTGAAGAAACC	MIMAT0029896					0
mmu-miR-7686-3p	1.23409	0.303446	1.23409	up	18.4582	52.5366	5.11998	4.81654	Detected	Detected	TCTCTTACAGTGCCCC	MIMAT0029899					0
mmu-miR-7686-5p	1.78618	0.836879	1.78618	up	868.707	1251.74	10.4322	9.59536	Detected	Detected	GCCCAGCCCCAG	MIMAT0029898					0
mmu-miR-7687-3p	2.70768	1.43706	2.70768	up	34.4141	45.4844	6.07003	4.63298	Detected	Detected	TGTGGCGGGGCG	MIMAT0029903					0
mmu-miR-7687-5p	3.0926	1.62882	3.0926	up	96.3869	106.067	7.44377	5.81495	Detected	Detected	AGCCTGCGCCTCA	MIMAT0029902					0
mmu-miR-7688-3p	1.63844	0.712327	1.63844	up	0.1	0.1	-2.60961	-3.32194	Not Detected	Not Detected	GAAAGCTAGGCATAAGC	MIMAT0029907					0
mmu-miR-7688-5p	1.63844	0.712327	1.63844	up	0.1	0.1	-2.60961	-3.32194	Not Detected	Not Detected	GCTCATCAGATCATGCC	MIMAT0029906					0
mmu-miR-7689-3p	1.63844	0.712327	1.63844	up	0.1	0.1	-2.60961	-3.32194	Not Detected	Not Detected	AAACCCAGGCAGTCTG	MIMAT0029909					0
mmu-miR-7689-5p	1.63844	0.712327	1.63844	up	0.1	0.1	-2.60961	-3.32194	Not Detected	Not Detected	CTAAGCCAGGCTGCC	MIMAT0029908					0
mmu-miR-770-3p	2.12709	1.08888	2.12709	up	64.4296	101.799	6.83721	5.74833	Detected	Detected	CCAGCTCCACGTC	MIMAT0003891					0
mmu-miR-770-5p	75.6915	6.24206	75.6915	up	15.8142	1.50771	4.87728	-1.36478	Detected	Detected	CGTGGCCCAGACA	MIMAT0004822					0
mmu-miR-7a-1-3p	-3.63745	-1.86293	3.63745	down	6.07033	80.8863	3.53415	5.39707	Detected	Detected	TATGGCAGACTGTGATTTG	MIMAT0004670	chr13	58494226	58494208	+	0
mmu-miR-7a-2-3p	1.63844	0.712327	1.63844	up	0.1	0.1	-2.60961	-3.32194	Not Detected	Not Detected	TGTGGCAGACTGGGA	MIMAT0017070	chr7	86033229	86033242	-	0
mmu-miR-7a-5p	-16.0495	-4.00445	16.0495	down	97.6063	5135.53	7.46715	11.4716	Detected	Detected	ACAACAAAATCACTAGTCTTCC	MIMAT0000677	chr7	86033182	86033203	-	0
mmu-miR-7b-3p	-6.38023	-2.67361	6.38023	down	0.1	10.9277	-2.60961	0.0639969	Not Detected	Detected	TGAGGCTGGCTGTGA	MIMAT0017071	chr17	56382486	56382499	-	0
mmu-miR-7b-5p	-452.789	-8.8227	452.789	down	0.1	142.811	-2.60961	6.21309	Not Detected	Detected	ACAACAAAATCACAAGTCTTCCA	MIMAT0000678	chr17	56382441	56382462	-	0
mmu-miR-802-3p	1.63844	0.712327	1.63844	up	0.1	0.1	-2.60961	-3.32194	Not Detected	Not Detected	CTGAGTGACAAAGACTC	MIMAT0017240	chr16	93370026	93370041	-	0
mmu-miR-802-5p	173.103	7.43549	173.103	up	9.70613	0.1	4.11355	-3.32194	Detected	Not Detected	AAGGATGAATCTTTGTTACTGA	MIMAT0004188	chr16	93369983	93370003	-	0
mmu-miR-804	69.1179	6.11099	69.1179	up	33.7095	8.85198	6.02302	-0.0879639	Detected	Detected	TCCAGGTGAGGAACAACT	MIMAT0004210					0
mmu-miR-8090	-7.57358	-2.92098	7.57358	down	39.0831	972.785	6.2449	9.16588	Detected	Detected	ACAGACCTCCACTGC	MIMAT0031391					0
mmu-miR-8091	-4.1372	-2.04866	4.1372	down	0.1	4.59484	-2.60961	-0.560957	Not Detected	Detected	CACCAGCTTACCACTC	MIMAT0031392					0
mmu-miR-8092	-2.53275	-1.34071	2.53275	down	2.99612	31.414	2.79462	4.13532	Detected	Detected	TGCCTGCGAGTCCC	MIMAT0031393					0
mmu-miR-8093	-80.6097	-6.33288	80.6097	down	0.1	24.4008	-2.60961	3.72327	Not Detected	Detected	CACTCATGCTCTGCTC	MIMAT0031394					0
mmu-miR-8094	1.25815	0.331307	1.25815	up	48.7288	142.798	6.54123	6.20993	Detected	Detected	TCTTCTCGTTGTCCTTC	MIMAT0031395					0
mmu-miR-8095	1.44605	0.53212	1.44605	up	12.5406	28.7484	4.52761	3.99549	Detected	Detected	GGGACAGACAGCAGA	MIMAT0031396					0
mmu-miR-8096	1.63844	0.712327	1.63844	up	0.1	0.1	-2.60961	-3.32194	Not Detected	Not Detected	ACTCTTCAGCTACCGTG	MIMAT0031398					0
mmu-miR-8097	1.96716	0.976113	1.96716	up	22.1154	39.75	5.41312	4.437	Detected	Detected	CAGCCCGGACATTT	MIMAT0031399					0
mmu-miR-8098	113.72	6.82935	113.72	up	5.92239	0.1	3.50741	-3.32194	Detected	Not Detected	TTGGGAGCCAGCGA	MIMAT0031400					0
mmu-miR-8099	-1.11133	-0.152292	1.11133	down	130.963	506.425	7.96533	8.11762	Detected	Detected	ACAACCTTTCCCACGC	MIMAT0031401					0
mmu-miR-8100	4.99447	2.32033	4.99447	up	277.623	185.247	8.94484	6.62451	Detected	Detected	ACCTGCTTGCTCCC	MIMAT0031403					0
mmu-miR-8101	2.27286	1.18451	2.27286	up	784.726	926.215	10.2454	9.06085	Detected	Detected	GGCTCCTCCGGC	MIMAT0031405					0
mmu-miR-8102	1.03734	0.0528841	1.03734	up	434.767	1183.98	9.51672	9.46384	Detected	Detected	TCTTCCTCGTTCCCC	MIMAT0031406					0
mmu-miR-8103	1.70767	0.772026	1.70767	up	11.8033	23.5282	4.437	3.66498	Detected	Detected	GGGAGAACAGAGAACA	MIMAT0031407					0
mmu-miR-8104	-49.2614	-5.62239	49.2614	down	0.1	17.6386	-2.60961	3.01278	Not Detected	Detected	CGCTGCACTCCACC	MIMAT0031408					0
mmu-miR-8105	1.29862	0.376984	1.29862	up	31.9613	91.0304	5.93438	5.5574	Detected	Detected	CTTCGGGTCTCGC	MIMAT0031409					0
mmu-miR-8106	1.63844	0.712327	1.63844	up	0.1	0.1	-2.60961	-3.32194	Not Detected	Not Detected	ATAAATGCCATGTACAGAGT	MIMAT0031411					0
mmu-miR-8107	-1.31143	-0.391146	1.31143	down	31.6977	156.338	5.92641	6.31756	Detected	Detected	TGTCCCAGCCACTAGT	MIMAT0031412					0
mmu-miR-8108	3.1913	1.67414	3.1913	up	38.373	42.5279	6.20993	4.53578	Detected	Detected	TGTAACTACGCTCCTCC	MIMAT0031413					0
mmu-miR-8109	5.79953	2.53593	5.79953	up	227.04	138.968	8.69627	6.16033	Detected	Detected	CCCGCGGCCG	MIMAT0031415					0
mmu-miR-8110	3.12379	1.6433	3.12379	up	12651.5	20149.2	14.8136	13.1703	Detected	Detected	CCCCCCCCCCA	MIMAT0031416					0
mmu-miR-8111	1.63844	0.712327	1.63844	up	0.1	0.1	-2.60961	-3.32194	Not Detected	Not Detected	GTGTACACTACCATGCC	MIMAT0031417					0
mmu-miR-8112	11.7433	3.55377	11.7433	up	7.20606	12.9888	3.7424	0.188634	Detected	Detected	TGCGGTGGAGGTGG	MIMAT0031418					0
mmu-miR-8113	-1.82333	-0.866575	1.82333	down	31.0019	193.847	5.87809	6.74467	Detected	Detected	CTACTTGCCCCTGAC	MIMAT0031419					0
mmu-miR-8114	1.63844	0.712327	1.63844	up	0.1	0.1	-2.60961	-3.32194	Not Detected	Not Detected	AGGCGGAGAGGAGA	MIMAT0031420					0
mmu-miR-8115	1.63844	0.712327	1.63844	up	0.1	0.1	-2.60961	-3.32194	Not Detected	Not Detected	AGAGCCCTTGTTGCTA	MIMAT0031421					0
mmu-miR-8116	15.8964	3.99063	15.8964	up	8.05098	8.48241	3.8719	-0.118727	Detected	Detected	GCCAACTAGCCCCG	MIMAT0031422					0
mmu-miR-8117	-1.64588	-0.718859	1.64588	down	1543.21	8550.79	11.4558	12.1746	Detected	Detected	CCCCTTCTGTTCCAC	MIMAT0031423					0
mmu-miR-8118	1.63844	0.712327	1.63844	up	0.1	0.1	-2.60961	-3.32194	Not Detected	Not Detected	TGTCAGCATAGTCATGTTT	MIMAT0031424					0
mmu-miR-8119	2.91238	1.5422	2.91238	up	54.2896	65.683	6.66549	5.12329	Detected	Detected	GACCCTAGCTCCCTC	MIMAT0031425					0
mmu-miR-8120	1.63844	0.712327	1.63844	up	0.1	0.1	-2.60961	-3.32194	Not Detected	Not Detected	GGCTCGGAAGTTGC	MIMAT0031426					0
mmu-miR-871-3p	1.63844	0.712327	1.63844	up	0.1	0.1	-2.60961	-3.32194	Not Detected	Not Detected	ATTATCCAGAATGGTGCC	MIMAT0017265					0
mmu-miR-871-5p	7.12285	2.83245	7.12285	up	44.8726	22.8015	6.43974	3.60729	Detected	Detected	CATGACTGGCACTAATCTG	MIMAT0004841	chrX	64063635	64063618	+	0
mmu-miR-872-3p	-5.78773	-2.533	5.78773	down	0.1	8.99236	-2.60961	-0.0766141	Not Detected	Detected	AGGAGGCTACTGCAATA	MIMAT0004935	chr4	94331903	94331918	-	0
mmu-miR-872-5p	-3.36424	-1.75028	3.36424	down	33.7402	417.659	6.04352	7.7938	Detected	Detected	CCTGAACTAACAAGTAACCT	MIMAT0004934	chr4	94331860	94331878	-	0
mmu-miR-873a-3p	1.63844	0.712327	1.63844	up	0.1	0.1	-2.60961	-3.32194	Not Detected	Not Detected	TCCCGGGAACTTGTC	MIMAT0017279	chr4	36615609	36615595	+	0
mmu-miR-873a-5p	1.63844	0.712327	1.63844	up	0.1	0.1	-2.60961	-3.32194	Not Detected	Not Detected	AGGAGACTCACAAGTTCCTG	MIMAT0004936	chr4	36615573	36615554	+	0
mmu-miR-873b	1.63844	0.712327	1.63844	up	0.1	0.1	-2.60961	-3.32194	Not Detected	Not Detected	GTGTGCATTTGCAGGA	MIMAT0025177					0
mmu-miR-874-3p	4.18121	2.06392	4.18121	up	74.3492	62.6899	7.1109	5.04698	Detected	Detected	TCGGTCCCTCGGG	MIMAT0004853	chr13	58124551	58124540	+	0
mmu-miR-874-5p	1.63844	0.712327	1.63844	up	0.1	0.1	-2.60961	-3.32194	Not Detected	Not Detected	CTTACCCTGGTGCG	MIMAT0017268	chr13	58124516	58124504	+	0
mmu-miR-875-3p	1.63844	0.712327	1.63844	up	0.1	0.1	-2.60961	-3.32194	Not Detected	Not Detected	CATAGCCTCAGTATTTT	MIMAT0004938					0
mmu-miR-875-5p	1.63844	0.712327	1.63844	up	0.1	0.1	-2.60961	-3.32194	Not Detected	Not Detected	CACCTGATAAAACTGAGGTAT	MIMAT0004937					0
mmu-miR-876-3p	1.63844	0.712327	1.63844	up	0.1	0.1	-2.60961	-3.32194	Not Detected	Not Detected	TGAATTACTTTGTAAACCACTA	MIMAT0004855					0
mmu-miR-876-5p	1.63844	0.712327	1.63844	up	0.1	0.1	-2.60961	-3.32194	Not Detected	Not Detected	TAGTGATTCACAGAGAAATCCA	MIMAT0004854					0
mmu-miR-877-3p	2.44561	1.2902	2.44561	up	21.7541	30.2412	5.36357	4.07338	Detected	Detected	TGGGAGGAGGGAGAAGA	MIMAT0004862	chr17	36097758	36097743	+	0
mmu-miR-877-5p	2.77982	1.47499	2.77982	up	76.2714	97.3443	7.14397	5.66898	Detected	Detected	CCCTGCGCCATCT	MIMAT0004861	chr17	36097694	36097683	+	0
mmu-miR-878-3p	1.08664	0.119873	1.08664	up	23.1223	77.9204	5.48345	5.36357	Detected	Detected	TCTACCCAGTGTGGT	MIMAT0004933					0
mmu-miR-878-5p	1.63844	0.712327	1.63844	up	0.1	0.1	-2.60961	-3.32194	Not Detected	Not Detected	TGTCTTGACATCCAACTA	MIMAT0004932					0
mmu-miR-879-3p	1.63844	0.712327	1.63844	up	0.1	0.1	-2.60961	-3.32194	Not Detected	Not Detected	CCGAAAGCTTGAAGCCAT	MIMAT0004843	chr5	9375753	9375769	-	0
mmu-miR-879-5p	1.63844	0.712327	1.63844	up	0.1	0.1	-2.60961	-3.32194	Not Detected	Not Detected	GGCTTAGAGCTATAAGCCT	MIMAT0004842	chr5	9375717	9375734	-	0
mmu-miR-880-3p	-3.83275	-1.93838	3.83275	down	0.1	3.94346	-2.60961	-0.671233	Not Detected	Detected	TCTACTCAGAGAGGATGGA	MIMAT0004844	chrX	64053772	64053755	+	0
mmu-miR-880-5p	1.63844	0.712327	1.63844	up	0.1	0.1	-2.60961	-3.32194	Not Detected	Not Detected	TGACTCATATCAATCTGAGT	MIMAT0017266	chrX	64053735	64053717	+	0
mmu-miR-881-3p	1.63844	0.712327	1.63844	up	0.1	0.1	-2.60961	-3.32194	Not Detected	Not Detected	TCTATTCAGAAAAGACACAGTT	MIMAT0004846	chrX	64055186	64055166	+	0
mmu-miR-881-5p	1.63844	0.712327	1.63844	up	0.1	0.1	-2.60961	-3.32194	Not Detected	Not Detected	AGATGTGACTGTTATCTCTC	MIMAT0004845	chrX	64055154	64055136	+	0
mmu-miR-882	32.8936	5.03974	32.8936	up	7.95959	1.95262	3.86148	-1.17826	Detected	Detected	ACTAATGCGCTAACTCTCTC	MIMAT0004847					0
mmu-miR-883a-3p	1.63844	0.712327	1.63844	up	0.1	0.1	-2.60961	-3.32194	Not Detected	Not Detected	ATACTGAGAGCTGTTGCAG	MIMAT0004849					0
mmu-miR-883a-5p	9.58008	3.26004	9.58008	up	4.23775	8.71773	3.16105	-0.0989878	Detected	Detected	GTAACTGCTACTTCTCTCA	MIMAT0004848					0
mmu-miR-883b-3p	1.63844	0.712327	1.63844	up	0.1	0.1	-2.60961	-3.32194	Not Detected	Not Detected	ATACTGAGAGATGTTGCAGT	MIMAT0004851					0
mmu-miR-883b-5p	302.136	8.23905	302.136	up	16.1417	0.1	4.91711	-3.32194	Detected	Not Detected	TGACTGCTACCCATT	MIMAT0004850					0
mmu-miR-9-3p	-8.0741	-3.0133	8.0741	down	15.1172	434.736	4.81698	7.83028	Detected	Detected	ACTTTCGGTTATCTAGCTT	MIMAT0000143	chr3	88019577	88019595	-	0
mmu-miR-9-5p	-245.201	-7.93782	245.201	down	0.1	75.4174	-2.60961	5.32821	Not Detected	Detected	TCATACAGCTAGATAACCA	MIMAT0000142	chr3	88019539	88019557	-	0
mmu-miR-92a-1-5p	1.63844	0.712327	1.63844	up	0.1	0.1	-2.60961	-3.32194	Not Detected	Not Detected	AGCATTGCGACAAATCC	MIMAT0017066	chr14	115443666	115443681	-	0
mmu-miR-92a-2-5p	-7.20404	-2.84881	7.20404	down	0.1	13.9319	-2.60961	0.239194	Not Detected	Detected	GTAATGCCACCAATCCCC	MIMAT0004635	chrX	50095051	50095034	+	0
mmu-miR-92a-3p	-1.6784	-0.747085	1.6784	down	2981.02	21114.5	12.5168	13.2639	Detected	Detected	CAGGCCGGGACAAGTGC	MIMAT0000539	chr14	115443702	115443718	-	0
mmu-miR-92b-3p	26.4364	4.72445	26.4364	up	15.6835	12.1749	4.86641	0.141957	Detected	Detected	GGAGGCCGGGACG	MIMAT0004899	chr3	89031110	89031099	+	0
mmu-miR-92b-5p	-62.5463	-5.96685	62.5463	down	0.1	20.8925	-2.60961	3.35724	Not Detected	Detected	AACACTGCACCACGT	MIMAT0017278	chr3	89031071	89031058	+	0
mmu-miR-93-3p	5.54534	2.47128	5.54534	up	1.54691	7.58686	2.27206	-0.199213	Detected	Detected	CGGGAAGTGCTAGCTC	MIMAT0004636	chr5	138606825	138606811	+	0
mmu-miR-93-5p	-9.05424	-3.17859	9.05424	down	161.602	4580.65	8.16665	11.3452	Detected	Detected	CTACCTGCACGAACAG	MIMAT0000540	chr5	138606787	138606773	+	0
mmu-miR-935	1.63844	0.712327	1.63844	up	0.1	0.1	-2.60961	-3.32194	Not Detected	Not Detected	GCGGTAGCGGAAGC	MIMAT0035718					0
mmu-miR-96-3p	1.63844	0.712327	1.63844	up	0.1	0.1	-2.60961	-3.32194	Not Detected	Not Detected	ATATTGGCACTACACATGA	MIMAT0017021	chr6	30119532	30119515	+	0
mmu-miR-96-5p	-12.7006	-3.66682	12.7006	down	276.499	12696.9	8.93374	12.6006	Detected	Detected	AGCAAAAATGTGCTAGTGCCAA	MIMAT0000541	chr6	30119491	30119471	+	0
mmu-miR-9768-3p	1.63844	0.712327	1.63844	up	0.1	0.1	-2.60961	-3.32194	Not Detected	Not Detected	CTGGGCCACACAAA	MIMAT0036460					0
mmu-miR-9768-5p	41.3222	5.36885	41.3222	up	20.5638	8.72808	5.27071	-0.0981319	Detected	Detected	ACAGTGCCGTCCTC	MIMAT0036459					0
mmu-miR-9769-3p	-3.55717	-1.83073	3.55717	down	0.1	3.39677	-2.60961	-0.778882	Not Detected	Detected	GGAGGACACAGAACAG	MIMAT0036462					0
mmu-miR-9769-5p	13.9056	3.7976	13.9056	up	8.16862	11.4978	3.89828	0.10068	Detected	Detected	GGTCGGGCCTAATTC	MIMAT0036461					0
mmu-miR-98-3p	1.63844	0.712327	1.63844	up	0.1	0.1	-2.60961	-3.32194	Not Detected	Not Detected	AGGAAAGTAGTAAGTTGTATAG	MIMAT0017023	chrX	148347831	148347851	-	0
mmu-miR-98-5p	15.1404	3.92033	15.1404	up	70.0842	18.5068	7.03261	3.11228	Detected	Detected	AACAATACAACTTACTACCTCA	MIMAT0000545	chrX	148347773	148347793	-	0
mmu-miR-99a-3p	1.63844	0.712327	1.63844	up	0.1	0.1	-2.60961	-3.32194	Not Detected	Not Detected	AGACCCATAGAAACGAGC	MIMAT0016981	chr16	77599226	77599242	-	0
mmu-miR-99a-5p	233.012	7.86426	233.012	up	95.5645	5.524	7.43615	-0.428107	Detected	Detected	CACAAGATCGGATCTACGG	MIMAT0000131	chr16	77599189	77599206	-	0
mmu-miR-99b-3p	-1.03197	-0.0453949	1.03197	down	22.7621	86.563	5.43805	5.48345	Detected	Detected	CGGACCCACAGACAC	MIMAT0004525	chr17	17967204	17967217	-	0
mmu-miR-99b-5p	2.01127	1.00811	2.01127	up	198.522	323.218	8.49419	7.48608	Detected	Detected	CGCAAGGTCGGTTCTA	MIMAT0000132	chr17	17967165	17967179	-	0

## Sheet: Supplementary Table S2
GeneID	miRNA	Symbol	description
435965	mmu-miR-125a-3p	Lrp3	low density lipoprotein receptor-related protein 3
74016	mmu-miR-34b-5p	Phf19	PHD finger protein 19
68404	mmu-miR-423-5p	Nrn1	neuritin 1
12814	mmu-miR-669h-5p	Col11a1	collagen, type XI, alpha 1
229715	mmu-miR-125a-5p	Amigo1	adhesion molecule with Ig like domain 1
22290	mmu-miR-883b-5p	Uty	ubiquitously transcribed tetratricopeptide repeat gene, Y chromosome
15446	mmu-miR-362-5p	Hpgd	hydroxyprostaglandin dehydrogenase 15 (NAD)
320129	mmu-miR-484	Adrbk2	adrenergic receptor kinase, beta 2
67414	mmu-miR-883b-5p	Mfn1	mitofusin 1
241576	mmu-miR-882	Ldlrad3	low density lipoprotein receptor class A domain containing 3
54712	mmu-miR-466i-3p	Plxnc1	plexin C1
109079	mmu-miR-466j	Sephs1	selenophosphate synthetase 1
67370	mmu-miR-717	Zfp606	zinc finger protein 606
14390	mmu-miR-883a-5p	Gabpa	GA repeat binding protein, alpha
51902	mmu-miR-1190	Rnf24	ring finger protein 24
114714	mmu-miR-466j	Rad51c	RAD51 paralog C
20614	mmu-miR-466h-5p	Snap25	synaptosomal-associated protein 25
218914	mmu-miR-669h-5p	Wapl	WAPL cohesin release factor
171281	mmu-miR-466a-5p	Acot3	acyl-CoA thioesterase 3
11924	mmu-miR-1187	Neurog2	neurogenin 2
74117	mmu-miR-291a-5p	Actr3	ARP3 actin-related protein 3
56198	mmu-miR-297b-5p	Heyl	hairy/enhancer-of-split related with YRPW motif-like
71779	mmu-miR-292a-3p	2016-03-08	membrane-associated ring finger (C3HC4) 8
13003	mmu-miR-345-3p	Vcan	versican
216558	mmu-miR-1191a	Ugp2	UDP-glucose pyrophosphorylase 2
19043	mmu-miR-335-3p	Ppm1b	protein phosphatase 1B, magnesium dependent, beta isoform
319653	mmu-miR-291a-3p	Slc25a40	solute carrier family 25, member 40
237775	mmu-miR-188-5p	Zfp867	zinc finger protein 867
73192	mmu-miR-466f-3p	Xpot	exportin, tRNA (nuclear export receptor for tRNAs)
233033	mmu-miR-883a-5p	Samd4b	sterile alpha motif domain containing 4B
218100	mmu-miR-207	Zfp322a	zinc finger protein 322A
68166	mmu-miR-129-5p	Spire1	spire homolog 1 (Drosophila)
74200	mmu-miR-690	2810403A07Rik	RIKEN cDNA 2810403A07 gene
54486	mmu-miR-292a-3p	Hpgds	hematopoietic prostaglandin D synthase
20359	mmu-miR-702-3p	Sema6b	sema domain, transmembrane domain (TM), and cytoplasmic domain, (semaphorin) 6B
69077	mmu-miR-770-5p	Psmd11	proteasome (prosome, macropain) 26S subunit, non-ATPase, 11
14658	mmu-miR-466j	Glrb	glycine receptor, beta subunit
72480	mmu-miR-484	Tspyl4	TSPY-like 4
69538	mmu-miR-666-5p	Antxr1	anthrax toxin receptor 1
14702	mmu-miR-540-3p	Gng2	guanine nucleotide binding protein (G protein), gamma 2
23958	mmu-miR-292a-3p	Nr2e3	nuclear receptor subfamily 2, group E, member 3
66624	mmu-miR-34b-5p	Spcs2	signal peptidase complex subunit 2 homolog (S. cerevisiae)
67564	mmu-miR-883b-5p	Tmem35	transmembrane protein 35
15560	mmu-miR-466f-5p	Htr2c	5-hydroxytryptamine (serotonin) receptor 2C
18725	mmu-miR-129-5p	Pira2	paired-Ig-like receptor A2
239420	mmu-miR-340-5p	Csmd3	CUB and Sushi multiple domains 3
70747	mmu-miR-466j	Tspan2	tetraspanin 2
208440	mmu-miR-380-5p	Dip2c	disco interacting protein 2 homolog C
208366	mmu-miR-466i-3p	Rpp40	ribonuclease P 40 subunit
68226	mmu-miR-126a-5p	Efcab2	EF-hand calcium binding domain 2
105005	mmu-miR-292a-5p	Fam84a	family with sequence similarity 84, member A
244548	mmu-miR-466j	Elmod2	ELMO/CED-12 domain containing 2
18574	mmu-miR-125a-3p	Pde1b	phosphodiesterase 1B, Ca2+-calmodulin dependent
574403	mmu-miR-804	Fam196b	family with sequence similarity 196, member B
74026	mmu-miR-686	Msl1	male-specific lethal 1 homolog (Drosophila)
494448	mmu-miR-296-5p	Cbx6	chromobox 6
14394	mmu-miR-666-3p	Gabra1	gamma-aminobutyric acid (GABA) A receptor, subunit alpha 1
11991	mmu-miR-743b-3p	Hnrnpd	heterogeneous nuclear ribonucleoprotein D
22754	mmu-miR-331-5p	Zfp92	zinc finger protein 92
103573	mmu-miR-679-5p	Xpo1	exportin 1
236899	mmu-miR-666-3p	Pcyt1b	phosphate cytidylyltransferase 1, choline, beta isoform
75580	mmu-miR-680	Zbtb4	zinc finger and BTB domain containing 4
101685	mmu-miR-188-3p	Spty2d1	SPT2, Suppressor of Ty, domain containing 1 (S. cerevisiae)
232341	mmu-miR-666-3p	Wnk1	WNK lysine deficient protein kinase 1
14677	mmu-miR-540-3p	Gnai1	guanine nucleotide binding protein (G protein), alpha inhibiting 1
12018	mmu-miR-717	Bak1	BCL2-antagonist/killer 1
20650	mmu-miR-717	Sntb2	syntrophin, basic 2
18176	mmu-miR-212-3p	Nras	neuroblastoma ras oncogene
77407	mmu-miR-883b-5p	Rab35	RAB35, member RAS oncogene family
329003	mmu-miR-199a-5p	Zfp516	zinc finger protein 516
26442	mmu-miR-466g	Psma5	proteasome (prosome, macropain) subunit, alpha type 5
70397	mmu-miR-345-3p	Tmem70	transmembrane protein 70
67695	mmu-miR-296-5p	Ost4	oligosaccharyltransferase complex subunit 4 (non-catalytic)
78688	mmu-miR-763	Nol3	nucleolar protein 3 (apoptosis repressor with CARD domain)
16907	mmu-miR-760-3p	Lmnb2	lamin B2
74165	mmu-miR-669h-5p	Fbxl22	F-box and leucine-rich repeat protein 22
19360	mmu-miR-466h-5p	Rad50	RAD50 double strand break repair protein
78923	mmu-miR-679-5p	Chsy3	chondroitin sulfate synthase 3
69601	mmu-miR-484	Dab2ip	disabled 2 interacting protein
54725	mmu-miR-345-3p	Cadm1	cell adhesion molecule 1
544963	mmu-miR-717	Iqgap2	IQ motif containing GTPase activating protein 2
11790	mmu-miR-125b-5p	Speg	SPEG complex locus
232164	mmu-miR-207	Paip2b	poly(A) binding protein interacting protein 2B
244421	mmu-miR-666-5p	Lonrf1	LON peptidase N-terminal domain and ring finger 1
68146	mmu-miR-871-5p	Arl13b	ADP-ribosylation factor-like 13B
320802	mmu-miR-760-3p	Ifitm10	interferon induced transmembrane protein 10
11750	mmu-miR-669h-5p	Anxa7	annexin A7
18189	mmu-miR-669a-5p	Nrxn1	neurexin I
12804	mmu-miR-296-5p	Cntfr	ciliary neurotrophic factor receptor
226849	mmu-miR-34b-5p	Ppp2r5a	protein phosphatase 2, regulatory subunit B', alpha
353236	mmu-miR-466h-5p	Pcdhac1	protocadherin alpha subfamily C, 1
13555	mmu-miR-362-3p	E2f1	E2F transcription factor 1
14800	mmu-miR-466j	Gria2	glutamate receptor, ionotropic, AMPA2 (alpha 2)
14544	mmu-miR-466i-3p	Gda	guanine deaminase
76897	mmu-miR-466h-5p	Ralyl	RALY RNA binding protein-like
19246	mmu-miR-760-3p	Ptpn1	protein tyrosine phosphatase, non-receptor type 1
12874	mmu-miR-345-3p	Cpd	carboxypeptidase D
20466	mmu-miR-466i-3p	Sin3a	transcriptional regulator, SIN3A (yeast)
226359	mmu-miR-669h-5p	C1ql2	complement component 1, q subcomponent-like 2
19342	mmu-miR-125a-3p	Rab4b	RAB4B, member RAS oncogene family
78748	mmu-miR-484	Rassf10	Ras association (RalGDS/AF-6) domain family (N-terminal) member 10
259172	mmu-miR-702-3p	Mfrp	membrane frizzled-related protein
12569	mmu-miR-129-2-3p	Cdk5r1	cyclin-dependent kinase 5, regulatory subunit 1 (p35)
53310	mmu-miR-680	Dlg3	discs, large homolog 3 (Drosophila)
237029	mmu-miR-763	4932411N23Rik	RIKEN cDNA 4932411N23 gene
14586	mmu-miR-129-5p	Gfra2	glial cell line derived neurotrophic factor family receptor alpha 2
74287	mmu-miR-490-3p	Kcmf1	potassium channel modulatory factor 1
67412	mmu-miR-1190	Soga3	SOGA family member 3
619597	mmu-miR-291a-5p	Gm6086	predicted gene 6086
98396	mmu-miR-291a-5p	Slc41a1	solute carrier family 41, member 1
76308	mmu-miR-423-5p	Rab1b	RAB1B, member RAS oncogene family
77945	mmu-miR-760-3p	Rpgrip1	retinitis pigmentosa GTPase regulator interacting protein 1
56013	mmu-miR-882	Srcin1	SRC kinase signaling inhibitor 1
100201	mmu-miR-188-3p	Tmem64	transmembrane protein 64
81006	mmu-miR-362-3p	Gpr63	G protein-coupled receptor 63
14408	mmu-miR-292a-3p	Gabrr1	gamma-aminobutyric acid (GABA) C receptor, subunit rho 1
280645	mmu-miR-770-3p	B3gat2	beta-1,3-glucuronyltransferase 2 (glucuronosyltransferase S)
21907	mmu-miR-297b-5p	Nr2e1	nuclear receptor subfamily 2, group E, member 1
21812	mmu-miR-142a-3p	Tgfbr1	transforming growth factor, beta receptor I
17300	mmu-miR-450b-5p	Foxc1	forkhead box C1
13798	mmu-miR-342-5p	En1	engrailed 1
22439	mmu-miR-883a-5p	Xk	X-linked Kx blood group
68877	mmu-miR-666-3p	Maf1	MAF1 homolog, negative regulator of RNA polymerase III
51788	mmu-miR-212-3p	H2afz	H2A histone family, member Z
269037	mmu-miR-763	Ctif	CBP80/20-dependent translation initiation factor
18516	mmu-miR-297b-5p	Pbx3	pre B cell leukemia homeobox 3
56461	mmu-miR-129-5p	Kcnip3	Kv channel interacting protein 3, calsenilin
53901	mmu-miR-682	Rcan2	regulator of calcineurin 2
16362	mmu-miR-290a-3p	Irf1	interferon regulatory factor 1
52428	mmu-miR-291a-5p	Rhpn2	rhophilin, Rho GTPase binding protein 2
75106	mmu-miR-466j	4930519F16Rik	RIKEN cDNA 4930519F16 gene
13840	mmu-miR-770-3p	Epha6	Eph receptor A6
56409	mmu-miR-466j	Nudt3	nudix (nucleotide diphosphate linked moiety X)-type motif 3
19221	mmu-miR-207	Ptgfrn	prostaglandin F2 receptor negative regulator
29808	mmu-miR-450b-5p	Mga	MAX gene associated
56741	mmu-miR-690	Igdcc4	immunoglobulin superfamily, DCC subclass, member 4
20648	mmu-miR-666-3p	Snta1	syntrophin, acidic 1
18491	mmu-miR-466f-3p	Pappa	pregnancy-associated plasma protein A
225659	mmu-miR-669f-3p	Cep76	centrosomal protein 76
223770	mmu-miR-532-3p	Brd1	bromodomain containing 1
140792	mmu-miR-466a-5p	Colec12	collectin sub-family member 12
22099	mmu-miR-763	Tsn	translin
54131	mmu-miR-666-3p	Irf3	interferon regulatory factor 3
76884	mmu-miR-291a-5p	Cyfip2	cytoplasmic FMR1 interacting protein 2
11433	mmu-miR-542-3p	Acp5	acid phosphatase 5, tartrate resistant
14538	mmu-miR-207	Gcnt2	glucosaminyl (N-acetyl) transferase 2, I-branching enzyme
19047	mmu-miR-292a-3p	Ppp1cc	protein phosphatase 1, catalytic subunit, gamma isoform
16561	mmu-miR-671-3p	Kif1b	kinesin family member 1B
224405	mmu-miR-882	Cyyr1	cysteine and tyrosine-rich protein 1
11534	mmu-miR-345-3p	Adk	adenosine kinase
226154	mmu-miR-763	Lzts2	leucine zipper, putative tumor suppressor 2
75767	mmu-miR-291a-5p	Rab11fip1	RAB11 family interacting protein 1 (class I)
13854	mmu-miR-342-5p	Epn1	epsin 1
20563	mmu-miR-207	Slit2	slit homolog 2 (Drosophila)
14609	mmu-miR-466i-3p	Gja1	gap junction protein, alpha 1
246103	mmu-miR-883b-5p	Atxn7	ataxin 7
225028	mmu-miR-666-3p	Map4k3	mitogen-activated protein kinase kinase kinase kinase 3
16400	mmu-miR-669h-5p	Itga3	integrin alpha 3
56758	mmu-miR-686	Mbnl1	muscleblind-like 1 (Drosophila)
74386	mmu-miR-484	Rmi1	RecQ mediated genome instability 1
17258	mmu-miR-450b-5p	Mef2a	myocyte enhancer factor 2A
14594	mmu-miR-680	Ggta1	glycoprotein galactosyltransferase alpha 1, 3
69834	mmu-miR-34b-5p	Rab43	RAB43, member RAS oncogene family
14536	mmu-miR-883a-5p	Nr6a1	nuclear receptor subfamily 6, group A, member 1
66684	mmu-miR-804	Tceal8	transcription elongation factor A (SII)-like 8
13175	mmu-miR-290a-5p	Dclk1	doublecortin-like kinase 1
12394	mmu-miR-199a-3p	Runx1	runt related transcription factor 1
19088	mmu-miR-490-3p	Prkar2b	protein kinase, cAMP dependent regulatory, type II beta
227292	mmu-miR-423-5p	Ctdsp1	CTD (carboxy-terminal domain, RNA polymerase II, polypeptide A) small phosphatase 1
21841	mmu-miR-466h-5p	Tia1	cytotoxic granule-associated RNA binding protein 1
56805	mmu-miR-490-3p	Zbtb33	zinc finger and BTB domain containing 33
12289	mmu-miR-711	Cacna1d	calcium channel, voltage-dependent, L type, alpha 1D subunit
217169	mmu-miR-125a-3p	Tns4	tensin 4
63985	mmu-miR-34b-5p	Gmfb	glia maturation factor, beta
226025	mmu-miR-339-5p	Trpm3	transient receptor potential cation channel, subfamily M, member 3
104457	mmu-miR-540-3p	0610010K14Rik	RIKEN cDNA 0610010K14 gene
14758	mmu-miR-540-3p	Gpm6b	glycoprotein m6b
12842	mmu-miR-296-3p	Col1a1	collagen, type I, alpha 1
22780	mmu-miR-125b-5p	Ikzf3	IKAROS family zinc finger 3
22634	mmu-miR-331-5p	Plagl1	pleiomorphic adenoma gene-like 1
23947	mmu-miR-199a-3p	Mid2	midline 2
26877	mmu-miR-804	B3galt1	UDP-Gal:betaGlcNAc beta 1,3-galactosyltransferase, polypeptide 1
268390	mmu-miR-760-3p	Ahsa2	AHA1, activator of heat shock protein ATPase 2
243312	mmu-miR-1187	Elfn1	leucine rich repeat and fibronectin type III, extracellular 1
13006	mmu-miR-290a-5p	Smc3	structural maintenance of chromosomes 3
77038	mmu-miR-362-3p	Arfgap2	ADP-ribosylation factor GTPase activating protein 2
55983	mmu-miR-297b-5p	Pdzrn3	PDZ domain containing RING finger 3
14853	mmu-miR-362-3p	Gspt2	G1 to S phase transition 2
15416	mmu-miR-450b-3p	Hoxb8	homeobox B8
217219	mmu-miR-188-3p	Fam171a2	family with sequence similarity 171, member A2
99031	mmu-miR-883a-5p	Osbpl6	oxysterol binding protein-like 6
75991	mmu-miR-883b-5p	Slain2	SLAIN motif family, member 2
67581	mmu-miR-292a-3p	Tbc1d23	TBC1 domain family, member 23
240869	mmu-miR-142a-3p	Zbtb37	zinc finger and BTB domain containing 37
72290	mmu-miR-212-3p	Lsm11	U7 snRNP-specific Sm-like protein LSM11
19653	mmu-miR-682	Rbm4	RNA binding motif protein 4
170483	mmu-miR-682	Grin3b	glutamate receptor, ionotropic, NMDA3B
209027	mmu-miR-687	Pycr1	pyrroline-5-carboxylate reductase 1
80718	mmu-miR-465b-5p	Rab27b	RAB27B, member RAS oncogene family
14165	mmu-miR-291b-3p	Fgf10	fibroblast growth factor 10
109113	mmu-miR-669h-3p	Uhrf2	ubiquitin-like, containing PHD and RING finger domains 2
319622	mmu-miR-770-5p	Itpripl2	inositol 1,4,5-triphosphate receptor interacting protein-like 2
21428	mmu-miR-465b-5p	Mlx	MAX-like protein X
114142	mmu-miR-34b-5p	Foxp2	forkhead box P2
268469	mmu-miR-682	Zfp652	zinc finger protein 652
75553	mmu-miR-212-3p	Zc3h14	zinc finger CCCH type containing 14
227683	mmu-miR-871-5p	Coq4	coenzyme Q4
50790	mmu-miR-34b-5p	Acsl4	acyl-CoA synthetase long-chain family member 4
17380	mmu-miR-690	Mme	membrane metallo endopeptidase
330119	mmu-miR-501-3p	Adamts3	a disintegrin-like and metallopeptidase (reprolysin type) with thrombospondin type 1 motif, 3
11909	mmu-miR-466i-3p	Atf2	activating transcription factor 2
56453	mmu-miR-760-3p	Mbtps1	membrane-bound transcription factor peptidase, site 1
269713	mmu-miR-760-3p	Clip2	CAP-GLY domain containing linker protein 2
59011	mmu-miR-679-5p	Myoz1	myozenin 1
11642	mmu-miR-760-3p	Akap3	A kinase (PRKA) anchor protein 3
12751	mmu-miR-466j	Tpp1	tripeptidyl peptidase I
432442	mmu-miR-679-5p	Akap7	A kinase (PRKA) anchor protein 7
244421	mmu-miR-466i-3p	Lonrf1	LON peptidase N-terminal domain and ring finger 1
76969	mmu-miR-466h-5p	Chst1	carbohydrate (keratan sulfate Gal-6) sulfotransferase 1
216792	mmu-miR-466a-5p	Iba57	IBA57 homolog, iron-sulfur cluster assembly
73728	mmu-miR-296-5p	Psd	pleckstrin and Sec7 domain containing
80985	mmu-miR-466i-3p	Trim44	tripartite motif-containing 44
67166	mmu-miR-1190	Arl8b	ADP-ribosylation factor-like 8B
107260	mmu-miR-324-5p	Otub1	OTU domain, ubiquitin aldehyde binding 1
107022	mmu-miR-883a-5p	Gramd3	GRAM domain containing 3
96875	mmu-miR-331-5p	Prg4	proteoglycan 4 (megakaryocyte stimulating factor, articular superficial zone protein)
26563	mmu-miR-450b-5p	Ror1	receptor tyrosine kinase-like orphan receptor 1
29811	mmu-miR-669a-5p	Ndrg2	N-myc downstream regulated gene 2
11848	mmu-miR-540-3p	Rhoa	ras homolog family member A
223775	mmu-miR-532-3p	Pim3	proviral integration site 3
234135	mmu-miR-291a-3p	Whsc1l1	Wolf-Hirschhorn syndrome candidate 1-like 1 (human)
101739	mmu-miR-466i-3p	Psip1	PC4 and SFRS1 interacting protein 1
67454	mmu-miR-490-3p	Ikbip	IKBKB interacting protein
54325	mmu-miR-188-5p	Elovl1	elongation of very long chain fatty acids (FEN1/Elo2, SUR4/Elo3, yeast)-like 1
67228	mmu-miR-125a-3p	Dph7	diphthamine biosynethesis 7
66254	mmu-miR-669a-5p	Dimt1	DIM1 dimethyladenosine transferase 1-like (S. cerevisiae)
12227	mmu-miR-770-3p	Btg2	B cell translocation gene 2, anti-proliferative
57316	mmu-miR-883a-5p	C1d	C1D nuclear receptor co-repressor
69769	mmu-miR-882	Tnfaip8l2	tumor necrosis factor, alpha-induced protein 8-like 2
15432	mmu-miR-199a-5p	Hoxd12	homeobox D12
574402	mmu-miR-680	Gpr17	G protein-coupled receptor 17
20516	mmu-miR-423-5p	Slc20a2	solute carrier family 20, member 2
22628	mmu-miR-713	Ywhag	tyrosine 3-monooxygenase/tryptophan 5-monooxygenase activation protein, gamma polypeptide
12660	mmu-miR-763	Chka	choline kinase alpha
14634	mmu-miR-466f-3p	Gli3	GLI-Kruppel family member GLI3
27049	mmu-miR-1190	Etv3	ets variant 3
22717	mmu-miR-125a-5p	Zfp59	zinc finger protein 59
70568	mmu-miR-666-3p	Cpne3	copine III
19708	mmu-miR-882	Dpf2	D4, zinc and double PHD fingers family 2
224705	mmu-miR-125a-3p	Vps52	VPS52 GARP complex subunit
208846	mmu-miR-466j	Daam1	dishevelled associated activator of morphogenesis 1
68477	mmu-miR-679-5p	Rmnd5a	required for meiotic nuclear division 5 homolog A
13429	mmu-miR-770-5p	Dnm1	dynamin 1
109151	mmu-miR-669h-5p	Chd9	chromodomain helicase DNA binding protein 9
19043	mmu-miR-207	Ppm1b	protein phosphatase 1B, magnesium dependent, beta isoform
30841	mmu-miR-666-3p	Kdm2b	lysine (K)-specific demethylase 2B
74551	mmu-miR-291a-3p	Pck2	phosphoenolpyruvate carboxykinase 2 (mitochondrial)
170644	mmu-miR-804	Ubn1	ubinuclein 1
70155	mmu-miR-467f	Ogfrl1	opioid growth factor receptor-like 1
17865	mmu-miR-423-5p	Mybl2	myeloblastosis oncogene-like 2
94109	mmu-miR-666-3p	Csmd1	CUB and Sushi multiple domains 1
11777	mmu-miR-669h-5p	Ap3s1	adaptor-related protein complex 3, sigma 1 subunit
227154	mmu-miR-188-3p	Stradb	STE20-related kinase adaptor beta
208869	mmu-miR-331-5p	Dock3	dedicator of cyto-kinesis 3
16177	mmu-miR-680	Il1r1	interleukin 1 receptor, type I
218975	mmu-miR-467f	Mapk1ip1l	mitogen-activated protein kinase 1 interacting protein 1-like
16370	mmu-miR-466i-3p	Irs4	insulin receptor substrate 4
219094	mmu-miR-702-3p	Khnyn	KH and NYN domain containing
70797	mmu-miR-680	Ankib1	ankyrin repeat and IBR domain containing 1
56274	mmu-miR-466d-3p	Stk3	serine/threonine kinase 3
76441	mmu-miR-763	Daam2	dishevelled associated activator of morphogenesis 2
18993	mmu-miR-466h-5p	Pou3f3	POU domain, class 3, transcription factor 3
70061	mmu-miR-760-3p	Sdr9c7	4short chain dehydrogenase/reductase family 9C, member 7
56212	mmu-miR-339-5p	Rhog	ras homolog family member G
80289	mmu-miR-290a-3p	Lysmd3	LysM, putative peptidoglycan-binding, domain containing 3
97961	mmu-miR-291a-3p	Nol12	nucleolar protein 12
67102	mmu-miR-423-5p	D16Ertd472e	DNA segment, Chr 16, ERATO Doi 472, expressed
18710	mmu-miR-296-3p	Pik3r3	phosphatidylinositol 3 kinase, regulatory subunit, polypeptide 3 (p55)
69082	mmu-miR-345-3p	Zc3h15	zinc finger CCCH-type containing 15
73699	mmu-miR-125a-3p	Ppp2r1b	protein phosphatase 2, regulatory subunit A, beta
67657	mmu-miR-466b-3p	Rabl3	RAB, member RAS oncogene family-like 3
234358	mmu-miR-871-5p	Zfp930	zinc finger protein 930
22239	mmu-miR-296-3p	Ugt8a	UDP galactosyltransferase 8A
73341	mmu-miR-679-5p	Arhgef6	Rac/Cdc42 guanine nucleotide exchange factor (GEF) 6
16508	mmu-miR-1190	Kcnd2	potassium voltage-gated channel, Shal-related family, member 2
19230	mmu-miR-760-3p	Twf1	twinfilin actin binding protein 1
319758	mmu-miR-335-3p	Rfx7	regulatory factor X, 7
107767	mmu-miR-666-3p	Scamp1	secretory carrier membrane protein 1
22339	mmu-miR-467g	Vegfa	vascular endothelial growth factor A
20650	mmu-miR-690	Sntb2	syntrophin, basic 2
12504	mmu-miR-466j	Cd4	CD4 antigen
114249	mmu-miR-702-3p	Npnt	nephronectin
11658	mmu-miR-342-5p	Alcam	activated leukocyte cell adhesion molecule
232946	mmu-miR-540-3p	Bloc1s3	biogenesis of lysosomal organelles complex-1, subunit 3
242409	mmu-miR-339-5p	Tmem8b	transmembrane protein 8B
67382	mmu-miR-763	Brd3	bromodomain containing 3
237542	mmu-miR-669f-3p	Osbpl8	oxysterol binding protein-like 8
13797	mmu-miR-466j	Emx2	empty spiracles homeobox 2
52036	mmu-miR-362-3p	Ppp6r3	protein phosphatase 6, regulatory subunit 3
207375	mmu-miR-669f-3p	Fam120c	family with sequence similarity 120, member C
68828	mmu-miR-199a-5p	Sync	syncoilin
217335	mmu-miR-760-3p	Fbf1	Fas (TNFRSF6) binding factor 1
117600	mmu-miR-717	Srgap1	SLIT-ROBO Rho GTPase activating protein 1
67006	mmu-miR-466f-3p	Cisd2	CDGSH iron sulfur domain 2
218311	mmu-miR-324-5p	Zfp455	zinc finger protein 455
76568	mmu-miR-466a-5p	Ift46	intraflagellar transport 46
72461	mmu-miR-666-3p	Prcp	prolylcarboxypeptidase (angiotensinase C)
29859	mmu-miR-501-3p	Sult4a1	sulfotransferase family 4A, member 1
50932	mmu-miR-291a-3p	Mink1	misshapen-like kinase 1 (zebrafish)
217463	mmu-miR-882	Snx13	sorting nexin 13
24086	mmu-miR-615-3p	Tlk2	tousled-like kinase 2 (Arabidopsis)
78619	mmu-miR-142a-5p	Zfp449	zinc finger protein 449
93736	mmu-miR-883a-5p	Aff4	AF4/FMR2 family, member 4
214531	mmu-miR-466i-3p	Tmprss13	transmembrane protease, serine 13
215449	mmu-miR-770-5p	Rap1b	RAS related protein 1b
19243	mmu-miR-450b-5p	Ptp4a1	protein tyrosine phosphatase 4a1
78771	mmu-miR-188-5p	Mctp1	multiple C2 domains, transmembrane 1
52679	mmu-miR-666-3p	E2f7	E2F transcription factor 7
12753	mmu-miR-687	Clock	circadian locomotor output cycles kaput
12773	mmu-miR-760-3p	Ccr4	chemokine (C-C motif) receptor 4
50523	mmu-miR-466i-3p	Lats2	large tumor suppressor 2
16826	mmu-miR-188-3p	Ldb2	LIM domain binding 2
93706	mmu-miR-484	Pcdhgc3	protocadherin gamma subfamily C, 3
22772	mmu-miR-466h-5p	Zic2	zinc finger protein of the cerebellum 2
14545	mmu-miR-290a-5p	Gdap1	ganglioside-induced differentiation-associated-protein 1
20471	mmu-miR-666-3p	Six1	sine oculis-related homeobox 1
66860	mmu-miR-207	Tanc1	tetratricopeptide repeat, ankyrin repeat and coiled-coil containing 1
21824	mmu-miR-883a-5p	Thbd	thrombomodulin
19377	mmu-miR-679-5p	Rai1	retinoic acid induced 1
93712	mmu-miR-296-5p	Pcdhga4	protocadherin gamma subfamily A, 4
78655	mmu-miR-465b-5p	Eif3j1	eukaryotic translation initiation factor 3, subunit J1
338523	mmu-miR-207	Kdm7a	lysine (K)-specific demethylase 7A
231986	mmu-miR-466h-5p	Jazf1	JAZF zinc finger 1
77038	mmu-miR-207	Arfgap2	ADP-ribosylation factor GTPase activating protein 2
12168	mmu-miR-342-5p	Bmpr2	bone morphogenetic protein receptor, type II (serine/threonine kinase)
26895	mmu-miR-466f-3p	Cops7b	COP9 signalosome subunit 7B
14268	mmu-miR-342-5p	Fn1	fibronectin 1
50913	mmu-miR-291a-3p	Olig2	oligodendrocyte transcription factor 2
215114	mmu-miR-770-3p	Hip1	huntingtin interacting protein 1
14118	mmu-miR-883b-5p	Fbn1	fibrillin 1
93705	mmu-miR-484	Pcdhgb8	protocadherin gamma subfamily B, 8
108062	mmu-miR-666-3p	Cstf2	cleavage stimulation factor, 3' pre-RNA subunit 2
52502	mmu-miR-292a-5p	Carhsp1	calcium regulated heat stable protein 1
11964	mmu-miR-331-5p	Atp6v1a	ATPase, H+ transporting, lysosomal V1 subunit A
17863	mmu-miR-760-3p	Myb	myeloblastosis oncogene
233033	mmu-miR-1190	Samd4b	sterile alpha motif domain containing 4B
240843	mmu-miR-423-5p	Brinp2	bone morphogenic protein/retinoic acid inducible neural-specific 2
14613	mmu-miR-345-3p	Gja5	gap junction protein, alpha 5
18187	mmu-miR-466b-3p	Nrp2	neuropilin 2
53623	mmu-miR-125a-3p	Gria3	glutamate receptor, ionotropic, AMPA3 (alpha 3)
22408	mmu-miR-151-5p	Wnt1	wingless-type MMTV integration site family, member 1
67456	mmu-miR-207	Ergic2	ERGIC and golgi 2
15407	mmu-miR-296-3p	Hoxb1	homeobox B1
71302	mmu-miR-34b-5p	Arhgap26	Rho GTPase activating protein 26
231821	mmu-miR-125a-3p	Adap1	ArfGAP with dual PH domains 1
109676	mmu-miR-125a-3p	Ank2	ankyrin 2, brain
13682	mmu-miR-291a-5p	Eif4a2	eukaryotic translation initiation factor 4A2
77569	mmu-miR-882	Limch1	LIM and calponin homology domains 1
98415	mmu-miR-760-3p	Nucks1	nuclear casein kinase and cyclin-dependent kinase substrate 1
116873	mmu-miR-501-3p	Stim2	stromal interaction molecule 2
103080	mmu-miR-679-5p	2016-09-10	septin 10
56264	mmu-miR-770-5p	Cpxm1	carboxypeptidase X 1 (M14 family)
21346	mmu-miR-882	Tagln2	transgelin 2
12313	mmu-miR-291a-3p	Calm1	calmodulin 1
239167	mmu-miR-125a-3p	Synb	syncytin b
19877	mmu-miR-324-5p	Rock1	Rho-associated coiled-coil containing protein kinase 1
209630	mmu-miR-666-3p	Frmd4a	FERM domain containing 4A
108015	mmu-miR-871-5p	Chrnb4	cholinergic receptor, nicotinic, beta polypeptide 4
244668	mmu-miR-296-3p	Sipa1l2	signal-induced proliferation-associated 1 like 2
26381	mmu-miR-409-3p	Esrrg	estrogen-related receptor gamma
101095	mmu-miR-34b-5p	Zfp282	zinc finger protein 282
252966	mmu-miR-296-3p	Cables2	CDK5 and Abl enzyme substrate 2
13714	mmu-miR-291b-3p	Elk4	ELK4, member of ETS oncogene family
14007	mmu-miR-291b-3p	Celf2	CUGBP, Elav-like family member 2
18611	mmu-miR-484	Pea15a	phosphoprotein enriched in astrocytes 15A
54384	mmu-miR-199a-3p	Mtmr7	myotubularin related protein 7
76886	mmu-miR-466j	Fam81a	family with sequence similarity 81, member A
15572	mmu-miR-212-3p	Elavl4	ELAV (embryonic lethal, abnormal vision, Drosophila)-like 4 (Hu antigen D)
77097	mmu-miR-582-5p	Tanc2	tetratricopeptide repeat, ankyrin repeat and coiled-coil containing 2
211612	mmu-miR-883a-5p	Ptchd1	patched domain containing 1
67878	mmu-miR-682	Tmem33	transmembrane protein 33
68867	mmu-miR-760-3p	Rnf122	ring finger protein 122
14264	mmu-miR-669a-5p	Fmod	fibromodulin
380916	mmu-miR-342-5p	Lrch1	leucine-rich repeats and calponin homology (CH) domain containing 1
26987	mmu-miR-199a-5p	Eif4e2	eukaryotic translation initiation factor 4E member 2
320685	mmu-miR-297b-5p	Dctd	dCMP deaminase
52065	mmu-miR-680	Mfhas1	malignant fibrous histiocytoma amplified sequence 1
71745	mmu-miR-532-3p	Cul2	cullin 2
20745	mmu-miR-466f-3p	Spock1	sparc/osteonectin, cwcv and kazal-like domains proteoglycan 1
237615	mmu-miR-199a-3p	Ankrd52	ankyrin repeat domain 52
108155	mmu-miR-882	Ogt	O-linked N-acetylglucosamine (GlcNAc) transferase (UDP-N-acetylglucosamine:polypeptide-N-acetylglucosaminyl transferase)
109905	mmu-miR-666-3p	Rap1a	RAS-related protein-1a
229663	mmu-miR-212-3p	Csde1	cold shock domain containing E1, RNA binding
71355	mmu-miR-770-5p	Col24a1	collagen, type XXIV, alpha 1
14432	mmu-miR-882	Gap43	growth associated protein 43
14816	mmu-miR-296-3p	Grm1	glutamate receptor, metabotropic 1
20848	mmu-miR-292a-3p	Stat3	signal transducer and activator of transcription 3
211673	mmu-miR-687	Arfgef1	ADP-ribosylation factor guanine nucleotide-exchange factor 1(brefeldin A-inhibited)
241391	mmu-miR-125b-5p	Galnt5	UDP-N-acetyl-alpha-D-galactosamine:polypeptide N-acetylgalactosaminyltransferase 5
74007	mmu-miR-339-5p	Btbd11	BTB (POZ) domain containing 11
99167	mmu-miR-324-5p	Ssx2ip	synovial sarcoma, X breakpoint 2 interacting protein
225998	mmu-miR-199a-3p	Rorb	RAR-related orphan receptor beta
23828	mmu-miR-207	Bves	blood vessel epicardial substance
13796	mmu-miR-296-5p	Emx1	empty spiracles homeobox 1
30930	mmu-miR-292a-3p	Vps26a	VPS26 retromer complex component A
18551	mmu-miR-423-5p	Pcsk4	proprotein convertase subtilisin/kexin type 4
212163	mmu-miR-466h-5p	8030462N17Rik	RIKEN cDNA 8030462N17 gene
13548	mmu-miR-760-3p	Dyrk1a	dual-specificity tyrosine-(Y)-phosphorylation regulated kinase 1a
229663	mmu-miR-129-5p	Csde1	cold shock domain containing E1, RNA binding
56284	mmu-miR-125a-3p	Mrpl19	mitochondrial ribosomal protein L19
16572	mmu-miR-212-3p	Kif5a	kinesin family member 5A
72141	mmu-miR-760-3p	Adpgk	ADP-dependent glucokinase
12753	mmu-miR-466j	Clock	circadian locomotor output cycles kaput
50913	mmu-miR-125a-3p	Olig2	oligodendrocyte transcription factor 2
67412	mmu-miR-682	Soga3	SOGA family member 3
212442	mmu-miR-466j	Lactb2	lactamase, beta 2
93701	mmu-miR-296-5p	Pcdhgb4	protocadherin gamma subfamily B, 4
19299	mmu-miR-466i-3p	Abcd3	ATP-binding cassette, sub-family D (ALD), member 3
67199	mmu-miR-490-3p	Pfdn1	prefoldin 1
14168	mmu-miR-125a-3p	Fgf13	fibroblast growth factor 13
18550	mmu-miR-129-2-3p	Furin	furin (paired basic amino acid cleaving enzyme)
14886	mmu-miR-883a-5p	Gtf2i	general transcription factor II I
17974	mmu-miR-763	Nck2	non-catalytic region of tyrosine kinase adaptor protein 2
399510	mmu-miR-297b-5p	Map4k5	mitogen-activated protein kinase kinase kinase kinase 5
211739	mmu-miR-342-5p	Vstm2a	V-set and transmembrane domain containing 2A
20168	mmu-miR-713	Rtn3	reticulon 3
16502	mmu-miR-423-5p	Kcnc1	potassium voltage gated channel, Shaw-related subfamily, member 1
668620	mmu-miR-679-5p	Zfp936	zinc finger protein 936
225028	mmu-miR-466h-5p	Map4k3	mitogen-activated protein kinase kinase kinase kinase 3
22232	mmu-miR-151-5p	Slc35a2	solute carrier family 35 (UDP-galactose transporter), member A2
20979	mmu-miR-207	Syt1	synaptotagmin I
19698	mmu-miR-450b-3p	Relb	avian reticuloendotheliosis viral (v-rel) oncogene related B
245526	mmu-miR-423-5p	Pgr15l	G protein-coupled receptor 15-like
170770	mmu-miR-763	Bbc3	BCL2 binding component 3
15430	mmu-miR-466g	Hoxd10	homeobox D10
268902	mmu-miR-669a-5p	Robo2	roundabout guidance receptor 2
21387	mmu-miR-466h-5p	Tbx4	T-box 4
225283	mmu-miR-362-3p	Rprd1a	regulation of nuclear pre-mRNA domain containing 1A
22095	mmu-miR-465b-5p	Tshr	thyroid stimulating hormone receptor
227059	mmu-miR-713	Slc39a10	solute carrier family 39 (zinc transporter), member 10
71795	mmu-miR-297b-5p	Pitpnc1	phosphatidylinositol transfer protein, cytoplasmic 1
67072	mmu-miR-125a-5p	Cdc37l1	cell division cycle 37-like 1
229279	mmu-miR-129-2-3p	Hnrnpa3	heterogeneous nuclear ribonucleoprotein A3
74479	mmu-miR-212-3p	Snx11	sorting nexin 11
70373	mmu-miR-125a-3p	Gpatch2l	G patch domain containing 2 like
19885	mmu-miR-466j	Rorc	RAR-related orphan receptor gamma
16975	mmu-miR-467f	Lrp8	low density lipoprotein receptor-related protein 8, apolipoprotein e receptor
80907	mmu-miR-362-5p	Lactb	lactamase, beta
264895	mmu-miR-760-3p	Acsf2	acyl-CoA synthetase family member 2
233489	mmu-miR-142a-3p	Picalm	phosphatidylinositol binding clathrin assembly protein
108067	mmu-miR-770-3p	Eif2b3	eukaryotic translation initiation factor 2B, subunit 3
15561	mmu-miR-125a-3p	Htr3a	5-hydroxytryptamine (serotonin) receptor 3A
245404	mmu-miR-345-3p	Dcaf12l1	DDB1 and CUL4 associated factor 12-like 1
73124	mmu-miR-466f-3p	Golim4	golgi integral membrane protein 4
81000	mmu-miR-207	Rad54l2	RAD54 like 2 (S. cerevisiae)
16997	mmu-miR-679-5p	Ltbp2	latent transforming growth factor beta binding protein 2
78751	mmu-miR-291a-3p	Zc3h6	zinc finger CCCH type containing 6
11643	mmu-miR-763	Akap4	A kinase (PRKA) anchor protein 4
67020	mmu-miR-296-5p	Tmem88	transmembrane protein 88
21417	mmu-miR-883b-5p	Zeb1	zinc finger E-box binding homeobox 1
23849	mmu-miR-466a-5p	Klf6	Kruppel-like factor 6
28081	mmu-miR-466j	Fam104a	family with sequence similarity 104, member A
58799	mmu-miR-34b-5p	Crbn	cereblon
319642	mmu-miR-466h-5p	Rab9b	RAB9B, member RAS oncogene family
242481	mmu-miR-296-3p	Palm2	paralemmin 2
12567	mmu-miR-690	Cdk4	cyclin-dependent kinase 4
14924	mmu-miR-882	Magi1	membrane associated guanylate kinase, WW and PDZ domain containing 1
103098	mmu-miR-292a-3p	Slc6a15	solute carrier family 6 (neurotransmitter transporter), member 15
67886	mmu-miR-125a-3p	Camsap2	calmodulin regulated spectrin-associated protein family, member 2
101197	mmu-miR-466g	Zfp956	zinc finger protein 956
18145	mmu-miR-466h-5p	Npc1	Niemann-Pick type C1
244058	mmu-miR-760-3p	Rgma	repulsive guidance molecule family member A
66583	mmu-miR-292a-5p	Exosc1	exosome component 1
71914	mmu-miR-466j	Antxr2	anthrax toxin receptor 2
12504	mmu-miR-669a-5p	Cd4	CD4 antigen
170749	mmu-miR-290a-3p	Mtmr4	myotubularin related protein 4
14462	mmu-miR-34b-5p	Gata3	GATA binding protein 3
235604	mmu-miR-680	Camkv	CaM kinase-like vesicle-associated
67487	mmu-miR-423-5p	Dhx40	DEAH (Asp-Glu-Ala-His) box polypeptide 40
18386	mmu-miR-423-5p	Oprd1	opioid receptor, delta 1
235033	mmu-miR-770-3p	Rdh8	retinol dehydrogenase 8
56710	mmu-miR-34b-5p	Brinp1	bone morphogenic protein/retinoic acid inducible neural specific 1
210027	mmu-miR-883b-5p	Slc35f3	solute carrier family 35, member F3
14415	mmu-miR-423-5p	Gad1	glutamate decarboxylase 1
216543	mmu-miR-292a-5p	Cep68	centrosomal protein 68
16443	mmu-miR-466g	Itsn1	intersectin 1 (SH3 domain protein 1A)
53321	mmu-miR-763	Cntnap1	contactin associated protein-like 1
13992	mmu-miR-339-5p	Khdrbs3	KH domain containing, RNA binding, signal transduction associated 3
319996	mmu-miR-466h-5p	Casc4	cancer susceptibility candidate 4
74766	mmu-miR-339-5p	Yipf2	Yip1 domain family, member 2
77286	mmu-miR-199a-5p	Nkrf	NF-kappaB repressing factor
382571	mmu-miR-125a-5p	Kcnf1	potassium voltage-gated channel, subfamily F, member 1
20674	mmu-miR-207	Sox2	SRY (sex determining region Y)-box 2
76303	mmu-miR-125a-3p	Osbp	oxysterol binding protein
11538	mmu-miR-466h-5p	Adnp	activity-dependent neuroprotective protein
216873	mmu-miR-466i-3p	Spag7	sperm associated antigen 7
192174	mmu-miR-466a-5p	Rwdd4a	RWD domain containing 4A
21415	mmu-miR-423-5p	Tcf7l1	transcription factor 7 like 1 (T cell specific, HMG box)
51886	mmu-miR-466f-3p	Fubp1	far upstream element (FUSE) binding protein 1
16206	mmu-miR-290a-3p	Lrig1	leucine-rich repeats and immunoglobulin-like domains 1
70227	mmu-miR-335-3p	Zfp619	zinc finger protein 619
12927	mmu-miR-770-5p	Bcar1	breast cancer anti-estrogen resistance 1
230757	mmu-miR-466i-3p	5730409E04Rik	RIKEN cDNA 5730409E04Rik gene
56786	mmu-miR-466h-5p	Tmem9b	TMEM9 domain family, member B
12290	mmu-miR-207	Cacna1e	calcium channel, voltage-dependent, R type, alpha 1E subunit
320343	mmu-miR-466h-5p	Lypd6	LY6/PLAUR domain containing 6
13175	mmu-miR-1190	Dclk1	doublecortin-like kinase 1
104001	mmu-miR-882	Rtn1	reticulon 1
26877	mmu-miR-466d-3p	B3galt1	UDP-Gal:betaGlcNAc beta 1,3-galactosyltransferase, polypeptide 1
18738	mmu-miR-680	Pitpna	phosphatidylinositol transfer protein, alpha
75415	mmu-miR-467g	Arhgap12	Rho GTPase activating protein 12
27999	mmu-miR-686	Fam3c	family with sequence similarity 3, member C
320840	mmu-miR-466j	Negr1	neuronal growth regulator 1
230917	mmu-miR-686	Tmem201	transmembrane protein 201
121021	mmu-miR-680	Cspg4	chondroitin sulfate proteoglycan 4
226025	mmu-miR-582-5p	Trpm3	transient receptor potential cation channel, subfamily M, member 3
56809	mmu-miR-339-5p	Gmeb1	glucocorticoid modulatory element binding protein 1
66743	mmu-miR-466a-5p	Rnf220	ring finger protein 220
68724	mmu-miR-380-5p	Arl8a	ADP-ribosylation factor-like 8A
11881	mmu-miR-763	Arsb	arylsulfatase B
98258	mmu-miR-290a-3p	Txndc9	thioredoxin domain containing 9
217069	mmu-miR-466f-3p	Trim25	tripartite motif-containing 25
242509	mmu-miR-1187	Bnc2	basonuclin 2
320311	mmu-miR-466i-3p	Rnf152	ring finger protein 152
58212	mmu-miR-883b-5p	Srrm3	serine/arginine repetitive matrix 3
59289	mmu-miR-490-3p	Ackr2	atypical chemokine receptor 2
24050	mmu-miR-882	2016-09-03	septin 3
14784	mmu-miR-1190	Grb2	growth factor receptor bound protein 2
20269	mmu-miR-34b-5p	Scn3a	sodium channel, voltage-gated, type III, alpha
218975	mmu-miR-466i-3p	Mapk1ip1l	mitogen-activated protein kinase 1 interacting protein 1-like
59069	mmu-miR-540-3p	Tpm3	tropomyosin 3, gamma
66106	mmu-miR-129-5p	Smpx	small muscle protein, X-linked
230700	mmu-miR-466i-3p	Foxj3	forkhead box J3
16590	mmu-miR-467g	Kit	kit oncogene
30049	mmu-miR-1190	Scd3	stearoyl-coenzyme A desaturase 3
66626	mmu-miR-682	Cdip1	cell death inducing Trp53 target 1
67948	mmu-miR-679-5p	Fbxo28	F-box protein 28
216877	mmu-miR-125a-5p	Dhx33	DEAH (Asp-Glu-Ala-His) box polypeptide 33
78521	mmu-miR-1187	B230219D22Rik	RIKEN cDNA B230219D22 gene
232086	mmu-miR-423-5p	Tmem150a	transmembrane protein 150A
12512	mmu-miR-490-3p	Cd63	CD63 antigen
56309	mmu-miR-666-3p	Mycbp	MYC binding protein
105522	mmu-miR-290a-3p	Ankrd28	ankyrin repeat domain 28
230917	mmu-miR-199a-5p	Tmem201	transmembrane protein 201
68449	mmu-miR-671-3p	Tbc1d10b	TBC1 domain family, member 10b
77031	mmu-miR-484	Slc9a8	solute carrier family 9 (sodium/hydrogen exchanger), member 8
74342	mmu-miR-342-5p	Lrrtm1	leucine rich repeat transmembrane neuronal 1
76132	mmu-miR-669f-3p	Faxc	failed axon connections homolog
241944	mmu-miR-297b-5p	D3Ertd254e	DNA segment, Chr 3, ERATO Doi 254, expressed
238024	mmu-miR-682	Fn3krp	fructosamine 3 kinase related protein
14190	mmu-miR-199a-3p	Fgl2	fibrinogen-like protein 2
21929	mmu-miR-125b-5p	Tnfaip3	tumor necrosis factor, alpha-induced protein 3
233865	mmu-miR-296-5p	D430042O09Rik	RIKEN cDNA D430042O09 gene
75425	mmu-miR-188-5p	Tti1	TELO2 interacting protein 1
75415	mmu-miR-466i-3p	Arhgap12	Rho GTPase activating protein 12
18111	mmu-miR-296-5p	Nnat	neuronatin
71740	mmu-miR-296-3p	Pvrl4	poliovirus receptor-related 4
69718	mmu-miR-188-3p	Ipmk	inositol polyphosphate multikinase
26404	mmu-miR-335-3p	Map3k12	mitogen-activated protein kinase kinase kinase 12
52882	mmu-miR-125a-3p	Rgs7bp	regulator of G-protein signalling 7 binding protein
77578	mmu-miR-362-3p	Bcl9	B cell CLL/lymphoma 9
228880	mmu-miR-129-5p	Zmynd8	zinc finger, MYND-type containing 8
382985	mmu-miR-490-3p	Rrm2b	ribonucleotide reductase M2 B (TP53 inducible)
232217	mmu-miR-467f	4933427D06Rik	RIKEN cDNA 4933427D06 gene
66256	mmu-miR-296-5p	Ssr2	signal sequence receptor, beta
17354	mmu-miR-466j	Mllt10	myeloid/lymphoid or mixed-lineage leukemia; translocated to, 10
114255	mmu-miR-296-3p	Dok4	docking protein 4
14783	mmu-miR-484	Grb10	growth factor receptor bound protein 10
66540	mmu-miR-335-5p	Fam107b	family with sequence similarity 107, member B
72469	mmu-miR-423-5p	Plcd3	phospholipase C, delta 3
104570	mmu-miR-671-3p	Smek2	SMEK homolog 2, suppressor of mek1 (Dictyostelium)
14056	mmu-miR-763	Ezh2	enhancer of zeste 2 polycomb repressive complex 2 subunit
51886	mmu-miR-338-5p	Fubp1	far upstream element (FUSE) binding protein 1
67792	mmu-miR-151-3p	Rgs8	regulator of G-protein signaling 8
50786	mmu-miR-466h-5p	Hs6st2	heparan sulfate 6-O-sulfotransferase 2
380928	mmu-miR-335-3p	Lmo7	LIM domain only 7
15510	mmu-miR-125a-3p	Hspd1	heat shock protein 1 (chaperonin)
74356	mmu-miR-423-5p	4931428F04Rik	RIKEN cDNA 4931428F04 gene
76809	mmu-miR-450b-3p	Bri3bp	Bri3 binding protein
14190	mmu-miR-335-3p	Fgl2	fibrinogen-like protein 2
234371	mmu-miR-466i-3p	Tmem161a	transmembrane protein 161A
60599	mmu-miR-466i-3p	Trp53inp1	transformation related protein 53 inducible nuclear protein 1
11984	mmu-miR-770-3p	Atp6v0c	ATPase, H+ transporting, lysosomal V0 subunit C
19009	mmu-miR-292a-3p	Pou6f1	POU domain, class 6, transcription factor 1
14677	mmu-miR-501-3p	Gnai1	guanine nucleotide binding protein (G protein), alpha inhibiting 1
22418	mmu-miR-883b-5p	Wnt5a	wingless-type MMTV integration site family, member 5A
20269	mmu-miR-212-3p	Scn3a	sodium channel, voltage-gated, type III, alpha
69159	mmu-miR-490-3p	Rhebl1	Ras homolog enriched in brain like 1
26932	mmu-miR-666-3p	Ppp2r5e	protein phosphatase 2, regulatory subunit B', epsilon
11487	mmu-miR-142a-3p	Adam10	a disintegrin and metallopeptidase domain 10
11519	mmu-miR-34b-5p	Add2	adducin 2 (beta)
624866	mmu-miR-490-3p	Lekr1	leucine, glutamate and lysine rich 1
20937	mmu-miR-292a-3p	Suv39h1	suppressor of variegation 3-9 homolog 1 (Drosophila)
110962	mmu-miR-342-5p	Mbd6	methyl-CpG binding domain protein 6
15278	mmu-miR-292a-5p	Tfb2m	transcription factor B2, mitochondrial
226517	mmu-miR-339-5p	Smg7	Smg-7 homolog, nonsense mediated mRNA decay factor (C. elegans)
76308	mmu-miR-770-3p	Rab1b	RAB1B, member RAS oncogene family
231807	mmu-miR-763	BC037034	cDNA sequence BC037034
12445	mmu-miR-763	Ccnd3	cyclin D3
12227	mmu-miR-466j	Btg2	B cell translocation gene 2, anti-proliferative
18080	mmu-miR-125a-5p	Nin	ninein
74522	mmu-miR-770-5p	Morc2a	microrchidia 2A
327826	mmu-miR-871-5p	Frs2	fibroblast growth factor receptor substrate 2
270120	mmu-miR-466h-5p	Fat3	FAT atypical cadherin 3
70646	mmu-miR-466f-5p	Naa30	N(alpha)-acetyltransferase 30, NatC catalytic subunit
226499	mmu-miR-450b-3p	BC003331	cDNA sequence BC003331
59003	mmu-miR-345-3p	Maea	macrophage erythroblast attacher
66569	mmu-miR-362-3p	Gdpd1	glycerophosphodiester phosphodiesterase domain containing 1
53871	mmu-miR-291a-3p	Pkd2l2	polycystic kidney disease 2-like 2
83557	mmu-miR-125a-5p	Lin28a	lin-28 homolog A (C. elegans)
67143	mmu-miR-291a-5p	Ikzf5	IKAROS family zinc finger 5
15902	mmu-miR-713	Id2	inhibitor of DNA binding 2
59043	mmu-miR-666-3p	Wsb2	WD repeat and SOCS box-containing 2
109019	mmu-miR-125a-3p	Nabp1	nucleic acid binding protein 1
319832	mmu-miR-338-3p	Tmem229a	transmembrane protein 229A
21393	mmu-miR-532-3p	Tcap	titin-cap
269053	mmu-miR-882	Gpr152	G protein-coupled receptor 152
108857	mmu-miR-125a-3p	Ankhd1	ankyrin repeat and KH domain containing 1
269702	mmu-miR-466j	Mphosph9	M-phase phosphoprotein 9
12780	mmu-miR-760-3p	Abcc2	ATP-binding cassette, sub-family C (CFTR/MRP), member 2
12995	mmu-miR-882	Csnk2a1	casein kinase 2, alpha 1 polypeptide
11771	mmu-miR-296-5p	Ap2a1	adaptor-related protein complex 2, alpha 1 subunit
140917	mmu-miR-1187	Dclre1b	DNA cross-link repair 1B
26456	mmu-miR-770-3p	Sema4g	sema domain, immunoglobulin domain (Ig), transmembrane domain (TM) and short cytoplasmic domain, (semaphorin) 4G
12589	mmu-miR-883b-5p	Ift81	intraflagellar transport 81
241727	mmu-miR-324-5p	Snph	syntaphilin
22083	mmu-miR-770-5p	Ctr9	CTR9 homolog, Paf1/RNA polymerase II complex component
12048	mmu-miR-466g	Bcl2l1	BCL2-like 1
70650	mmu-miR-804	Zcchc8	zinc finger, CCHC domain containing 8
18700	mmu-miR-188-5p	Piga	phosphatidylinositol glycan anchor biosynthesis, class A
20353	mmu-miR-125a-5p	Sema4c	sema domain, immunoglobulin domain (Ig), transmembrane domain (TM) and short cytoplasmic domain, (semaphorin) 4C
17886	mmu-miR-199a-5p	Myh9	myosin, heavy polypeptide 9, non-muscle
53618	mmu-miR-1187	Fut8	fucosyltransferase 8
79560	mmu-miR-713	Ublcp1	ubiquitin-like domain containing CTD phosphatase 1
70911	mmu-miR-666-3p	Phyhipl	phytanoyl-CoA hydroxylase interacting protein-like
20338	mmu-miR-760-3p	Sel1l	sel-1 suppressor of lin-12-like (C. elegans)
16561	mmu-miR-212-3p	Kif1b	kinesin family member 1B
21917	mmu-miR-199a-5p	Tmpo	thymopoietin
434784	mmu-miR-882	Ldoc1	leucine zipper, down-regulated in cancer 1
112405	mmu-miR-542-3p	Egln1	egl-9 family hypoxia-inducible factor 1
230996	mmu-miR-423-5p	9430015G10Rik	RIKEN cDNA 9430015G10 gene
210356	mmu-miR-770-5p	Nckap5	NCK-associated protein 5
56791	mmu-miR-466d-3p	Ube2l6	ubiquitin-conjugating enzyme E2L 6
214162	mmu-miR-380-5p	Kmt2a	lysine (K)-specific methyltransferase 2A
16987	mmu-miR-297b-5p	Lss	lanosterol synthase
19724	mmu-miR-542-5p	Rfx1	regulatory factor X, 1 (influences HLA class II expression)
226418	mmu-miR-292a-5p	Yod1	YOD1 OTU deubiquitinating enzyme 1 homologue (S. cerevisiae)
56195	mmu-miR-290a-5p	Ptbp2	polypyrimidine tract binding protein 2
216963	mmu-miR-760-3p	Git1	G protein-coupled receptor kinase-interactor 1
330938	mmu-miR-34b-5p	Dixdc1	DIX domain containing 1
227867	mmu-miR-345-3p	Epc2	enhancer of polycomb homolog 2 (Drosophila)
235584	mmu-miR-770-3p	Dusp7	dual specificity phosphatase 7
75788	mmu-miR-363-3p	Smurf1	SMAD specific E3 ubiquitin protein ligase 1
19317	mmu-miR-669h-5p	Qk	quaking
241311	mmu-miR-871-5p	Zbtb34	zinc finger and BTB domain containing 34
208606	mmu-miR-466h-5p	Rsrc2	arginine/serine-rich coiled-coil 2
229782	mmu-miR-1187	Slc35a3	solute carrier family 35 (UDP-N-acetylglucosamine (UDP-GlcNAc) transporter), member 3
104263	mmu-miR-763	Kdm3a	lysine (K)-specific demethylase 3A
93871	mmu-miR-466d-3p	Brwd1	bromodomain and WD repeat domain containing 1
57441	mmu-miR-362-3p	Gmnn	geminin
20689	mmu-miR-713	Sall3	sal-like 3 (Drosophila)
239852	mmu-miR-125a-3p	Zpld1	zona pellucida like domain containing 1
54484	mmu-miR-466j	Mkrn1	makorin, ring finger protein, 1
216831	mmu-miR-679-5p	Arhgap44	Rho GTPase activating protein 44
108686	mmu-miR-883b-5p	Ccdc88a	coiled coil domain containing 88A
209966	mmu-miR-770-3p	Pgbd5	piggyBac transposable element derived 5
140488	mmu-miR-680	Igf2bp3	insulin-like growth factor 2 mRNA binding protein 3
109042	mmu-miR-291a-3p	Prkcdbp	protein kinase C, delta binding protein
11910	mmu-miR-760-3p	Atf3	activating transcription factor 3
18383	mmu-miR-212-3p	Tnfrsf11b	tumor necrosis factor receptor superfamily, member 11b (osteoprotegerin)
77809	mmu-miR-770-5p	Lrrc42	leucine rich repeat containing 42
230908	mmu-miR-292a-5p	Tardbp	TAR DNA binding protein
19347	mmu-miR-770-3p	Dennd5a	DENN/MADD domain containing 5A
18423	mmu-miR-466a-5p	Otx1	orthodenticle homeobox 1
68861	mmu-miR-490-3p	1190002N15Rik	RIKEN cDNA 1190002N15 gene
319179	mmu-miR-760-3p	Hist1h2be	histone cluster 1, H2be
26374	mmu-miR-666-3p	Rfwd2	ring finger and WD repeat domain 2
240614	mmu-miR-542-3p	Ranbp6	RAN binding protein 6
242409	mmu-miR-466a-5p	Tmem8b	transmembrane protein 8B
243931	mmu-miR-291a-3p	Tshz3	teashirt zinc finger family member 3
101095	mmu-miR-125a-5p	Zfp282	zinc finger protein 282
11479	mmu-miR-345-3p	Acvr1b	activin A receptor, type 1B
56741	mmu-miR-743b-3p	Igdcc4	immunoglobulin superfamily, DCC subclass, member 4
59040	mmu-miR-465b-5p	Rhot1	ras homolog family member T1
13682	mmu-miR-666-3p	Eif4a2	eukaryotic translation initiation factor 4A2
234593	mmu-miR-466i-3p	Ndrg4	N-myc downstream regulated gene 4
13821	mmu-miR-540-3p	Epb41l1	erythrocyte membrane protein band 4.1 like 1
99296	mmu-miR-466j	Hrh3	histamine receptor H3
67767	mmu-miR-666-3p	Jagn1	jagunal homolog 1
270669	mmu-miR-466j	Mbtps2	membrane-bound transcription factor peptidase, site 2
207615	mmu-miR-291a-3p	Wdr37	WD repeat domain 37
22174	mmu-miR-296-5p	Tyro3	TYRO3 protein tyrosine kinase 3
68969	mmu-miR-212-3p	Eif1b	eukaryotic translation initiation factor 1B
207375	mmu-miR-467f	Fam120c	family with sequence similarity 120, member C
103098	mmu-miR-290a-5p	Slc6a15	solute carrier family 6 (neurotransmitter transporter), member 15
264064	mmu-miR-713	Cdk8	cyclin-dependent kinase 8
53614	mmu-miR-34b-5p	Reck	reversion-inducing-cysteine-rich protein with kazal motifs
68652	mmu-miR-142a-3p	Tab2	TGF-beta activated kinase 1/MAP3K7 binding protein 2
108089	mmu-miR-582-5p	Rnf144a	ring finger protein 144A
242506	mmu-miR-331-5p	Frmd3	FERM domain containing 3
77697	mmu-miR-484	Mmab	methylmalonic aciduria (cobalamin deficiency) cblB type homolog (human)
79263	mmu-miR-702-3p	Trim39	tripartite motif-containing 39
69226	mmu-miR-760-3p	Snx24	sorting nexing 24
14816	mmu-miR-713	Grm1	glutamate receptor, metabotropic 1
216011	mmu-miR-484	Lrrc20	leucine rich repeat containing 20
94109	mmu-miR-466h-5p	Csmd1	CUB and Sushi multiple domains 1
17318	mmu-miR-125a-5p	Mid1	midline 1
22061	mmu-miR-125a-3p	Trp63	transformation related protein 63
23965	mmu-miR-465a-3p	Tenm3	teneurin transmembrane protein 3
18810	mmu-miR-680	Plec	plectin
192195	mmu-miR-466f-3p	Ash1l	ash1 (absent, small, or homeotic)-like (Drosophila)
14234	mmu-miR-760-3p	Foxc2	forkhead box C2
11994	mmu-miR-763	Pcdh15	protocadherin 15
94109	mmu-miR-466j	Csmd1	CUB and Sushi multiple domains 1
16400	mmu-miR-199a-3p	Itga3	integrin alpha 3
17828	mmu-miR-882	Bloc1s5	biogenesis of lysosomal organelles complex-1, subunit 5, muted
55946	mmu-miR-1190	Ap3m1	adaptor-related protein complex 3, mu 1 subunit
330941	mmu-miR-686	AI593442	expressed sequence AI593442
67088	mmu-miR-770-3p	Cand2	cullin-associated and neddylation-dissociated 2 (putative)
474156	mmu-miR-125a-5p	Zbtb9	zinc finger and BTB domain containing 9
23922	mmu-miR-291a-3p	Jtb	jumping translocation breakpoint
270190	mmu-miR-291a-5p	Ephb1	Eph receptor B1
211712	mmu-miR-466h-5p	Pcdh9	protocadherin 9
11928	mmu-miR-324-5p	Atp1a1	ATPase, Na+/K+ transporting, alpha 1 polypeptide
14815	mmu-miR-1190	Nr3c1	nuclear receptor subfamily 3, group C, member 1
11303	mmu-miR-291a-5p	Abca1	ATP-binding cassette, sub-family A (ABC1), member 1
18129	mmu-miR-466j	Notch2	notch 2
11432	mmu-miR-199a-5p	Acp2	acid phosphatase 2, lysosomal
20502	mmu-miR-450b-3p	Slc16a2	solute carrier family 16 (monocarboxylic acid transporters), member 2
233115	mmu-miR-760-3p	Dpy19l3	dpy-19-like 3 (C. elegans)
28081	mmu-miR-466h-5p	Fam104a	family with sequence similarity 104, member A
18643	mmu-miR-1187	Pfn1	profilin 1
11909	mmu-miR-125a-3p	Atf2	activating transcription factor 2
140792	mmu-miR-1187	Colec12	collectin sub-family member 12
211914	mmu-miR-331-5p	Asap2	ArfGAP with SH3 domain, ankyrin repeat and PH domain 2
109052	mmu-miR-339-5p	Krt75	keratin 75
225659	mmu-miR-687	Cep76	centrosomal protein 76
21415	mmu-miR-34b-5p	Tcf7l1	transcription factor 7 like 1 (T cell specific, HMG box)
20614	mmu-miR-883b-5p	Snap25	synaptosomal-associated protein 25
18023	mmu-miR-423-3p	Nfe2l1	nuclear factor, erythroid derived 2,-like 1
16362	mmu-miR-423-3p	Irf1	interferon regulatory factor 1
74201	mmu-miR-669f-3p	Cep97	centrosomal protein 97
68146	mmu-miR-465b-5p	Arl13b	ADP-ribosylation factor-like 13B
17118	mmu-miR-380-5p	Marcks	myristoylated alanine rich protein kinase C substrate
56188	mmu-miR-125a-3p	Fxyd1	FXYD domain-containing ion transport regulator 1
84092	mmu-miR-484	Usp8	ubiquitin specific peptidase 8
76800	mmu-miR-207	Usp42	ubiquitin specific peptidase 42
27397	mmu-miR-466c-5p	Mrpl17	mitochondrial ribosomal protein L17
212986	mmu-miR-763	Scfd2	Sec1 family domain containing 2
71538	mmu-miR-1187	Fbxo9	f-box protein 9
76183	mmu-miR-339-5p	Celf6	CUGBP, Elav-like family member 6
22330	mmu-miR-680	Vcl	vinculin
16764	mmu-miR-362-3p	Aff3	AF4/FMR2 family, member 3
22319	mmu-miR-199a-3p	Vamp3	vesicle-associated membrane protein 3
319924	mmu-miR-290a-5p	Apba1	amyloid beta (A4) precursor protein binding, family A, member 1
277343	mmu-miR-669a-5p	Wfdc8	WAP four-disulfide core domain 8
330474	mmu-miR-770-5p	Zc3h4	zinc finger CCCH-type containing 4
18131	mmu-miR-679-5p	Notch3	notch 3
77733	mmu-miR-292a-3p	Rnf170	ring finger protein 170
69274	mmu-miR-540-3p	Ctdspl	CTD (carboxy-terminal domain, RNA polymerase II, polypeptide A) small phosphatase-like
20257	mmu-miR-423-5p	Stmn2	stathmin-like 2
68817	mmu-miR-188-3p	Ddi2	DNA-damage inducible protein 2
74125	mmu-miR-466h-5p	Armc8	armadillo repeat containing 8
214968	mmu-miR-291a-5p	Sema6d	sema domain, transmembrane domain (TM), and cytoplasmic domain, (semaphorin) 6D
217119	mmu-miR-713	Xylt2	xylosyltransferase II
30878	mmu-miR-760-3p	Apln	apelin
13435	mmu-miR-290a-3p	Dnmt3a	DNA methyltransferase 3A
56389	mmu-miR-666-3p	Stx5a	syntaxin 5A
50771	mmu-miR-1190	Atp9b	ATPase, class II, type 9B
217335	mmu-miR-207	Fbf1	Fas (TNFRSF6) binding factor 1
14105	mmu-miR-409-3p	Srsf10	serine/arginine-rich splicing factor 10
233490	mmu-miR-188-3p	Crebzf	CREB/ATF bZIP transcription factor
53417	mmu-miR-883a-5p	Hif3a	hypoxia inducible factor 3, alpha subunit
99633	mmu-miR-679-5p	Adgrl2	adhesion G protein-coupled receptor L2
244238	mmu-miR-188-5p	Mrgpre	MAS-related GPR, member E
245526	mmu-miR-339-5p	Pgr15l	G protein-coupled receptor 15-like
80914	mmu-miR-1187	Uck2	uridine-cytidine kinase 2
140486	mmu-miR-466j	Igf2bp1	insulin-like growth factor 2 mRNA binding protein 1
110417	mmu-miR-466a-5p	Pigh	phosphatidylinositol glycan anchor biosynthesis, class H
11855	mmu-miR-542-3p	Arhgap5	Rho GTPase activating protein 5
104099	mmu-miR-883a-5p	Itga9	integrin alpha 9
239857	mmu-miR-125a-3p	Cadm2	cell adhesion molecule 2
11641	mmu-miR-466j	Akap2	A kinase (PRKA) anchor protein 2
14601	mmu-miR-540-3p	Ghrh	growth hormone releasing hormone
27407	mmu-miR-763	Abcf2	ATP-binding cassette, sub-family F (GCN20), member 2
56284	mmu-miR-466h-5p	Mrpl19	mitochondrial ribosomal protein L19
20135	mmu-miR-292a-3p	Rrm2	ribonucleotide reductase M2
12890	mmu-miR-207	Cplx2	complexin 2
18223	mmu-miR-207	Numbl	numb-like
22317	mmu-miR-188-3p	Vamp1	vesicle-associated membrane protein 1
237759	mmu-miR-125a-3p	Col23a1	collagen, type XXIII, alpha 1
66756	mmu-miR-666-3p	Cfap97	cilia and flagella associated protein 97
66860	mmu-miR-290a-5p	Tanc1	tetratricopeptide repeat, ankyrin repeat and coiled-coil containing 1
26921	mmu-miR-423-5p	Map4k4	mitogen-activated protein kinase kinase kinase kinase 4
74513	mmu-miR-292a-3p	Neto2	neuropilin (NRP) and tolloid (TLL)-like 2
12753	mmu-miR-291a-3p	Clock	circadian locomotor output cycles kaput
13392	mmu-miR-883a-5p	Dlx2	distal-less homeobox 2
15572	mmu-miR-409-3p	Elavl4	ELAV (embryonic lethal, abnormal vision, Drosophila)-like 4 (Hu antigen D)
226982	mmu-miR-292a-3p	Eif5b	eukaryotic translation initiation factor 5B
217219	mmu-miR-207	Fam171a2	family with sequence similarity 171, member A2
103136	mmu-miR-188-5p	Pwp1	PWP1 homolog, endonuclein
69757	mmu-miR-335-3p	Leng1	leukocyte receptor cluster (LRC) member 1
240590	mmu-miR-763	Dmrt3	doublesex and mab-3 related transcription factor 3
54375	mmu-miR-291a-5p	Azin1	antizyme inhibitor 1
17988	mmu-miR-199a-3p	Ndrg1	N-myc downstream regulated gene 1
214084	mmu-miR-690	Slc18a2	solute carrier family 18 (vesicular monoamine), member 2
223601	mmu-miR-679-5p	Fam49b	family with sequence similarity 49, member B
66540	mmu-miR-760-3p	Fam107b	family with sequence similarity 107, member B
233046	mmu-miR-423-5p	Rasgrp4	RAS guanyl releasing protein 4
208943	mmu-miR-450b-3p	Myo5c	myosin VC
15081	mmu-miR-669a-5p	H3f3b	H3 histone, family 3B
108011	mmu-miR-465b-5p	Ap4e1	adaptor-related protein complex AP-4, epsilon 1
234582	mmu-miR-484	Ccdc102a	coiled-coil domain containing 102A
329628	mmu-miR-34b-5p	Fat4	FAT atypical cadherin 4
76025	mmu-miR-34b-5p	Cant1	calcium activated nucleotidase 1
242785	mmu-miR-669f-3p	Klhl21	kelch-like 21
20850	mmu-miR-324-5p	Stat5a	signal transducer and activator of transcription 5A
17920	mmu-miR-125a-5p	Myo6	myosin VI
319996	mmu-miR-188-5p	Casc4	cancer susceptibility candidate 4
20937	mmu-miR-680	Suv39h1	suppressor of variegation 3-9 homolog 1 (Drosophila)
12934	mmu-miR-679-5p	Dpysl2	dihydropyrimidinase-like 2
12209	mmu-miR-296-5p	Brs3	bombesin-like receptor 3
17765	mmu-miR-1190	Mtf2	metal response element binding transcription factor 2
244421	mmu-miR-466b-3p	Lonrf1	LON peptidase N-terminal domain and ring finger 1
245109	mmu-miR-466f-3p	Zscan4c	zinc finger and SCAN domain containing 4C
72949	mmu-miR-292a-3p	Ccnt2	cyclin T2
26413	mmu-miR-666-3p	Mapk1	mitogen-activated protein kinase 1
319189	mmu-miR-760-3p	Hist2h2bb	histone cluster 2, H2bb
216227	mmu-miR-1190	Slc17a8	solute carrier family 17 (sodium-dependent inorganic phosphate cotransporter), member 8
53883	mmu-miR-290a-3p	Celsr2	cadherin, EGF LAG seven-pass G-type receptor 2
56758	mmu-miR-466h-5p	Mbnl1	muscleblind-like 1 (Drosophila)
170742	mmu-miR-125b-5p	Sertad3	SERTA domain containing 3
16194	mmu-miR-34b-5p	Il6ra	interleukin 6 receptor, alpha
11491	mmu-miR-466d-3p	Adam17	a disintegrin and metallopeptidase domain 17
207182	mmu-miR-324-5p	Ggt7	gamma-glutamyltransferase 7
17965	mmu-miR-763	Nbl1	neuroblastoma, suppression of tumorigenicity 1
234362	mmu-miR-207	Zfp868	zinc finger protein 868
215814	mmu-miR-763	Ccdc28a	coiled-coil domain containing 28A
15568	mmu-miR-291a-5p	Elavl1	ELAV (embryonic lethal, abnormal vision)-like 1 (Hu antigen R)
15278	mmu-miR-466j	Tfb2m	transcription factor B2, mitochondrial
83925	mmu-miR-291a-5p	Trps1	trichorhinophalangeal syndrome I (human)
18534	mmu-miR-669f-3p	Pck1	phosphoenolpyruvate carboxykinase 1, cytosolic
229663	mmu-miR-770-5p	Csde1	cold shock domain containing E1, RNA binding
14394	mmu-miR-717	Gabra1	gamma-aminobutyric acid (GABA) A receptor, subunit alpha 1
216344	mmu-miR-291a-5p	Rab21	RAB21, member RAS oncogene family
56289	mmu-miR-760-3p	Rassf1	Ras association (RalGDS/AF-6) domain family member 1
14886	mmu-miR-669h-5p	Gtf2i	general transcription factor II I
70821	mmu-miR-760-3p	4921507P07Rik	RIKEN cDNA 4921507P07 gene
54219	mmu-miR-484	Cd320	CD320 antigen
71452	mmu-miR-770-3p	Ankrd40	ankyrin repeat domain 40
269784	mmu-miR-340-5p	Cntn4	contactin 4
231070	mmu-miR-345-3p	Insig1	insulin induced gene 1
226518	mmu-miR-702-3p	Nmnat2	nicotinamide nucleotide adenylyltransferase 2
244585	mmu-miR-686	Rpgrip1l	Rpgrip1-like
21825	mmu-miR-207	Thbs1	thrombospondin 1
56786	mmu-miR-883b-5p	Tmem9b	TMEM9 domain family, member B
76742	mmu-miR-466j	Snx27	sorting nexin family member 27
56491	mmu-miR-466j	Vapb	vesicle-associated membrane protein, associated protein B and C
20274	mmu-miR-466i-3p	Scn9a	sodium channel, voltage-gated, type IX, alpha
381157	mmu-miR-363-3p	Greb1l	growth regulation by estrogen in breast cancer-like
19088	mmu-miR-679-5p	Prkar2b	protein kinase, cAMP dependent regulatory, type II beta
18813	mmu-miR-342-5p	Pa2g4	proliferation-associated 2G4
107589	mmu-miR-292a-3p	Mylk	myosin, light polypeptide kinase
12298	mmu-miR-763	Cacnb4	calcium channel, voltage-dependent, beta 4 subunit
93707	mmu-miR-296-5p	Pcdhgc4	protocadherin gamma subfamily C, 4
69024	mmu-miR-34b-5p	Snx15	sorting nexin 15
20184	mmu-miR-340-5p	Uimc1	ubiquitin interaction motif containing 1
320492	mmu-miR-331-5p	A830018L16Rik	RIKEN cDNA A830018L16 gene
16010	mmu-miR-717	Igfbp4	insulin-like growth factor binding protein 4
207785	mmu-miR-770-5p	Csrnp2	cysteine-serine-rich nuclear protein 2
227357	mmu-miR-125a-3p	Espnl	espin-like
26379	mmu-miR-125b-5p	Esrra	estrogen related receptor, alpha
70428	mmu-miR-296-3p	Polr3b	polymerase (RNA) III (DNA directed) polypeptide B
69568	mmu-miR-423-3p	Vkorc1l1	vitamin K epoxide reductase complex, subunit 1-like 1
13164	mmu-miR-679-5p	Dazl	deleted in azoospermia-like
16918	mmu-miR-501-3p	Mycl	v-myc avian myelocytomatosis viral oncogene lung carcinoma derived
72745	mmu-miR-466f-3p	Tmem161b	transmembrane protein 161B
18787	mmu-miR-804	Serpine1	serine (or cysteine) peptidase inhibitor, clade E, member 1
14007	mmu-miR-669h-5p	Celf2	CUGBP, Elav-like family member 2
192212	mmu-miR-882	Prom2	prominin 2
18087	mmu-miR-542-3p	Nktr	natural killer tumor recognition sequence
74522	mmu-miR-760-3p	Morc2a	microrchidia 2A
50709	mmu-miR-760-3p	Hist1h1e	histone cluster 1, H1e
67453	mmu-miR-466i-3p	Slc25a46	solute carrier family 25, member 46
13052	mmu-miR-409-3p	Cxadr	coxsackie virus and adenovirus receptor
108946	mmu-miR-466f-3p	Zzz3	zinc finger, ZZ domain containing 3
15360	mmu-miR-345-3p	Hmgcs2	3-hydroxy-3-methylglutaryl-Coenzyme A synthase 2
208968	mmu-miR-770-3p	Zfp280c	zinc finger protein 280C
18935	mmu-miR-125a-3p	Phox2b	paired-like homeobox 2b
208967	mmu-miR-409-3p	Thnsl1	threonine synthase-like 1 (bacterial)
11987	mmu-miR-882	Slc7a1	solute carrier family 7 (cationic amino acid transporter, y+ system), member 1
72567	mmu-miR-466c-5p	Bclaf1	BCL2-associated transcription factor 1
58521	mmu-miR-212-3p	Eid1	EP300 interacting inhibitor of differentiation 1
72049	mmu-miR-871-5p	Tnfrsf13c	tumor necrosis factor receptor superfamily, member 13c
16570	mmu-miR-669h-3p	Kif3c	kinesin family member 3C
20195	mmu-miR-129-5p	S100a11	S100 calcium binding protein A11
116940	mmu-miR-290a-5p	Tgs1	trimethylguanosine synthase 1
70620	mmu-miR-669h-5p	Ube2v2	ubiquitin-conjugating enzyme E2 variant 2
54446	mmu-miR-713	Nfat5	nuclear factor of activated T cells 5
242505	mmu-miR-871-5p	Rasef	RAS and EF hand domain containing
237542	mmu-miR-466f-3p	Osbpl8	oxysterol binding protein-like 8
13839	mmu-miR-466f-3p	Epha5	Eph receptor A5
382083	mmu-miR-680	Snx22	sorting nexin 22
12325	mmu-miR-760-3p	Camk2g	calcium/calmodulin-dependent protein kinase II gamma
12921	mmu-miR-34b-5p	Crhr1	corticotropin releasing hormone receptor 1
74868	mmu-miR-770-5p	Tmem65	transmembrane protein 65
109904	mmu-miR-423-5p	Mcf2	mcf.2 transforming sequence
13435	mmu-miR-292a-3p	Dnmt3a	DNA methyltransferase 3A
16416	mmu-miR-466i-3p	Itgb3	integrin beta 3
59092	mmu-miR-296-5p	Pcbp4	poly(rC) binding protein 4
268980	mmu-miR-292a-5p	Strn	striatin, calmodulin binding protein
11783	mmu-miR-490-3p	Apaf1	apoptotic peptidase activating factor 1
56258	mmu-miR-883a-5p	Hnrnph2	heterogeneous nuclear ribonucleoprotein H2
12890	mmu-miR-466a-5p	Cplx2	complexin 2
269061	mmu-miR-883b-5p	Cpsf7	cleavage and polyadenylation specific factor 7
66404	mmu-miR-450b-3p	Rtfdc1	replication termination factor 2 domain containing 1
20299	mmu-miR-34b-5p	Ccl22	chemokine (C-C motif) ligand 22
56322	mmu-miR-770-5p	Timm22	translocase of inner mitochondrial membrane 22
73469	mmu-miR-466b-3p	Rnf38	ring finger protein 38
70790	mmu-miR-292a-3p	Ubr5	ubiquitin protein ligase E3 component n-recognin 5
11906	mmu-miR-466i-3p	Zfhx3	zinc finger homeobox 3
67040	mmu-miR-290a-5p	Ddx17	DEAD (Asp-Glu-Ala-Asp) box polypeptide 17
15117	mmu-miR-338-3p	Has2	hyaluronan synthase 2
21349	mmu-miR-669f-3p	Tal1	T cell acute lymphocytic leukemia 1
93722	mmu-miR-296-5p	Pcdhga10	protocadherin gamma subfamily A, 10
235044	mmu-miR-702-3p	Plppr2	phospholipid phosphatase related 2
19877	mmu-miR-207	Rock1	Rho-associated coiled-coil containing protein kinase 1
18647	mmu-miR-883a-5p	Cdk14	cyclin-dependent kinase 14
207474	mmu-miR-804	Kctd12b	potassium channel tetramerisation domain containing 12b
70533	mmu-miR-467g	Btf3l4	basic transcription factor 3-like 4
331063	mmu-miR-702-3p	Gsdmc2	gasdermin C2
20747	mmu-miR-129-5p	Spop	speckle-type POZ protein
21429	mmu-miR-882	Ubtf	upstream binding transcription factor, RNA polymerase I
52468	mmu-miR-680	Ctdsp2	CTD (carboxy-terminal domain, RNA polymerase II, polypeptide A) small phosphatase 2
11931	mmu-miR-882	Atp1b1	ATPase, Na+/K+ transporting, beta 1 polypeptide
14696	mmu-miR-296-3p	Gnb4	guanine nucleotide binding protein (G protein), beta 4
12151	mmu-miR-465a-3p	Bmi1	Bmi1 polycomb ring finger oncogene
27276	mmu-miR-882	Plekhb1	pleckstrin homology domain containing, family B (evectins) member 1
319263	mmu-miR-690	Pcmtd1	protein-L-isoaspartate (D-aspartate) O-methyltransferase domain containing 1
227731	mmu-miR-484	Slc25a25	solute carrier family 25 (mitochondrial carrier, phosphate carrier), member 25
58208	mmu-miR-345-3p	Bcl11b	B cell leukemia/lymphoma 11B
71914	mmu-miR-466h-5p	Antxr2	anthrax toxin receptor 2
13797	mmu-miR-296-3p	Emx2	empty spiracles homeobox 2
50790	mmu-miR-207	Acsl4	acyl-CoA synthetase long-chain family member 4
170930	mmu-miR-466j	Sumo2	small ubiquitin-like modifier 2
20970	mmu-miR-760-3p	Sdc3	syndecan 3
66874	mmu-miR-679-5p	Ncbp3	nuclear cap binding subunit 3
70911	mmu-miR-679-5p	Phyhipl	phytanoyl-CoA hydroxylase interacting protein-like
12395	mmu-miR-686	Runx1t1	runt-related transcription factor 1; translocated to, 1 (cyclin D-related)
16526	mmu-miR-484	Kcnk2	potassium channel, subfamily K, member 2
11800	mmu-miR-1190	Api5	apoptosis inhibitor 5
231712	mmu-miR-129-2-3p	Trafd1	TRAF type zinc finger domain containing 1
67991	mmu-miR-466b-3p	Nacc2	nucleus accumbens associated 2, BEN and BTB (POZ) domain containing
18187	mmu-miR-882	Nrp2	neuropilin 2
78919	mmu-miR-339-5p	Fndc8	fibronectin type III domain containing 8
214133	mmu-miR-423-5p	Tet2	tet methylcytosine dioxygenase 2
242860	mmu-miR-466f-3p	Rsbn1l	round spermatid basic protein 1-like
12151	mmu-miR-686	Bmi1	Bmi1 polycomb ring finger oncogene
16508	mmu-miR-466j	Kcnd2	potassium voltage-gated channel, Shal-related family, member 2
69654	mmu-miR-532-3p	Dctn2	dynactin 2
109676	mmu-miR-292a-3p	Ank2	ankyrin 2, brain
15931	mmu-miR-467f	Ids	iduronate 2-sulfatase
65945	mmu-miR-711	Clstn1	calsyntenin 1
16561	mmu-miR-466h-5p	Kif1b	kinesin family member 1B
68089	mmu-miR-702-3p	Arpc4	actin related protein 2/3 complex, subunit 4
13405	mmu-miR-362-5p	Dmd	dystrophin, muscular dystrophy
16206	mmu-miR-292a-3p	Lrig1	leucine-rich repeats and immunoglobulin-like domains 1
12313	mmu-miR-666-3p	Calm1	calmodulin 1
80902	mmu-miR-188-5p	Zfp202	zinc finger protein 202
20476	mmu-miR-669h-3p	Six6	sine oculis-related homeobox 6
21415	mmu-miR-882	Tcf7l1	transcription factor 7 like 1 (T cell specific, HMG box)
102448	mmu-miR-882	Xylb	xylulokinase homolog (H. influenzae)
69538	mmu-miR-883a-5p	Antxr1	anthrax toxin receptor 1
211612	mmu-miR-297b-5p	Ptchd1	patched domain containing 1
223473	mmu-miR-151-3p	Nipal2	NIPA-like domain containing 2
235323	mmu-miR-362-5p	Usp28	ubiquitin specific peptidase 28
214459	mmu-miR-770-5p	Fnbp1l	formin binding protein 1-like
53321	mmu-miR-296-3p	Cntnap1	contactin associated protein-like 1
238076	mmu-miR-125a-5p	Kcns3	potassium voltage-gated channel, delayed-rectifier, subfamily S, member 3
225363	mmu-miR-296-3p	Etf1	eukaryotic translation termination factor 1
72886	mmu-miR-342-5p	Ccdc94	coiled-coil domain containing 94
12751	mmu-miR-882	Tpp1	tripeptidyl peptidase I
70533	mmu-miR-882	Btf3l4	basic transcription factor 3-like 4
72195	mmu-miR-1187	Supt7l	suppressor of Ty 7-like
18196	mmu-miR-199a-5p	Nsg1	neuron specific gene family member 1
68815	mmu-miR-770-3p	Btbd10	BTB (POZ) domain containing 10
328110	mmu-miR-129-2-3p	Prpf39	pre-mRNA processing factor 39
17974	mmu-miR-297b-5p	Nck2	non-catalytic region of tyrosine kinase adaptor protein 2
22433	mmu-miR-763	Xbp1	X-box binding protein 1
21402	mmu-miR-883a-5p	Skp1a	S-phase kinase-associated protein 1A
97287	mmu-miR-125a-3p	Mtmr14	myotubularin related protein 14
75746	mmu-miR-770-5p	Morc4	microrchidia 4
666704	mmu-miR-345-3p	Samd1	sterile alpha motif domain containing 1
66691	mmu-miR-423-3p	Gapvd1	GTPase activating protein and VPS9 domains 1
12918	mmu-miR-466h-5p	Crh	corticotropin releasing hormone
78757	mmu-miR-582-5p	Rictor	RPTOR independent companion of MTOR, complex 2
56046	mmu-miR-883b-5p	Uqcc1	ubiquinol-cytochrome c reductase complex assembly factor 1
77116	mmu-miR-883b-5p	Mtmr2	myotubularin related protein 2
71409	mmu-miR-465a-3p	Fmnl2	formin-like 2
55946	mmu-miR-679-5p	Ap3m1	adaptor-related protein complex 3, mu 1 subunit
107435	mmu-miR-770-5p	Hat1	histone aminotransferase 1
207165	mmu-miR-669a-5p	Bptf	bromodomain PHD finger transcription factor
66799	mmu-miR-363-3p	Ube2w	ubiquitin-conjugating enzyme E2W (putative)
218975	mmu-miR-125a-3p	Mapk1ip1l	mitogen-activated protein kinase 1 interacting protein 1-like
229714	mmu-miR-339-5p	Gpr61	G protein-coupled receptor 61
24050	mmu-miR-324-5p	2016-09-03	septin 3
53611	mmu-miR-669f-3p	Vti1a	vesicle transport through interaction with t-SNAREs 1A
18390	mmu-miR-680	Oprm1	opioid receptor, mu 1
69743	mmu-miR-125a-3p	Casz1	castor zinc finger 1
78688	mmu-miR-450b-3p	Nol3	nucleolar protein 3 (apoptosis repressor with CARD domain)
237073	mmu-miR-713	Rbm41	RNA binding motif protein 41
209224	mmu-miR-1187	Enox2	ecto-NOX disulfide-thiol exchanger 2
140919	mmu-miR-292a-3p	Slc17a6	solute carrier family 17 (sodium-dependent inorganic phosphate cotransporter), member 6
243931	mmu-miR-1190	Tshz3	teashirt zinc finger family member 3
20588	mmu-miR-532-3p	Smarcc1	SWI/SNF related, matrix associated, actin dependent regulator of chromatin, subfamily c, member 1
105853	mmu-miR-142a-5p	Mal2	mal, T cell differentiation protein 2
18768	mmu-miR-466f-3p	Pkib	protein kinase inhibitor beta, cAMP dependent, testis specific
20356	mmu-miR-743b-3p	Sema5a	sema domain, seven thrombospondin repeats (type 1 and type 1-like), transmembrane domain (TM) and short cytoplasmic domain, (semaphorin) 5A
667370	mmu-miR-466f-3p	Ifit3b	interferon-induced protein with tetratricopeptide repeats 3B
19281	mmu-miR-423-5p	Ptprt	protein tyrosine phosphatase, receptor type, T
108116	mmu-miR-125a-3p	Slco3a1	solute carrier organic anion transporter family, member 3a1
20855	mmu-miR-423-5p	Stc1	stanniocalcin 1
21834	mmu-miR-666-3p	Thrb	thyroid hormone receptor beta
19119	mmu-miR-125a-3p	Prm2	protamine 2
68801	mmu-miR-467g	Elovl5	ELOVL family member 5, elongation of long chain fatty acids (yeast)
381293	mmu-miR-882	Kif14	kinesin family member 14
67181	mmu-miR-423-5p	Ctdnep1	CTD nuclear envelope phosphatase 1
217303	mmu-miR-871-5p	Cd300a	CD300A antigen
18049	mmu-miR-423-5p	Ngf	nerve growth factor
50789	mmu-miR-686	Fbxl3	F-box and leucine-rich repeat protein 3
52609	mmu-miR-466j	Cbx7	chromobox 7
108927	mmu-miR-466c-5p	Lhfp	lipoma HMGIC fusion partner
22439	mmu-miR-669a-5p	Xk	X-linked Kx blood group
83491	mmu-miR-291a-5p	Pramel1	preferentially expressed antigen in melanoma-like 1
18109	mmu-miR-291a-5p	Mycn	v-myc avian myelocytomatosis viral related oncogene, neuroblastoma derived
231474	mmu-miR-297b-5p	Paqr3	progestin and adipoQ receptor family member III
109050	mmu-miR-466i-3p	Fam212b	family with sequence similarity 212, member B
208691	mmu-miR-450b-3p	Eif5a2	eukaryotic translation initiation factor 5A2
212398	mmu-miR-615-3p	Frat2	frequently rearranged in advanced T cell lymphomas 2
17918	mmu-miR-380-5p	Myo5a	myosin VA
108961	mmu-miR-296-3p	E2f8	E2F transcription factor 8
16468	mmu-miR-671-3p	Jarid2	jumonji, AT rich interactive domain 2
69608	mmu-miR-331-5p	Sec24d	Sec24 related gene family, member D (S. cerevisiae)
59025	mmu-miR-450b-5p	Usp14	ubiquitin specific peptidase 14
13653	mmu-miR-1190	Egr1	early growth response 1
50868	mmu-miR-339-5p	Keap1	kelch-like ECH-associated protein 1
213498	mmu-miR-669f-3p	Arhgef11	Rho guanine nucleotide exchange factor (GEF) 11
269870	mmu-miR-713	Zfp446	zinc finger protein 446
18491	mmu-miR-882	Pappa	pregnancy-associated plasma protein A
270328	mmu-miR-702-3p	Gsdmc3	gasdermin C3
74998	mmu-miR-763	Rab11fip2	RAB11 family interacting protein 2 (class I)
16987	mmu-miR-466a-5p	Lss	lanosterol synthase
68215	mmu-miR-686	Fam98b	family with sequence similarity 98, member B
23849	mmu-miR-466i-3p	Klf6	Kruppel-like factor 6
240726	mmu-miR-409-3p	Slco5a1	solute carrier organic anion transporter family, member 5A1
211922	mmu-miR-125a-5p	Dennd6a	DENN/MADD domain containing 6A
67602	mmu-miR-212-3p	Necap1	NECAP endocytosis associated 1
56726	mmu-miR-129-5p	Sh3bgrl	SH3-binding domain glutamic acid-rich protein like
57775	mmu-miR-466f-3p	Usp29	ubiquitin specific peptidase 29
245666	mmu-miR-743b-3p	Iqsec2	IQ motif and Sec7 domain 2
14238	mmu-miR-466f-3p	Foxf2	forkhead box F2
70790	mmu-miR-466i-3p	Ubr5	ubiquitin protein ligase E3 component n-recognin 5
327826	mmu-miR-466b-3p	Frs2	fibroblast growth factor receptor substrate 2
12416	mmu-miR-883a-5p	Cbx2	chromobox 2
105445	mmu-miR-409-3p	Dock9	dedicator of cytokinesis 9
18185	mmu-miR-207	Nrl	neural retina leucine zipper gene
232086	mmu-miR-760-3p	Tmem150a	transmembrane protein 150A
66873	mmu-miR-125a-5p	Tril	TLR4 interactor with leucine-rich repeats
53328	mmu-miR-450b-5p	Pgrmc1	progesterone receptor membrane component 1
76901	mmu-miR-207	Jade2	jade family PHD finger 2
66183	mmu-miR-331-5p	Sptssb	serine palmitoyltransferase, small subunit B
72413	mmu-miR-188-3p	Kcnmb2	potassium large conductance calcium-activated channel, subfamily M, beta member 2
329777	mmu-miR-666-3p	Pigk	phosphatidylinositol glycan anchor biosynthesis, class K
69807	mmu-miR-188-3p	Trim32	tripartite motif-containing 32
76795	mmu-miR-342-5p	Tbc1d9b	TBC1 domain family, member 9B
74156	mmu-miR-290a-5p	Acot12	acyl-CoA thioesterase 12
224807	mmu-miR-423-5p	Tmem63b	transmembrane protein 63b
70078	mmu-miR-291a-3p	Nol7	nucleolar protein 7
99738	mmu-miR-540-3p	Kcnc4	potassium voltage gated channel, Shaw-related subfamily, member 4
52822	mmu-miR-291a-5p	Rufy3	RUN and FYVE domain containing 3
17428	mmu-miR-296-3p	Mnt	max binding protein
108755	mmu-miR-466j	Lyrm2	LYR motif containing 2
16998	mmu-miR-540-3p	Ltbp3	latent transforming growth factor beta binding protein 3
319508	mmu-miR-804	Syt15	synaptotagmin XV
72309	mmu-miR-702-3p	Tmem158	transmembrane protein 158
268297	mmu-miR-362-3p	Scml4	sex comb on midleg-like 4 (Drosophila)
108062	mmu-miR-199a-5p	Cstf2	cleavage stimulation factor, 3' pre-RNA subunit 2
66511	mmu-miR-296-3p	Chtop	chromatin target of PRMT1
26946	mmu-miR-669a-5p	Trpc7	transient receptor potential cation channel, subfamily C, member 7
236904	mmu-miR-212-3p	Klhl15	kelch-like 15
20452	mmu-miR-335-3p	St8sia4	ST8 alpha-N-acetyl-neuraminide alpha-2,8-sialyltransferase 4
18491	mmu-miR-466i-3p	Pappa	pregnancy-associated plasma protein A
320840	mmu-miR-666-3p	Negr1	neuronal growth regulator 1
98682	mmu-miR-338-3p	Mfsd6	major facilitator superfamily domain containing 6
246086	mmu-miR-466h-5p	Onecut3	one cut domain, family member 3
70661	mmu-miR-484	Sik3	SIK family kinase 3
192285	mmu-miR-763	Phf21a	PHD finger protein 21A
19243	mmu-miR-362-3p	Ptp4a1	protein tyrosine phosphatase 4a1
211770	mmu-miR-760-3p	Trib1	tribbles pseudokinase 1
53892	mmu-miR-1187	Ppm1d	protein phosphatase 1D magnesium-dependent, delta isoform
237911	mmu-miR-1187	Brip1	BRCA1 interacting protein C-terminal helicase 1
18537	mmu-miR-1190	Pcmt1	protein-L-isoaspartate (D-aspartate) O-methyltransferase 1
12289	mmu-miR-666-3p	Cacna1d	calcium channel, voltage-dependent, L type, alpha 1D subunit
327900	mmu-miR-760-3p	Ubtd2	ubiquitin domain containing 2
320633	mmu-miR-207	Zbtb26	zinc finger and BTB domain containing 26
80890	mmu-miR-466a-5p	Trim2	tripartite motif-containing 2
69605	mmu-miR-362-3p	Lnp	limb and neural patterns
214162	mmu-miR-484	Kmt2a	lysine (K)-specific methyltransferase 2A
170826	mmu-miR-423-5p	Ppargc1b	peroxisome proliferative activated receptor, gamma, coactivator 1 beta
239405	mmu-miR-882	Rspo2	R-spondin 2
192161	mmu-miR-466j	Pcdha9	protocadherin alpha 9
15118	mmu-miR-883b-5p	Has3	hyaluronan synthase 3
22318	mmu-miR-362-3p	Vamp2	vesicle-associated membrane protein 2
67305	mmu-miR-770-5p	Gpx7	glutathione peroxidase 7
22390	mmu-miR-717	Wee1	WEE 1 homolog 1 (S. pombe)
18640	mmu-miR-466f-3p	Pfkfb2	6-phosphofructo-2-kinase/fructose-2,6-biphosphatase 2
68473	mmu-miR-338-3p	Mob1b	MOB kinase activator 1B
18019	mmu-miR-540-3p	Nfatc2	nuclear factor of activated T cells, cytoplasmic, calcineurin dependent 2
111173	mmu-miR-882	Erc1	ELKS/RAB6-interacting/CAST family member 1
103537	mmu-miR-291a-5p	Mbtd1	mbt domain containing 1
18843	mmu-miR-770-3p	Bpifa1	BPI fold containing family A, member 1
81000	mmu-miR-466i-3p	Rad54l2	RAD54 like 2 (S. cerevisiae)
11826	mmu-miR-423-5p	Aqp1	aquaporin 1
240396	mmu-miR-760-3p	Mex3c	mex3 RNA binding family member C
19201	mmu-miR-362-5p	Pstpip2	proline-serine-threonine phosphatase-interacting protein 2
24012	mmu-miR-466a-5p	Rgs7	regulator of G protein signaling 7
230824	mmu-miR-1190	Grhl3	grainyhead-like 3 (Drosophila)
19346	mmu-miR-296-3p	Rab6a	RAB6A, member RAS oncogene family
277250	mmu-miR-666-3p	Kdm3b	KDM3B lysine (K)-specific demethylase 3B
94253	mmu-miR-297b-5p	Hecw1	HECT, C2 and WW domain containing E3 ubiquitin protein ligase 1
54616	mmu-miR-466a-5p	Extl3	exostoses (multiple)-like 3
52665	mmu-miR-669h-5p	Echdc1	enoyl Coenzyme A hydratase domain containing 1
22608	mmu-miR-666-3p	Ybx1	Y box protein 1
77889	mmu-miR-466i-3p	Lbh	limb-bud and heart
11421	mmu-miR-409-3p	Ace	angiotensin I converting enzyme (peptidyl-dipeptidase A) 1
20750	mmu-miR-669h-5p	Spp1	secreted phosphoprotein 1
57780	mmu-miR-342-5p	Fxyd7	FXYD domain-containing ion transport regulator 7
320534	mmu-miR-763	Tmem104	transmembrane protein 104
17776	mmu-miR-125a-3p	Mast2	microtubule associated serine/threonine kinase 2
80892	mmu-miR-1190	Zfhx4	zinc finger homeodomain 4
16195	mmu-miR-34b-5p	Il6st	interleukin 6 signal transducer
21887	mmu-miR-125a-5p	Tle3	transducin-like enhancer of split 3
11488	mmu-miR-296-3p	Adam11	a disintegrin and metallopeptidase domain 11
16801	mmu-miR-342-5p	Arhgef1	Rho guanine nucleotide exchange factor (GEF) 1
72425	mmu-miR-466d-3p	Katnbl1	katanin p80 subunit B like 1
109676	mmu-miR-339-5p	Ank2	ankyrin 2, brain
16370	mmu-miR-466j	Irs4	insulin receptor substrate 4
22601	mmu-miR-188-3p	Yap1	yes-associated protein 1
75767	mmu-miR-142a-3p	Rab11fip1	RAB11 family interacting protein 1 (class I)
103266	mmu-miR-345-3p	Tmem263	transmembrane protein 263
15950	mmu-miR-467f	Ifi203	interferon activated gene 203
70575	mmu-miR-207	Gfod2	glucose-fructose oxidoreductase domain containing 2
101358	mmu-miR-467g	Fbxl14	F-box and leucine-rich repeat protein 14
12928	mmu-miR-151-3p	Crk	v-crk avian sarcoma virus CT10 oncogene homolog
14884	mmu-miR-666-3p	Gtf2h1	general transcription factor II H, polypeptide 1
21968	mmu-miR-34b-5p	Tom1	target of myb1 trafficking protein
12829	mmu-miR-296-5p	Col4a4	collagen, type IV, alpha 4
12577	mmu-miR-363-3p	Cdkn1c	cyclin-dependent kinase inhibitor 1C (P57)
14401	mmu-miR-126a-5p	Gabrb2	gamma-aminobutyric acid (GABA) A receptor, subunit beta 2
53414	mmu-miR-882	Bysl	bystin-like
76044	mmu-miR-199a-5p	Ncapg2	non-SMC condensin II complex, subunit G2
77889	mmu-miR-423-5p	Lbh	limb-bud and heart
56805	mmu-miR-871-5p	Zbtb33	zinc finger and BTB domain containing 33
234353	mmu-miR-669h-5p	Psd3	pleckstrin and Sec7 domain containing 3
66641	mmu-miR-292a-3p	Sike1	suppressor of IKBKE 1
225028	mmu-miR-338-3p	Map4k3	mitogen-activated protein kinase kinase kinase kinase 3
214230	mmu-miR-666-5p	Pak6	p21 protein (Cdc42/Rac)-activated kinase 6
269643	mmu-miR-207	Ppp2r2c	protein phosphatase 2, regulatory subunit B, gamma
24063	mmu-miR-296-3p	Spry1	sprouty homolog 1 (Drosophila)
19744	mmu-miR-686	Rheb	Ras homolog enriched in brain
66259	mmu-miR-363-3p	Camk2n1	calcium/calmodulin-dependent protein kinase II inhibitor 1
84652	mmu-miR-466c-5p	Fam126a	family with sequence similarity 126, member A
13131	mmu-miR-680	Dab1	disabled 1
66501	mmu-miR-423-5p	1700029H14Rik	RIKEN cDNA 1700029H14 gene
67956	mmu-miR-297b-5p	Setd8	SET domain containing (lysine methyltransferase) 8
66082	mmu-miR-125a-5p	Abhd6	abhydrolase domain containing 6
230796	mmu-miR-423-5p	Wdtc1	WD and tetratricopeptide repeats 1
75605	mmu-miR-760-3p	Kdm5b	lysine (K)-specific demethylase 5B
210029	mmu-miR-292a-3p	Metrnl	meteorin, glial cell differentiation regulator-like
170676	mmu-miR-207	Peg10	paternally expressed 10
18074	mmu-miR-713	Nid2	nidogen 2
216618	mmu-miR-770-5p	Cfap36	cilia and flagella associated protein 36
192198	mmu-miR-680	Lrrc4	leucine rich repeat containing 4
21429	mmu-miR-666-3p	Ubtf	upstream binding transcription factor, RNA polymerase I
67963	mmu-miR-760-3p	Npc2	Niemann-Pick type C2
208846	mmu-miR-466i-3p	Daam1	dishevelled associated activator of morphogenesis 1
20185	mmu-miR-466j	Ncor1	nuclear receptor co-repressor 1
72519	mmu-miR-34b-5p	Tmem55a	transmembrane protein 55A
55984	mmu-miR-466h-5p	Camkk1	calcium/calmodulin-dependent protein kinase kinase 1, alpha
56055	mmu-miR-770-3p	Gtpbp2	GTP binding protein 2
22433	mmu-miR-717	Xbp1	X-box binding protein 1
236920	mmu-miR-540-3p	Stard8	START domain containing 8
18491	mmu-miR-296-3p	Pappa	pregnancy-associated plasma protein A
66894	mmu-miR-680	Wwp2	WW domain containing E3 ubiquitin protein ligase 2
73469	mmu-miR-501-3p	Rnf38	ring finger protein 38
65973	mmu-miR-679-5p	Asph	aspartate-beta-hydroxylase
319832	mmu-miR-363-3p	Tmem229a	transmembrane protein 229A
71914	mmu-miR-1187	Antxr2	anthrax toxin receptor 2
29812	mmu-miR-540-3p	Ndrg3	N-myc downstream regulated gene 3
23796	mmu-miR-342-5p	Aplnr	apelin receptor
94229	mmu-miR-882	Slc4a10	solute carrier family 4, sodium bicarbonate cotransporter-like, member 10
226548	mmu-miR-532-3p	Aph1a	aph1 homolog A, gamma secretase subunit
210376	mmu-miR-770-5p	Mtmr9	myotubularin related protein 9
23881	mmu-miR-290a-5p	G3bp2	GTPase activating protein (SH3 domain) binding protein 2
239510	mmu-miR-763	Phf20l1	PHD finger protein 20-like 1
17931	mmu-miR-466h-5p	Ppp1r12a	protein phosphatase 1, regulatory (inhibitor) subunit 12A
332309	mmu-miR-339-5p	Grxcr2	glutaredoxin, cysteine rich 2
19663	mmu-miR-466c-5p	Rbpms	RNA binding protein gene with multiple splicing
28075	mmu-miR-679-5p	Desi1	desumoylating isopeptidase 1
80914	mmu-miR-297b-5p	Uck2	uridine-cytidine kinase 2
72080	mmu-miR-423-5p	Sapcd2	suppressor APC domain containing 2
13717	mmu-miR-125a-3p	Eln	elastin
170749	mmu-miR-34b-5p	Mtmr4	myotubularin related protein 4
11305	mmu-miR-466h-5p	Abca2	ATP-binding cassette, sub-family A (ABC1), member 2
81004	mmu-miR-34b-5p	Tbl1xr1	transducin (beta)-like 1X-linked receptor 1
20318	mmu-miR-34b-5p	Sdf4	stromal cell derived factor 4
218294	mmu-miR-338-5p	Cdc14b	CDC14 cell division cycle 14B
140806	mmu-miR-291a-3p	Il25	interleukin 25
226144	mmu-miR-540-3p	Erlin1	ER lipid raft associated 1
14391	mmu-miR-423-5p	Gabpb1	GA repeat binding protein, beta 1
228012	mmu-miR-324-5p	Tlk1	tousled-like kinase 1
20460	mmu-miR-484	Stil	Scl/Tal1 interrupting locus
11922	mmu-miR-324-5p	Neurod6	neurogenic differentiation 6
231470	mmu-miR-770-5p	Fras1	Fraser extracellular matrix complex subunit 1
20348	mmu-miR-669h-5p	Sema3c	sema domain, immunoglobulin domain (Ig), short basic domain, secreted, (semaphorin) 3C
66661	mmu-miR-292a-5p	Srp72	signal recognition particle 72
192196	mmu-miR-467f	Luc7l2	LUC7-like 2 (S. cerevisiae)
229675	mmu-miR-129-5p	Rsbn1	rosbin, round spermatid basic protein 1
68169	mmu-miR-1187	Ndnf	neuron-derived neurotrophic factor
232333	mmu-miR-760-3p	Slc6a1	solute carrier family 6 (neurotransmitter transporter, GABA), member 1
245671	mmu-miR-450b-3p	Klf8	Kruppel-like factor 8
26946	mmu-miR-671-3p	Trpc7	transient receptor potential cation channel, subfamily C, member 7
20516	mmu-miR-297b-5p	Slc20a2	solute carrier family 20, member 2
16443	mmu-miR-666-3p	Itsn1	intersectin 1 (SH3 domain protein 1A)
22003	mmu-miR-290a-3p	Tpm1	tropomyosin 1, alpha
54396	mmu-miR-1190	Irgm2	immunity-related GTPase family M member 2
18115	mmu-miR-345-3p	Nnt	nicotinamide nucleotide transhydrogenase
77739	mmu-miR-423-5p	Adamtsl1	ADAMTS-like 1
22415	mmu-miR-763	Wnt3	wingless-type MMTV integration site family, member 3
57261	mmu-miR-760-3p	Brd4	bromodomain containing 4
20866	mmu-miR-713	Stim1	stromal interaction molecule 1
18530	mmu-miR-542-3p	Pcdh8	protocadherin 8
67040	mmu-miR-380-5p	Ddx17	DEAD (Asp-Glu-Ala-Asp) box polypeptide 17
56772	mmu-miR-882	Mllt11	myeloid/lymphoid or mixed-lineage leukemia; translocated to, 11
73178	mmu-miR-770-5p	Wasl	Wiskott-Aldrich syndrome-like (human)
58245	mmu-miR-363-3p	Gpr180	G protein-coupled receptor 180
15568	mmu-miR-690	Elavl1	ELAV (embryonic lethal, abnormal vision)-like 1 (Hu antigen R)
231470	mmu-miR-713	Fras1	Fraser extracellular matrix complex subunit 1
76792	mmu-miR-680	2410131K14Rik	RIKEN cDNA 2410131K14 gene
15166	mmu-miR-363-3p	Hcn2	hyperpolarization-activated, cyclic nucleotide-gated K+ 2
108030	mmu-miR-466c-5p	Lin7a	lin-7 homolog A (C. elegans)
234362	mmu-miR-690	Zfp868	zinc finger protein 868
17169	mmu-miR-883b-5p	Mark3	MAP/microtubule affinity regulating kinase 3
71145	mmu-miR-760-3p	Scara5	scavenger receptor class A, member 5
668212	mmu-miR-466i-3p	Efr3b	EFR3 homolog B
13799	mmu-miR-212-3p	En2	engrailed 2
67035	mmu-miR-466i-3p	Dnajb4	DnaJ heat shock protein family (Hsp40) member B4
11637	mmu-miR-342-5p	Ak2	adenylate kinase 2
18935	mmu-miR-362-3p	Phox2b	paired-like homeobox 2b
16450	mmu-miR-129-5p	Jag2	jagged 2
108116	mmu-miR-188-5p	Slco3a1	solute carrier organic anion transporter family, member 3a1
14605	mmu-miR-188-3p	Tsc22d3	TSC22 domain family, member 3
78246	mmu-miR-882	Phf23	PHD finger protein 23
14255	mmu-miR-760-3p	Flt3	FMS-like tyrosine kinase 3
53310	mmu-miR-199a-3p	Dlg3	discs, large homolog 3 (Drosophila)
22418	mmu-miR-669f-3p	Wnt5a	wingless-type MMTV integration site family, member 5A
214944	mmu-miR-882	Mob3b	MOB kinase activator 3B
319670	mmu-miR-1187	Eml5	echinoderm microtubule associated protein like 5
140491	mmu-miR-335-3p	Ppp1r3a	protein phosphatase 1, regulatory (inhibitor) subunit 3A
12387	mmu-miR-702-3p	Ctnnb1	catenin (cadherin associated protein), beta 1
19317	mmu-miR-466j	Qk	quaking
272031	mmu-miR-682	Plppr1	phospholipid phosphatase related 1
66270	mmu-miR-466j	Fam134b	family with sequence similarity 134, member B
15208	mmu-miR-501-3p	Hes5	hairy and enhancer of split 5 (Drosophila)
319197	mmu-miR-466i-3p	Gpr4	G protein-coupled receptor 4
13548	mmu-miR-1190	Dyrk1a	dual-specificity tyrosine-(Y)-phosphorylation regulated kinase 1a
66775	mmu-miR-151-3p	Hacd4	3-hydroxyacyl-CoA dehydratase 4
17295	mmu-miR-199a-3p	Met	met proto-oncogene
56403	mmu-miR-540-3p	Syncrip	synaptotagmin binding, cytoplasmic RNA interacting protein
237213	mmu-miR-291a-5p	Glra2	glycine receptor, alpha 2 subunit
12298	mmu-miR-690	Cacnb4	calcium channel, voltage-dependent, beta 4 subunit
12812	mmu-miR-484	Coil	coilin
319939	mmu-miR-466i-3p	Tns3	tensin 3
27366	mmu-miR-760-3p	Txnl4a	thioredoxin-like 4A
320150	mmu-miR-882	Zdhhc17	zinc finger, DHHC domain containing 17
114874	mmu-miR-679-5p	Ddhd1	DDHD domain containing 1
11891	mmu-miR-666-3p	Rab27a	RAB27A, member RAS oncogene family
81896	mmu-miR-466j	Ift122	intraflagellar transport 122
77673	mmu-miR-292a-5p	Defb41	defensin beta 41
54635	mmu-miR-34b-5p	Pdgfc	platelet-derived growth factor, C polypeptide
20482	mmu-miR-466h-5p	Skil	SKI-like
98496	mmu-miR-466f-3p	Pid1	phosphotyrosine interaction domain containing 1
101148	mmu-miR-125a-3p	B630005N14Rik	RIKEN cDNA B630005N14 gene
208846	mmu-miR-467g	Daam1	dishevelled associated activator of morphogenesis 1
232430	mmu-miR-1187	Crebl2	cAMP responsive element binding protein-like 2
17865	mmu-miR-883b-5p	Mybl2	myeloblastosis oncogene-like 2
269397	mmu-miR-466f-3p	Ss18l1	synovial sarcoma translocation gene on chromosome 18-like 1
63985	mmu-miR-490-3p	Gmfb	glia maturation factor, beta
192663	mmu-miR-490-3p	Abcg4	ATP-binding cassette, sub-family G (WHITE), member 4
18933	mmu-miR-686	Prrx1	paired related homeobox 1
94246	mmu-miR-292a-3p	Arid4b	AT rich interactive domain 4B (RBP1-like)
117150	mmu-miR-760-3p	Pip4k2c	phosphatidylinositol-5-phosphate 4-kinase, type II, gamma
70122	mmu-miR-669a-5p	Mllt3	myeloid/lymphoid or mixed-lineage leukemia; translocated to, 3
66715	mmu-miR-679-5p	Henmt1	HEN1 methyltransferase homolog 1 (Arabidopsis)
68292	mmu-miR-882	Stt3b	STT3, subunit of the oligosaccharyltransferase complex, homolog B (S. cerevisiae)
15258	mmu-miR-207	Hipk2	homeodomain interacting protein kinase 2
20370	mmu-miR-423-5p	Sez6	seizure related gene 6
215693	mmu-miR-466d-3p	Zmat1	zinc finger, matrin type 1
13197	mmu-miR-484	Gadd45a	growth arrest and DNA-damage-inducible 45 alpha
22781	mmu-miR-882	Ikzf4	IKAROS family zinc finger 4
20371	mmu-miR-770-3p	Foxp3	forkhead box P3
14269	mmu-miR-882	Fnbp1	formin binding protein 1
13728	mmu-miR-292a-3p	Mark2	MAP/microtubule affinity regulating kinase 2
214791	mmu-miR-207	Sertad4	SERTA domain containing 4
93686	mmu-miR-760-3p	Rbfox2	RNA binding protein, fox-1 homolog (C. elegans) 2
329065	mmu-miR-339-5p	Scd4	stearoyl-coenzyme A desaturase 4
66310	mmu-miR-717	Dpy30	dpy-30, histone methyltransferase complex regulatory subunit
18129	mmu-miR-883b-5p	Notch2	notch 2
67469	mmu-miR-770-5p	Abhd5	abhydrolase domain containing 5
69934	mmu-miR-465a-3p	Trmt10b	tRNA methyltransferase 10B
213121	mmu-miR-702-3p	Ankrd35	ankyrin repeat domain 35
11922	mmu-miR-466h-5p	Neurod6	neurogenic differentiation 6
67821	mmu-miR-363-3p	Atp1b4	ATPase, (Na+)/K+ transporting, beta 4 polypeptide
56055	mmu-miR-207	Gtpbp2	GTP binding protein 2
238988	mmu-miR-484	Erc2	ELKS/RAB6-interacting/CAST family member 2
12928	mmu-miR-760-3p	Crk	v-crk avian sarcoma virus CT10 oncogene homolog
20609	mmu-miR-871-5p	Sstr5	somatostatin receptor 5
17357	mmu-miR-450b-3p	Marcksl1	MARCKS-like 1
16599	mmu-miR-324-5p	Klf3	Kruppel-like factor 3 (basic)
64009	mmu-miR-125a-3p	Syne1	spectrin repeat containing, nuclear envelope 1
103136	mmu-miR-540-3p	Pwp1	PWP1 homolog, endonuclein
67703	mmu-miR-760-3p	Kirrel3	kin of IRRE like 3 (Drosophila)
72993	mmu-miR-1191a	Appl1	adaptor protein, phosphotyrosine interaction, PH domain and leucine zipper containing 1
234577	mmu-miR-763	Cpne2	copine II
212276	mmu-miR-142a-3p	Zfp748	zinc finger protein 748
77053	mmu-miR-324-5p	Sun1	Sad1 and UNC84 domain containing 1
75029	mmu-miR-770-5p	Purg	purine-rich element binding protein G
226517	mmu-miR-713	Smg7	Smg-7 homolog, nonsense mediated mRNA decay factor (C. elegans)
11906	mmu-miR-290a-5p	Zfhx3	zinc finger homeobox 3
231991	mmu-miR-1190	Creb5	cAMP responsive element binding protein 5
76787	mmu-miR-296-5p	Ppfia3	protein tyrosine phosphatase, receptor type, f polypeptide (PTPRF), interacting protein (liprin), alpha 3
54371	mmu-miR-188-3p	Chst2	carbohydrate sulfotransferase 2
11798	mmu-miR-296-3p	Xiap	X-linked inhibitor of apoptosis
58200	mmu-miR-199a-5p	Ppp1r1a	protein phosphatase 1, regulatory (inhibitor) subunit 1A
235281	mmu-miR-882	Scn3b	sodium channel, voltage-gated, type III, beta
50791	mmu-miR-882	Magi2	membrane associated guanylate kinase, WW and PDZ domain containing 2
234678	mmu-miR-770-3p	D230025D16Rik	RIKEN cDNA D230025D16 gene
240665	mmu-miR-713	Ccnj	cyclin J
329554	mmu-miR-770-5p	Gm826	predicted gene 826
83671	mmu-miR-1191a	Sytl2	synaptotagmin-like 2
268970	mmu-miR-34b-5p	Arhgap28	Rho GTPase activating protein 28
24131	mmu-miR-466i-3p	Ldb3	LIM domain binding 3
66913	mmu-miR-615-3p	Kdelr2	KDEL (Lys-Asp-Glu-Leu) endoplasmic reticulum protein retention receptor 2
94093	mmu-miR-804	Trim33	tripartite motif-containing 33
83921	mmu-miR-666-3p	Tmem2	transmembrane protein 2
209446	mmu-miR-690	Tfe3	transcription factor E3
110796	mmu-miR-540-3p	Tshz1	teashirt zinc finger family member 1
66923	mmu-miR-129-5p	Pbrm1	polybromo 1
246787	mmu-miR-671-3p	Slc5a2	solute carrier family 5 (sodium/glucose cotransporter), member 2
16599	mmu-miR-882	Klf3	Kruppel-like factor 3 (basic)
66105	mmu-miR-542-3p	Ube2d3	ubiquitin-conjugating enzyme E2D 3
67433	mmu-miR-292a-5p	Ccdc127	coiled-coil domain containing 127
23871	mmu-miR-199a-5p	Ets1	E26 avian leukemia oncogene 1, 5' domain
195733	mmu-miR-129-5p	Grhl1	grainyhead-like 1 (Drosophila)
15374	mmu-miR-212-3p	Hn1	hematological and neurological expressed sequence 1
246154	mmu-miR-883b-5p	Vasn	vasorin
228005	mmu-miR-290a-5p	Ppig	peptidyl-prolyl isomerase G (cyclophilin G)
11777	mmu-miR-666-3p	Ap3s1	adaptor-related protein complex 3, sigma 1 subunit
22145	mmu-miR-296-5p	Tuba4a	tubulin, alpha 4A
12937	mmu-miR-466j	Pcdha6	protocadherin alpha 6
56771	mmu-miR-763	Med20	mediator complex subunit 20
20231	mmu-miR-466i-3p	Nkx1-2	NK1 transcription factor related, locus 2 (Drosophila)
14950	mmu-miR-423-5p	H13	histocompatibility 13
20479	mmu-miR-125a-5p	Vps4b	vacuolar protein sorting 4B
19889	mmu-miR-669f-3p	Rp2	retinitis pigmentosa 2 homolog
76594	mmu-miR-129-5p	Dnajc18	DnaJ heat shock protein family (Hsp40) member C18
327814	mmu-miR-466g	Ppfia2	protein tyrosine phosphatase, receptor type, f polypeptide (PTPRF), interacting protein (liprin), alpha 2
103583	mmu-miR-763	Fbxw11	F-box and WD-40 domain protein 11
71393	mmu-miR-669h-3p	Kctd6	potassium channel tetramerisation domain containing 6
20974	mmu-miR-883b-5p	Syngr3	synaptogyrin 3
18027	mmu-miR-342-5p	Nfia	nuclear factor I/A
74334	mmu-miR-342-5p	Ranbp10	RAN binding protein 10
101358	mmu-miR-466d-3p	Fbxl14	F-box and leucine-rich repeat protein 14
231003	mmu-miR-669a-5p	Klhl17	kelch-like 17
80752	mmu-miR-363-3p	Fam20c	family with sequence similarity 20, member C
108089	mmu-miR-466f-5p	Rnf144a	ring finger protein 144A
217666	mmu-miR-687	L2hgdh	L-2-hydroxyglutarate dehydrogenase
77629	mmu-miR-342-5p	Sphkap	SPHK1 interactor, AKAP domain containing
14009	mmu-miR-129-5p	Etv1	ets variant 1
80748	mmu-miR-760-3p	BC004004	cDNA sequence BC004004
69260	mmu-miR-291a-5p	Ing2	inhibitor of growth family, member 2
209497	mmu-miR-666-3p	Tmem164	transmembrane protein 164
22330	mmu-miR-882	Vcl	vinculin
105559	mmu-miR-466a-5p	Mbnl2	muscleblind-like 2
67553	mmu-miR-324-5p	Gstcd	glutathione S-transferase, C-terminal domain containing
18088	mmu-miR-423-5p	Nkx2-2	NK2 homeobox 2
15939	mmu-miR-466i-3p	Ier5	immediate early response 5
17210	mmu-miR-125b-5p	Mcl1	myeloid cell leukemia sequence 1
18028	mmu-miR-339-5p	Nfib	nuclear factor I/B
268567	mmu-miR-423-5p	Tmem229b	transmembrane protein 229B
19878	mmu-miR-882	Rock2	Rho-associated coiled-coil containing protein kinase 2
20689	mmu-miR-362-3p	Sall3	sal-like 3 (Drosophila)
13176	mmu-miR-291a-5p	Dcc	deleted in colorectal carcinoma
17357	mmu-miR-680	Marcksl1	MARCKS-like 1
107831	mmu-miR-770-3p	Adgrb1	adhesion G protein-coupled receptor B1
211556	mmu-miR-883a-5p	Ap1ar	adaptor-related protein complex 1 associated regulatory protein
225600	mmu-miR-679-5p	Pde6a	phosphodiesterase 6A, cGMP-specific, rod, alpha
56309	mmu-miR-760-3p	Mycbp	MYC binding protein
270192	mmu-miR-582-5p	Rab6b	RAB6B, member RAS oncogene family
56526	mmu-miR-34b-5p	2016-09-06	septin 6
74479	mmu-miR-702-3p	Snx11	sorting nexin 11
18530	mmu-miR-34b-5p	Pcdh8	protocadherin 8
53860	mmu-miR-770-3p	2016-09-09	septin 9
19744	mmu-miR-125a-3p	Rheb	Ras homolog enriched in brain
12778	mmu-miR-532-3p	Ackr3	atypical chemokine receptor 3
80883	mmu-miR-770-5p	Ntng1	netrin G1
269400	mmu-miR-423-5p	Rtel1	regulator of telomere elongation helicase 1
72168	mmu-miR-883a-5p	Aifm3	apoptosis-inducing factor, mitochondrion-associated 3
13642	mmu-miR-467f	Efnb2	ephrin B2
28109	mmu-miR-345-3p	D10Wsu102e	DNA segment, Chr 10, Wayne State University 102, expressed
14586	mmu-miR-207	Gfra2	glial cell line derived neurotrophic factor family receptor alpha 2
18641	mmu-miR-125a-3p	Pfkl	phosphofructokinase, liver, B-type
20269	mmu-miR-763	Scn3a	sodium channel, voltage-gated, type III, alpha
226519	mmu-miR-883b-5p	Lamc1	laminin, gamma 1
30955	mmu-miR-763	Pik3cg	phosphoinositide-3-kinase, catalytic, gamma polypeptide
17967	mmu-miR-345-3p	Ncam1	neural cell adhesion molecule 1
320202	mmu-miR-291a-3p	Lefty2	left-right determination factor 2
18013	mmu-miR-129-5p	Neurod2	neurogenic differentiation 2
20355	mmu-miR-467f	Sema4f	sema domain, immunoglobulin domain (Ig), TM domain, and short cytoplasmic domain
14593	mmu-miR-466a-5p	Ggps1	geranylgeranyl diphosphate synthase 1
56392	mmu-miR-532-3p	Shoc2	soc-2 (suppressor of clear) homolog (C. elegans)
14119	mmu-miR-770-5p	Fbn2	fibrillin 2
11488	mmu-miR-296-5p	Adam11	a disintegrin and metallopeptidase domain 11
75734	mmu-miR-125a-3p	Mff	mitochondrial fission factor
20529	mmu-miR-882	Slc31a1	solute carrier family 31, member 1
21646	mmu-miR-540-3p	Tcte2	t-complex-associated testis expressed 2
13990	mmu-miR-871-5p	Smarcad1	SWI/SNF-related, matrix-associated actin-dependent regulator of chromatin, subfamily a, containing DEAD/H box 1
11909	mmu-miR-467f	Atf2	activating transcription factor 2
268470	mmu-miR-292a-3p	Ube2z	ubiquitin-conjugating enzyme E2Z
73284	mmu-miR-466f-3p	Ddit4l	DNA-damage-inducible transcript 4-like
56294	mmu-miR-466f-3p	Ptpn9	protein tyrosine phosphatase, non-receptor type 9
208154	mmu-miR-466i-3p	Btla	B and T lymphocyte associated
192119	mmu-miR-291a-5p	Dicer1	dicer 1, ribonuclease type III
70591	mmu-miR-466j	5730455P16Rik	RIKEN cDNA 5730455P16 gene
494448	mmu-miR-129-5p	Cbx6	chromobox 6
229776	mmu-miR-199a-3p	Cdc14a	CDC14 cell division cycle 14A
66105	mmu-miR-188-3p	Ube2d3	ubiquitin-conjugating enzyme E2D 3
235604	mmu-miR-532-3p	Camkv	CaM kinase-like vesicle-associated
67480	mmu-miR-466f-3p	Cwc25	CWC25 spliceosome-associated protein
67996	mmu-miR-292a-5p	Srsf6	serine/arginine-rich splicing factor 6
233805	mmu-miR-290a-3p	Dcun1d3	DCN1, defective in cullin neddylation 1, domain containing 3 (S. cerevisiae)
108062	mmu-miR-760-3p	Cstf2	cleavage stimulation factor, 3' pre-RNA subunit 2
13078	mmu-miR-690	Cyp1b1	cytochrome P450, family 1, subfamily b, polypeptide 1
54383	mmu-miR-760-3p	Phc2	polyhomeotic-like 2 (Drosophila)
58212	mmu-miR-296-5p	Srrm3	serine/arginine repetitive matrix 3
107589	mmu-miR-466i-3p	Mylk	myosin, light polypeptide kinase
16561	mmu-miR-770-3p	Kif1b	kinesin family member 1B
68420	mmu-miR-690	Ankrd13a	ankyrin repeat domain 13a
77733	mmu-miR-713	Rnf170	ring finger protein 170
16194	mmu-miR-760-3p	Il6ra	interleukin 6 receptor, alpha
268420	mmu-miR-290a-5p	Alkbh5	alkB homolog 5, RNA demethylase
17540	mmu-miR-466j	Mrvi1	MRV integration site 1
19270	mmu-miR-465a-3p	Ptprg	protein tyrosine phosphatase, receptor type, G
22044	mmu-miR-296-5p	Trh	thyrotropin releasing hormone
233789	mmu-miR-679-5p	Smg1	SMG1 homolog, phosphatidylinositol 3-kinase-related kinase (C. elegans)
72179	mmu-miR-770-5p	Fbxl2	F-box and leucine-rich repeat protein 2
56758	mmu-miR-188-5p	Mbnl1	muscleblind-like 1 (Drosophila)
27397	mmu-miR-804	Mrpl17	mitochondrial ribosomal protein L17
16010	mmu-miR-702-3p	Igfbp4	insulin-like growth factor binding protein 4
99296	mmu-miR-466h-5p	Hrh3	histamine receptor H3
65020	mmu-miR-125a-3p	Zfp110	zinc finger protein 110
22003	mmu-miR-142a-3p	Tpm1	tropomyosin 1, alpha
170762	mmu-miR-466b-3p	Nup155	nucleoporin 155
27280	mmu-miR-466h-5p	Phlda3	pleckstrin homology like domain, family A, member 3
103406	mmu-miR-296-3p	Zfr2	zinc finger RNA binding protein 2
19713	mmu-miR-669i	Ret	ret proto-oncogene
14028	mmu-miR-466d-3p	Evx1	even-skipped homeobox 1
12322	mmu-miR-760-3p	Camk2a	calcium/calmodulin-dependent protein kinase II alpha
18573	mmu-miR-151-3p	Pde1a	phosphodiesterase 1A, calmodulin-dependent
213499	mmu-miR-188-3p	Fbxo42	F-box protein 42
338523	mmu-miR-466j	Kdm7a	lysine (K)-specific demethylase 7A
212986	mmu-miR-669h-3p	Scfd2	Sec1 family domain containing 2
212442	mmu-miR-466h-5p	Lactb2	lactamase, beta 2
19092	mmu-miR-882	Prkg2	protein kinase, cGMP-dependent, type II
75590	mmu-miR-212-3p	Dusp9	dual specificity phosphatase 9
14137	mmu-miR-690	Fdft1	farnesyl diphosphate farnesyl transferase 1
216505	mmu-miR-770-5p	Pik3ip1	phosphoinositide-3-kinase interacting protein 1
244141	mmu-miR-345-3p	Nars2	asparaginyl-tRNA synthetase 2 (mitochondrial)(putative)
217364	mmu-miR-125a-3p	Engase	endo-beta-N-acetylglucosaminidase
94253	mmu-miR-770-5p	Hecw1	HECT, C2 and WW domain containing E3 ubiquitin protein ligase 1
72238	mmu-miR-199a-3p	Tbc1d5	TBC1 domain family, member 5
72180	mmu-miR-291a-3p	Zfp661	zinc finger protein 661
67487	mmu-miR-466f-3p	Dhx40	DEAH (Asp-Glu-Ala-His) box polypeptide 40
20845	mmu-miR-770-3p	Star	steroidogenic acute regulatory protein
19428	mmu-miR-324-5p	Rasl2-9	RAS-like, family 2, locus 9
239099	mmu-miR-125a-5p	Homez	homeodomain leucine zipper-encoding gene
19246	mmu-miR-484	Ptpn1	protein tyrosine phosphatase, non-receptor type 1
243312	mmu-miR-466h-5p	Elfn1	leucine rich repeat and fibronectin type III, extracellular 1
60533	mmu-miR-290a-3p	Cd274	CD274 antigen
50721	mmu-miR-760-3p	Sirt6	sirtuin 6
192663	mmu-miR-423-5p	Abcg4	ATP-binding cassette, sub-family G (WHITE), member 4
73469	mmu-miR-199a-5p	Rnf38	ring finger protein 38
15185	mmu-miR-34b-5p	Hdac6	histone deacetylase 6
332578	mmu-miR-466a-5p	Lcn10	lipocalin 10
67300	mmu-miR-188-3p	Cltc	clathrin, heavy polypeptide (Hc)
67486	mmu-miR-290a-3p	Polr3g	polymerase (RNA) III (DNA directed) polypeptide G
17118	mmu-miR-770-5p	Marcks	myristoylated alanine rich protein kinase C substrate
27224	mmu-miR-1187	Tceb3	transcription elongation factor B (SIII), polypeptide 3
99586	mmu-miR-291a-5p	Dpyd	dihydropyrimidine dehydrogenase
12217	mmu-miR-466i-3p	Bsn	bassoon
104416	mmu-miR-339-5p	Bap1	Brca1 associated protein 1
329540	mmu-miR-292a-3p	Nol4l	nucleolar protein 4-like
22404	mmu-miR-1187	Wiz	widely-interspaced zinc finger motifs
209225	mmu-miR-760-3p	Zfp710	zinc finger protein 710
19347	mmu-miR-484	Dennd5a	DENN/MADD domain containing 5A
320538	mmu-miR-669f-3p	Ubn2	ubinuclein 2
20496	mmu-miR-466f-3p	Slc12a2	solute carrier family 12, member 2
19192	mmu-miR-423-5p	Psme3	proteaseome (prosome, macropain) activator subunit 3 (PA28 gamma, Ki)
50523	mmu-miR-188-5p	Lats2	large tumor suppressor 2
20535	mmu-miR-296-5p	Slc4a2	solute carrier family 4 (anion exchanger), member 2
14183	mmu-miR-423-3p	Fgfr2	fibroblast growth factor receptor 2
97884	mmu-miR-199a-3p	B3galnt2	UDP-GalNAc:betaGlcNAc beta 1,3-galactosaminyltransferase, polypeptide 2
17294	mmu-miR-540-3p	Mest	mesoderm specific transcript
245555	mmu-miR-188-3p	C77370	expressed sequence C77370
13193	mmu-miR-297b-5p	Dcx	doublecortin
228410	mmu-miR-466d-3p	Cstf3	cleavage stimulation factor, 3' pre-RNA, subunit 3
14007	mmu-miR-291a-5p	Celf2	CUGBP, Elav-like family member 2
13639	mmu-miR-466h-5p	Efna4	ephrin A4
13813	mmu-miR-484	Eomes	eomesodermin
66369	mmu-miR-363-3p	Dus2	dihydrouridine synthase 2
215951	mmu-miR-490-3p	Lace1	lactation elevated 1
77673	mmu-miR-290a-5p	Defb41	defensin beta 41
19353	mmu-miR-142a-3p	Rac1	RAS-related C3 botulinum substrate 1
245128	mmu-miR-466f-3p	AU018091	expressed sequence AU018091
107358	mmu-miR-883b-5p	Tm9sf3	transmembrane 9 superfamily member 3
217198	mmu-miR-339-5p	Plekhh3	pleckstrin homology domain containing, family H (with MyTH4 domain) member 3
19155	mmu-miR-666-3p	Npepps	aminopeptidase puromycin sensitive
219150	mmu-miR-760-3p	Hmbox1	homeobox containing 1
14586	mmu-miR-882	Gfra2	glial cell line derived neurotrophic factor family receptor alpha 2
67991	mmu-miR-212-3p	Nacc2	nucleus accumbens associated 2, BEN and BTB (POZ) domain containing
320685	mmu-miR-466h-5p	Dctd	dCMP deaminase
210172	mmu-miR-666-3p	Zfp526	zinc finger protein 526
21349	mmu-miR-466f-3p	Tal1	T cell acute lymphocytic leukemia 1
229900	mmu-miR-129-5p	Gbp7	guanylate binding protein 7
24059	mmu-miR-882	Slco2a1	solute carrier organic anion transporter family, member 2a1
230903	mmu-miR-423-5p	Fbxo44	F-box protein 44
75553	mmu-miR-466g	Zc3h14	zinc finger CCCH type containing 14
18109	mmu-miR-501-3p	Mycn	v-myc avian myelocytomatosis viral related oncogene, neuroblastoma derived
12345	mmu-miR-532-3p	Capzb	capping protein (actin filament) muscle Z-line, beta
12406	mmu-miR-679-5p	Serpinh1	serine (or cysteine) peptidase inhibitor, clade H, member 1
18607	mmu-miR-345-3p	Pdpk1	3-phosphoinositide dependent protein kinase 1
74769	mmu-miR-1190	Pik3cb	phosphatidylinositol 3-kinase, catalytic, beta polypeptide
246179	mmu-miR-760-3p	Fktn	fukutin
319740	mmu-miR-423-3p	Zfyve27	zinc finger, FYVE domain containing 27
239985	mmu-miR-466i-3p	Arid1b	AT rich interactive domain 1B (SWI-like)
74996	mmu-miR-290a-5p	Usp47	ubiquitin specific peptidase 47
71704	mmu-miR-380-5p	Arhgef3	Rho guanine nucleotide exchange factor (GEF) 3
68205	mmu-miR-763	Urm1	ubiquitin related modifier 1
192161	mmu-miR-882	Pcdha9	protocadherin alpha 9
76890	mmu-miR-466h-5p	Memo1	mediator of cell motility 1
207212	mmu-miR-484	Arhgef17	Rho guanine nucleotide exchange factor (GEF) 17
52009	mmu-miR-532-3p	Hn1l	hematological and neurological expressed 1-like
16650	mmu-miR-540-3p	Kpna6	karyopherin (importin) alpha 6
16403	mmu-miR-542-5p	Itga6	integrin alpha 6
11938	mmu-miR-466f-3p	Atp2a2	ATPase, Ca++ transporting, cardiac muscle, slow twitch 2
230753	mmu-miR-540-3p	Thrap3	thyroid hormone receptor associated protein 3
53416	mmu-miR-363-3p	Stk39	serine/threonine kinase 39
29877	mmu-miR-338-5p	Hdgfrp3	hepatoma-derived growth factor, related protein 3
100072	mmu-miR-296-3p	Camta1	calmodulin binding transcription activator 1
16950	mmu-miR-362-5p	Loxl3	lysyl oxidase-like 3
17318	mmu-miR-804	Mid1	midline 1
20674	mmu-miR-290a-5p	Sox2	SRY (sex determining region Y)-box 2
232023	mmu-miR-680	Vopp1	vesicular, overexpressed in cancer, prosurvival protein 1
244879	mmu-miR-466j	Npat	nuclear protein in the AT region
56305	mmu-miR-717	Pitpnb	phosphatidylinositol transfer protein, beta
14180	mmu-miR-669h-5p	Fgf9	fibroblast growth factor 9
22130	mmu-miR-423-5p	Ttf1	transcription termination factor, RNA polymerase I
170770	mmu-miR-532-3p	Bbc3	BCL2 binding component 3
216760	mmu-miR-882	Mfap3	microfibrillar-associated protein 3
194237	mmu-miR-339-5p	Rimkla	ribosomal modification protein rimK-like family member A
28193	mmu-miR-466h-5p	Reep3	receptor accessory protein 3
29819	mmu-miR-380-5p	Stau2	staufen (RNA binding protein) homolog 2 (Drosophila)
16882	mmu-miR-362-5p	Lig3	ligase III, DNA, ATP-dependent
56494	mmu-miR-1190	Gosr2	golgi SNAP receptor complex member 2
235050	mmu-miR-125a-3p	Zfp810	zinc finger protein 810
72821	mmu-miR-532-3p	Scn2b	sodium channel, voltage-gated, type II, beta
26406	mmu-miR-763	Map3k3	mitogen-activated protein kinase kinase kinase 3
21916	mmu-miR-666-3p	Tmod1	tropomodulin 1
217082	mmu-miR-467g	Hlf	hepatic leukemia factor
67384	mmu-miR-409-3p	Bag4	BCL2-associated athanogene 4
60525	mmu-miR-882	Acss2	acyl-CoA synthetase short-chain family member 2
79201	mmu-miR-883b-5p	Tnfrsf23	tumor necrosis factor receptor superfamily, member 23
14464	mmu-miR-339-5p	Gata5	GATA binding protein 5
217410	mmu-miR-345-3p	Trib2	tribbles pseudokinase 2
12297	mmu-miR-296-5p	Cacnb3	calcium channel, voltage-dependent, beta 3 subunit
13394	mmu-miR-125a-3p	Dlx4	distal-less homeobox 4
71148	mmu-miR-669h-3p	Mier1	MEIR1 treanscription regulator
16549	mmu-miR-296-5p	Khsrp	KH-type splicing regulatory protein
71508	mmu-miR-1187	Zfp935	zinc finger protein 935
68693	mmu-miR-125a-5p	Hnrnpul2	heterogeneous nuclear ribonucleoprotein U-like 2
239250	mmu-miR-466h-5p	Slitrk6	SLIT and NTRK-like family, member 6
226182	mmu-miR-669h-3p	Taf5	TATA-box binding protein associated factor 5
241919	mmu-miR-450b-3p	Slc7a14	solute carrier family 7 (cationic amino acid transporter, y+ system), member 14
56458	mmu-miR-362-3p	Foxo1	forkhead box O1
19299	mmu-miR-540-3p	Abcd3	ATP-binding cassette, sub-family D (ALD), member 3
29812	mmu-miR-450b-3p	Ndrg3	N-myc downstream regulated gene 3
80913	mmu-miR-296-3p	Pum2	pumilio RNA-binding family member 2
67181	mmu-miR-669h-5p	Ctdnep1	CTD nuclear envelope phosphatase 1
66673	mmu-miR-324-5p	Sorcs3	sortilin-related VPS10 domain containing receptor 3
56426	mmu-miR-467f	Pdcd10	programmed cell death 10
14042	mmu-miR-129-5p	Ext1	exostoses (multiple) 1
12227	mmu-miR-582-5p	Btg2	B cell translocation gene 2, anti-proliferative
50907	mmu-miR-680	Preb	prolactin regulatory element binding
380694	mmu-miR-882	Ccnjl	cyclin J-like
67956	mmu-miR-680	Setd8	SET domain containing (lysine methyltransferase) 8
20918	mmu-miR-760-3p	Eif1	eukaryotic translation initiation factor 1
214952	mmu-miR-125a-5p	Rhot2	ras homolog family member T2
93679	mmu-miR-882	Trim8	tripartite motif-containing 8
194237	mmu-miR-669a-5p	Rimkla	ribosomal modification protein rimK-like family member A
228785	mmu-miR-466h-5p	Mylk2	myosin, light polypeptide kinase 2, skeletal muscle
329777	mmu-miR-324-5p	Pigk	phosphatidylinositol glycan anchor biosynthesis, class K
27219	mmu-miR-423-5p	Sgk2	serum/glucocorticoid regulated kinase 2
22680	mmu-miR-466g	Zfp207	zinc finger protein 207
27205	mmu-miR-199a-5p	Podxl	podocalyxin-like
238386	mmu-miR-466j	Btbd7	BTB (POZ) domain containing 7
18451	mmu-miR-666-3p	P4ha1	procollagen-proline, 2-oxoglutarate 4-dioxygenase (proline 4-hydroxylase), alpha 1 polypeptide
103841	mmu-miR-34b-5p	Cuedc1	CUE domain containing 1
208968	mmu-miR-450b-3p	Zfp280c	zinc finger protein 280C
235323	mmu-miR-188-5p	Usp28	ubiquitin specific peptidase 28
12305	mmu-miR-763	Ddr1	discoidin domain receptor family, member 1
75580	mmu-miR-207	Zbtb4	zinc finger and BTB domain containing 4
27401	mmu-miR-763	Skp2	S-phase kinase-associated protein 2 (p45)
75453	mmu-miR-423-5p	Ccdc7b	coiled-coil domain containing 7B
209027	mmu-miR-339-5p	Pycr1	pyrroline-5-carboxylate reductase 1
18749	mmu-miR-882	Prkacb	protein kinase, cAMP dependent, catalytic, beta
15410	mmu-miR-296-3p	Hoxb3	homeobox B3
319880	mmu-miR-760-3p	Tmcc3	transmembrane and coiled coil domains 3
71770	mmu-miR-296-3p	Ap2b1	adaptor-related protein complex 2, beta 1 subunit
11909	mmu-miR-669h-5p	Atf2	activating transcription factor 2
19230	mmu-miR-142a-3p	Twf1	twinfilin actin binding protein 1
192196	mmu-miR-466i-3p	Luc7l2	LUC7-like 2 (S. cerevisiae)
215201	mmu-miR-466a-5p	Trmt2b	TRM2 tRNA methyltransferase 2B
93711	mmu-miR-296-5p	Pcdhga3	protocadherin gamma subfamily A, 3
13797	mmu-miR-615-3p	Emx2	empty spiracles homeobox 2
209630	mmu-miR-465b-5p	Frmd4a	FERM domain containing 4A
13488	mmu-miR-690	Drd1	dopamine receptor D1
20970	mmu-miR-770-3p	Sdc3	syndecan 3
56403	mmu-miR-290a-5p	Syncrip	synaptotagmin binding, cytoplasmic RNA interacting protein
70984	mmu-miR-669a-5p	4931406C07Rik	RIKEN cDNA 4931406C07 gene
67568	mmu-miR-291a-5p	Mrfap1	Morf4 family associated protein 1
16502	mmu-miR-466i-3p	Kcnc1	potassium voltage gated channel, Shaw-related subfamily, member 1
74734	mmu-miR-770-3p	Rhoh	ras homolog family member H
74091	mmu-miR-125a-3p	Npl	N-acetylneuraminate pyruvate lyase
331623	mmu-miR-466j	Bend3	BEN domain containing 3
74498	mmu-miR-142a-5p	Gorasp1	golgi reassembly stacking protein 1
71207	mmu-miR-338-5p	Nudt4	nudix (nucleoside diphosphate linked moiety X)-type motif 4
56807	mmu-miR-324-5p	Scamp5	secretory carrier membrane protein 5
78134	mmu-miR-125b-5p	Lpar4	lysophosphatidic acid receptor 4
12014	mmu-miR-1187	Bach2	BTB and CNC homology, basic leucine zipper transcription factor 2
15950	mmu-miR-292a-5p	Ifi203	interferon activated gene 203
107733	mmu-miR-883a-5p	Mrpl41	mitochondrial ribosomal protein L41
16561	mmu-miR-713	Kif1b	kinesin family member 1B
14800	mmu-miR-871-5p	Gria2	glutamate receptor, ionotropic, AMPA2 (alpha 2)
13618	mmu-miR-450b-5p	Ednrb	endothelin receptor type B
106861	mmu-miR-669a-5p	Abhd3	abhydrolase domain containing 3
69274	mmu-miR-682	Ctdspl	CTD (carboxy-terminal domain, RNA polymerase II, polypeptide A) small phosphatase-like
19289	mmu-miR-760-3p	Igdcc3	immunoglobulin superfamily, DCC subclass, member 3
12193	mmu-miR-125a-3p	Zfp36l2	zinc finger protein 36, C3H type-like 2
118446	mmu-miR-339-5p	Gjc3	gap junction protein, gamma 3
242409	mmu-miR-1187	Tmem8b	transmembrane protein 8B
20614	mmu-miR-669a-5p	Snap25	synaptosomal-associated protein 25
14202	mmu-miR-883a-5p	Fhl4	four and a half LIM domains 4
223828	mmu-miR-690	Pphln1	periphilin 1
217410	mmu-miR-1190	Trib2	tribbles pseudokinase 2
19305	mmu-miR-882	Pex5	peroxisomal biogenesis factor 5
19211	mmu-miR-763	Pten	phosphatase and tensin homolog
71721	mmu-miR-291a-3p	Fam13c	family with sequence similarity 13, member C
269639	mmu-miR-1190	Zfp512	zinc finger protein 512
329506	mmu-miR-666-3p	Ctdspl2	CTD (carboxy-terminal domain, RNA polymerase II, polypeptide A) small phosphatase like 2
235415	mmu-miR-466j	Cplx3	complexin 3
12801	mmu-miR-129-5p	Cnr1	cannabinoid receptor 1 (brain)
20677	mmu-miR-342-5p	Sox4	SRY (sex determining region Y)-box 4
78771	mmu-miR-34b-5p	Mctp1	multiple C2 domains, transmembrane 1
14313	mmu-miR-1190	Fst	follistatin
66884	mmu-miR-342-5p	Appbp2	amyloid beta precursor protein (cytoplasmic tail) binding protein 2
89867	mmu-miR-345-3p	Sec16b	SEC16 homolog B (S. cerevisiae)
105722	mmu-miR-207	Ano6	anoctamin 6
20621	mmu-miR-484	Snn	stannin
20874	mmu-miR-125a-3p	Slk	STE20-like kinase
13405	mmu-miR-466a-5p	Dmd	dystrophin, muscular dystrophy
12794	mmu-miR-342-5p	Cnih2	cornichon family AMPA receptor auxiliary protein 2
64295	mmu-miR-770-3p	Tmub1	transmembrane and ubiquitin-like domain containing 1
14525	mmu-miR-207	Gcsam	germinal center associated, signaling and motility
55992	mmu-miR-702-3p	Trim3	tripartite motif-containing 3
59069	mmu-miR-743b-3p	Tpm3	tropomyosin 3, gamma
11496	mmu-miR-338-5p	Adam22	a disintegrin and metallopeptidase domain 22
67526	mmu-miR-188-3p	Atg12	autophagy related 12
109700	mmu-miR-199a-3p	Itga1	integrin alpha 1
14423	mmu-miR-466h-5p	Galnt1	UDP-N-acetyl-alpha-D-galactosamine:polypeptide N-acetylgalactosaminyltransferase 1
102657	mmu-miR-666-3p	Cd276	CD276 antigen
29871	mmu-miR-882	Scmh1	sex comb on midleg homolog 1
224105	mmu-miR-423-5p	Pak2	p21 protein (Cdc42/Rac)-activated kinase 2
353190	mmu-miR-666-3p	Edc3	enhancer of mRNA decapping 3
223754	mmu-miR-760-3p	Tbc1d22a	TBC1 domain family, member 22a
72033	mmu-miR-335-3p	Tsc22d2	TSC22 domain family, member 2
20265	mmu-miR-686	Scn1a	sodium channel, voltage-gated, type I, alpha
207615	mmu-miR-34b-5p	Wdr37	WD repeat domain 37
629016	mmu-miR-669h-5p	Zfp953	zinc finger protein 953
20977	mmu-miR-669h-5p	Syp	synaptophysin
56294	mmu-miR-466i-3p	Ptpn9	protein tyrosine phosphatase, non-receptor type 9
69131	mmu-miR-466i-3p	Cdk12	cyclin-dependent kinase 12
20745	mmu-miR-532-3p	Spock1	sparc/osteonectin, cwcv and kazal-like domains proteoglycan 1
231003	mmu-miR-466j	Klhl17	kelch-like 17
326622	mmu-miR-207	Upf2	UPF2 regulator of nonsense transcripts homolog (yeast)
407823	mmu-miR-466f-5p	Baz2b	bromodomain adjacent to zinc finger domain, 2B
218639	mmu-miR-423-3p	Arl15	ADP-ribosylation factor-like 15
72999	mmu-miR-713	Insig2	insulin induced gene 2
18738	mmu-miR-540-3p	Pitpna	phosphatidylinositol transfer protein, alpha
102122	mmu-miR-125a-3p	Fam192a	family with sequence similarity 192, member A
16525	mmu-miR-409-3p	Kcnk1	potassium channel, subfamily K, member 1
66717	mmu-miR-362-3p	Ccdc96	coiled-coil domain containing 96
16553	mmu-miR-466j	Kif13a	kinesin family member 13A
228410	mmu-miR-466g	Cstf3	cleavage stimulation factor, 3' pre-RNA, subunit 3
18109	mmu-miR-770-5p	Mycn	v-myc avian myelocytomatosis viral related oncogene, neuroblastoma derived
353234	mmu-miR-540-3p	Pcdha2	protocadherin alpha 2
76500	mmu-miR-666-3p	Ip6k2	inositol hexaphosphate kinase 2
240354	mmu-miR-199a-5p	Malt1	MALT1 paracaspase
170638	mmu-miR-882	Hpcal4	hippocalcin-like 4
66724	mmu-miR-199a-3p	Tab3	TGF-beta activated kinase 1/MAP3K7 binding protein 3
243914	mmu-miR-484	Lgi4	leucine-rich repeat LGI family, member 4
268490	mmu-miR-883b-5p	Lsm12	LSM12 homolog
17196	mmu-miR-188-3p	Mbp	myelin basic protein
110380	mmu-miR-1187	Shroom2	shroom family member 2
20191	mmu-miR-129-5p	Ryr2	ryanodine receptor 2, cardiac
668166	mmu-miR-423-3p	Zxdb	zinc finger, X-linked, duplicated B
74103	mmu-miR-125a-3p	Nebl	nebulette
26361	mmu-miR-207	Avpr1b	arginine vasopressin receptor 1B
106564	mmu-miR-770-3p	Ppcs	phosphopantothenoylcysteine synthetase
20773	mmu-miR-1187	Sptlc2	serine palmitoyltransferase, long chain base subunit 2
65254	mmu-miR-466i-3p	Dpysl5	dihydropyrimidinase-like 5
54354	mmu-miR-713	Rassf5	Ras association (RalGDS/AF-6) domain family member 5
14167	mmu-miR-669h-5p	Fgf12	fibroblast growth factor 12
76740	mmu-miR-292a-5p	Efr3a	EFR3 homolog A
243312	mmu-miR-297b-5p	Elfn1	leucine rich repeat and fibronectin type III, extracellular 1
22717	mmu-miR-125b-5p	Zfp59	zinc finger protein 59
71435	mmu-miR-466f-5p	Arhgap21	Rho GTPase activating protein 21
100494	mmu-miR-770-5p	Zfand2a	zinc finger, AN1-type domain 2A
69683	mmu-miR-882	Emc10	ER membrane protein complex subunit 10
12622	mmu-miR-882	Cer1	cerberus 1, DAN family BMP antagonist
20452	mmu-miR-362-5p	St8sia4	ST8 alpha-N-acetyl-neuraminide alpha-2,8-sialyltransferase 4
668620	mmu-miR-324-5p	Zfp936	zinc finger protein 936
229615	mmu-miR-450b-3p	Pias3	protein inhibitor of activated STAT 3
69786	mmu-miR-532-3p	Tprkb	Tp53rk binding protein
21813	mmu-miR-292a-3p	Tgfbr2	transforming growth factor, beta receptor II
330450	mmu-miR-1187	Far2	fatty acyl CoA reductase 2
14235	mmu-miR-207	Foxm1	forkhead box M1
12801	mmu-miR-883b-5p	Cnr1	cannabinoid receptor 1 (brain)
239188	mmu-miR-679-5p	Enox1	ecto-NOX disulfide-thiol exchanger 1
107815	mmu-miR-34b-5p	Scml2	sex comb on midleg-like 2 (Drosophila)
17771	mmu-miR-296-3p	Mtl5	metallothionein-like 5, testis-specific (tesmin)
54638	mmu-miR-763	Ccdc22	coiled-coil domain containing 22
64406	mmu-miR-532-3p	Sp5	trans-acting transcription factor 5
20462	mmu-miR-292a-5p	Tra2b	transformer 2 beta homolog (Drosophila)
56392	mmu-miR-1187	Shoc2	soc-2 (suppressor of clear) homolog (C. elegans)
76899	mmu-miR-188-5p	Golga1	golgi autoantigen, golgin subfamily a, 1
13709	mmu-miR-450b-3p	Elf1	E74-like factor 1
242860	mmu-miR-680	Rsbn1l	round spermatid basic protein 1-like
19261	mmu-miR-207	Sirpa	signal-regulatory protein alpha
81535	mmu-miR-466j	Sgpp1	sphingosine-1-phosphate phosphatase 1
67071	mmu-miR-290a-5p	Rps6ka6	ribosomal protein S6 kinase polypeptide 6
74012	mmu-miR-466i-3p	Rap2b	RAP2B, member of RAS oncogene family
14783	mmu-miR-125a-5p	Grb10	growth factor receptor bound protein 10
433693	mmu-miR-188-5p	Akirin2	akirin 2
230119	mmu-miR-770-5p	Zbtb5	zinc finger and BTB domain containing 5
71145	mmu-miR-188-3p	Scara5	scavenger receptor class A, member 5
83762	mmu-miR-882	Otof	otoferlin
16679	mmu-miR-666-3p	Krt86	keratin 86
80889	mmu-miR-423-5p	Mesdc1	mesoderm development candidate 1
231803	mmu-miR-292a-3p	Mepce	methylphosphate capping enzyme
53421	mmu-miR-466f-5p	Sec61a1	Sec61 alpha 1 subunit (S. cerevisiae)
66251	mmu-miR-669a-5p	Arfgap3	ADP-ribosylation factor GTPase activating protein 3
319939	mmu-miR-466b-3p	Tns3	tensin 3
77864	mmu-miR-345-3p	Ypel2	yippee-like 2 (Drosophila)
109624	mmu-miR-686	Cald1	caldesmon 1
16370	mmu-miR-669a-5p	Irs4	insulin receptor substrate 4
26887	mmu-miR-882	Chst4	carbohydrate (chondroitin 6/keratan) sulfotransferase 4
110253	mmu-miR-1187	Triobp	TRIO and F-actin binding protein
58222	mmu-miR-882	Rab37	RAB37, member RAS oncogene family
20450	mmu-miR-291a-3p	St8sia2	ST8 alpha-N-acetyl-neuraminide alpha-2,8-sialyltransferase 2
213491	mmu-miR-690	Szrd1	SUZ RNA binding domain containing 1
23955	mmu-miR-296-3p	Nek4	NIMA (never in mitosis gene a)-related expressed kinase 4
59040	mmu-miR-125a-3p	Rhot1	ras homolog family member T1
67070	mmu-miR-466i-3p	Lsm14a	LSM14A mRNA processing body assembly factor
234734	mmu-miR-363-3p	Aars	alanyl-tRNA synthetase
223693	mmu-miR-760-3p	Tmem184b	transmembrane protein 184b
24135	mmu-miR-292a-3p	Zfp68	zinc finger protein 68
52897	mmu-miR-342-5p	Rbfox3	RNA binding protein, fox-1 homolog (C. elegans) 3
56438	mmu-miR-770-5p	Rbx1	ring-box 1
17381	mmu-miR-669a-5p	Mmp12	matrix metallopeptidase 12
67665	mmu-miR-199a-3p	Dctn4	dynactin 4
19266	mmu-miR-467g	Ptprd	protein tyrosine phosphatase, receptor type, D
50490	mmu-miR-199a-3p	Nox4	NADPH oxidase 4
63985	mmu-miR-129-5p	Gmfb	glia maturation factor, beta
22778	mmu-miR-466j	Ikzf1	IKAROS family zinc finger 1
217695	mmu-miR-125b-5p	Zfyve1	zinc finger, FYVE domain containing 1
223752	mmu-miR-542-3p	Gramd4	GRAM domain containing 4
14390	mmu-miR-129-5p	Gabpa	GA repeat binding protein, alpha
226144	mmu-miR-1190	Erlin1	ER lipid raft associated 1
20901	mmu-miR-540-3p	Strap	serine/threonine kinase receptor associated protein
140743	mmu-miR-680	Rem2	rad and gem related GTP binding protein 2
11488	mmu-miR-882	Adam11	a disintegrin and metallopeptidase domain 11
230738	mmu-miR-423-5p	Zc3h12a	zinc finger CCCH type containing 12A
51902	mmu-miR-666-3p	Rnf24	ring finger protein 24
50793	mmu-miR-883a-5p	Orc3	origin recognition complex, subunit 3
12527	mmu-miR-338-5p	Cd9	CD9 antigen
18759	mmu-miR-713	Prkci	protein kinase C, iota
56469	mmu-miR-466b-3p	Pias1	protein inhibitor of activated STAT 1
73102	mmu-miR-125a-3p	Slc22a23	solute carrier family 22, member 23
216760	mmu-miR-207	Mfap3	microfibrillar-associated protein 3
78656	mmu-miR-467f	Brd8	bromodomain containing 8
76577	mmu-miR-882	Faf2	Fas associated factor family member 2
18626	mmu-miR-763	Per1	period circadian clock 1
17306	mmu-miR-770-3p	Sypl2	synaptophysin-like 2
58245	mmu-miR-362-5p	Gpr180	G protein-coupled receptor 180
53418	mmu-miR-532-3p	B4galt2	UDP-Gal:betaGlcNAc beta 1,4- galactosyltransferase, polypeptide 2
108150	mmu-miR-883b-5p	Galnt7	UDP-N-acetyl-alpha-D-galactosamine: polypeptide N-acetylgalactosaminyltransferase 7
73122	mmu-miR-669a-5p	Tgfbrap1	transforming growth factor, beta receptor associated protein 1
381760	mmu-miR-466b-3p	Ssbp1	single-stranded DNA binding protein 1
18604	mmu-miR-465a-3p	Pdk2	pyruvate dehydrogenase kinase, isoenzyme 2
328365	mmu-miR-680	Zmiz1	zinc finger, MIZ-type containing 1
20249	mmu-miR-760-3p	Scd1	stearoyl-Coenzyme A desaturase 1
227835	mmu-miR-666-5p	Gtdc1	glycosyltransferase-like domain containing 1
19348	mmu-miR-338-5p	Kif20a	kinesin family member 20A
11539	mmu-miR-207	Adora1	adenosine A1 receptor
338346	mmu-miR-882	Gpr21	G protein-coupled receptor 21
12167	mmu-miR-212-3p	Bmpr1b	bone morphogenetic protein receptor, type 1B
242259	mmu-miR-409-3p	Slc44a5	solute carrier family 44, member 5
330941	mmu-miR-423-5p	AI593442	expressed sequence AI593442
55963	mmu-miR-466d-3p	Slc1a4	solute carrier family 1 (glutamate/neutral amino acid transporter), member 4
231659	mmu-miR-669a-5p	Gcn1l1	GCN1 general control of amino-acid synthesis 1-like 1 (yeast)
20471	mmu-miR-882	Six1	sine oculis-related homeobox 1
22630	mmu-miR-669h-5p	Ywhaq	tyrosine 3-monooxygenase/tryptophan 5-monooxygenase activation protein, theta polypeptide
17356	mmu-miR-466h-5p	Mllt4	myeloid/lymphoid or mixed-lineage leukemia; translocated to, 4
13844	mmu-miR-882	Ephb2	Eph receptor B2
109652	mmu-miR-362-5p	Acy1	aminoacylase 1
12939	mmu-miR-882	Pcdha7	protocadherin alpha 7
77803	mmu-miR-666-3p	Fam159b	family with sequence similarity 159, member B
70771	mmu-miR-882	Gpr173	G-protein coupled receptor 173
66816	mmu-miR-690	Thap2	THAP domain containing, apoptosis associated protein 2
18039	mmu-miR-345-3p	Nefl	neurofilament, light polypeptide
16835	mmu-miR-490-3p	Ldlr	low density lipoprotein receptor
14089	mmu-miR-338-5p	Fap	fibroblast activation protein
229593	mmu-miR-871-5p	Golph3l	golgi phosphoprotein 3-like
319642	mmu-miR-679-5p	Rab9b	RAB9B, member RAS oncogene family
118453	mmu-miR-763	Mmp28	matrix metallopeptidase 28 (epilysin)
245469	mmu-miR-702-3p	Pdzd4	PDZ domain containing 4
380684	mmu-miR-669h-5p	Nefh	neurofilament, heavy polypeptide
76132	mmu-miR-466i-3p	Faxc	failed axon connections homolog
15434	mmu-miR-362-3p	Hoxd3	homeobox D3
12421	mmu-miR-760-3p	Rb1cc1	RB1-inducible coiled-coil 1
68295	mmu-miR-484	Aar2	AAR2 splicing factor homolog
22608	mmu-miR-540-3p	Ybx1	Y box protein 1
22785	mmu-miR-1190	Slc30a4	solute carrier family 30 (zinc transporter), member 4
12394	mmu-miR-129-5p	Runx1	runt related transcription factor 1
229731	mmu-miR-331-5p	Slc25a24	solute carrier family 25 (mitochondrial carrier, phosphate carrier), member 24
68038	mmu-miR-342-5p	Chid1	chitinase domain containing 1
12291	mmu-miR-151-3p	Cacna1g	calcium channel, voltage-dependent, T type, alpha 1G subunit
66270	mmu-miR-1191a	Fam134b	family with sequence similarity 134, member B
29820	mmu-miR-292a-3p	Tnfrsf19	tumor necrosis factor receptor superfamily, member 19
100072	mmu-miR-680	Camta1	calmodulin binding transcription activator 1
72587	mmu-miR-490-3p	Pan3	PAN3 poly(A) specific ribonuclease subunit
17385	mmu-miR-125a-3p	Mmp11	matrix metallopeptidase 11
18044	mmu-miR-342-5p	Nfya	nuclear transcription factor-Y alpha
77053	mmu-miR-363-3p	Sun1	Sad1 and UNC84 domain containing 1
16522	mmu-miR-423-5p	Kcnj6	potassium inwardly-rectifying channel, subfamily J, member 6
16570	mmu-miR-679-5p	Kif3c	kinesin family member 3C
68151	mmu-miR-292a-3p	Wls	wntless homolog (Drosophila)
68292	mmu-miR-671-3p	Stt3b	STT3, subunit of the oligosaccharyltransferase complex, homolog B (S. cerevisiae)
235584	mmu-miR-1187	Dusp7	dual specificity phosphatase 7
12043	mmu-miR-669h-5p	Bcl2	B cell leukemia/lymphoma 2
320460	mmu-miR-188-5p	Vwc2l	von Willebrand factor C domain-containing protein 2-like
93760	mmu-miR-882	Arid1a	AT rich interactive domain 1A (SWI-like)
70791	mmu-miR-297b-5p	Hars2	histidyl-tRNA synthetase 2
18191	mmu-miR-1190	Nrxn3	neurexin III
240066	mmu-miR-467g	Zfp870	zinc finger protein 870
56309	mmu-miR-1187	Mycbp	MYC binding protein
71911	mmu-miR-883b-5p	Bdh1	3-hydroxybutyrate dehydrogenase, type 1
52132	mmu-miR-770-3p	Ccdc97	coiled-coil domain containing 97
13058	mmu-miR-297b-5p	Cybb	cytochrome b-245, beta polypeptide
100727	mmu-miR-1187	Ugt2b34	UDP glucuronosyltransferase 2 family, polypeptide B34
242409	mmu-miR-770-5p	Tmem8b	transmembrane protein 8B
14465	mmu-miR-666-3p	Gata6	GATA binding protein 6
68666	mmu-miR-760-3p	Svop	SV2 related protein
68465	mmu-miR-540-3p	Adipor2	adiponectin receptor 2
17842	mmu-miR-291b-3p	Mup3	major urinary protein 3
66315	mmu-miR-212-3p	Senp7	SUMO1/sentrin specific peptidase 7
212999	mmu-miR-702-3p	Tnpo2	transportin 2 (importin 3, karyopherin beta 2b)
77976	mmu-miR-883b-5p	Nuak1	NUAK family, SNF1-like kinase, 1
22324	mmu-miR-882	Vav1	vav 1 oncogene
70611	mmu-miR-763	Fbxo33	F-box protein 33
20181	mmu-miR-680	Rxra	retinoid X receptor alpha
16594	mmu-miR-883a-5p	Klc2	kinesin light chain 2
18002	mmu-miR-760-3p	Nedd8	neural precursor cell expressed, developmentally down-regulated gene 8
56469	mmu-miR-291a-5p	Pias1	protein inhibitor of activated STAT 1
218543	mmu-miR-501-3p	Srek1	splicing regulatory glutamine/lysine-rich protein 1
231712	mmu-miR-770-5p	Trafd1	TRAF type zinc finger domain containing 1
226098	mmu-miR-34b-5p	Hectd2	HECT domain containing 2
18646	mmu-miR-34b-5p	Prf1	perforin 1 (pore forming protein)
74479	mmu-miR-1191a	Snx11	sorting nexin 11
215008	mmu-miR-666-3p	Vezt	vezatin, adherens junctions transmembrane protein
30952	mmu-miR-450b-3p	Cngb3	cyclic nucleotide gated channel beta 3
81840	mmu-miR-882	Sorcs2	sortilin-related VPS10 domain containing receptor 2
230779	mmu-miR-883b-5p	Serinc2	serine incorporator 2
18933	mmu-miR-883b-5p	Prrx1	paired related homeobox 1
107971	mmu-miR-1190	Frs3	fibroblast growth factor receptor substrate 3
213988	mmu-miR-1187	Tnrc6b	trinucleotide repeat containing 6b
214133	mmu-miR-466h-5p	Tet2	tet methylcytosine dioxygenase 2
21374	mmu-miR-34b-5p	Tbp	TATA box binding protein
21750	mmu-miR-882	Terf2	telomeric repeat binding factor 2
338523	mmu-miR-362-3p	Kdm7a	lysine (K)-specific demethylase 7A
244421	mmu-miR-770-5p	Lonrf1	LON peptidase N-terminal domain and ring finger 1
108767	mmu-miR-666-3p	Pnrc1	proline-rich nuclear receptor coactivator 1
269784	mmu-miR-679-5p	Cntn4	contactin 4
17295	mmu-miR-34b-5p	Met	met proto-oncogene
67657	mmu-miR-292a-5p	Rabl3	RAB, member RAS oncogene family-like 3
77766	mmu-miR-292a-5p	Elp4	elongator acetyltransferase complex subunit 4
18627	mmu-miR-882	Per2	period circadian clock 2
116870	mmu-miR-423-5p	Mta1	metastasis associated 1
78405	mmu-miR-324-5p	Ntf5	neurotrophin 5
74287	mmu-miR-1187	Kcmf1	potassium channel modulatory factor 1
29808	mmu-miR-450b-3p	Mga	MAX gene associated
641376	mmu-miR-770-3p	Tomm40l	translocase of outer mitochondrial membrane 40 homolog-like (yeast)
235442	mmu-miR-682	Rab8b	RAB8B, member RAS oncogene family
56758	mmu-miR-292a-5p	Mbnl1	muscleblind-like 1 (Drosophila)
237898	mmu-miR-466j	Usp32	ubiquitin specific peptidase 32
224344	mmu-miR-362-5p	Rbm11	RNA binding motif protein 11
245424	mmu-miR-34b-5p	Gpr101	G protein-coupled receptor 101
72745	mmu-miR-291a-5p	Tmem161b	transmembrane protein 161B
18163	mmu-miR-467f	Ctnnd2	catenin (cadherin associated protein), delta 2
19713	mmu-miR-713	Ret	ret proto-oncogene
218820	mmu-miR-292a-5p	Zfp503	zinc finger protein 503
73106	mmu-miR-679-5p	Prss57	protease, serine 57
58231	mmu-miR-1190	Stk4	serine/threonine kinase 4
216825	mmu-miR-466i-3p	Usp22	ubiquitin specific peptidase 22
54646	mmu-miR-338-3p	Ppp1r3f	protein phosphatase 1, regulatory (inhibitor) subunit 3F
22195	mmu-miR-763	Ube2l3	ubiquitin-conjugating enzyme E2L 3
93713	mmu-miR-484	Pcdhga5	protocadherin gamma subfamily A, 5
68365	mmu-miR-669a-5p	Rab14	RAB14, member RAS oncogene family
224807	mmu-miR-207	Tmem63b	transmembrane protein 63b
246229	mmu-miR-199a-5p	Bivm	basic, immunoglobulin-like variable motif containing
217980	mmu-miR-207	Larp4b	La ribonucleoprotein domain family, member 4B
108089	mmu-miR-466h-5p	Rnf144a	ring finger protein 144A
268297	mmu-miR-686	Scml4	sex comb on midleg-like 4 (Drosophila)
98267	mmu-miR-466g	Stk17b	serine/threonine kinase 17b (apoptosis-inducing)
78334	mmu-miR-362-5p	Cdk19	cyclin-dependent kinase 19
233033	mmu-miR-423-5p	Samd4b	sterile alpha motif domain containing 4B
235415	mmu-miR-466h-5p	Cplx3	complexin 3
22379	mmu-miR-770-3p	Fmnl3	formin-like 3
20932	mmu-miR-345-3p	Surf4	surfeit gene 4
14904	mmu-miR-34b-5p	Gtpbp1	GTP binding protein 1
219135	mmu-miR-466g	Mtmr6	myotubularin related protein 6
55946	mmu-miR-345-3p	Ap3m1	adaptor-related protein complex 3, mu 1 subunit
230959	mmu-miR-297b-5p	Ajap1	adherens junction associated protein 1
226841	mmu-miR-1190	Vash2	vasohibin 2
13688	mmu-miR-680	Eif4ebp2	eukaryotic translation initiation factor 4E binding protein 2
232086	mmu-miR-125a-3p	Tmem150a	transmembrane protein 150A
18479	mmu-miR-423-5p	Pak1	p21 protein (Cdc42/Rac)-activated kinase 1
13607	mmu-miR-151-5p	Eda	ectodysplasin-A
78560	mmu-miR-680	Adgra2	adhesion G protein-coupled receptor A2
24135	mmu-miR-804	Zfp68	zinc finger protein 68
16196	mmu-miR-142a-3p	Il7	interleukin 7
53621	mmu-miR-409-3p	Cnot4	CCR4-NOT transcription complex, subunit 4
268420	mmu-miR-125a-3p	Alkbh5	alkB homolog 5, RNA demethylase
109934	mmu-miR-1190	Abr	active BCR-related gene
226151	mmu-miR-883a-5p	Fam178a	family with sequence similarity 178, member A
20358	mmu-miR-466c-5p	Sema6a	sema domain, transmembrane domain (TM), and cytoplasmic domain, (semaphorin) 6A
21825	mmu-miR-466j	Thbs1	thrombospondin 1
414872	mmu-miR-883b-5p	Zyg11b	zyg-ll family member B, cell cycle regulator
217304	mmu-miR-362-3p	Cd300lb	CD300 antigen like family member B
68770	mmu-miR-363-3p	Phtf2	putative homeodomain transcription factor 2
14151	mmu-miR-466j	Fech	ferrochelatase
320183	mmu-miR-125b-5p	Msrb3	methionine sulfoxide reductase B3
63985	mmu-miR-871-5p	Gmfb	glia maturation factor, beta
381990	mmu-miR-532-3p	Zbtb2	zinc finger and BTB domain containing 2
269053	mmu-miR-763	Gpr152	G protein-coupled receptor 152
225724	mmu-miR-423-3p	Mapk4	mitogen-activated protein kinase 4
13641	mmu-miR-763	Efnb1	ephrin B1
70791	mmu-miR-1187	Hars2	histidyl-tRNA synthetase 2
67039	mmu-miR-466d-3p	Rbm25	RNA binding motif protein 25
11518	mmu-miR-804	Add1	adducin 1 (alpha)
52609	mmu-miR-466h-5p	Cbx7	chromobox 7
101358	mmu-miR-669f-3p	Fbxl14	F-box and leucine-rich repeat protein 14
15925	mmu-miR-125a-3p	Ide	insulin degrading enzyme
240690	mmu-miR-362-3p	St18	suppression of tumorigenicity 18
17113	mmu-miR-199a-5p	M6pr	mannose-6-phosphate receptor, cation dependent
15465	mmu-miR-296-3p	Hrh1	histamine receptor H1
329154	mmu-miR-669h-5p	Ankrd44	ankyrin repeat domain 44
226122	mmu-miR-296-5p	Ubtd1	ubiquitin domain containing 1
74111	mmu-miR-760-3p	Rbm19	RNA binding motif protein 19
[truncated: 10,302 more rows]

## Sheet: Supplementary Table S3
Term_ID	Term_description	Term_url	ListHit	ListTotal	PopHit	PopTotal	FoldEnrichment	Genes	GeneSymbols	miRNAs	P_value	"-log10(pvalue)"	FDR_bh
path:mmu05200	Pathways in cancer	http://www.kegg.jp/kegg-bin/show_pathway?mmu05200/22034%09yellow/14706%09yellow/20662%09yellow/56438%09yellow/14673%09yellow/16403%09yellow/18176%09yellow/18591%09yellow/11836%09yellow/110279%09yellow/12829%09yellow/16399%09yellow/12567%09yellow/14268%09yellow/12371%09yellow/11652%09yellow/12122%09yellow/11512%09yellow/12571%09yellow/12402%09yellow/22418%09yellow/22421%09yellow/78134%09yellow/146…	204	2198	398	7763	1.89319	22034;14706;20662;56438;14673;16403;18176;18591;11836;110279;12829;16399;12567;14268;12371;11652;12122;11512;12571;12402;22418;22421;78134;14678;30955;14083;14708;14697;14165;216795;19713;12550;72993;14170;14745;58231;110157;64654;17128;21415;56458;80903;22032;22339;224129;12394;17187;16001;14683;18095;22414;69635;71745;16801;13176;56044;242705;12828;15245;226519;19216;19419;18708;18596;18795;140…	Traf6;Gng4;Sos1;Rbx1;Gna12;Itga6;Nras;Pdgfb;Araf;Bcr;Col4a4;Itga2b;Cdk4;Fn1;Casp9;Akt2;Bid;Adcy6;Cdk6;Cbl;Wnt5a;Wnt7a;Lpar4;Gnai2;Pik3cg;Ptk2;Gng7;Gnb5;Fgf10;Wnt9a;Ret;Cdh1;Appl1;Fgf15;Lpar1;Stk4;Raf1;Fgf23;Smad4;Tcf7l1;Foxo1;Fgf16;Traf4;Vegfa;Adcy5;Runx1;Max;Igf1r;Gnas;Nkx3-1;Wnt2b;Dapk1;Cul2;Arhgef1;Dcc;Rala;E2f2;Col4a3;Hhip;Lamc1;Ptger1;Rasgrp1;Pik3r1;Pdgfrb;Plcb1;Fadd;Mitf;Kras;Fgfr2;Prkx;Hif…	mmu-miR-125b-5p;mmu-miR-702-3p;mmu-miR-466g;mmu-miR-686;mmu-miR-669f-3p;mmu-miR-125a-5p;mmu-miR-542-5p;mmu-miR-125a-3p;mmu-miR-882;mmu-miR-1190;mmu-miR-129-5p;mmu-miR-582-5p;mmu-miR-871-5p;mmu-miR-207;mmu-miR-339-5p;mmu-miR-362-3p;mmu-miR-338-5p;mmu-miR-669a-5p;mmu-miR-363-3p;mmu-miR-34b-5p;mmu-miR-199a-3p;mmu-miR-188-5p;mmu-miR-467g;mmu-miR-466d-3p;mmu-miR-466j;mmu-miR-465a-3p;mmu-miR-883b-5p;mm…	4.0898e-12	11.3883	1.14923e-09
path:mmu04810	Regulation of actin cytoskeleton	http://www.kegg.jp/kegg-bin/show_pathway?mmu04810/109711%09yellow/20662%09yellow/241226%09yellow/12632%09yellow/14673%09yellow/16403%09yellow/18176%09yellow/18591%09yellow/54126%09yellow/68089%09yellow/11836%09yellow/16404%09yellow/16885%09yellow/214230%09yellow/16399%09yellow/319480%09yellow/14268%09yellow/22350%09yellow/30955%09yellow/14083%09yellow/14165%09yellow/14170%09yellow/110157%09yellow…	123	2198	217	7763	2.06131	109711;20662;241226;12632;14673;16403;18176;18591;54126;68089;11836;16404;16885;214230;16399;319480;14268;22350;30955;14083;14165;14170;110157;117150;224105;320910;64654;232906;18643;329165;80903;67771;71960;19047;17931;216963;73178;19684;16801;109700;16402;20779;18718;66922;105855;18708;18596;16653;14183;76884;16400;107589;14182;69632;20130;19353;104099;18479;26395;544963;14674;16886;19877;18711…	Actn1;Sos1;Itga8;Cfl2;Gna12;Itga6;Nras;Pdgfb;Arhgef7;Arpc4;Araf;Itga7;Limk1;Pak6;Itga2b;Itga11;Fn1;Ezr;Pik3cg;Ptk2;Fgf10;Fgf15;Raf1;Pip4k2c;Pak2;Itgb8;Fgf23;Arhgap35;Pfn1;Abi2;Fgf16;Arpc5;Myh14;Ppp1cc;Ppp1r12a;Git1;Wasl;Rdx;Arhgef1;Itga1;Itga5;Src;Pip4k2a;Rras2;Nckap1l;Pik3r1;Pdgfrb;Kras;Fgfr2;Cyfip2;Itga3;Mylk;Fgfr1;Arhgef12;Rras;Rac1;Itga9;Pak1;Map2k1;Iqgap2;Gna13;Limk2;Rock1;Pikfyve;Crk;Fgf5;D…	mmu-miR-125b-5p;mmu-miR-423-5p;mmu-miR-702-3p;mmu-miR-290a-5p;mmu-miR-296-5p;mmu-miR-335-3p;mmu-miR-345-3p;mmu-miR-679-5p;mmu-miR-770-5p;mmu-miR-331-5p;mmu-miR-466g;mmu-miR-883a-5p;mmu-miR-291b-3p;mmu-miR-125a-5p;mmu-miR-680;mmu-miR-770-3p;mmu-miR-542-5p;mmu-miR-125a-3p;mmu-miR-882;mmu-miR-423-3p;mmu-miR-669i;mmu-miR-1190;mmu-miR-340-5p;mmu-miR-466a-5p;mmu-miR-129-5p;mmu-miR-296-3p;mmu-miR-466i-3…	1.13868e-09	8.9436	1.59985e-07
[truncated: 279 more rows]

## Sheet: Supplementary Table S4
systematic_name	FC ([KPC] vs [MPDC])	Log FC ([KPC] vs [MPDC])	FC (abs) ([KPC] vs [MPDC])	Regulation ([KPC] vs [MPDC])	KPC.txt:gTotalProbeSignal(raw)	MPDC.txt:gTotalProbeSignal(raw)	KPC.txt:gTotalProbeSignal(normalized)	MPDC.txt:gTotalProbeSignal(normalized)	KPC.txt:gFEFlags	MPDC.txt:gFEFlags	active_sequence	mirbase accession No	chr	start	stop	strand	control_type
mmu-miR-290b-5p	50882.5	15.6349	50882.5	up	2760.12	0.1	12.3129	-3.32194	Detected	Not Detected	AAAGTGCCGCCTAGT	MIMAT0029900					0
mmu-miR-7231-5p	11276.4	13.461	11276.4	up	3382.79	4.06825	12.8123	-0.64876	Detected	Detected	GGTATGCCCCAGTGT	MIMAT0028430					0
mmu-miR-3104-5p	4880.76	12.2529	4880.76	up	1896.65	4.92019	11.7413	-0.511607	Detected	Detected	AGAGGGCTCCGGC	MIMAT0014939					0
mmu-miR-194-1-3p	2265.02	11.1453	2265.02	up	118.63	0.1	7.82337	-3.32194	Detected	Not Detected	GAAGTAACAGCAGCTCC	MIMAT0016999	chr1	187137245	187137260	-	0
mmu-miR-3106-5p	2165.53	11.0805	2165.53	up	1428.48	13.336	11.2882	0.20766	Detected	Detected	TGGCTGCTTCTAAATGAG	MIMAT0014817	chr8	16168790	16168774	+	0
mmu-miR-369-5p	1980.69	10.9518	1980.69	up	105.537	0.1	7.62985	-3.32194	Detected	Not Detected	GCGAATATAACACGGTCGAT	MIMAT0003185					0
mmu-miR-7003-5p	1847.64	10.8515	1847.64	up	100.874	0.1	7.52953	-3.32194	Detected	Not Detected	CTGCCGCAGCTTC	MIMAT0027910					0
mmu-miR-292b-5p	1787.31	10.8036	1787.31	up	99.0517	0.1	7.48163	-3.32194	Detected	Not Detected	AAAAGTGCCGCCAGG	MIMAT0029864					0
[truncated: 791 more rows]

## Sheet: Supplementary Table S5
systematic_name	FC ([KPC] vs [MPDC])	Log FC ([KPC] vs [MPDC])	FC (abs) ([KPC] vs [MPDC])	Regulation ([KPC] vs [MPDC])	KPC.txt:gTotalProbeSignal(raw)	MPDC.txt:gTotalProbeSignal(raw)	KPC.txt:gTotalProbeSignal(normalized)	MPDC.txt:gTotalProbeSignal(normalized)	KPC.txt:gFEFlags	MPDC.txt:gFEFlags	active_sequence	mirbase accession No	chr	start	stop	strand	control_type
[truncated: 59 more rows]
